# Supplementary material for: Rejuvenating the ocean: mean ocean radiocarbon, CO 2 release, and radiocarbon budget closure across the last deglaciation
Source: Copernicus journal article supplement (doi:10.5194/cp-19-2177-2023), 2023-11-03
Supplement: Supplementary file 1 [file cp-19-2177-2023-supplement.zip]

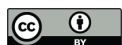

## *Supplement of*

# **Rejuvenating the ocean: mean ocean radiocarbon, CO<sub>2</sub> release, and radiocarbon budget closure across the last deglaciation**

**Luke Skinner et al.**

*Correspondence to:* Luke Skinner ([lcs32@cam.ac.uk](mailto:lcs32@cam.ac.uk))

- [cp-19-2177-2023-supplement-title-page.pdf](#)
- [DeglacialTS\\_zonav\\_V4uni\\_exp\\_b.nc](#)
- [Rejuvenating the ocean\\_CPD\\_SUPPLEMENT.docx](#)
- [Skinner et al\\_2023\\_14CData.xlsx](#)
- [TableS1.xlsx](#)

The copyright of individual parts of the supplement might differ from the article licence.
