# Supplementary material for: Rejuvenating the ocean: mean ocean radiocarbon, CO 2 release, and radiocarbon budget closure across the last deglaciation
Source: Copernicus journal article supplement (doi:10.5194/cp-19-2177-2023), 2023-11-03
Supplement: Supplementary file 2 [file Skinner et al_2023_14CData.xlsx]

## Sheet: Data
Last updated 1/9/23
Latitude (degrees north)	Longitude (degrees east)	Water depth (m)	Calendar age (years BP)	Calendar age uncertainty (1 sigma)	Age model class (TS = Bchron age model using Marine20, S = 'spot' calibrated age using Marine 20, C = corrected to Intcal20 by using the published cal age and the Intcal20-13 offset, NA = no age update applied)	Planktonic 14C age (years)	Planktonic 14C age uncertainty (1 sigma)	Benthic 14C age (years)	Benthic 14C age uncertainty (1 sigma)	Benthic-Planktonic 14C age offset (years)	Benthic-Planktonic 14C age offset uncertainty (1 sigma)	Coeval atmospheric 14C age, Intcal20 (years)	R-age or B-Atm, Benthic-atmosphere 14C age offset (years)	R-age or B-Atm, Benthic-atmosphere 14C age offset uncertainty (1 sigma)	Modern seawater-atmosphere 14C age offset, GLODAP (years)	Ocean basin (1= North Atlantic, 2=South Atlantic, 3=North Pacific, 4=South Pacific, 5=Indian, 6 = Arctic, 7 = Mediterranean, 8=Southern Ocean)	Record number	Time slice allocation	Site name	Reference	Estimated sedimentation rate (cm/kyr)	Flag comments	INCLUDE BASELINE FLAGS (y=1/n=0)	INCLUDE LOW SEDIMENTATION FLAGS (y=1/n=0)	INCLUDE HIGH SED RATE FLAGS ONLY (y=1/n=0)
42	-29	1756.5	12910	120	C	NaN	NaN	11860	60	NaN	NaN	11017	856	166	662	1	1	BA (12.8-14.8)	JFA17	Adkins et al. (1998)	NaN		1	1	1
42	-29	1756.5	13690	220	C	NaN	NaN	12120	60	NaN	NaN	11836	281	153	662	1	1	BA (12.8-14.8)	JFA2	Adkins et al. (1998)	NaN		1	1	1
38	-62	1954	15540	175	C	NaN	NaN	13980	40	NaN	NaN	12962	1004	133.5	677	1	1	HS1 (15-17.5)	JFA20.10 bottom	Adkins et al. (1998)	NaN		1	1	1
38	-62	1954	15440	175	C	NaN	NaN	14120	40	NaN	NaN	12912	1202	135.25	677	1	1	HS1 (15-17.5)	JFA20.10 top	Adkins et al. (1998)	NaN		1	1	1
38	-60	1784	15540	85	C	NaN	NaN	14060	40	NaN	NaN	12962	1089	78.75	671	1	1	HS1 (15-17.5)	JFA24.19 bottom	Adkins et al. (1998)	NaN		1	1	1
38	-60	1784	15490	85	C	NaN	NaN	14500	50	NaN	NaN	12931	1559	80.5	671	1	1	HS1 (15-17.5)	JFA24.19 middle	Adkins et al. (1998)	NaN		1	1	1
38	-60	1784	15440	85	C	NaN	NaN	14500	50	NaN	NaN	12912	1584	79.25	671	1	1	HS1 (15-17.5)	JFA24.19 top	Adkins et al. (1998)	NaN		1	1	1
38	-60	1784	15540	130	C	NaN	NaN	13850	40	NaN	NaN	12962	876	103.25	671	1	1	HS1 (15-17.5)	JFA24.8 bottom	Adkins et al. (1998)	NaN		1	1	1
38	-60	1784	15490	130	C	NaN	NaN	14470	50	NaN	NaN	12931	1526	106.5	671	1	1	HS1 (15-17.5)	JFA24.8 middle	Adkins et al. (1998)	NaN		1	1	1
38	-60	1784	15440	130	C	NaN	NaN	14520	40	NaN	NaN	12912	1603	102.75	671	1	1	HS1 (15-17.5)	JFA24.8 top	Adkins et al. (1998)	NaN		1	1	1
38	-60	1784	15400	200	C	NaN	NaN	14090	60	NaN	NaN	12902	1195	158.5	671	1	1	HS1 (15-17.5)	JFA24C	Adkins et al. (1998)	NaN		1	1	1
41.12	142.4	1366	2766	98	TS	3290	80	4660	80	1370	113	2684	2005	138.5	2070	3	2	HOL (<6)	MR01-K03 PC4/5	Ahagon et al. (2003)	6.14606		1	1	0
41.12	142.4	1366	3983	251	TS	4270	200	5970	80	1700	215	3671	2306	198.25	2070	3	2	HOL (<6)	MR01-K03 PC4/5	Ahagon et al. (2003)	10.0427		1	1	1
41.12	142.4	1366	5456	252	TS	5450	220	6630	80	1180	234	4689.2	1902	220	2070	3	2	HOL (<6)	MR01-K03 PC4/5	Ahagon et al. (2003)	11.5469		1	1	1
41.12	142.4	1366	7634.5	209	TS	7500	220	9020	80	1520	234	6797.4	2220	252.75	2070	3	2	EHOL (7-11)	MR01-K03 PC4/5	Ahagon et al. (2003)	13.2294		1	1	1
41.12	142.4	1366	11463	85	TS	10600	50	11370	50	770	71	10010	1353	64.5	2070	3	2		MR01-K03 PC4/5	Ahagon et al. (2003)	20.1518		1	1	1
41.12	142.4	1366	11934	86	TS	10900	55	11930	60	1030	81	10228	1679	85.75	2070	3	2	YD (11.8-12.7)	MR01-K03 PC4/5	Ahagon et al. (2003)	21.9541		1	1	1
41.12	142.4	1366	12631	51	TS	11420	60	12600	50	1180	78	10606	2027	86.25	2070	3	2	YD (11.8-12.7)	MR01-K03 PC4/5	Ahagon et al. (2003)	23.0386		1	1	1
41.12	142.4	1366	13392	50	TS	12230	50	13650	100	1420	112	11511	2127	112.75	2070	3	2	BA (12.8-14.8)	MR01-K03 PC4/5	Ahagon et al. (2003)	23.2228		1	1	1
41.12	142.4	1366	15151	107	TS	13450	85	14250	120	800	147	12708	1542	149.25	2070	3	2	HS1 (15-17.5)	MR01-K03 PC4/5	Ahagon et al. (2003)	23.9588		1	1	1
41.12	142.4	1366	16073	69	TS	14150	55	14830	60	680	81	13364	1469	81	2070	3	2	HS1 (15-17.5)	MR01-K03 PC4/5	Ahagon et al. (2003)	25.1975		1	1	1
41.12	142.4	1366	18793	107	TS	16450	110	17650	100	1200	149	15471	2165	187.25	2070	3	2		MR01-K03 PC4/5	Ahagon et al. (2003)	28.7341		1	1	1
41.12	142.4	1366	20853	73	TS	18200	65	19650	110	1450	128	17256	2384	146.5	2070	3	2	LGM (19-21.8)	MR01-K03 PC4/5	Ahagon et al. (2003)	30.7869		1	1	1
41.12	142.4	1366	24644	254	TS	21500	220	22900	320	1400	388	20496	2413	360.25	2070	3	2		MR01-K03 PC4/5	Ahagon et al. (2003)	34.2883		1	1	1
41.12	142.4	1366	26787	216	TS	23560	220	24880	220	1320	311	22357	2435	280.75	2070	3	2	preLGM (25-30)	MR01-K03 PC4/5	Ahagon et al. (2003)	35.3156		1	1	1
41.12	142.4	1366	28899	331	TS	25700	300	27540	300	1840	424	24670	2870	450.25	2070	3	2	preLGM (25-30)	MR01-K03 PC4/5	Ahagon et al. (2003)	37.4407		1	1	1
41.12	142.4	1366	33631	383	TS	30130	360	30700	320	570	482	29033	1606	468.75	2070	3	2		MR01-K03 PC4/5	Ahagon et al. (2003)	39.3684		1	1	1
7.2	112.2	2030	4689	111	TS	4860	90	6420	100	1560	135	4132	2271	129	1978	3	3	HOL (<6)	V35-6	Andree et al. (1986)	1.70612	Low sed rate <2cm/kyr	0	1	0
7.2	112.2	2030	7971	114	TS	7890	110	9210	130	1320	170	7161	2051	180.5	1978	3	3	EHOL (7-11)	V35-6	Andree et al. (1986)	4.64183		1	1	0
7.2	112.2	2030	9023	163	TS	8780	120	9760	130	980	177	8134.8	1660	175.25	1978	3	3	EHOL (7-11)	V35-6	Andree et al. (1986)	4.98725		1	1	0
7.2	112.2	2030	9977	161	TS	9550	120	10810	150	1260	192	8925.8	1937	180.5	1978	3	3	EHOL (7-11)	V35-6	Andree et al. (1986)	5.71314		1	1	0
7.2	112.2	2030	10783	171	TS	10130	120	11290	150	1160	192	9554.8	1773	184.25	1978	3	3	EHOL (7-11)	V35-6	Andree et al. (1986)	6.30622		1	1	0
7.2	112.2	2030	12738	130	TS	11590	140	12950	160	1360	213	10775	2173	237.25	1978	3	3		V35-6	Andree et al. (1986)	6.98697		1	1	0
7.2	112.2	2030	13708	195	TS	12540	160	13550	170	1010	233	11822	1694	249.25	1978	3	3	BA (12.8-14.8)	V35-6	Andree et al. (1986)	7.14911		1	1	0
7.195	112.077	1953	1293	479	TS	2055	100	3610	100	1555	141	1365	2186	466	1950	3	4	HOL (<6)	V35-5	Andree et al. (1986); Broecker et al. (1988b)	7.73395		1	1	0
7.195	112.077	1953	5793	428	TS	5830	110	7110	120	1280	163	5081.2	2041	388	1950	3	4	HOL (<6)	V35-5	Andree et al. (1986); Broecker et al. (1988b)	10.3573		1	1	1
7.195	112.077	1953	7626.5	288	TS	7500	150	8870	160	1370	219	6801	2082	349.75	1950	3	4	EHOL (7-11)	V35-5	Andree et al. (1986); Broecker et al. (1988b)	11.1453		1	1	1
7.195	112.077	1953	8210	267	TS	8190	140	10930	190	2740	236	7439	3519	330.5	1950	3	4	EHOL (7-11)	V35-5	Andree et al. (1986); Broecker et al. (1988b)	10.9622		1	1	1
7.195	112.077	1953	9331.5	217	TS	9050	160	10910	180	1860	241	8348.5	2574	269	1950	3	4	EHOL (7-11)	V35-5	Andree et al. (1986); Broecker et al. (1988b)	11.788		1	1	1
7.195	112.077	1953	9995.5	372	TS	9520	150	11690	130	2170	198	8875.6	2794	328.75	1950	3	4	EHOL (7-11)	V35-5	Andree et al. (1986); Broecker et al. (1988b)	12.0054		1	1	1
7.195	112.077	1953	12627	426	TS	11580	200	12620	190	1040	276	10600	1959	417	1950	3	4		V35-5	Andree et al. (1986); Broecker et al. (1988b)	11.8793		1	1	1
7.195	112.077	1953	15477	341	TS	13740	190	16330	250	2590	314	12926	3382	341.25	1950	3	4	HS1 (15-17.5)	V35-5	Andree et al. (1986); Broecker et al. (1988b)	13.5685		1	1	1
7.195	112.077	1953	16986	450	TS	14990	420	17010	230	2020	479	13932	3017	386.5	1950	3	4	HS1 (15-17.5)	V35-5	Andree et al. (1986); Broecker et al. (1988b)	14.1293		1	1	1
7.195	112.077	1953	18419	373	TS	16170	290	17810	350	1640	455	15239	2673	501.25	1950	3	4		V35-5	Andree et al. (1986); Broecker et al. (1988b)	14.6588		1	1	1
7.195	112.077	1953	19669.5	339	TS	17540	260	19280	290	1740	389	16385	2967	393.75	1950	3	4	LGM (19-21.8)	V35-5	Andree et al. (1986); Broecker et al. (1988b)	15.252		1	1	1
7.195	112.077	1953	20268	435	TS	17020	390	19040	460	2020	603	16751	2247	574.75	1950	3	4	LGM (19-21.8)	V35-5	Andree et al. (1986); Broecker et al. (1988b)	15.6898		1	1	1
57.5	-8.4	150	11775.5	68.165	C	10664	65	NaN	NaN	NaN	NaN	10146	528	82.25	443	1	5	YD (11.8-12.7)	MD95-2007	Austin et al. (2011)	389.144		1	1	1
57.5	-8.4	150	12429.5	105.826	C	11353	62	NaN	NaN	NaN	NaN	10362	935	95.5	443	1	5	YD (11.8-12.7)	MD95-2007	Austin et al. (2011)	398.104		1	1	1
57.5	-8.4	150	12482.2	103.763	C	11299	66	NaN	NaN	NaN	NaN	10473	844	106.5	443	1	5	YD (11.8-12.7)	MD95-2007	Austin et al. (2011)	411.552		1	1	1
57.5	-8.4	150	12551.5	103.762	C	11500	90	NaN	NaN	NaN	NaN	10477	988	145.5	443	1	5	YD (11.8-12.7)	MD95-2007	Austin et al. (2011)	393.258		1	1	1
57.5	-8.4	150	12596	98.0994	C	11296	77	NaN	NaN	NaN	NaN	10504	747	153.25	443	1	5	YD (11.8-12.7)	MD95-2007	Austin et al. (2011)	302.187		1	1	1
57.5	-8.4	150	12973.2	71.0856	C	11471	62	NaN	NaN	NaN	NaN	11048	427	85.5	443	1	5	BA (12.8-14.8)	MD95-2007	Austin et al. (2011)	328.816		1	1	1
57.5	-8.4	150	13535.9	139.985	C	12353	74	NaN	NaN	NaN	NaN	11749	660	163.5	443	1	5	BA (12.8-14.8)	MD95-2007	Austin et al. (2011)	413.962		1	1	1
57.5	-8.4	150	13740	137.588	C	12630	100	NaN	NaN	NaN	NaN	11824	747	162.75	443	1	5	BA (12.8-14.8)	MD95-2007	Austin et al. (2011)	385.214		1	1	1
57.5	-8.4	150	14125.5	121.497	C	12790	120	NaN	NaN	NaN	NaN	12250	565	163.5	443	1	5	BA (12.8-14.8)	MD95-2007	Austin et al. (2011)	385.214		1	1	1
13.2	-59.5	150	13100	40	S	NaN	NaN	11670	50	NaN	NaN	11190	497	90.5	331	1	6	BA (12.8-14.8)	RGF 12.16.5#* Barbados	Bard et al. (1990, 1998)	NaN		1	1	1
13.2	-59.5	150	13725	50	S	NaN	NaN	12120	200	NaN	NaN	11800	269	204.5	331	1	6	BA (12.8-14.8)	RGF 12.21.10# Barbados	Bard et al. (1990, 1998)	NaN		1	1	1
13.2	-59.5	150	13680	85	S	NaN	NaN	12110	100	NaN	NaN	11840	283	132.25	331	1	6	BA (12.8-14.8)	RGF 12.21.6 Barbados	Bard et al. (1990, 1998)	NaN		1	1	1
13.2	-59.5	150	30165	80	S	NaN	NaN	26270	205	NaN	NaN	25998	289	242	331	1	6		RGF 12.30.2# Barbados	Bard et al. (1990, 1998)	NaN		1	1	1
13.2	-59.5	150	11570	30	S	NaN	NaN	10380	85	NaN	NaN	10027	349	87	331	1	6		RGF 12.5.2* Barbados	Bard et al. (1990, 1998)	NaN		1	1	1
13.2	-59.5	150	11510	35	S	NaN	NaN	10495	80	NaN	NaN	10057	462	82.25	331	1	6		RGF 12.6.7* Barbados	Bard et al. (1990, 1998)	NaN		1	1	1
13.2	-59.5	150	12245	45	S	NaN	NaN	10620	65	NaN	NaN	10357	231	68.75	331	1	6	YD (11.8-12.7)	RGF 12.9.5* Barbados	Bard et al. (1990, 1998)	NaN		1	1	1
13.2	-59.5	150	9250	30	S	NaN	NaN	8705	60	NaN	NaN	8224	462	69.5	331	1	6	EHOL (7-11)	RGF 7.12.2#* Barbados	Bard et al. (1990, 1998)	NaN		1	1	1
13.2	-59.5	150	9720	25	S	NaN	NaN	9150	85	NaN	NaN	8767	388	87.75	331	1	6	EHOL (7-11)	RGF 7.16.2* Barbados	Bard et al. (1990, 1998)	NaN		1	1	1
13.2	-59.5	150	11075	35	S	NaN	NaN	10110	105	NaN	NaN	9614	507	112.5	331	1	6		RGF 7.27.4 Barbados	Bard et al. (1990, 1998)	NaN		1	1	1
13.2	-59.5	150	7445	40	S	NaN	NaN	7005	75	NaN	NaN	6579	458	101	331	1	6	EHOL (7-11)	RGF 7.4.2 Barbados	Bard et al. (1990, 1998)	NaN		1	1	1
13.2	-59.5	150	8435	25	S	NaN	NaN	8040	80	NaN	NaN	7690	362	89.25	331	1	6	EHOL (7-11)	RGF 7.5.5 Barbados	Bard et al. (1990, 1998)	NaN		1	1	1
13.2	-59.5	150	14665	45	S	NaN	NaN	13020	110	NaN	NaN	12479	561	117.25	331	1	6	BA (12.8-14.8)	RGF 9.13.3#* Barbados	Bard et al. (1990, 1998)	NaN		1	1	1
13.2	-59.5	150	18210	70	S	NaN	NaN	15570	90	NaN	NaN	14859	692	172.25	331	1	6		RGF 9.21.11 Barbados	Bard et al. (1990, 1998)	NaN		1	1	1
13.2	-59.5	150	18860	125	S	NaN	NaN	16420	210	NaN	NaN	15589	838	266.25	331	1	6		RGF 9.24.4 Barbados	Bard et al. (1990, 1998)	NaN		1	1	1
13.2	-59.5	150	18970	35	S	NaN	NaN	16760	110	NaN	NaN	15736	1026	117.5	331	1	6	LGM (19-21.8)	RGF 9.27.5#* Barbados	Bard et al. (1990, 1998)	NaN		1	1	1
13.2	-59.5	150	20570	60	S	NaN	NaN	17630	140	NaN	NaN	17077	566	156.25	331	1	6	LGM (19-21.8)	RGF 9.32.4 Barbados	Bard et al. (1990, 1998)	NaN		1	1	1
13.2	-59.5	150	21935	65	S	NaN	NaN	18810	125	NaN	NaN	17974	829	141.5	331	1	6		RGF 9.34.8#* Barbados	Bard et al. (1990, 1998)	NaN		1	1	1
13.2	-59.5	150	14210	50	S	NaN	NaN	12600	100	NaN	NaN	12308	298	105.25	331	1	6	BA (12.8-14.8)	RGF 9.8.2 Barbados	Bard et al. (1990, 1998)	NaN		1	1	1
13.2	-59.5	150	770	5	S	NaN	NaN	1360	45	NaN	NaN	868	488	45.5	331	1	6	HOL (<6)	RGF B.56#* Barbados	Bard et al. (1990, 1998)	NaN		1	1	1
-21.8	-138.9	150	17680	45	S	NaN	NaN	15135	75	NaN	NaN	14460	669	85.25	542	4	7		Mu 313#* Mururoa	Bard et al. (1998)	NaN		1	1	1
-21.8	-138.9	150	15675	40	S	NaN	NaN	13460	70	NaN	NaN	13078	383	84	542	4	7	HS1 (15-17.5)	Mu 315#* Mururoa	Bard et al. (1998)	NaN		1	1	1
-21.8	-138.9	150	23630	80	S	NaN	NaN	20350	150	NaN	NaN	19411	867	180.25	542	4	7		Mu 8/30 310. Mururoa	Bard et al. (1998)	NaN		1	1	1
-21.8	-138.9	150	17245	30	S	NaN	NaN	14790	60	NaN	NaN	14148	636	75.75	542	4	7	HS1 (15-17.5)	Mu 8/30 315 Mururoa	Bard et al. (1998)	NaN		1	1	1
-17.6	-149.4	150	13577	12	S	NaN	NaN	12169	29	NaN	NaN	11689	473	49.75	530	4	8	BA (12.8-14.8)	310-M0015A-33R-1W 29-40 Tahiti2	Bard et al. (1998), Durand et al. (2013)	NaN		1	1	1
-17.6	-149.4	150	14418	13	S	NaN	NaN	12925	45	NaN	NaN	12397	527	50	530	4	8	BA (12.8-14.8)	310-M0015A-36R-1W 51-52 Tahiti2	Bard et al. (1998), Durand et al. (2013)	NaN		1	1	1
-17.6	-149.4	150	14516	10	S	NaN	NaN	12915	50	NaN	NaN	12428	486	56.25	530	4	8	BA (12.8-14.8)	310-M0015A-36R-2W 0-6 Tahiti2	Bard et al. (1998), Durand et al. (2013)	NaN		1	1	1
-17.6	-149.4	150	14650	11	S	NaN	NaN	12798	28	NaN	NaN	12480	318	38.5	530	4	8	BA (12.8-14.8)	310-M0015A-37R-1W 19-28 Tahiti2	Bard et al. (1998), Durand et al. (2013)	NaN		1	1	1
-17.6	-149.4	150	14555	12	S	NaN	NaN	12801	30	NaN	NaN	12447	353	41.5	530	4	8	BA (12.8-14.8)	310-M0016A-36R-2W 5-10 Tahiti2	Bard et al. (1998), Durand et al. (2013)	NaN		1	1	1
-17.6	-149.4	150	14273	32	S	NaN	NaN	12783	32	NaN	NaN	12328	451	51.25	530	4	8	BA (12.8-14.8)	310-M0018A-18R-1W 40-50 Tahiti2	Bard et al. (1998), Durand et al. (2013)	NaN		1	1	1
-17.6	-149.4	150	14338	14	S	NaN	NaN	12845	40	NaN	NaN	12384	461	52	530	4	8	BA (12.8-14.8)	310-M0018A-19R-1W 107-110 Tahiti2	Bard et al. (1998), Durand et al. (2013)	NaN		1	1	1
-17.6	-149.4	150	11488	14	S	NaN	NaN	10280	35	NaN	NaN	10018	255	42.25	530	4	8		310-M0018A-7R-1W 73-82 Tahiti2	Bard et al. (1998), Durand et al. (2013)	NaN		1	1	1
-17.6	-149.4	150	13724	29	S	NaN	NaN	11995	40	NaN	NaN	11800	165	53.25	530	4	8	BA (12.8-14.8)	310-M0020A-16R-1W 55-66 Tahiti2	Bard et al. (1998), Durand et al. (2013)	NaN		1	1	1
-17.6	-149.4	150	14145	23	S	NaN	NaN	12530	40	NaN	NaN	12258	268	47.25	530	4	8	BA (12.8-14.8)	310-M0020A-21R-2W 13-20 Tahiti2	Bard et al. (1998), Durand et al. (2013)	NaN		1	1	1
-17.6	-149.4	150	14456	30	S	NaN	NaN	12892	31	NaN	NaN	12405	484	40.5	530	4	8	BA (12.8-14.8)	310-M0020A-23R-1W 56-64 Tahiti2	Bard et al. (1998), Durand et al. (2013)	NaN		1	1	1
-17.6	-149.4	150	14734	29	S	NaN	NaN	12815	50	NaN	NaN	12383	417	72.25	530	4	8	BA (12.8-14.8)	310-M0020A-23R-2W 72-78 Tahiti2	Bard et al. (1998), Durand et al. (2013)	NaN		1	1	1
-17.6	-149.4	150	14663	31	S	NaN	NaN	12655	40	NaN	NaN	12479	185	55.75	530	4	8	BA (12.8-14.8)	310-M0020A-24R-2W 38-42 Tahiti2	Bard et al. (1998), Durand et al. (2013)	NaN		1	1	1
-17.6	-149.4	150	14015	14	S	NaN	NaN	12320	50	NaN	NaN	12055	261	65.25	530	4	8	BA (12.8-14.8)	310-M0021A-13R-2W 66-75 Tahiti2	Bard et al. (1998), Durand et al. (2013)	NaN		1	1	1
-17.6	-149.4	150	14350	11	S	NaN	NaN	12975	50	NaN	NaN	12393	582	55.75	530	4	8	BA (12.8-14.8)	310-M0021B-16R-1W 39-44 Tahiti2	Bard et al. (1998), Durand et al. (2013)	NaN		1	1	1
-17.6	-149.4	150	13460	11	S	NaN	NaN	11930	40	NaN	NaN	11584	347	50.5	530	4	8	BA (12.8-14.8)	310-M0023A-11R-1W 22-31 Tahiti2	Bard et al. (1998), Durand et al. (2013)	NaN		1	1	1
-17.6	-149.4	150	13736	9	S	NaN	NaN	12490	40	NaN	NaN	11814	671	48	530	4	8	BA (12.8-14.8)	310-M0023A-12R-1W 140-144 Tahiti2	Bard et al. (1998), Durand et al. (2013)	NaN		1	1	1
-17.6	-149.4	150	13580	10	S	NaN	NaN	12125	28	NaN	NaN	11701	423	48	530	4	8	BA (12.8-14.8)	310-M0023A-12R-1W 32-38 Tahiti2	Bard et al. (1998), Durand et al. (2013)	NaN		1	1	1
-17.6	-149.4	150	14312	19	S	NaN	NaN	12885	50	NaN	NaN	12355	526	67.75	530	4	8	BA (12.8-14.8)	310-M0023A-13R-2W 32-37 Tahiti2	Bard et al. (1998), Durand et al. (2013)	NaN		1	1	1
-17.6	-149.4	150	14588	12	S	NaN	NaN	12750	40	NaN	NaN	12462	287	48.5	530	4	8	BA (12.8-14.8)	310-M0023A-14R-1W 0-20 Tahiti2	Bard et al. (1998), Durand et al. (2013)	NaN		1	1	1
-17.6	-149.4	150	12370	18	S	NaN	NaN	10695	35	NaN	NaN	10369	319	41.75	530	4	8	YD (11.8-12.7)	310-M0023A-5R-1W 45-52 Tahiti2	Bard et al. (1998), Durand et al. (2013)	NaN		1	1	1
-17.6	-149.4	150	13988	8	S	NaN	NaN	12575	35	NaN	NaN	12014	558	51.75	530	4	8	BA (12.8-14.8)	310-M0023B-12R-1W 30-33 Tahiti2	Bard et al. (1998), Durand et al. (2013)	NaN		1	1	1
-17.6	-149.4	150	14278	7	S	NaN	NaN	12800	35	NaN	NaN	12329	469	53	530	4	8	BA (12.8-14.8)	310-M0023B-12R-2W 113-127 Tahiti2	Bard et al. (1998), Durand et al. (2013)	NaN		1	1	1
-17.6	-149.4	150	14284	13	S	NaN	NaN	12939	38	NaN	NaN	12332	605	57.75	530	4	8	BA (12.8-14.8)	310-M0023B-15R-1W 0-5 Tahiti2	Bard et al. (1998), Durand et al. (2013)	NaN		1	1	1
-17.6	-149.4	150	14582	26	S	NaN	NaN	12730	50	NaN	NaN	12459	270	57.5	530	4	8	BA (12.8-14.8)	310-M0024A-10R-1W 65-75 Tahiti2	Bard et al. (1998), Durand et al. (2013)	NaN		1	1	1
-17.6	-149.4	150	14609	13	S	NaN	NaN	12920	70	NaN	NaN	12470	450	74	530	4	8	BA (12.8-14.8)	310-M0024A-10R-1W 98-116 Tahiti2	Bard et al. (1998), Durand et al. (2013)	NaN		1	1	1
-17.6	-149.4	150	14748	13	S	NaN	NaN	12902	31	NaN	NaN	12367	529	51	530	4	8	BA (12.8-14.8)	310-M0024A-10R-2W 69-72 Tahiti2	Bard et al. (1998), Durand et al. (2013)	NaN		1	1	1
-17.6	-149.4	150	14994	13	S	NaN	NaN	13025	40	NaN	NaN	12590	435	55.5	530	4	8	HS1 (15-17.5)	310-M0024A-11R-2W 23-38 Tahiti2	Bard et al. (1998), Durand et al. (2013)	NaN		1	1	1
-17.6	-149.4	150	15147	16	S	NaN	NaN	13116	31	NaN	NaN	12704	411	50	530	4	8	HS1 (15-17.5)	310-M0024A-13R-1W 32-41 Tahiti2	Bard et al. (1998), Durand et al. (2013)	NaN		1	1	1
-17.6	-149.4	150	15232	16	S	NaN	NaN	13385	45	NaN	NaN	12768	616	58.5	530	4	8	HS1 (15-17.5)	310-M0024A-14R-1W 24-28 Tahiti2	Bard et al. (1998), Durand et al. (2013)	NaN		1	1	1
-17.6	-149.4	150	15744	15	S	NaN	NaN	13700	40	NaN	NaN	13130	568	58	530	4	8	HS1 (15-17.5)	310-M0024A-15R-1W 16-20 Tahiti2	Bard et al. (1998), Durand et al. (2013)	NaN		1	1	1
-17.6	-149.4	150	14478	12	S	NaN	NaN	12893	29	NaN	NaN	12413	479	38.75	530	4	8	BA (12.8-14.8)	310-M0025A-10R-1W 40-46 Tahiti2	Bard et al. (1998), Durand et al. (2013)	NaN		1	1	1
-17.6	-149.4	150	14901	11	S	NaN	NaN	12910	60	NaN	NaN	12510	398	65.5	530	4	8		310-M0025B-10R-1W 0-5 Tahiti2	Bard et al. (1998), Durand et al. (2013)	NaN		1	1	1
-17.6	-149.4	150	15310	11	S	NaN	NaN	13410	60	NaN	NaN	12846	563	73	530	4	8	HS1 (15-17.5)	310-M0025B-11R-1W 70-74 Tahiti2	Bard et al. (1998), Durand et al. (2013)	NaN		1	1	1
-17.6	-149.4	150	14801	16	S	NaN	NaN	13009	18	NaN	NaN	12416	591	53	530	4	8	BA (12.8-14.8)	310-M0025B-9R-2W 60-70 Tahiti2	Bard et al. (1998), Durand et al. (2013)	NaN		1	1	1
-17.6	-149.4	150	14853	15	S	NaN	NaN	13080	80	NaN	NaN	12489	592	85.75	530	4	8		310-M0026A-5R-1W 117-127 Tahiti2	Bard et al. (1998), Durand et al. (2013)	NaN		1	1	1
-17.6	-149.4	150	14720	12	S	NaN	NaN	12935	45	NaN	NaN	12408	526	68	530	4	8	BA (12.8-14.8)	310-M0026A-5R-1W 4-18 Tahiti2	Bard et al. (1998), Durand et al. (2013)	NaN		1	1	1
-17.6	-149.4	150	11033	8	S	NaN	NaN	9885	35	NaN	NaN	9562.8	320	42	530	4	8		310-M005A-12R-1W 51-54 Tahiti2	Bard et al. (1998), Durand et al. (2013)	NaN		1	1	1
-17.6	-149.4	150	11837	7	S	NaN	NaN	10370	35	NaN	NaN	10204	169	43	530	4	8	YD (11.8-12.7)	310-M005C-11R-1W 46-59 Tahiti2	Bard et al. (1998), Durand et al. (2013)	NaN		1	1	1
-17.6	-149.4	150	12430	14	S	NaN	NaN	10780	35	NaN	NaN	10363	418	42.75	530	4	8	YD (11.8-12.7)	310-M005D-2R-1W 107-115 Tahiti2	Bard et al. (1998), Durand et al. (2013)	NaN		1	1	1
-17.6	-149.4	150	13163	22	S	NaN	NaN	11545	35	NaN	NaN	11264	268	58.75	530	4	8	BA (12.8-14.8)	310-M005D-5R-2W 0-5 Tahiti2	Bard et al. (1998), Durand et al. (2013)	NaN		1	1	1
-17.6	-149.4	150	13784	15	S	NaN	NaN	12230	40	NaN	NaN	11899	317	61.75	530	4	8	BA (12.8-14.8)	310-M005D-6R-2W 0-5 Tahiti2	Bard et al. (1998), Durand et al. (2013)	NaN		1	1	1
-17.6	-149.4	150	10029	9	S	NaN	NaN	9175	30	NaN	NaN	8884.4	283	36.75	530	4	8	EHOL (7-11)	310-M007A-18R-1W 76-90 Tahiti2	Bard et al. (1998), Durand et al. (2013)	NaN		1	1	1
-17.6	-149.4	150	14239	17	S	NaN	NaN	12550	60	NaN	NaN	12320	230	63.25	530	4	8	BA (12.8-14.8)	310-M009A-6R-1W 38-48 Tahiti2	Bard et al. (1998), Durand et al. (2013)	NaN		1	1	1
-17.6	-149.4	150	14519	10	S	NaN	NaN	12930	50	NaN	NaN	12430	499	56.25	530	4	8	BA (12.8-14.8)	310-M009B-13R-1W 11-18 Tahiti2	Bard et al. (1998), Durand et al. (2013)	NaN		1	1	1
-17.6	-149.4	150	15146	12	S	NaN	NaN	13160	50	NaN	NaN	12703	456	62.5	530	4	8	HS1 (15-17.5)	310-M009B-14R-1W 22-25 Tahiti2	Bard et al. (1998), Durand et al. (2013)	NaN		1	1	1
-17.6	-149.4	150	16087	21	S	NaN	NaN	13880	50	NaN	NaN	13372	508	60.25	530	4	8	HS1 (15-17.5)	310-M009B-15R-1W 13-20 Tahiti2	Bard et al. (1998), Durand et al. (2013)	NaN		1	1	1
-17.6	-149.4	150	29631	31	S	NaN	NaN	25970	100	NaN	NaN	25293	675	114.25	530	4	8	preLGM (25-30)	310-M009B-16R-2W 13-17 Tahiti2	Bard et al. (1998), Durand et al. (2013)	NaN		1	1	1
-17.6	-149.4	150	14348	11	S	NaN	NaN	12632	31	NaN	NaN	12392	240	41	530	4	8	BA (12.8-14.8)	310-M009B-9R-2W 0-5 Tahiti2	Bard et al. (1998), Durand et al. (2013)	NaN		1	1	1
-17.6	-149.4	150	15512	13	S	NaN	NaN	13610	50	NaN	NaN	12943	665	65.75	530	4	8	HS1 (15-17.5)	310-M009C-17R-2W 0-10 Tahiti2	Bard et al. (1998), Durand et al. (2013)	NaN		1	1	1
-17.6	-149.4	150	13848	15	S	NaN	NaN	12300	50	NaN	NaN	12013	279	56	530	4	8	BA (12.8-14.8)	310-M009C-6R-1W 38-43 Tahiti2	Bard et al. (1998), Durand et al. (2013)	NaN		1	1	1
-17.6	-149.4	150	14793	13	S	NaN	NaN	13038	31	NaN	NaN	12402	634	56.5	530	4	8	BA (12.8-14.8)	310-M009D-10R-2W 96-107 Tahiti2	Bard et al. (1998), Durand et al. (2013)	NaN		1	1	1
-17.6	-149.4	150	14912	13	S	NaN	NaN	12985	40	NaN	NaN	12515	468	49.75	530	4	8		310-M009D-11R-1W 13-20 Tahiti2	Bard et al. (1998), Durand et al. (2013)	NaN		1	1	1
-17.6	-149.4	150	29209	25	S	NaN	NaN	25530	110	NaN	NaN	25053	474	149	530	4	8	preLGM (25-30)	310-M009D-14R-2W 81-90 Tahiti2	Bard et al. (1998), Durand et al. (2013)	NaN		1	1	1
-17.6	-149.4	150	30195	28	S	NaN	NaN	26050	100	NaN	NaN	26026	24	122.25	530	4	8		310-M009D-18R-1W 19-28 Tahiti2	Bard et al. (1998), Durand et al. (2013)	NaN		1	1	1
-17.6	-149.4	150	14221	28	S	NaN	NaN	12680	40	NaN	NaN	12312	369	47.25	530	4	8	BA (12.8-14.8)	310-M009D-7R-1W 11-28 Tahiti2	Bard et al. (1998), Durand et al. (2013)	NaN		1	1	1
-17.6	-149.4	150	14490	17	S	NaN	NaN	12840	50	NaN	NaN	12417	421	56	530	4	8	BA (12.8-14.8)	310-M009D-9R-1W 66-77 Tahiti2	Bard et al. (1998), Durand et al. (2013)	NaN		1	1	1
-17.6	-149.4	150	14531	23	S	NaN	NaN	12950	45	NaN	NaN	12435	513	53.25	530	4	8	BA (12.8-14.8)	310-M009D-9R-1W 99-103 Tahiti2	Bard et al. (1998), Durand et al. (2013)	NaN		1	1	1
-17.6	-149.4	150	14116	21	S	NaN	NaN	12585	50	NaN	NaN	12246	344	57.25	530	4	8	BA (12.8-14.8)	310-M009E-7R-1W 5-13 Tahiti2	Bard et al. (1998), Durand et al. (2013)	NaN		1	1	1
-17.6	-149.4	150	14359	20	S	NaN	NaN	12845	40	NaN	NaN	12397	451	47.75	530	4	8	BA (12.8-14.8)	310-M009E-9R-1W 32-36 Tahiti2	Bard et al. (1998), Durand et al. (2013)	NaN		1	1	1
-17.6	-149.4	150	14769	19	S	NaN	NaN	12775	40	NaN	NaN	12369	396	58.25	530	4	8	BA (12.8-14.8)	310-M009E-9R-1W 69-73 Tahiti2	Bard et al. (1998), Durand et al. (2013)	NaN		1	1	1
-17.6	-149.4	150	9625	10	S	NaN	NaN	8710	70	NaN	NaN	8701	6	72	530	4	8	EHOL (7-11)	Ta-P6-10# Tahiti1	Bard et al. (1998), Durand et al. (2013)	NaN		1	1	1
-17.6	-149.4	150	9890	20	S	NaN	NaN	9090	60	NaN	NaN	8805	271	70.25	530	4	8	EHOL (7-11)	Ta-P6-11# Tahiti1	Bard et al. (1998), Durand et al. (2013)	NaN		1	1	1
-17.6	-149.4	150	9980	25	S	NaN	NaN	9100	60	NaN	NaN	8921	204	64.75	530	4	8	EHOL (7-11)	Ta-P6-12 Tahiti1	Bard et al. (1998), Durand et al. (2013)	NaN		1	1	1
-17.6	-149.4	150	10260	20	S	NaN	NaN	9290	60	NaN	NaN	9173	136	75.5	530	4	8	EHOL (7-11)	Ta-P6-13# Tahiti1	Bard et al. (1998), Durand et al. (2013)	NaN		1	1	1
-17.6	-149.4	150	10180	35	S	NaN	NaN	9365	50	NaN	NaN	8959	398	82.75	530	4	8	EHOL (7-11)	Ta-P6-14* Tahiti1	Bard et al. (1998), Durand et al. (2013)	NaN		1	1	1
-17.6	-149.4	150	8570	15	S	NaN	NaN	8130	100	NaN	NaN	7782	345	101.5	530	4	8	EHOL (7-11)	Ta-P7-1# Tahiti1	Bard et al. (1998), Durand et al. (2013)	NaN		1	1	1
-17.6	-149.4	150	12005	30	S	NaN	NaN	10580	70	NaN	NaN	10320	273	73	530	4	8	YD (11.8-12.7)	Ta-P7-10 Tahiti1	Bard et al. (1998), Durand et al. (2013)	NaN		1	1	1
-17.6	-149.4	150	12950	25	S	NaN	NaN	11230	45	NaN	NaN	11037	189	49.75	530	4	8	BA (12.8-14.8)	Ta-P7-11 Tahiti1	Bard et al. (1998), Durand et al. (2013)	NaN		1	1	1
-17.6	-149.4	150	12875	25	S	NaN	NaN	11130	45	NaN	NaN	10961	150	53.75	530	4	8	BA (12.8-14.8)	Ta-P7-12 Tahiti1	Bard et al. (1998), Durand et al. (2013)	NaN		1	1	1
-17.6	-149.4	150	12775	40	S	NaN	NaN	11310	80	NaN	NaN	10912	435	116.5	530	4	8	BA (12.8-14.8)	Ta-P7-13 Tahiti1	Bard et al. (1998), Durand et al. (2013)	NaN		1	1	1
-17.6	-149.4	150	12785	30	S	NaN	NaN	11390	80	NaN	NaN	10913	494	97.75	530	4	8	BA (12.8-14.8)	Ta-P7-14 Tahiti1	Bard et al. (1998), Durand et al. (2013)	NaN		1	1	1
-17.6	-149.4	150	12945	30	S	NaN	NaN	11330	80	NaN	NaN	11041	293	82.5	530	4	8	BA (12.8-14.8)	Ta-P7-15 Tahiti1	Bard et al. (1998), Durand et al. (2013)	NaN		1	1	1
-17.6	-149.4	150	12980	30	S	NaN	NaN	11390	80	NaN	NaN	11047	340	81.25	530	4	8	BA (12.8-14.8)	Ta-P7-16 Tahiti1	Bard et al. (1998), Durand et al. (2013)	NaN		1	1	1
-17.6	-149.4	150	13145	25	S	NaN	NaN	11730	100	NaN	NaN	11230	476	109	530	4	8	BA (12.8-14.8)	Ta-P7-17 Tahiti1	Bard et al. (1998), Durand et al. (2013)	NaN		1	1	1
-17.6	-149.4	150	13540	25	S	NaN	NaN	11930	110	NaN	NaN	11741	223	116.5	530	4	8	BA (12.8-14.8)	Ta-P7-18# Tahiti1	Bard et al. (1998), Durand et al. (2013)	NaN		1	1	1
-17.6	-149.4	150	13830	20	S	NaN	NaN	12090	110	NaN	NaN	12018	77	112.75	530	4	8	BA (12.8-14.8)	Ta-P7-19# Tahiti1	Bard et al. (1998), Durand et al. (2013)	NaN		1	1	1
-17.6	-149.4	150	9310	20	S	NaN	NaN	8470	90	NaN	NaN	8314	156	94.75	530	4	8	EHOL (7-11)	Ta-P7-2# Tahiti1	Bard et al. (1998), Durand et al. (2013)	NaN		1	1	1
-17.6	-149.4	150	10315	25	S	NaN	NaN	9270	70	NaN	NaN	9213	70	73	530	4	8	EHOL (7-11)	Ta-P7-4 Tahiti1	Bard et al. (1998), Durand et al. (2013)	NaN		1	1	1
-17.6	-149.4	150	10640	30	S	NaN	NaN	9630	70	NaN	NaN	9381	217	75.25	530	4	8	EHOL (7-11)	Ta-P7-5 Tahiti1	Bard et al. (1998), Durand et al. (2013)	NaN		1	1	1
-17.6	-149.4	150	10915	30	S	NaN	NaN	9850	70	NaN	NaN	9627	239	75	530	4	8	EHOL (7-11)	Ta-P7-6 Tahiti1	Bard et al. (1998), Durand et al. (2013)	NaN		1	1	1
-17.6	-149.4	150	11070	10	S	NaN	NaN	9880	70	NaN	NaN	9593	290	77	530	4	8		Ta-P7-7# Tahiti1	Bard et al. (1998), Durand et al. (2013)	NaN		1	1	1
-17.6	-149.4	150	11345	20	S	NaN	NaN	10160	45	NaN	NaN	9967	194	52.5	530	4	8		Ta-P7-8 Tahiti1	Bard et al. (1998), Durand et al. (2013)	NaN		1	1	1
-17.6	-149.4	150	11565	20	S	NaN	NaN	10330	50	NaN	NaN	10026	303	54.25	530	4	8		Ta-P7-9 Tahiti1	Bard et al. (1998), Durand et al. (2013)	NaN		1	1	1
-17.6	-149.4	150	12955	30	S	NaN	NaN	11480	45	NaN	NaN	11036	439	50.5	530	4	8	BA (12.8-14.8)	Ta-P8-1 Tahiti1	Bard et al. (1998), Durand et al. (2013)	NaN		1	1	1
-17.6	-149.4	150	13400	25	S	NaN	NaN	12030	40	NaN	NaN	11514	505	49.5	530	4	8	BA (12.8-14.8)	Ta-P8-2 Tahiti1	Bard et al. (1998), Durand et al. (2013)	NaN		1	1	1
-17.6	-149.4	150	13755	35	S	NaN	NaN	12260	45	NaN	NaN	11850	397	78	530	4	8	BA (12.8-14.8)	Ta-P8-3 Tahiti1	Bard et al. (1998), Durand et al. (2013)	NaN		1	1	1
-17.6	-149.4	150	13930	30	S	NaN	NaN	12490	45	NaN	NaN	12036	454	57.25	530	4	8	BA (12.8-14.8)	Ta-P8-4 Tahiti1	Bard et al. (1998), Durand et al. (2013)	NaN		1	1	1
-41.1	7.8	4981	12201	200	C	10900	45	11500	140	600	147	10406	1137	164.5	1602	8	9	YD (11.8-12.7)	TNO57-21	Barker et al. (2010)	9.83526		1	1	1
-41.1	7.8	4981	12980	200	C	12200	75	12350	75	150	106	11047	1296	256	1602	8	9	BA (12.8-14.8)	TNO57-21	Barker et al. (2010)	10.0154		1	1	1
-41.1	7.8	4981	13580	200	C	12700	55	13050	60	350	81	11701	1304	203.75	1602	8	9	BA (12.8-14.8)	TNO57-21	Barker et al. (2010)	10.3093		1	1	1
-41.1	7.8	4981	14180	200	C	12950	55	13700	75	750	93	12287	1426	157.5	1602	8	9	BA (12.8-14.8)	TNO57-21	Barker et al. (2010)	10.5783		1	1	1
-41.1	7.8	4981	14770	200	C	13150	70	13700	170	550	184	12370	1221	192.75	1602	8	9	BA (12.8-14.8)	TNO57-21	Barker et al. (2010)	10.8328		1	1	1
-41.1	7.8	4981	15892	200	C	14750	65	15750	65	1000	92	13239	2509	157.25	1602	8	9	HS1 (15-17.5)	TNO57-21	Barker et al. (2010)	11.3265		1	1	1
-41.1	7.8	4981	16453	200	C	14850	60	15900	70	1050	92	13628	2270	149.25	1602	8	9	HS1 (15-17.5)	TNO57-21	Barker et al. (2010)	11.548		1	1	1
-41.1	7.8	4981	17014	200	C	15650	80	16700	90	1050	120	13966	2711	179.25	1602	8	9	HS1 (15-17.5)	TNO57-21	Barker et al. (2010)	11.755		1	1	1
-41.1	7.8	4981	17575	200	C	16050	65	17050	90	1000	111	14464	2610	165.25	1602	8	9	HS1 (15-17.5)	TNO57-21	Barker et al. (2010)	11.9488		1	1	1
-41.1	7.8	4981	18697	200	C	16900	80	18100	110	1200	136	15352	2741	240.5	1602	8	9		TNO57-21	Barker et al. (2010)	12.3014		1	1	1
-41.1	7.8	4981	19259	200	C	17400	70	18250	80	850	106	15975	2286	199.5	1602	8	9	LGM (19-21.8)	TNO57-21	Barker et al. (2010)	12.4617		1	1	1
-41.1	7.8	4981	19820	200	C	18000	85	18700	130	700	155	16376	2272	204.25	1602	8	9	LGM (19-21.8)	TNO57-21	Barker et al. (2010)	12.6135		1	1	1
-41.1	7.8	4981	21503	200	C	NaN	NaN	19800	120	NaN	NaN	17811	2049	169	1602	8	9	LGM (19-21.8)	TNO57-21	Barker et al. (2010)	NaN		1	1	1
-41.1	7.8	4981	22064	200	C	19300	90	20800	120	1500	150	18110	2686	230.25	1602	8	9		TNO57-21	Barker et al. (2010)	13.1436		1	1	1
3.89	78.06	3166	2103	322	NA	2523	108	3232	45	709	117	2117	1093	252	1989	5	10	HOL (<6)	SS152	Bharti et al. (2022)	1.42653	Low sed rate <2cm/kyr	0	1	0
3.89	78.06	3166	2860	336	NA	3164	45	3639	54	475	70	2771	859	251	1989	5	10	HOL (<6)	SS152	Bharti et al. (2022)	1.3986	Low sed rate <2cm/kyr	0	1	0
3.89	78.06	3166	5761	275	NA	5547	35	5625	28	78	45	5073.4	591	214	1989	5	10	HOL (<6)	SS152	Bharti et al. (2022)	1.56223	Low sed rate <2cm/kyr	0	1	0
3.89	78.06	3166	6468	170	NA	6190	75	6360	65	170	99	5688.6	667	178	1989	5	10		SS152	Bharti et al. (2022)	1.85529	Low sed rate <2cm/kyr	0	1	0
3.89	78.06	3166	7523	250	NA	7158	42	8332	25	1174	49	6678.2	1692	267	1989	5	10	EHOL (7-11)	SS152	Bharti et al. (2022)	2.12681	Low sed rate <2cm/kyr	1	1	0
3.89	78.06	3166	8813	213	NA	8405	45	8998	78	593	90	7991.8	1037	178	1989	5	10	EHOL (7-11)	SS152	Bharti et al. (2022)	2.04244	Low sed rate <2cm/kyr	1	1	0
3.89	78.06	3166	9278	323	NA	8715	47	10519	52	1804	70	8266.6	2234	176	1989	5	10	EHOL (7-11)	SS152	Bharti et al. (2022)	2.04786	Low sed rate <2cm/kyr	1	1	0
3.89	78.06	3166	11897	326	NA	10708	87	13122	79	2414	118	10226	2896	177	1989	5	10	YD (11.8-12.7)	SS152	Bharti et al. (2022)	1.84921	Low sed rate <2cm/kyr	0	1	0
3.89	78.06	3166	12462	112	NA	11081	34	13489	50	2408	60	10401	3052	94	1989	5	10	YD (11.8-12.7)	SS152	Bharti et al. (2022)	1.92585	Low sed rate <2cm/kyr	0	1	0
3.89	78.06	3166	12697	194	NA	11176	94	13496	49	2320	106	10653	2819	202	1989	5	10		SS152	Bharti et al. (2022)	2.04773	Low sed rate <2cm/kyr	0	1	0
3.89	78.06	3166	14026	345	NA	12551	60	16335	101	3784	117	12077	4198	267	1989	5	10	BA (12.8-14.8)	SS152	Bharti et al. (2022)	1.99629	Low sed rate <2cm/kyr	0	1	0
3.89	78.06	3166	14917	228	NA	13119	49	16251	53	3132	72	12517	3714	146	1989	5	10		SS152	Bharti et al. (2022)	1.94409	Low sed rate <2cm/kyr	0	1	0
3.89	78.06	3166	15758	191	NA	13678	37	18825	57	5147	68	13142	5681	147	1989	5	10	HS1 (15-17.5)	SS152	Bharti et al. (2022)	2.09417	Low sed rate <2cm/kyr	1	1	0
3.89	78.06	3166	16610	209	NA	14369	76	19904	86	5535	115	13733	6175	160	1989	5	10	HS1 (15-17.5)	SS152	Bharti et al. (2022)	2.10716	Low sed rate <2cm/kyr	1	1	0
3.89	78.06	3166	17165	209	NA	14812	42	19831	110	5019	118	14159	5707	206	1989	5	10	HS1 (15-17.5)	SS152	Bharti et al. (2022)	2.09729	Low sed rate <2cm/kyr	1	1	0
3.89	78.06	3166	18000	297	NA	15495	38	19921	85	4426	93	14683	5238	261	1989	5	10		SS152	Bharti et al. (2022)	2.05556	Low sed rate <2cm/kyr	0	1	0
3.89	78.06	3166	18928	385	NA	16453	199	20483	107	4030	226	15691	4793	384	1989	5	10	LGM (19-21.8)	SS152	Bharti et al. (2022)	2.00761	Low sed rate <2cm/kyr	1	1	0
6.03	89.94	2788	6091	372	NA	5823	40	6823	48	1000	62	5276.4	1503	341	1919	5	11	HOL (<6)	SS172	Bharti et al. (2022)	0.49253	Low sed rate <2cm/kyr	0	1	0
6.03	89.94	2788	7633	382	NA	7317	59	8023	60	706	84	6798.6	1204	388	1919	5	11	EHOL (7-11)	SS172	Bharti et al. (2022)	0.65505	Low sed rate <2cm/kyr	0	1	0
6.03	89.94	2788	9347	369	NA	8797	33	10699	67	1902	75	8340.8	2363	279	1919	5	11	EHOL (7-11)	SS172	Bharti et al. (2022)	0.85589	Low sed rate <2cm/kyr	0	1	0
6.03	89.94	2788	11474	269	NA	10438	52	12440	63	2002	82	10018	2428	195	1919	5	11		SS172	Bharti et al. (2022)	1.04584	Low sed rate <2cm/kyr	0	1	0
6.03	89.94	2788	12094	167	NA	10789	46	13639	36	2850	58	10332	3301	87	1919	5	11	YD (11.8-12.7)	SS172	Bharti et al. (2022)	1.1576	Low sed rate <2cm/kyr	0	1	0
6.03	89.94	2788	12667	200	NA	11296	74	13553	42	2257	85	10594	2925	117	1919	5	11		SS172	Bharti et al. (2022)	1.18418	Low sed rate <2cm/kyr	0	1	0
6.03	89.94	2788	13643	177	NA	12271	61	15028	52	2757	80	11808	3227	177	1919	5	11	BA (12.8-14.8)	SS172	Bharti et al. (2022)	1.31936	Low sed rate <2cm/kyr	0	1	0
6.03	89.94	2788	14174	127	NA	12804	65	15722	54	2918	85	12281	3447	121	1919	5	11	BA (12.8-14.8)	SS172	Bharti et al. (2022)	1.41103	Low sed rate <2cm/kyr	0	1	0
6.03	89.94	2788	14370	139	NA	12672	48	15672	61	3000	78	12398	3293	91	1919	5	11	BA (12.8-14.8)	SS172	Bharti et al. (2022)	1.46138	Low sed rate <2cm/kyr	0	1	0
6.03	89.94	2788	14986	252	NA	13110	51	17048	85	3938	99	12581	4462	176	1919	5	11		SS172	Bharti et al. (2022)	1.53477	Low sed rate <2cm/kyr	0	1	0
6.03	89.94	2788	15946	437	NA	14283	57	18610	71	4327	91	13266	5323	303	1919	5	11	HS1 (15-17.5)	SS172	Bharti et al. (2022)	1.50508	Low sed rate <2cm/kyr	0	1	0
6.03	89.94	2788	16680	548	NA	13628	59	18719	101	5091	117	13780	4939	390	1919	5	11	HS1 (15-17.5)	SS172	Bharti et al. (2022)	1.4988	Low sed rate <2cm/kyr	0	1	0
6.03	89.94	2788	17724	542	NA	15469	66	19189	63	3720	91	14467	4669	432	1919	5	11	HS1 (15-17.5)	SS172	Bharti et al. (2022)	1.46694	Low sed rate <2cm/kyr	0	1	0
6.03	89.94	2788	18290	541	NA	15093	57	19991	73	4898	93	15108	4913	473	1919	5	11		SS172	Bharti et al. (2022)	1.47622	Low sed rate <2cm/kyr	0	1	0
6.03	89.94	2788	19139	497	NA	17263	75	20179	90	2916	117	15877	4286	449	1919	5	11	LGM (19-21.8)	SS172	Bharti et al. (2022)	1.46298	Low sed rate <2cm/kyr	0	1	0
6.03	89.94	2788	19658	401	NA	16890	67	20220	66	3330	94	16382	3890	330	1919	5	11	LGM (19-21.8)	SS172	Bharti et al. (2022)	1.47523	Low sed rate <2cm/kyr	0	1	0
6.03	89.94	2788	20849	426	NA	19050	78	21909	62	2859	100	17250	4624	327	1919	5	11	LGM (19-21.8)	SS172	Bharti et al. (2022)	1.43892	Low sed rate <2cm/kyr	0	1	0
6.03	89.94	2788	21745	412	NA	18587	80	21820	96	3233	125	17834	3940	345	1919	5	11	LGM (19-21.8)	SS172	Bharti et al. (2022)	1.4716	Low sed rate <2cm/kyr	0	1	0
6.03	89.94	2788	24039	359	NA	21020	135	24698	132	3678	189	20034	4649	340	1919	5	11		SS172	Bharti et al. (2022)	1.41437	Low sed rate <2cm/kyr	0	1	0
6.03	89.94	2788	24466	230	NA	21088	76	24797	114	3709	137	20352	4418	202	1919	5	11		SS172	Bharti et al. (2022)	1.47143	Low sed rate <2cm/kyr	0	1	0
6.03	89.94	2788	26518	286	NA	23147	87	27732	77	4585	116	22428	5412	243	1919	5	11	preLGM (25-30)	SS172	Bharti et al. (2022)	1.50841	Low sed rate <2cm/kyr	0	1	0
6.03	89.94	2788	27600	290	NA	24289	87	29832	85	5543	122	23302	6468	384	1919	5	11	preLGM (25-30)	SS172	Bharti et al. (2022)	1.5942	Low sed rate <2cm/kyr	0	1	0
6.03	89.94	2788	28849	909	NA	23883	120	29158	134	5275	180	24639	4458	897	1919	5	11	preLGM (25-30)	SS172	Bharti et al. (2022)	1.59451	Low sed rate <2cm/kyr	0	1	0
6.03	89.94	2788	32962	592	NA	29376	79	32069	112	2693	137	28541	3451	416	1919	5	11		SS172	Bharti et al. (2022)	1.5169	Low sed rate <2cm/kyr	0	1	0
6.03	89.94	2788	35868	295	NA	32247	91	35841	180	3594	202	31438	4363	380	1919	5	11		SS172	Bharti et al. (2022)	1.56128	Low sed rate <2cm/kyr	0	1	0
6.03	89.94	2788	37062	299	NA	33215	166	38074	208	4859	266	32749	5338	340	1919	5	11		SS172	Bharti et al. (2022)	1.72684	Low sed rate <2cm/kyr	0	1	0
-3.74917	-81.1342	373	1074	46	TS	1680	40	1960	20	280	45	1193	786	44	933	4	12	HOL (<6)	CDH 23	Bova et al. (2018)	27.933		1	1	1
-3.74917	-81.1342	373	3116	47	TS	3420	35	3330	25	-90	43	2959	379	42.5	933	4	12	HOL (<6)	CDH 23	Bova et al. (2018)	51.3479	Negative B-P	0	0	0
-3.74917	-81.1342	373	3801	46	TS	3980	35	4290	25	310	43	3470	782	47.75	933	4	12	HOL (<6)	CDH 23	Bova et al. (2018)	68.5346		1	1	1
-3.74917	-81.1342	373	4538	56	TS	4540	40	4660	25	120	47	4090	591	54.25	933	4	12	HOL (<6)	CDH 23	Bova et al. (2018)	77.2367		1	1	1
-3.74917	-81.1342	373	4538	57	TS	4540	40	4730	20	190	45	4090	660	52.25	933	4	12	HOL (<6)	CDH 23	Bova et al. (2018)	77.2367		1	1	1
-3.74917	-81.1342	373	5921	28	TS	5720	30	6370	50	650	58	5167	1206	77	933	4	12	HOL (<6)	CDH 23	Bova et al. (2018)	84.4452		1	1	1
-3.74917	-81.1342	373	6460	39	TS	6230	35	6380	50	150	61	5693	695	66.5	933	4	12		CDH 23	Bova et al. (2018)	85.1393		1	1	1
-3.74917	-81.1342	373	6781	52	TS	6510	45	6850	25	340	51	5947	888	54.25	933	4	12		CDH 23	Bova et al. (2018)	88.4825		1	1	1
-3.74917	-81.1342	373	9048	56	TS	8600	45	8990	30	390	54	8178.2	842	80.25	933	4	12	EHOL (7-11)	CDH 23	Bova et al. (2018)	99.4695		1	1	1
-3.74917	-81.1342	373	9793	98	TS	9220	60	9510	30	290	67	8803.6	720	64.75	933	4	12	EHOL (7-11)	CDH 23	Bova et al. (2018)	102.139		1	1	1
-3.74917	-81.1342	373	10744	74	TS	9920	40	10150	35	230	53	9506.2	639	73.75	933	4	12	EHOL (7-11)	CDH 23	Bova et al. (2018)	102.383		1	1	1
-3.74917	-81.1342	373	11950	70	TS	10750	45	10950	45	200	64	10281	687	68.75	933	4	12	YD (11.8-12.7)	CDH 23	Bova et al. (2018)	102.929		1	1	1
-3.74917	-81.1342	373	12975	57	TS	11650	55	11650	35	0	65	11048	604	53.25	933	4	12	BA (12.8-14.8)	CDH 23	Bova et al. (2018)	104.855		1	1	1
-3.74917	-81.1342	373	12976	57	TS	11650	55	11500	40	-150	68	11048	454	56.75	933	4	12	BA (12.8-14.8)	CDH 23	Bova et al. (2018)	104.847	Negative B-P	0	0	0
-3.74917	-81.1342	373	13321	60	TS	12000	55	12200	45	200	71	11466	747	80	933	4	12	BA (12.8-14.8)	CDH 23	Bova et al. (2018)	108.1		1	1	1
-3.74917	-81.1342	373	13536	82	TS	12200	70	12350	40	150	81	11749	655	102.75	933	4	12	BA (12.8-14.8)	CDH 23	Bova et al. (2018)	110.816		1	1	1
-3.74917	-81.1342	373	14375	171	TS	12800	95	12950	45	150	105	12398	569	95.25	933	4	12	BA (12.8-14.8)	CDH 23	Bova et al. (2018)	118.261		1	1	1
-3.986	-81.3087	1023	7378	31	TS	7070	35	7620	40	550	53	6459.8	1170	56.75	1513	4	13	EHOL (7-11)	CDH 26	Bova et al. (2018)	31.9192		1	1	1
-3.986	-81.3087	1023	10153	44	TS	9460	40	9840	45	380	60	8917.2	914	78.75	1513	4	13	EHOL (7-11)	CDH 26	Bova et al. (2018)	41.4656		1	1	1
-3.986	-81.3087	1023	11948	69	TS	10750	45	11700	55	950	71	10277	1439	75.5	1513	4	13	YD (11.8-12.7)	CDH 26	Bova et al. (2018)	48.0415		1	1	1
-3.986	-81.3087	1023	12978	48	TS	11650	45	12400	40	750	60	11047	1352	50.5	1513	4	13	BA (12.8-14.8)	CDH 26	Bova et al. (2018)	51.0865		1	1	1
-3.986	-81.3087	1023	13705	58	TS	12350	50	13500	75	1150	90	11827	1661	95.75	1513	4	13	BA (12.8-14.8)	CDH 26	Bova et al. (2018)	57.2419		1	1	1
-3.986	-81.3087	1023	14913	84	TS	13100	60	14200	90	1100	108	12515	1677	115.25	1513	4	13		CDH 26	Bova et al. (2018)	62.9987		1	1	1
-3.986	-81.3087	1023	15955	80	TS	13900	60	14800	65	900	88	13272	1520	90.25	1513	4	13	HS1 (15-17.5)	CDH 26	Bova et al. (2018)	72.4851		1	1	1
-3.986	-81.3087	1023	17513	90	TS	15150	65	16000	60	850	88	14448	1568	98	1513	4	13	HS1 (15-17.5)	CDH 26	Bova et al. (2018)	79.9692		1	1	1
-3.986	-81.3087	1023	19675	85	TS	17050	70	18050	70	1000	99	16384	1702	105	1513	4	13	LGM (19-21.8)	CDH 26	Bova et al. (2018)	88.4879		1	1	1
-3.986	-81.3087	1023	20460	82	TS	17700	70	18950	100	1250	122	16917	2020	139.25	1513	4	13	LGM (19-21.8)	CDH 26	Bova et al. (2018)	92.6197		1	1	1
-3.986	-81.3087	1023	21928	123	TS	18850	110	19700	90	850	142	17968	1721	142.5	1513	4	13		CDH 26	Bova et al. (2018)	93.3966		1	1	1
-3.986	-81.3087	1023	24098	96	TS	20900	80	22300	160	1400	179	20056	2222	185.25	1513	4	13		CDH 26	Bova et al. (2018)	99.0124		1	1	1
-1.26567	-89.698	595	10323	118	TS	9580	50	9560	50	-20	71	9196.4	369	129.25	1105	4	14	EHOL (7-11)	CDH41	Bova et al. (2018)	0.0242178	Extreme depletions (Negative B-P), Low sed rate <2cm/kyr	0	0	0
-1.26567	-89.698	595	11558	129	TS	10500	45	11900	50	1400	67	10026	1859	76	1105	4	14		CDH41	Bova et al. (2018)	0.389341	Extreme depletions, Low sed rate <2cm/kyr	0	0	0
-1.26567	-89.698	595	13427	130	TS	12150	100	14900	70	2750	122	11539	3338	158	1105	4	14	BA (12.8-14.8)	CDH41	Bova et al. (2018)	0.744768	Extreme depletions, Low sed rate <2cm/kyr	0	0	0
-1.26567	-89.698	595	13961.5	68	TS	12550	45	15300	65	2750	79	12002	3253	91.25	1105	4	14	BA (12.8-14.8)	CDH41	Bova et al. (2018)	1.09229	Extreme depletions, Low sed rate <2cm/kyr	0	0	0
-1.26567	-89.698	595	14281	101	TS	12750	55	14600	70	1850	89	12330	2260	93.75	1105	4	14	BA (12.8-14.8)	CDH41	Bova et al. (2018)	1.2079	Extreme depletions, Low sed rate <2cm/kyr	0	0	0
-1.26567	-89.698	595	14871.5	264	TS	11850	65	14150	70	2300	96	12501	1631	160	1105	4	14		CDH41	Bova et al. (2018)	1.36166	Extreme depletions (flyer), Low sed rate <2cm/kyr	0	0	0
-1.26567	-89.698	595	15722	85	TS	13800	55	15500	75	1700	93	13113	2385	105.75	1105	4	14	HS1 (15-17.5)	CDH41	Bova et al. (2018)	1.60603	Extreme depletions, Low sed rate <2cm/kyr	0	0	0
-1.26567	-89.698	595	15907	76	TS	14350	60	15400	95	1050	112	13246	2151	111.5	1105	4	14	HS1 (15-17.5)	CDH41	Bova et al. (2018)	1.88596	Extreme depletions (flyer), Low sed rate <2cm/kyr	0	0	0
-1.26567	-89.698	595	16060	64	TS	13950	60	16500	80	2550	100	13356	3147	95	1105	4	14	HS1 (15-17.5)	CDH41	Bova et al. (2018)	2.19489	Extreme depletions	0	0	0
-1.26567	-89.698	595	16257	85	TS	12700	50	14950	60	2250	78	13480	1466	92.5	1105	4	14	HS1 (15-17.5)	CDH41	Bova et al. (2018)	2.47586	Extreme depletions (flyer)	0	0	0
-1.26567	-89.698	595	16484	74	TS	14300	70	16700	80	2400	106	13643	3052	98.5	1105	4	14	HS1 (15-17.5)	CDH41	Bova et al. (2018)	2.86642	Extreme depletions	0	0	0
-1.26567	-89.698	595	16735	94	TS	14450	60	17700	90	3250	108	13806	3899	106	1105	4	14	HS1 (15-17.5)	CDH41	Bova et al. (2018)	3.30146	Extreme depletions	0	0	0
-1.26567	-89.698	595	18125.5	144	TS	15650	80	18850	150	3200	170	14732	4065	237.25	1105	4	14		CDH41	Bova et al. (2018)	3.86196	Extreme depletions	0	0	0
-1.26567	-89.698	595	20971.5	158	TS	18150	90	21000	130	2850	158	17431	3590	192	1105	4	14	LGM (19-21.8)	CDH41	Bova et al. (2018)	4.29154	Extreme depletions	0	0	0
-1.26567	-89.698	595	21813	129	TS	18750	100	22300	160	3550	189	17887	4403	184.25	1105	4	14	LGM (19-21.8)	CDH41	Bova et al. (2018)	4.59588	Extreme depletions	0	0	0
-1.26567	-89.698	595	22772	142	TS	19700	140	21600	210	1900	252	18791	2780	247.5	1105	4	14		CDH41	Bova et al. (2018)	5.06104	Extreme depletions	0	0	0
-1.26567	-89.698	595	23479.5	124	TS	20400	120	23100	220	2700	251	19569	3606	234.75	1105	4	14		CDH41	Bova et al. (2018)	5.7497	Extreme depletions	0	0	0
-1.26567	-89.698	595	23851.5	114	TS	20600	120	23500	240	2900	268	19888	3658	306	1105	4	14		CDH41	Bova et al. (2018)	7.12743	Extreme depletions	0	0	0
-1.26567	-89.698	595	25178.5	569	TS	14200	60	24200	350	10000	355	20876	3281	623	1105	4	14	preLGM (25-30)	CDH41	Bova et al. (2018)	8.54896	Extreme depletions (flyer)	0	0	0
-1.26567	-89.698	595	26171	618	TS	17950	70	25500	140	7550	157	21971	3493	598	1105	4	14	preLGM (25-30)	CDH41	Bova et al. (2018)	8.98896	Extreme depletions (flyer)	0	0	0
-1.26567	-89.698	595	27277.5	562	TS	24700	210	29800	710	5100	740	22999	6746	927.25	1105	4	14	preLGM (25-30)	CDH41	Bova et al. (2018)	9.35753	Extreme depletions	0	0	0
-1.26567	-89.698	595	27519	398	TS	24000	120	28100	180	4100	216	23289	4783	494.25	1105	4	14	preLGM (25-30)	CDH41	Bova et al. (2018)	10.0022	Extreme depletions	0	0	0
-1.26567	-89.698	595	28783	475	TS	27200	190	27000	140	-200	236	24559	2438	426.75	1105	4	14	preLGM (25-30)	CDH41	Bova et al. (2018)	10.0841	Extreme depletions (Negative B-P)	0	0	0
-1.26567	-89.698	595	29612	273	TS	26200	260	28100	320	1900	412	25288	2777	400.5	1105	4	14	preLGM (25-30)	CDH41	Bova et al. (2018)	10.4772	Extreme depletions	0	0	0
-1.25217	-89.6845	617	1381	52	TS	1990	50	2080	20	90	54	1511	565	70.25	1105	4	15	HOL (<6)	GGC43	Bova et al. (2018)	1.44823	Extreme depletions, Low sed rate <2cm/kyr	0	0	0
-1.25217	-89.6845	617	4667	58	TS	4630	40	5420	30	790	50	4166	1274	43.25	1105	4	15	HOL (<6)	GGC43	Bova et al. (2018)	8.57082	Extreme depletions	0	0	0
-1.25217	-89.6845	617	6278	36	TS	6050	35	6520	30	470	46	5436	1067	70.75	1105	4	15		GGC43	Bova et al. (2018)	11.2297	Extreme depletions	0	0	0
-1.25217	-89.6845	617	8327	52	TS	8030	50	8180	40	150	64	7467.4	699	80.5	1105	4	15	EHOL (7-11)	GGC43	Bova et al. (2018)	12.0091	Extreme depletions	0	0	0
-1.25217	-89.6845	617	9311	49	TS	8800	40	9040	40	240	57	8315.2	738	61	1105	4	15	EHOL (7-11)	GGC43	Bova et al. (2018)	15.036	Extreme depletions	0	0	0
-1.25217	-89.6845	617	11116	34	TS	10150	35	10300	30	150	46	9658	653	51.75	1105	4	15		GGC43	Bova et al. (2018)	16.1929	Extreme depletions	0	0	0
-1.25217	-89.6845	617	12533	69	TS	11150	70	12200	55	1050	89	10535	1700	89.5	1105	4	15	YD (11.8-12.7)	GGC43	Bova et al. (2018)	17.5537	Extreme depletions	0	0	0
-2	-140	4400	17753.5	603	TS	15300	55	16400	60	1100	81	14479	1861	476.75	1909	4	16	HS1 (15-17.5)	TTN013-18	Broecker and Clark (2010)	1.85879	Low sed rate <2cm/kyr	0	1	0
-2	-140	4400	22189.5	506	TS	19125	75	20700	70	1575	103	18229	2440	380.75	1909	4	16	LGM (19-21.8)	TTN013-18	Broecker and Clark (2010)	1.75759	Low sed rate <2cm/kyr	0	1	0
-2	-140	4400	24685.5	377	TS	21375	140	22500	110	1125	178	20531	1981	310	1909	4	16	preLGM (25-30)	TTN013-18	Broecker and Clark (2010)	1.74191	Low sed rate <2cm/kyr	0	1	0
-2	-140	4400	26061.5	327	TS	22650	120	23500	180	850	216	21947	1627	410.5	1909	4	16	preLGM (25-30)	TTN013-18	Broecker and Clark (2010)	1.76506	Low sed rate <2cm/kyr	0	1	0
-2	-140	4400	27362.5	329	TS	24225	180	25000	190	775	262	23192	1865	460.25	1909	4	16	preLGM (25-30)	TTN013-18	Broecker and Clark (2010)	1.71768	Low sed rate <2cm/kyr	0	1	0
-2	-140	4400	28556.5	526	TS	22333.3	190	23000	110	666.667	220	24243	1314	-456	1909	4	16	preLGM (25-30)	TTN013-18	Broecker and Clark (2010)	1.78593	Low sed rate <2cm/kyr	0	1	0
-2	-140	4400	30101.5	686	TS	22513.3	180	22610	180	96.6667	255	25902	3339	-639.5	1909	4	16	preLGM (25-30)	TTN013-18	Broecker and Clark (2010)	1.82715	Low sed rate <2cm/kyr	0	1	0
-2	-140	4400	31790	466	TS	28545	180	30000	180	1455	255	27908	2070	482.75	1909	4	16		TTN013-18	Broecker and Clark (2010)	1.85593	Low sed rate <2cm/kyr	0	1	0
-10.2833	-111.333	3225	14363	251	S	12780	160	16220	300	3440	340	12397	3873	324	1948	4	17	BA (12.8-14.8)	TT154-10	Broecker et al. (1988a)	1.81021	Low sed rate <2cm/kyr *	0	1	0
-10.2833	-111.333	3225	18520	232	S	16040	225	17500	380	1460	442	15114	2281	441	1948	4	17		TT154-10	Broecker et al. (1988a)	1.61987	Low sed rate <2cm/kyr *	0	1	0
-10.2833	-111.333	3225	19101	273	S	16560	240	19170	420	2610	484	15833	3345	490	1948	4	17	LGM (19-21.8)	TT154-10	Broecker et al. (1988a)	1.78001	Low sed rate <2cm/kyr *	0	1	0
-10.2833	-111.333	3225	20078	439	S	17390	370	20180	610	2790	713	16607	3540	696	1948	4	17	LGM (19-21.8)	TT154-10	Broecker et al. (1988a)	1.79301	Low sed rate <2cm/kyr *	0	1	0
-10.2833	-111.333	3225	23263	228	S	20110	220	21980	640	1870	677	19368	2637	660	1948	4	17		TT154-10	Broecker et al. (1988a)	1.71947	Low sed rate <2cm/kyr *	0	1	0
-10.2833	-111.333	3225	7013	120	S	6715	110	9400	120	2685	163	6163.8	3262	150	1948	4	17	EHOL (7-11)	TT154-10	Broecker et al. (1988b)	1.71111	Low sed rate <2cm/kyr *	0	1	0
1.01667	160.483	3120	7542	148	S	7252.5	160	9530	80	2277.5	179	6625	2861	191	1986	3	18	EHOL (7-11)	V28-238	Broecker et al. (1988b)	1.32591	Low sed rate <2cm/kyr *	0	1	0
1.01667	160.483	3120	8885	139	S	8485	100	12080	120	3595	156	7969	4084	153	1986	3	18	EHOL (7-11)	V28-238	Broecker et al. (1988b)	1.46314	Low sed rate <2cm/kyr *	0	1	0
1.01667	160.483	3120	10670	281	S	9852.5	220	11660	260	1807.5	341	9432	2229	327	1986	3	18	EHOL (7-11)	V28-238	Broecker et al. (1988b)	1.68697	Low sed rate <2cm/kyr *	0	1	0
1.01667	160.483	3120	13605	559	S	12165	460	16140	390	3975	603	11797	4375	631	1986	3	18	BA (12.8-14.8)	V28-238	Broecker et al. (1988b)	2.20507	Low sed rate <2cm/kyr	0	1	0
1.01667	160.483	3120	21688	450	S	18700	390	20650	220	1950	448	17801	2789	415	1986	3	18	LGM (19-21.8)	V28-238	Broecker et al. (1988b)	1.89045	Low sed rate <2cm/kyr *	0	1	0
1.01667	160.483	3120	23145	283	S	20000	260	22110	350	2110	436	19284	2873	437	1986	3	18		V28-238	Broecker et al. (1988b)	1.94426	Low sed rate <2cm/kyr *	0	1	0
1.01667	160.483	3120	25111	1282	S	21832.5	1290	22440	690	607.5	1463	20799	1396	641	1986	3	18	preLGM (25-30)	V28-238	Broecker et al. (1988b)	1.99116	Low sed rate <2cm/kyr *	0	1	0
4.867	-43.217	3995	16142	375	S	14045	295	14760	140	715	327	13399	1344	288	949	1	19	HS1 (15-17.5)	KNR110 50GGC	Broecker et al. (1990a)	1.239	Low sed rate <2cm/kyr *	0	1	0
4.867	-43.217	3995	19433	169	S	16853	130	17110	190	257	230	16061	1011	242	949	1	19	LGM (19-21.8)	KNR110 50GGC	Broecker et al. (1990a)	1.13209	Low sed rate <2cm/kyr *	0	0	0
4.867	-43.217	3995	20176	133	S	17450	115	18360	200	910	231	16682	1673	224	949	1	19	LGM (19-21.8)	KNR110 50GGC	Broecker et al. (1990a)	1.33822	Low sed rate <2cm/kyr *	0	0	0
4.867	-43.217	3995	21338	262	S	18405	205	19110	190	705	280	17596	1461	253	949	1	19	LGM (19-21.8)	KNR110 50GGC	Broecker et al. (1990a)	1.45281	Low sed rate <2cm/kyr *	0	0	0
4.867	-43.217	3995	22278	265	S	19195	245	20360	220	1165	329	18309	2009	347	949	1	19		KNR110 50GGC	Broecker et al. (1990a)	1.57106	Low sed rate <2cm/kyr *	0	1	0
4.567	-43.383	3547	19070	124	S	16555	105	17030	150	475	183	15806	1214	190	949	1	20	LGM (19-21.8)	KNR110 66GGC	Broecker et al. (1990a)	2.35973	Time-series flag	1	1	0
4.567	-43.383	3547	19547	145	S	16945	115	17690	150	745	189	16208	1477	204	949	1	20	LGM (19-21.8)	KNR110 66GGC	Broecker et al. (1990a)	2.50678	Time-series flag	1	1	0
4.567	-43.383	3547	20933	157	S	18100	120	18630	180	530	216	17380	1263	231	949	1	20	LGM (19-21.8)	KNR110 66GGC	Broecker et al. (1990a)	2.53189	Time-series flag	1	1	0
4.567	-43.383	3547	22001	151	S	18920	135	19540	220	620	258	18035	1487	259	949	1	20		KNR110 66GGC	Broecker et al. (1990a)	2.54534	Time-series flag	1	1	0
4.333	-43.483	2816	16044	129	S	13970	100	14930	200	960	224	13346	1589	216	870	1	21	HS1 (15-17.5)	KNR110 82GGC	Broecker et al. (1990a)	1.55821	Low sed rate <2cm/kyr *	0	1	0
4.333	-43.483	2816	17379	106	S	15050	75	16350	280	1300	290	14296	2051	299	870	1	21	HS1 (15-17.5)	KNR110 82GGC	Broecker et al. (1990a)	1.72622	Low sed rate <2cm/kyr *	0	1	0
4.333	-43.483	2816	18500	143	S	16020	145	16130	240	110	280	15143	938	268	870	1	21		KNR110 82GGC	Broecker et al. (1990a)	1.89189	Low sed rate <2cm/kyr *	0	1	0
4.333	-43.483	2816	19724	309	S	17085	255	17870	370	785	449	16358	1516	439	870	1	21	LGM (19-21.8)	KNR110 82GGC	Broecker et al. (1990a)	2.02799	Time-series flag	1	1	0
4.333	-43.483	2816	20408	220	S	17650	190	17900	640	250	668	16861	1007	504	870	1	21	LGM (19-21.8)	KNR110 82GGC	Broecker et al. (1990a)	2.20502	Time-series flag	1	1	0
11.933	-78.683	1800	19671	117	S	17045	100	17300	150	255	180	16385	968	181	742	1	22	LGM (19-21.8)	Vema28-122	Broecker et al. (1990a)	5.84617		1	1	0
11.933	-78.683	1800	20259	171	S	17525	145	17610	180	85	231	16743	856	230	742	1	22	LGM (19-21.8)	Vema28-122	Broecker et al. (1990a)	6.07138		1	1	0
11.933	-78.683	1800	21149.5	470	S	18245	405	18530	420	285	583	17546	1014	521	742	1	22	LGM (19-21.8)	Vema28-122	Broecker et al. (1990a)	6.09943		1	1	0
18.9167	115.75	2695	1236	70	TS	2040	70	3970	80	1930	106	1254	2675	116.75	1986	3	23	HOL (<6)	50-37KL	Broecker et al. (1990b)	6.47249		1	1	0
18.9167	115.75	2695	5972	93	TS	5960	80	8270	100	2310	128	5213.6	3047	137	1986	3	23	HOL (<6)	50-37KL	Broecker et al. (1990b)	6.69792		1	1	0
18.9167	115.75	2695	8647	138	TS	8500	110	10030	120	1530	163	7909	2165	164.5	1986	3	23	EHOL (7-11)	50-37KL	Broecker et al. (1990b)	6.93882		1	1	0
18.9167	115.75	2695	11364	134	TS	10560	100	11890	110	1330	149	9987	1932	160.5	1986	3	23		50-37KL	Broecker et al. (1990b)	7.03977		1	1	0
18.9167	115.75	2695	13950	203	TS	12730	140	13710	120	980	184	12008	1647	209.5	1986	3	23	BA (12.8-14.8)	50-37KL	Broecker et al. (1990b)	11.1111		1	1	1
18.9167	115.75	2695	17258	188	TS	15140	150	17100	220	1960	266	14150	2902	269.75	1986	3	23	HS1 (15-17.5)	50-37KL	Broecker et al. (1990b)	9.27106		1	1	0
18.9167	115.75	2695	18174	130	TS	15910	110	17430	140	1520	178	14782	2589	229	1986	3	23		50-37KL	Broecker et al. (1990b)	9.62914		1	1	1
18.9167	115.75	2695	18280	135	TS	16000	120	17590	140	1590	184	15078	2547	227.75	1986	3	23		50-37KL	Broecker et al. (1990b)	10.1204		1	1	1
18.9167	115.75	2695	19939	192	TS	17460	160	18940	160	1480	226	16533	2426	214.75	1986	3	23	LGM (19-21.8)	50-37KL	Broecker et al. (1990b)	9.77983		1	1	1
18.9167	115.75	2695	20177	223	TS	17660	180	19445	190	1785	262	16682	2751	261.5	1986	3	23	LGM (19-21.8)	50-37KL	Broecker et al. (1990b)	10.1601		1	1	1
-1	146	1900	21449	203	S	18636	150	20590	140	1954	205	17769	2872	186	1864	4	24	LGM (19-21.8)	MD97-2138	Broecker et al. (2004a)	9.6508		1	1	1
-1	146	1900	21830	234	S	18950	200	20590	150	1640	250	17901	2666	227.5	1864	4	24	LGM (19-21.8)	MD97-2138	Broecker et al. (2004a)	9.6656		1	1	1
6	126	2100	18867	161	S	16520	150	17690	130	1170	198	15601	2094	237.5	1905	3	25	LGM (19-21.8)	MD98-2181	Broecker et al. (2004a)	67.3133		1	1	1
6	126	2100	19088	165	S	16725	150	18050	130	1325	198	15821	2218	202.25	1905	3	25	LGM (19-21.8)	MD98-2181	Broecker et al. (2004a)	66.1148		1	1	1
6	126	2100	19445	186	S	17025	150	18350	120	1325	192	16073	2245	200.25	1905	3	25	LGM (19-21.8)	MD98-2181	Broecker et al. (2004a)	65.7753		1	1	1
-1.5	-85.8	2570	19305	142	S	16750	120	18455	140	1705	184	15986	2462	180.75	2036	4	26	LGM (19-21.8)	RC11-238	Broecker et al. (2004b)	4.921		1	1	0
-1.5	-85.8	2570	20909	187	S	18080	150	20160	150	2080	212	17344	2818	220.75	2036	4	26	LGM (19-21.8)	RC11-238	Broecker et al. (2004b)	5.02176		1	1	0
-0.5	-82.1	1370	18095	109	S	15635	110	16650	150	1015	186	14720	1904	202.75	1684	4	27		V19-27	Broecker et al. (2004b)	4.97375		1	1	0
-0.5	-82.1	1370	21155	170	S	18270	130	19355	140	1085	191	17548	1817	188	1684	4	27	LGM (19-21.8)	V19-27	Broecker et al. (2004b)	4.72701		1	1	0
-5.5	-106.8	3180	17799	132	S	15365	100	17090	110	1725	149	14514	2551	142	1985	4	28		V21-40	Broecker et al. (2004b)	4.21372		1	1	0
-5.5	-106.8	3180	21007.5	317	S	18140	250	20370	150	2230	292	17470	2938	285	1985	4	28	LGM (19-21.8)	V21-40	Broecker et al. (2004b)	4.04617		1	1	0
1	130	2800	820	83	TS	1597	88	2790	35	1193	95	943	1865	102.75	1951	3	29	HOL (<6)	MD01-2386	Broecker et al. (2008)	NaN		1	1	1
1	130	2800	4976	111	TS	5043	90	6800	60	1757	108	4416	2389	116.5	1951	3	29	HOL (<6)	MD01-2386	Broecker et al. (2008)	19.6945		1	1	1
1	130	2800	9940	127	TS	9473	91	10750	110	1277	143	8879	1895	127.25	1951	3	29	EHOL (7-11)	MD01-2386	Broecker et al. (2008)	19.9195		1	1	1
1	130	2800	10893	128	TS	10166	91	11550	70	1384	115	9624.4	1973	96.25	1951	3	29	EHOL (7-11)	MD01-2386	Broecker et al. (2008)	20.4719		1	1	1
1	130	2800	12290	105	TS	11120	72	12550	55	1430	91	10417	2166	67.25	1951	3	29	YD (11.8-12.7)	MD01-2386	Broecker et al. (2008)	20.179		1	1	1
1	130	2800	12830	86	TS	11662	93	12900	70	1238	116	10930	1962	139	1951	3	29	BA (12.8-14.8)	MD01-2386	Broecker et al. (2008)	21.2783		1	1	1
1	130	2800	13884	122	TS	12644	94	14100	210	1456	230	12059	2092	233	1951	3	29	BA (12.8-14.8)	MD01-2386	Broecker et al. (2008)	21.4636		1	1	1
1	130	2800	14049	188	TS	12761	122	14200	75	1439	143	12128	2052	168.25	1951	3	29	BA (12.8-14.8)	MD01-2386	Broecker et al. (2008)	22.991		1	1	1
1	130	2800	15196	164	TS	13480	126	15100	85	1620	152	12741	2355	150.5	1951	3	29	HS1 (15-17.5)	MD01-2386	Broecker et al. (2008)	22.9008		1	1	1
1	130	2800	16195	150	TS	14250	117	15350	250	1100	276	13434	1905	268	1951	3	29	HS1 (15-17.5)	MD01-2386	Broecker et al. (2008)	23.0318		1	1	1
1	130	2800	16339	130	TS	14362	102	16000	95	1638	139	13553	2451	134.5	1951	3	29	HS1 (15-17.5)	MD01-2386	Broecker et al. (2008)	24.3589		1	1	1
1	130	2800	17135	133	TS	15001	117	16450	90	1449	148	14151	2344	151.25	1951	3	29	HS1 (15-17.5)	MD01-2386	Broecker et al. (2008)	24.6863		1	1	1
1	130	2800	17239	140	TS	15098	114	16900	80	1802	139	14148	2726	154.75	1951	3	29	HS1 (15-17.5)	MD01-2386	Broecker et al. (2008)	25.9876		1	1	1
1	130	2800	18056.5	173	TS	15760	147	17550	90	1790	172	14707	2832	215.25	1951	3	29		MD01-2386	Broecker et al. (2008)	26.1956		1	1	1
1	130	2800	18689	119	TS	16338	105	17850	60	1512	121	15339	2513	169	1951	3	29		MD01-2386	Broecker et al. (2008)	26.6467		1	1	1
1	130	2800	19232	132	TS	16849	111	18550	65	1701	129	15965	2601	121	1951	3	29	LGM (19-21.8)	MD01-2386	Broecker et al. (2008)	27.1943		1	1	1
18.25	57.66	596	8890	520	C	NaN	NaN	9115	20	NaN	NaN	7966	1124	324	837	5	30	EHOL (7-11)	RC27-14	Bryan et al. (2010)	15.2542		1	1	1
18.25	57.66	596	9480	540	C	NaN	NaN	10540	25	NaN	NaN	8452	2043	347	837	5	30	EHOL (7-11)	RC27-14	Bryan et al. (2010)	16.6667		1	1	1
18.25	57.66	596	9510	540	C	NaN	NaN	11045	25	NaN	NaN	8487	2450	307.5	837	5	30	EHOL (7-11)	RC27-14	Bryan et al. (2010)	15.4412		1	1	1
18.25	57.66	596	10190	240	C	NaN	NaN	10105	25	NaN	NaN	8986	1107	173.75	837	5	30	EHOL (7-11)	RC27-14	Bryan et al. (2010)	15.1515		1	1	1
18.25	57.66	596	10850	210	C	NaN	NaN	13130	30	NaN	NaN	9581	3568	147.25	837	5	30	EHOL (7-11)	RC27-14	Bryan et al. (2010)	15.2542		1	1	1
18.25	57.66	596	11440	190	C	NaN	NaN	11425	25	NaN	NaN	10021	1418	141.75	837	5	30		RC27-14	Bryan et al. (2010)	13.253		1	1	1
18.25	57.66	596	12270	210	C	NaN	NaN	11975	30	NaN	NaN	10392	1597	113.25	837	5	30	YD (11.8-12.7)	RC27-14	Bryan et al. (2010)	12.6761		1	1	1
18.25	57.66	596	12980	240	C	NaN	NaN	12980	25	NaN	NaN	11047	1930	205.5	837	5	30	BA (12.8-14.8)	RC27-14	Bryan et al. (2010)	12.5		1	1	1
18.25	57.66	596	13140	250	C	NaN	NaN	12980	40	NaN	NaN	11240	1720	261	837	5	30	BA (12.8-14.8)	RC27-14	Bryan et al. (2010)	12.6984		1	1	1
18.25	57.66	596	13770	220	C	NaN	NaN	12725	25	NaN	NaN	11889	823	206.5	837	5	30	BA (12.8-14.8)	RC27-14	Bryan et al. (2010)	12.5		1	1	1
18.25	57.66	596	13890	210	C	NaN	NaN	13450	30	NaN	NaN	12065	1428	184.5	837	5	30	BA (12.8-14.8)	RC27-14	Bryan et al. (2010)	12.8378		1	1	1
18.25	57.66	596	14630	200	C	NaN	NaN	14435	35	NaN	NaN	12476	1996	83.75	837	5	30	BA (12.8-14.8)	RC27-14	Bryan et al. (2010)	14.4737		1	1	1
18.25	57.66	596	15010	200	C	NaN	NaN	14950	30	NaN	NaN	12604	2351	141.75	837	5	30	HS1 (15-17.5)	RC27-14	Bryan et al. (2010)	14.5161		1	1	1
18.25	57.66	596	15320	200	C	NaN	NaN	15180	30	NaN	NaN	12856	2332	149.75	837	5	30	HS1 (15-17.5)	RC27-14	Bryan et al. (2010)	14.7059		1	1	1
18.25	57.66	596	16000	240	C	NaN	NaN	15535	35	NaN	NaN	13309	2220	176.25	837	5	30	HS1 (15-17.5)	RC27-14	Bryan et al. (2010)	14.5161		1	1	1
18.25	57.66	596	16620	280	C	NaN	NaN	16060	35	NaN	NaN	13741	2319	175.25	837	5	30	HS1 (15-17.5)	RC27-14	Bryan et al. (2010)	14.6667		1	1	1
18.25	57.66	596	17370	340	C	NaN	NaN	15900	35	NaN	NaN	14280	1596	236	837	5	30	HS1 (15-17.5)	RC27-14	Bryan et al. (2010)	14.4928		1	1	1
18.25	57.66	596	18060	400	C	NaN	NaN	16220	40	NaN	NaN	14708	1497	341.75	837	5	30		RC27-14	Bryan et al. (2010)	14.6341		1	1	1
18.25	57.66	596	18470	370	C	NaN	NaN	17470	45	NaN	NaN	15190	2277	363	837	5	30		RC27-14	Bryan et al. (2010)	14.8148		1	1	1
18.25	57.66	596	18740	350	C	NaN	NaN	17190	45	NaN	NaN	15402	1763	289.25	837	5	30	LGM (19-21.8)	RC27-14	Bryan et al. (2010)	14.6018		1	1	1
18.25	57.66	596	21000	290	C	NaN	NaN	18530	45	NaN	NaN	17462	1073	228.5	837	5	30	LGM (19-21.8)	RC27-14	Bryan et al. (2010)	13.41		1	1	1
18.25	57.66	596	23610	200	C	NaN	NaN	21870	70	NaN	NaN	19436	2341	201.5	837	5	30		RC27-14	Bryan et al. (2010)	10.8812		1	1	1
17.99	57.59	820	8630	500	C	NaN	NaN	9505	20	NaN	NaN	7854	1611	385.75	933	5	31	EHOL (7-11)	RC27-23	Bryan et al. (2010)	12.987		1	1	1
17.99	57.59	820	9400	510	C	NaN	NaN	10525	25	NaN	NaN	8311	2147	344.25	933	5	31	EHOL (7-11)	RC27-23	Bryan et al. (2010)	13.1579		1	1	1
17.99	57.59	820	9780	520	C	NaN	NaN	10210	20	NaN	NaN	8796	1416	115	933	5	31	EHOL (7-11)	RC27-23	Bryan et al. (2010)	12.8205		1	1	1
17.99	57.59	820	10170	250	C	NaN	NaN	11170	30	NaN	NaN	8936	2203	179.75	933	5	31	EHOL (7-11)	RC27-23	Bryan et al. (2010)	12.8205		1	1	1
17.99	57.59	820	10560	230	C	NaN	NaN	10755	25	NaN	NaN	9326	1402	138.75	933	5	31	EHOL (7-11)	RC27-23	Bryan et al. (2010)	13.1579		1	1	1
17.99	57.59	820	10940	220	C	NaN	NaN	12835	25	NaN	NaN	9609	3246	133.75	933	5	31	EHOL (7-11)	RC27-23	Bryan et al. (2010)	12.8205		1	1	1
17.99	57.59	820	11330	210	C	NaN	NaN	11965	30	NaN	NaN	9956	2013	148.25	933	5	31		RC27-23	Bryan et al. (2010)	12.5		1	1	1
17.99	57.59	820	11730	210	C	NaN	NaN	12255	25	NaN	NaN	10091	2146	109	933	5	31	YD (11.8-12.7)	RC27-23	Bryan et al. (2010)	12.1951		1	1	1
17.99	57.59	820	12140	220	C	NaN	NaN	12420	25	NaN	NaN	10355	2069	115.75	933	5	31	YD (11.8-12.7)	RC27-23	Bryan et al. (2010)	11.9048		1	1	1
17.99	57.59	820	12560	230	C	NaN	NaN	12590	25	NaN	NaN	10472	2065	117	933	5	31	YD (11.8-12.7)	RC27-23	Bryan et al. (2010)	11.9048		1	1	1
17.99	57.59	820	12980	250	C	NaN	NaN	13325	30	NaN	NaN	11047	2274	289.75	933	5	31	BA (12.8-14.8)	RC27-23	Bryan et al. (2010)	12.1951		1	1	1
17.99	57.59	820	13390	240	C	NaN	NaN	13365	30	NaN	NaN	11511	1837	188.5	933	5	31	BA (12.8-14.8)	RC27-23	Bryan et al. (2010)	11.9048		1	1	1
17.99	57.59	820	13810	210	C	NaN	NaN	12930	30	NaN	NaN	12013	961	190.5	933	5	31	BA (12.8-14.8)	RC27-23	Bryan et al. (2010)	11.9048		1	1	1
17.99	57.59	820	14230	200	C	NaN	NaN	13315	25	NaN	NaN	12316	1004	127.5	933	5	31	BA (12.8-14.8)	RC27-23	Bryan et al. (2010)	11.9048		1	1	1
17.99	57.59	820	14650	200	C	NaN	NaN	15595	40	NaN	NaN	12480	3152	87.75	933	5	31	BA (12.8-14.8)	RC27-23	Bryan et al. (2010)	10.5263		1	1	1
17.99	57.59	820	15600	220	C	NaN	NaN	16165	50	NaN	NaN	13012	3143	163.75	933	5	31	HS1 (15-17.5)	RC27-23	Bryan et al. (2010)	10.4167		1	1	1
17.99	57.59	820	16080	250	C	NaN	NaN	15890	35	NaN	NaN	13368	2521	180.25	933	5	31	HS1 (15-17.5)	RC27-23	Bryan et al. (2010)	10.4167		1	1	1
17.99	57.59	820	16560	280	C	NaN	NaN	15980	30	NaN	NaN	13694	2279	184.75	933	5	31	HS1 (15-17.5)	RC27-23	Bryan et al. (2010)	5.2356		1	1	0
17.99	57.59	820	18470	400	C	NaN	NaN	16450	35	NaN	NaN	15190	1256	364	933	5	31		RC27-23	Bryan et al. (2010)	31.9149		1	1	1
17.99	57.59	820	18940	360	C	NaN	NaN	17015	35	NaN	NaN	15706	1299	301.5	933	5	31	LGM (19-21.8)	RC27-23	Bryan et al. (2010)	10.4167		1	1	1
17.99	57.59	820	19420	340	C	NaN	NaN	17440	35	NaN	NaN	16048	1369	294.25	933	5	31	LGM (19-21.8)	RC27-23	Bryan et al. (2010)	10.4167		1	1	1
17.99	57.59	820	19900	320	C	NaN	NaN	17995	40	NaN	NaN	16488	1504	262.25	933	5	31	LGM (19-21.8)	RC27-23	Bryan et al. (2010)	9.66184		1	1	1
17.99	57.59	820	21970	320	C	NaN	NaN	18940	60	NaN	NaN	18003	915	286.5	933	5	31	LGM (19-21.8)	RC27-23	Bryan et al. (2010)	11.9254		1	1	1
-54.485	-62.214	318	13397	38	C	NaN	NaN	12750	90	NaN	NaN	11512	1224	96.75	1034	8	32	BA (12.8-14.8)	LMG06-05-9_1	Burke and Robinson (2012)	NaN		1	1	1
-54.485	-62.214	318	13707	34	C	NaN	NaN	13150	90	NaN	NaN	11823	1319	94.25	1034	8	32	BA (12.8-14.8)	LMG06-05-9_3	Burke and Robinson (2012)	NaN		1	1	1
-60.182	-57.834	819	25647	161	C	NaN	NaN	23600	520	NaN	NaN	21214	2329	545.5	1252	8	32	preLGM (25-30)	NBP0805-DR23_Dc-A-1	Burke and Robinson (2012)	NaN		1	1	1
-60.182	-57.834	819	35466	153	C	NaN	NaN	32700	1600	NaN	NaN	31163	1565	783.5	1252	8	32		NBP0805-DR23_Dc-A-2	Burke and Robinson (2012)	NaN		1	1	1
-60.182	-57.834	819	39253	150.5	C	NaN	NaN	35900	2300	NaN	NaN	34031	1864	932.5	1252	8	32		NBP0805-DR23_Dc-A-3	Burke and Robinson (2012)	NaN		1	1	1
-60.182	-57.834	819	20330	172.5	C	NaN	NaN	18550	280	NaN	NaN	16803	1733	315	1252	8	32	LGM (19-21.8)	NBP0805-DR23_Dc-A-4	Burke and Robinson (2012)	NaN		1	1	1
-60.182	-57.834	819	13187	77	C	NaN	NaN	12400	160	NaN	NaN	11350	1097	188.5	1252	8	32	BA (12.8-14.8)	NBP0805-DR23_Dc-A-5	Burke and Robinson (2012)	NaN		1	1	1
-60.182	-57.834	819	15688	50	C	NaN	NaN	14900	200	NaN	NaN	13087	1812	203.25	1252	8	32	HS1 (15-17.5)	NBP0805-DR23_Dc-A-6	Burke and Robinson (2012)	NaN		1	1	1
-60.182	-57.834	819	11911	62.5	C	NaN	NaN	11250	130	NaN	NaN	10212	1017	137	1252	8	32	YD (11.8-12.7)	NBP0805-DR23_Dc-A-7	Burke and Robinson (2012)	NaN		1	1	1
-60.547	-65.949	1134	21524	110	C	NaN	NaN	19450	330	NaN	NaN	17813	1676	333	1259	8	32	LGM (19-21.8)	NBP0805-DR27_Dc-A-1	Burke and Robinson (2012)	NaN		1	1	1
-59.733	-68.743	869	6858	34.5	C	NaN	NaN	7160	95	NaN	NaN	6022.6	1143	97.75	1198	8	32		NBP0805-DR34_Dc-A-1	Burke and Robinson (2012)	NaN		1	1	1
-59.733	-68.743	869	5819	33	C	NaN	NaN	6290	95	NaN	NaN	5066.8	1228	96.25	1198	8	32	HOL (<6)	NBP0805-DR34_Dc-A-2	Burke and Robinson (2012)	NaN		1	1	1
-59.723	-68.881	695	1708	14	C	NaN	NaN	2730	75	NaN	NaN	1797	934	82.75	1151	8	32	HOL (<6)	NBP0805-DR35_Dc-A-1	Burke and Robinson (2012)	NaN		1	1	1
-59.723	-68.881	695	1749	17	C	NaN	NaN	2730	75	NaN	NaN	1881	862	77	1151	8	32	HOL (<6)	NBP0805-DR35_Dc-A-1	Burke and Robinson (2012)	NaN		1	1	1
-59.723	-68.881	695	14710	47.5	C	NaN	NaN	13450	170	NaN	NaN	12427	1021	176	1151	8	32	BA (12.8-14.8)	NBP0805-DR35_Dc-A-2a	Burke and Robinson (2012)	NaN		1	1	1
-59.723	-68.881	695	11365	67.5	C	NaN	NaN	10550	130	NaN	NaN	9987	577	139.75	1151	8	32		NBP0805-DR35_Dc-A-2c	Burke and Robinson (2012)	NaN		1	1	1
-59.723	-68.881	695	11376	36	C	NaN	NaN	10800	130	NaN	NaN	9963	817	133	1151	8	32		NBP0805-DR35_Dc-B-1a	Burke and Robinson (2012)	NaN		1	1	1
-59.723	-68.881	695	11253	42	C	NaN	NaN	10600	140	NaN	NaN	9877.4	736	156.75	1151	8	32		NBP0805-DR35_Dc-B-1b	Burke and Robinson (2012)	NaN		1	1	1
-59.723	-68.881	695	11405	47	C	NaN	NaN	10750	140	NaN	NaN	10027	750	142.75	1151	8	32		NBP0805-DR35_Dc-C-1b	Burke and Robinson (2012)	NaN		1	1	1
-59.723	-68.881	695	11460	47.5	C	NaN	NaN	10750	140	NaN	NaN	10008	729	140.5	1151	8	32		NBP0805-DR35_Dc-C-1b	Burke and Robinson (2012)	NaN		1	1	1
-59.723	-68.881	695	7699	33.5	C	NaN	NaN	7890	130	NaN	NaN	6904.8	1006	137.25	1151	8	32	EHOL (7-11)	NBP0805-DR35_Dc-C-2	Burke and Robinson (2012)	NaN		1	1	1
-59.723	-68.881	695	11117	33	C	NaN	NaN	10600	130	NaN	NaN	9658	954	133	1151	8	32		NBP0805-DR35_Dc-D-1	Burke and Robinson (2012)	NaN		1	1	1
-59.723	-68.881	695	11142	34.5	C	NaN	NaN	10700	150	NaN	NaN	9656.2	1031	153.5	1151	8	32		NBP0805-DR35_Dc-D-3	Burke and Robinson (2012)	NaN		1	1	1
-59.723	-68.881	695	10144	31	C	NaN	NaN	9850	120	NaN	NaN	8900.6	936	125.75	1151	8	32	EHOL (7-11)	NBP0805-DR35_Dc-D-4	Burke and Robinson (2012)	NaN		1	1	1
-59.723	-68.881	695	10255	40.5	C	NaN	NaN	10100	170	NaN	NaN	9166	974	183.75	1151	8	32	EHOL (7-11)	NBP0805-DR35_Dc-D-5	Burke and Robinson (2012)	NaN		1	1	1
-59.723	-68.881	695	11664	85	C	NaN	NaN	10800	150	NaN	NaN	10087	724	154.25	1151	8	32		NBP0805-DR35_Dc-E-1	Burke and Robinson (2012)	NaN		1	1	1
-59.723	-68.881	695	11699	64.5	C	NaN	NaN	10800	150	NaN	NaN	10084	710	153	1151	8	32		NBP0805-DR35_Dc-E-1	Burke and Robinson (2012)	NaN		1	1	1
-59.707	-69.008	1750	10304	39.5	C	NaN	NaN	10050	110	NaN	NaN	9209.4	862	116	1326	8	32	EHOL (7-11)	NBP0805-DR36_Dc-A-1	Burke and Robinson (2012)	NaN		1	1	1
-59.707	-69.008	1750	12287	54	C	NaN	NaN	11550	140	NaN	NaN	10420	1161	139.75	1326	8	32	YD (11.8-12.7)	NBP0805-DR36_Dc-A-2	Burke and Robinson (2012)	NaN		1	1	1
-59.707	-69.008	1750	12798	61	C	NaN	NaN	11900	150	NaN	NaN	10910	1006	180.25	1326	8	32	BA (12.8-14.8)	NBP0805-DR36_Dc-A-3	Burke and Robinson (2012)	NaN		1	1	1
-59.743	-68.898	978	11608	65.5	C	NaN	NaN	10800	130	NaN	NaN	10036	749	132	1198	8	32		NBP0805-DR38_Dc-A-1	Burke and Robinson (2012)	NaN		1	1	1
-59.732	-68.933	1323	1144	27	C	NaN	NaN	2120	70	NaN	NaN	1217	903	75.75	1248	8	32	HOL (<6)	NBP0805-DR40_Dc-A-1	Burke and Robinson (2012)	NaN		1	1	1
-54.734	-62.216	816	468	10.5	C	NaN	NaN	1380	60	NaN	NaN	369	1006	60.5	1168	8	32	HOL (<6)	NBP0805-TB04_BigBeautyA	Burke and Robinson (2012)	NaN		1	1	1
-54.734	-62.216	816	16402	155	C	NaN	NaN	14200	180	NaN	NaN	13603	607	208.25	1168	8	32	HS1 (15-17.5)	NBP0805-TB04_Dn-A-10	Burke and Robinson (2012)	NaN		1	1	1
-54.734	-62.216	816	4643	84.5	C	NaN	NaN	4850	75	NaN	NaN	4137	720	90.5	1168	8	32	HOL (<6)	NBP0805-TB04_Dn-A-11	Burke and Robinson (2012)	NaN		1	1	1
-54.734	-62.216	816	5883	26.5	C	NaN	NaN	5990	90	NaN	NaN	5056.6	909	100.75	1168	8	32	HOL (<6)	NBP0805-TB04_Dn-A-13	Burke and Robinson (2012)	NaN		1	1	1
-54.734	-62.216	816	11777	67.5	C	NaN	NaN	10700	140	NaN	NaN	10145	562	146.5	1168	8	32	YD (11.8-12.7)	NBP0805-TB04_Dn-B-4	Burke and Robinson (2012)	NaN		1	1	1
-54.734	-62.216	816	6470	24	C	NaN	NaN	6430	95	NaN	NaN	5687	736	98.25	1168	8	32		NBP0805-TB04_Dn-D-6	Burke and Robinson (2012)	NaN		1	1	1
-54.734	-62.216	816	66	5.5	C	NaN	NaN	870	70	NaN	NaN	115	753	69.25	1168	8	32	HOL (<6)	NBP0805-TB04_Dp-A-3	Burke and Robinson (2012)	NaN		1	1	1
-54.734	-62.216	816	9	39	C	NaN	NaN	805	65	NaN	NaN	174	632	65.75	1168	8	32	HOL (<6)	NBP0805-TB04_Modern Balano-1	Burke and Robinson (2012)	NaN		1	1	1
50.43	-46.37	1600	13375	123	C	NaN	NaN	11820	40	NaN	NaN	11523	310	143.75	557	1	33	BA (12.8-14.8)	OK 3	Cao et al. (2007)	NaN		1	1	1
50.43	-46.37	1600	13098	203	C	NaN	NaN	11760	45	NaN	NaN	11178	579	226.5	557	1	33	BA (12.8-14.8)	OK 8	Cao et al. (2007)	NaN		1	1	1
50.43	-46.37	1600	12886	132	C	NaN	NaN	11655	35	NaN	NaN	10975	664	155.75	557	1	33	BA (12.8-14.8)	OKB 36A	Cao et al. (2007)	NaN		1	1	1
50.43	-46.37	1600	13847	98	C	NaN	NaN	12270	30	NaN	NaN	12012	265	91	557	1	33	BA (12.8-14.8)	OKB 53B	Cao et al. (2007)	NaN		1	1	1
50.43	-46.37	1600	13401	114	C	NaN	NaN	12140	30	NaN	NaN	11515	608	131.75	557	1	33	BA (12.8-14.8)	OKB B3	Cao et al. (2007)	NaN		1	1	1
-54.8087	-62.12	1419	14011	103	C	NaN	NaN	13277.5	71.3112	NaN	NaN	12048	1182.37	121.75	1250	8	34	BA (12.8-14.8)	BurdwoodBank1	Chen et al. (2015)	NaN		1	1	1
-54.8095	-62.167	1516	15761	144.5	C	NaN	NaN	14736.2	65.3907	NaN	NaN	13145	1590.3	127.75	1295	8	34	HS1 (15-17.5)	BurdwoodBank2	Chen et al. (2015)	NaN		1	1	1
9	-21.31	973	11400	52	C	NaN	NaN	10695.4	25.854	NaN	NaN	10003	697.817	47.5	838	1	34		EBA1	Chen et al. (2015)	NaN		1	1	1
9	-21.31	973	11480	66.5	C	NaN	NaN	10728.9	29.0165	NaN	NaN	10019	704.719	44	838	1	34		EBA1	Chen et al. (2015)	NaN		1	1	1
9	-21.31	973	14759	80.5	C	NaN	NaN	13417.1	34.1467	NaN	NaN	12364	979.652	68	838	1	34	BA (12.8-14.8)	EBA1	Chen et al. (2015)	NaN		1	1	1
9	-21.31	1829	10646	34.5	C	NaN	NaN	10148.6	24.153	NaN	NaN	9392	731.113	42	764	1	34	EHOL (7-11)	EBA10	Chen et al. (2015)	NaN		1	1	1
9	-21.31	1829	14819	42	C	NaN	NaN	14056.5	36.9758	NaN	NaN	12447	1609.79	68	764	1	34	BA (12.8-14.8)	EBA10	Chen et al. (2015)	NaN		1	1	1
9	-21.31	1829	16517	87	C	NaN	NaN	15212.8	42.7003	NaN	NaN	13662	1544.83	79.25	764	1	34	HS1 (15-17.5)	EBA10	Chen et al. (2015)	NaN		1	1	1
9	-21.31	1829	17367	118	C	NaN	NaN	15725.2	51.2018	NaN	NaN	14275	1440.2	122.25	764	1	34	HS1 (15-17.5)	EBA10	Chen et al. (2015)	NaN		1	1	1
9	-21.31	2100	11785	91	C	NaN	NaN	10873.7	26.4346	NaN	NaN	10133	732.393	67.75	800	1	34	YD (11.8-12.7)	EBA11	Chen et al. (2015)	NaN		1	1	1
9	-21.31	1080	13234	82	C	NaN	NaN	12314.1	31.626	NaN	NaN	11349	952.847	107	829	1	34	BA (12.8-14.8)	EBA2	Chen et al. (2015)	NaN		1	1	1
9	-21.31	1080	14289	76.5	C	NaN	NaN	13107.3	30.8014	NaN	NaN	12334	762.3	58	829	1	34	BA (12.8-14.8)	EBA2	Chen et al. (2015)	NaN		1	1	1
9	-21.31	1080	14516	52	C	NaN	NaN	13140.2	30.9279	NaN	NaN	12428	709.957	45.25	829	1	34	BA (12.8-14.8)	EBA2	Chen et al. (2015)	NaN		1	1	1
9	-21.31	1080	17153	89.5	C	NaN	NaN	15175.6	42.5026	NaN	NaN	14158	1044.53	95.5	829	1	34	HS1 (15-17.5)	EBA2	Chen et al. (2015)	NaN		1	1	1
9	-21.31	1080	17818	78	C	NaN	NaN	15662.9	45.1609	NaN	NaN	14534	1122.28	88.75	829	1	34		EBA2	Chen et al. (2015)	NaN		1	1	1
9	-21.31	1413	11552	44	C	NaN	NaN	10999.1	28.4298	NaN	NaN	10030	964.812	38.7501	786	1	34		EBA3	Chen et al. (2015)	NaN		1	1	1
9	-21.31	1366	14516	56.5	C	NaN	NaN	13219	33.3147	NaN	NaN	12428	787.824	47.5	786	1	34	BA (12.8-14.8)	EBA4	Chen et al. (2015)	NaN		1	1	1
9	-21.31	1366	14893	70.5	C	NaN	NaN	13455.6	34.3107	NaN	NaN	12508	946.519	76.9999	786	1	34		EBA4	Chen et al. (2015)	NaN		1	1	1
9	-21.31	1366	15069	94.5	C	NaN	NaN	13681.8	35.2905	NaN	NaN	12636	1039.89	87.5	786	1	34	HS1 (15-17.5)	EBA4	Chen et al. (2015)	NaN		1	1	1
9	-21.31	1366	25287	87	C	NaN	NaN	22182.7	95.3283	NaN	NaN	21030	1162.45	142.5	786	1	34	preLGM (25-30)	EBA4	Chen et al. (2015)	NaN		1	1	1
9	-21.31	1354	14846	72	C	NaN	NaN	13598.4	37.109	NaN	NaN	12483	1122.33	76.7501	786	1	34	BA (12.8-14.8)	EBA5	Chen et al. (2015)	NaN		1	1	1
9	-21.31	1380	15925	86.5	C	NaN	NaN	14606.5	39.5958	NaN	NaN	13254	1346.52	78.5	786	1	34	HS1 (15-17.5)	EBA6	Chen et al. (2015)	NaN		1	1	1
9	-21.31	1366	15952	72	C	NaN	NaN	14537.5	41.7108	NaN	NaN	13269	1260.37	72.5	786	1	34	HS1 (15-17.5)	EBA7	Chen et al. (2015)	NaN		1	1	1
9	-21.31	1431	16446	66	C	NaN	NaN	14981.3	38.8944	NaN	NaN	13625	1356.4	67	786	1	34	HS1 (15-17.5)	EBA8	Chen et al. (2015)	NaN		1	1	1
9	-21.31	1545	14609	74	C	NaN	NaN	13404.3	31.9615	NaN	NaN	12470	949.708	51.9999	753	1	34	BA (12.8-14.8)	EBA9	Chen et al. (2015)	NaN		1	1	1
9	-21.31	1545	14967	52.5	C	NaN	NaN	13770.5	40.1427	NaN	NaN	12560	1208.09	66	753	1	34	HS1 (15-17.5)	EBA9	Chen et al. (2015)	NaN		1	1	1
9	-21.31	1545	15378	53.5	C	NaN	NaN	14281.5	38.026	NaN	NaN	12895	1391.26	62.5	753	1	34	HS1 (15-17.5)	EBA9	Chen et al. (2015)	NaN		1	1	1
9	-21.31	1545	15451	51.5	C	NaN	NaN	14382	38.5045	NaN	NaN	12915	1461.92	59.75	753	1	34	HS1 (15-17.5)	EBA9	Chen et al. (2015)	NaN		1	1	1
6	-27	749	267	49.5	C	NaN	NaN	1204.09	15.3978	NaN	NaN	163	1023.11	51.25	838	1	34	HOL (<6)	EBB1	Chen et al. (2015)	NaN		1	1	1
6	-27	845	733	64	C	NaN	NaN	1636.39	19.2036	NaN	NaN	853	792.356	61.75	860	1	34	HOL (<6)	EBB2	Chen et al. (2015)	NaN		1	1	1
6	-27	845	21088	63	C	NaN	NaN	18306.2	58.8354	NaN	NaN	17523	786.797	80	860	1	34	LGM (19-21.8)	EBB2	Chen et al. (2015)	NaN		1	1	1
6	-27	845	23781	102.5	C	NaN	NaN	20617.1	62.7578	NaN	NaN	19699	905.523	189.5	860	1	34		EBB2	Chen et al. (2015)	NaN		1	1	1
6	-27	1162	16980	72	C	NaN	NaN	15080.5	42.0026	NaN	NaN	13926	1145.46	94.2499	834	1	34	HS1 (15-17.5)	EBB3	Chen et al. (2015)	NaN		1	1	1
6	-27	1264	15955	59.5	C	NaN	NaN	14362.7	38.4124	NaN	NaN	13272	1084.61	65.5	783	1	34	HS1 (15-17.5)	EBB4	Chen et al. (2015)	NaN		1	1	1
6	-27	1264	16458	113.5	C	NaN	NaN	15007.3	36.419	NaN	NaN	13631	1375.13	92.75	783	1	34	HS1 (15-17.5)	EBB4	Chen et al. (2015)	NaN		1	1	1
6	-27	1966	2267	11.5	C	NaN	NaN	2842.25	16.5924	NaN	NaN	2187	654.327	26.75	760	1	34	HOL (<6)	EBB5	Chen et al. (2015)	NaN		1	1	1
6	-27	1966	12850	42.5	C	NaN	NaN	11823.4	28.0017	NaN	NaN	10989	863.372	52.5	760	1	34	BA (12.8-14.8)	EBB5	Chen et al. (2015)	NaN		1	1	1
6	-27	1966	14180	45	C	NaN	NaN	13017.5	30.4588	NaN	NaN	12287	731.879	47.75	760	1	34	BA (12.8-14.8)	EBB5	Chen et al. (2015)	NaN		1	1	1
6	-27	1966	16176	74	C	NaN	NaN	15149	42.3626	NaN	NaN	13421	1724.41	72.75	760	1	34	HS1 (15-17.5)	EBB5	Chen et al. (2015)	NaN		1	1	1
6	-27	1985	2273	10.5	C	NaN	NaN	2874.36	17.8077	NaN	NaN	2172	694.279	27	760	1	34	HOL (<6)	EBB6	Chen et al. (2015)	NaN		1	1	1
6	-27	1985	13429	29	C	NaN	NaN	12325.3	27.9441	NaN	NaN	11540	779.835	48.75	760	1	34	BA (12.8-14.8)	EBB6	Chen et al. (2015)	NaN		1	1	1
6	-27	1985	14172	43	C	NaN	NaN	12981	28.2994	NaN	NaN	12280	700.005	46.25	760	1	34	BA (12.8-14.8)	EBB6	Chen et al. (2015)	NaN		1	1	1
6	-27	1985	14221	47.5	C	NaN	NaN	13132	28.8364	NaN	NaN	12312	823.629	47	760	1	34	BA (12.8-14.8)	EBB6	Chen et al. (2015)	NaN		1	1	1
6	-27	1985	14388	27.5	C	NaN	NaN	13239.8	35.4888	NaN	NaN	12396	842.932	42.25	760	1	34	BA (12.8-14.8)	EBB6	Chen et al. (2015)	NaN		1	1	1
6	-27	2814	10382	24.5	C	NaN	NaN	9863.91	23.3119	NaN	NaN	9219.6	645.795	34.75	896	1	34	EHOL (7-11)	EBB7	Chen et al. (2015)	NaN		1	1	1
15.5	-51	1492	6798	34.5	C	NaN	NaN	6450.19	19.7239	NaN	NaN	5995.4	471.955	40.75	722	1	34		GRM1	Chen et al. (2015)	NaN		1	1	1
15.5	-51	1544	13972	46.5	C	NaN	NaN	12848.7	33.8022	NaN	NaN	12003	812.662	62.25	722	1	34	BA (12.8-14.8)	GRM2	Chen et al. (2015)	NaN		1	1	1
-60.5625	-65.9567	983	15170	88	C	NaN	NaN	14061.2	55.4957	NaN	NaN	12723	1339.21	97	1245	8	34	HS1 (15-17.5)	InterimSeamount1	Chen et al. (2015)	NaN		1	1	1
-60.6055	-66.0022	1064	14714	122	C	NaN	NaN	13546.2	67.2308	NaN	NaN	12419	1097.89	89.25	1252	8	34	BA (12.8-14.8)	InterimSeamount2	Chen et al. (2015)	NaN		1	1	1
-60.6	-66	1196	15221	72.5	C	NaN	NaN	13941.8	56.9555	NaN	NaN	12759	1178.27	90.7501	1259	8	34	HS1 (15-17.5)	InterimSeamount3	Chen et al. (2015)	NaN		1	1	1
-60.6	-66	1196	16176	57.5	C	NaN	NaN	15012.5	67.6792	NaN	NaN	13421	1587.73	82.75	1259	8	34	HS1 (15-17.5)	InterimSeamount3	Chen et al. (2015)	NaN		1	1	1
-60.6	-66	1196	25896	109	C	NaN	NaN	23506.2	164.856	NaN	NaN	21599	1886.65	259.75	1259	8	34	preLGM (25-30)	InterimSeamount3	Chen et al. (2015)	NaN		1	1	1
-59.7637	-68.9333	981	14143	81	C	NaN	NaN	13319.5	65.3604	NaN	NaN	12257	1065.94	108.25	1198	8	34	BA (12.8-14.8)	SarsSeamount1	Chen et al. (2015)	NaN		1	1	1
-59.7637	-68.9333	981	14177	121.5	C	NaN	NaN	13086.8	55.3011	NaN	NaN	12284	809.794	119.5	1198	8	34	BA (12.8-14.8)	SarsSeamount1	Chen et al. (2015)	NaN		1	1	1
-59.7637	-68.9333	981	14609	74	C	NaN	NaN	13546.2	67.2308	NaN	NaN	12470	1092.89	77.75	1198	8	34	BA (12.8-14.8)	SarsSeamount1	Chen et al. (2015)	NaN		1	1	1
-59.7637	-68.9333	981	14889	79.5	C	NaN	NaN	13468.5	66.5837	NaN	NaN	12507	962.666	97.5001	1198	8	34		SarsSeamount1	Chen et al. (2015)	NaN		1	1	1
-59.7637	-68.9333	981	16851	168	C	NaN	NaN	15456.7	79.7798	NaN	NaN	13844	1596.89	148.5	1198	8	34	HS1 (15-17.5)	SarsSeamount1	Chen et al. (2015)	NaN		1	1	1
-59.7985	-68.9603	1701	12564	62	C	NaN	NaN	11708.7	58.6602	NaN	NaN	10472	1191.1	86.25	1326	8	34	YD (11.8-12.7)	SarsSeamount2	Chen et al. (2015)	NaN		1	1	1
-59.7985	-68.9603	1701	13113	65.5	C	NaN	NaN	12358.9	46.7687	NaN	NaN	11220	1156.19	105.5	1326	8	34	BA (12.8-14.8)	SarsSeamount2	Chen et al. (2015)	NaN		1	1	1
-59.7985	-68.9603	1701	13158	67	C	NaN	NaN	12358.9	24.3197	NaN	NaN	11244	1085.68	70.25	1326	8	34	BA (12.8-14.8)	SarsSeamount2	Chen et al. (2015)	NaN		1	1	1
-59.7985	-68.9603	1701	14051	81	C	NaN	NaN	13344.9	71.9121	NaN	NaN	12132	1205.76	117.5	1326	8	34	BA (12.8-14.8)	SarsSeamount2	Chen et al. (2015)	NaN		1	1	1
-59.7985	-68.9603	1701	14063	60.5	C	NaN	NaN	13421.4	57.6531	NaN	NaN	12159	1262.86	102.25	1326	8	34	BA (12.8-14.8)	SarsSeamount2	Chen et al. (2015)	NaN		1	1	1
-59.7985	-68.9603	1701	14103	57.5	C	NaN	NaN	13421.4	57.6531	NaN	NaN	12232	1202.86	96	1326	8	34	BA (12.8-14.8)	SarsSeamount2	Chen et al. (2015)	NaN		1	1	1
-59.7985	-68.9603	1701	14783	65.5	C	NaN	NaN	13757.1	53.4346	NaN	NaN	12386	1325.8	80	1326	8	34	BA (12.8-14.8)	SarsSeamount2	Chen et al. (2015)	NaN		1	1	1
-60.1817	-57.8333	806	18047	168.5	C	NaN	NaN	16564	104.202	NaN	NaN	14703	1851.99	217.5	1252	8	34		ShackletonFractureZone1	Chen et al. (2015)	NaN		1	1	1
-60.1817	-57.8333	806	22578	81	C	NaN	NaN	20754.2	106.397	NaN	NaN	18739	2029.27	138	1252	8	34		ShackletonFractureZone1	Chen et al. (2015)	NaN		1	1	1
-60.1817	-57.8333	823	19631	189	C	NaN	NaN	18120.1	111.144	NaN	NaN	16360	1824.61	194	1252	8	34	LGM (19-21.8)	ShackletonFractureZone2	Chen et al. (2015)	NaN		1	1	1
-60.1817	-57.8333	823	20367	58	C	NaN	NaN	18959.6	89.3501	NaN	NaN	16830	2126.1	108.25	1252	8	34	LGM (19-21.8)	ShackletonFractureZone2	Chen et al. (2015)	NaN		1	1	1
-60.1817	-57.8333	823	27159	122	C	NaN	NaN	24946.9	170.343	NaN	NaN	22735	2177.43	265	1252	8	34	preLGM (25-30)	ShackletonFractureZone2	Chen et al. (2015)	NaN		1	1	1
15	-48	795	10414	80	C	NaN	NaN	9795.64	24.4743	NaN	NaN	9237.4	558.898	61.25	778	1	34	EHOL (7-11)	VAY1	Chen et al. (2015)	NaN		1	1	1
15	-48	795	12449	55.5	C	NaN	NaN	11174.8	24.2152	NaN	NaN	10379	774.601	68.5	778	1	34	YD (11.8-12.7)	VAY1	Chen et al. (2015)	NaN		1	1	1
15	-48	795	14938	50.5	C	NaN	NaN	13464.2	30.054	NaN	NaN	12532	925.668	58.7499	778	1	34		VAY1	Chen et al. (2015)	NaN		1	1	1
15	-48	795	23008	157.5	C	NaN	NaN	20219.2	64.702	NaN	NaN	19123	1091.17	191.5	778	1	34		VAY1	Chen et al. (2015)	NaN		1	1	1
15	-48	1612	692	8.5	C	NaN	NaN	1463.95	16.386	NaN	NaN	803	666.086	25	736	1	34	HOL (<6)	VAY1	Chen et al. (2015)	NaN		1	1	1
15	-48	1827	13369	61.5	C	NaN	NaN	12181.3	29.2774	NaN	NaN	11524	674.491	76.5	737	1	34	BA (12.8-14.8)	VAY2	Chen et al. (2015)	NaN		1	1	1
11	-45	1146	12039	51	C	NaN	NaN	10889.3	26.4858	NaN	NaN	10315	566.445	42	819	1	34	YD (11.8-12.7)	VEM1	Chen et al. (2015)	NaN		1	1	1
11	-45	1097	18614	82.5	C	NaN	NaN	16420	46.5232	NaN	NaN	15174	1213.82	116.25	819	1	34		VEM2	Chen et al. (2015)	NaN		1	1	1
11	-45	1097	20106	106.5	C	NaN	NaN	17687.3	54.4733	NaN	NaN	16629	1052.61	101	819	1	34	LGM (19-21.8)	VEM2	Chen et al. (2015)	NaN		1	1	1
11	-45	1097	22311	84	C	NaN	NaN	19652.4	69.5699	NaN	NaN	18345	1298.68	139.75	819	1	34		VEM2	Chen et al. (2015)	NaN		1	1	1
11	-45	1097	22414	80.5	C	NaN	NaN	19450.9	76.8925	NaN	NaN	18516	934.93	150.5	819	1	34		VEM2	Chen et al. (2015)	NaN		1	1	1
11	-45	1296	372	29	C	NaN	NaN	1061.65	16.9608	NaN	NaN	334	729.041	26.5	779	1	34	HOL (<6)	VEM3	Chen et al. (2015)	NaN		1	1	1
11	-45	1327	474	30	C	NaN	NaN	1202.23	14.9278	NaN	NaN	380	819.947	54.5	779	1	34	HOL (<6)	VEM4	Chen et al. (2015)	NaN		1	1	1
11	-45	1296	11391	57.5	C	NaN	NaN	10455.6	25.0939	NaN	NaN	9959.4	463.698	49.25	779	1	34		VEM5	Chen et al. (2015)	NaN		1	1	1
11	-45	1296	12468	98	C	NaN	NaN	11334.5	29.6421	NaN	NaN	10417	898.118	78.5	779	1	34	YD (11.8-12.7)	VEM5	Chen et al. (2015)	NaN		1	1	1
11	-45	1657	8602	17.5	C	NaN	NaN	8405.73	19.4421	NaN	NaN	7855.6	565.306	43.75	752	1	34	EHOL (7-11)	VEM6	Chen et al. (2015)	NaN		1	1	1
11	-45	1657	10499	22	C	NaN	NaN	9996.65	25.0944	NaN	NaN	9283.2	710.704	47.25	752	1	34	EHOL (7-11)	VEM6	Chen et al. (2015)	NaN		1	1	1
11	-45	1657	11358	34	C	NaN	NaN	10592.6	30.0299	NaN	NaN	9985	622.302	46.5	752	1	34		VEM6	Chen et al. (2015)	NaN		1	1	1
11	-45	1657	11742	26.5	C	NaN	NaN	11068.9	28.6779	NaN	NaN	10105	957.128	42.4999	752	1	34		VEM6	Chen et al. (2015)	NaN		1	1	1
11	-45	1657	12149	25.5	C	NaN	NaN	11344.4	28.0298	NaN	NaN	10361	982.128	34.5	752	1	34	YD (11.8-12.7)	VEM6	Chen et al. (2015)	NaN		1	1	1
11	-45	1657	12238	28.5	C	NaN	NaN	11390.7	28.1918	NaN	NaN	10367	1001.81	37.4999	752	1	34	YD (11.8-12.7)	VEM6	Chen et al. (2015)	NaN		1	1	1
11	-45	1657	12291	75	C	NaN	NaN	11374.2	28.1337	NaN	NaN	10415	988.822	40.25	752	1	34	YD (11.8-12.7)	VEM6	Chen et al. (2015)	NaN		1	1	1
11	-45	1578	8962	18.5	C	NaN	NaN	8458.51	24.175	NaN	NaN	7961.6	484.758	38.75	752	1	34	EHOL (7-11)	VEM7	Chen et al. (2015)	NaN		1	1	1
11	-45	1648	10813	25	C	NaN	NaN	10103.3	24.0171	NaN	NaN	9588.8	521.136	37.25	752	1	34	EHOL (7-11)	VEM8	Chen et al. (2015)	NaN		1	1	1
9.216	-21.316	1080	5427	145	C	NaN	NaN	5425	59	NaN	NaN	4629.2	725	151	829	1	35	HOL (<6)	f0001carcs001	Chen et al. (2020)	NaN		1	1	1
9.216	-21.316	1080	15157	230	C	NaN	NaN	13747	78	NaN	NaN	12713	1031	177.75	829	1	35	HS1 (15-17.5)	f0001carcs016	Chen et al. (2020)	NaN		1	1	1
9.216	-21.316	1080	15983	284	C	NaN	NaN	14392	81	NaN	NaN	13294	1088	214.75	829	1	35	HS1 (15-17.5)	f0001carcs024	Chen et al. (2020)	NaN		1	1	1
9.216	-21.316	1080	12428	304	C	NaN	NaN	11329	67	NaN	NaN	10358	886	239	829	1	35	YD (11.8-12.7)	f0001carcs027	Chen et al. (2020)	NaN		1	1	1
9.216	-21.316	1080	16003	220	C	NaN	NaN	14435	81	NaN	NaN	13311	1119	176.75	829	1	35	HS1 (15-17.5)	f0001carcs044	Chen et al. (2020)	NaN		1	1	1
9.216	-21.316	1080	18654	198	C	NaN	NaN	16606	96	NaN	NaN	15268	1299	229.75	829	1	35		f0001carcs051	Chen et al. (2020)	NaN		1	1	1
9.216	-21.316	1080	15583	167	C	NaN	NaN	14128	83	NaN	NaN	12997	1118	145.75	829	1	35	HS1 (15-17.5)	f0001carcs061	Chen et al. (2020)	NaN		1	1	1
9.216	-21.316	1080	16801	138	C	NaN	NaN	14972	88	NaN	NaN	13827	1140	127.25	829	1	35	HS1 (15-17.5)	f0001carcs065	Chen et al. (2020)	NaN		1	1	1
0.459	-90.712	627	16581	92	C	NaN	NaN	15059	88	NaN	NaN	13711	1347	110.75	1104	4	35	HS1 (15-17.5)	MV1007-DO3-2-1	Chen et al. (2020)	NaN		1	1	1
0.459	-90.712	627	16622	92	C	NaN	NaN	15009	89	NaN	NaN	13742	1270	110.5	1104	4	35	HS1 (15-17.5)	MV1007-DO3-2-13	Chen et al. (2020)	NaN		1	1	1
0.459	-90.712	627	16672	109	C	NaN	NaN	15140	89	NaN	NaN	13775	1372	112.5	1104	4	35	HS1 (15-17.5)	MV1007-DO3-2-15	Chen et al. (2020)	NaN		1	1	1
0.459	-90.712	627	16383	106	C	NaN	NaN	14919	88	NaN	NaN	13590	1337	119	1104	4	35	HS1 (15-17.5)	MV1007-DO3-2-2	Chen et al. (2020)	NaN		1	1	1
0.459	-90.712	627	16535	93	C	NaN	NaN	15021	88	NaN	NaN	13674	1340	111.25	1104	4	35	HS1 (15-17.5)	MV1007-DO3-2-3	Chen et al. (2020)	NaN		1	1	1
0.459	-90.712	627	14458	92	C	NaN	NaN	13379	79	NaN	NaN	12406	966	87.75	1104	4	35	BA (12.8-14.8)	MV1007-DO3-2-4	Chen et al. (2020)	NaN		1	1	1
0.459	-90.712	627	16285	150	C	NaN	NaN	14650	86	NaN	NaN	13502	1141	137.75	1104	4	35	HS1 (15-17.5)	MV1007-DO3-4-20	Chen et al. (2020)	NaN		1	1	1
0.459	-90.712	627	13654	200	C	NaN	NaN	12943	78	NaN	NaN	11821	1134	206.25	1104	4	35	BA (12.8-14.8)	MV1007-DO3-4-27	Chen et al. (2020)	NaN		1	1	1
0.459	-90.712	627	11231	63	C	NaN	NaN	10740	69	NaN	NaN	9811.2	916	118.75	1104	4	35		MV1007-DO3-4-37	Chen et al. (2020)	NaN		1	1	1
0.459	-90.712	627	17259	127	C	NaN	NaN	15507	91	NaN	NaN	14150	1320	150.25	1104	4	35	HS1 (15-17.5)	MV1007-DO3-4-42	Chen et al. (2020)	NaN		1	1	1
0.459	-90.712	627	15086	118	C	NaN	NaN	13852	80	NaN	NaN	12647	1196	125.75	1104	4	35	HS1 (15-17.5)	MV1007-DO3-4-51	Chen et al. (2020)	NaN		1	1	1
0.459	-90.712	627	16593	91	C	NaN	NaN	15082	89	NaN	NaN	13720	1362	111	1104	4	35	HS1 (15-17.5)	MV1007-DO3-4-52	Chen et al. (2020)	NaN		1	1	1
0.459	-90.712	627	13604	74	C	NaN	NaN	12788	76	NaN	NaN	11792	1019	110.25	1104	4	35	BA (12.8-14.8)	MV1007-DO3-4-53	Chen et al. (2020)	NaN		1	1	1
0.459	-90.712	627	13873	74	C	NaN	NaN	13079	77	NaN	NaN	12045	1062	104	1104	4	35	BA (12.8-14.8)	MV1007-DO3-4-55	Chen et al. (2020)	NaN		1	1	1
0.459	-90.712	627	16153	129	C	NaN	NaN	14559	85	NaN	NaN	13406	1146	126.25	1104	4	35	HS1 (15-17.5)	MV1007-DO3-4-59	Chen et al. (2020)	NaN		1	1	1
0.459	-90.712	627	14467	114	C	NaN	NaN	13400	79	NaN	NaN	12409	986	91	1104	4	35	BA (12.8-14.8)	MV1007-DO3-4-60	Chen et al. (2020)	NaN		1	1	1
0.459	-90.712	627	12178	70	C	NaN	NaN	11275	71	NaN	NaN	10376	903	75.75	1104	4	35	YD (11.8-12.7)	MV1007-DO3-5-16	Chen et al. (2020)	NaN		1	1	1
0.459	-90.712	627	16710	111	C	NaN	NaN	15158	90	NaN	NaN	13795	1370	112.25	1104	4	35	HS1 (15-17.5)	MV1007-DO3-5-37	Chen et al. (2020)	NaN		1	1	1
0.459	-90.712	627	145	17	C	NaN	NaN	975	50	NaN	NaN	156	820	63.75	1104	4	35	HOL (<6)	MV1007-DO9-19	Chen et al. (2020)	NaN		1	1	1
0.787	-91.304	589	11843	68	C	NaN	NaN	10920	69	NaN	NaN	10206	735	86.5	1104	4	35	YD (11.8-12.7)	MV1007-DO9-2	Chen et al. (2020)	NaN		1	1	1
-0.371	-90.815	421	2942	55	C	NaN	NaN	3673	53	NaN	NaN	2827	835	70	927	4	35	HOL (<6)	NA064-117-01-C-2B	Chen et al. (2020)	NaN		1	1	1
-0.371	-90.815	419	2517	21	C	NaN	NaN	3343	53	NaN	NaN	2488	859	56.25	927	4	35	HOL (<6)	NA064-118-1-C-2A	Chen et al. (2020)	NaN		1	1	1
-0.371	-90.815	419	3101	41	C	NaN	NaN	3787	53	NaN	NaN	2934	844	59.75	927	4	35	HOL (<6)	NA064-118-1-C-2B	Chen et al. (2020)	NaN		1	1	1
-1.33333	-11.9	600	3445	37	TS	3770	30	4860	25	1090	39	3207	1629	52.5	836	2	36	HOL (<6)	RC24-08	Cleroux et al. (2011)	0.580552	Low sed rate <2cm/kyr *, Not benthics - could just be mixed layer vs mixed layer	0	0	0
-1.33333	-11.9	600	10287	63	TS	9655	50	9605	30	-50	58	9182.4	428	85.25	836	2	36	EHOL (7-11)	RC24-08	Cleroux et al. (2011)	2.52746	Not benthics - could just be mixed layer vs mixed layer	0	0	0
-1.33333	-11.9	600	12780	32	TS	11535	35	11975	35	440	49	10912	1080	76.5	836	2	36	BA (12.8-14.8)	RC24-08	Cleroux et al. (2011)	2.9734	Not benthics - could just be mixed layer vs mixed layer	0	0	0
-1.33333	-11.9	600	13600	60	TS	12325	50	12780	40	455	64	11772	1010	80	836	2	36	BA (12.8-14.8)	RC24-08	Cleroux et al. (2011)	3.52941	Not benthics - could just be mixed layer vs mixed layer	0	0	0
-1.33333	-11.9	600	15402	68	TS	13550	50	13695	45	145	67	12903	796	69.75	836	2	36	HS1 (15-17.5)	RC24-08	Cleroux et al. (2011)	3.63589	Not benthics - could just be mixed layer vs mixed layer	0	0	0
-1.33333	-11.9	600	15717	67	TS	13790	50	14150	50	360	71	13110	1039	81.5	836	2	36	HS1 (15-17.5)	RC24-08	Cleroux et al. (2011)	3.81752	Not benthics - could just be mixed layer vs mixed layer	0	0	0
-1.33333	-11.9	600	16563	96	TS	14440	70	14640	70	200	99	13696	940	99	836	2	36	HS1 (15-17.5)	RC24-08	Cleroux et al. (2011)	4.10554	Not benthics - could just be mixed layer vs mixed layer	0	0	0
-1.33333	-11.9	600	19008	116	TS	16570	100	16790	60	220	117	15766	1027	140.5	836	2	36	LGM (19-21.8)	RC24-08	Cleroux et al. (2011)	4.31397	Not benthics - could just be mixed layer vs mixed layer	0	0	0
48.608	150.428	1980	4682	52	S	5190	35	6840	50	1650	61	4132	2689	56.5	2087	3	37	HOL (<6)	Nesmeyanov25-1 GGC15	Cook and Keigwin (2015)	6.19393		1	1	0
48.608	150.428	1980	10718	86	S	10450	50	11350	70	900	86	9484.4	1865	102.5	2087	3	37	EHOL (7-11)	Nesmeyanov25-1 GGC15	Cook and Keigwin (2015)	6.71767		1	1	0
48.608	150.428	1980	16339	89	S	14750	70	15850	90	1100	114	13553	2300	115	2087	3	37	HS1 (15-17.5)	Nesmeyanov25-1 GGC15	Cook and Keigwin (2015)	8.01763		1	1	0
48.752	150.431	1700	11049	77	S	10650	50	11600	55	950	74	9543	2000	80.5	2087	3	38	EHOL (7-11)	Nesmeyanov25-1 GGC18	Cook and Keigwin (2015)	12.9423		1	1	1
48.752	150.431	1700	14035	98	S	13150	65	14100	50	950	82	12096	1984	107.75	2087	3	38	BA (12.8-14.8)	Nesmeyanov25-1 GGC18	Cook and Keigwin (2015)	11.8988		1	1	1
48.874	150.432	1510	11205	47	S	10800	45	11750	60	950	75	9775	1981	103	2030	3	39		Nesmeyanov25-1 GGC20	Cook and Keigwin (2015)	12.7622		1	1	1
48.874	150.432	1510	14453	117	S	13400	50	14450	85	1050	99	12404	2041	97	2030	3	39	BA (12.8-14.8)	Nesmeyanov25-1 GGC20	Cook and Keigwin (2015)	12.385		1	1	1
49.601	150.18	995	10859	95	S	10530	60	11650	85	1120	104	9569.8	2075	99.5	1771	3	40	EHOL (7-11)	Nesmeyanov25-1 GGC27	Cook and Keigwin (2015)	3.82171		1	1	0
49.601	150.18	995	13541	65	S	12760	55	13900	90	1140	105	11737	2200	123	1771	3	40	BA (12.8-14.8)	Nesmeyanov25-1 GGC27	Cook and Keigwin (2015)	3.47094		1	1	0
51.05	168.097	3700	13589	60	S	12800	50	13850	110	1050	121	11729	2096	131.5	2035	3	41	BA (12.8-14.8)	RNDB GGC15	Cook and Keigwin (2015)	2.13408		1	1	0
51.112	167.895	2804	14110	120	S	13200	75	14900	55	1700	93	12240	2678	120.75	2069	3	42	BA (12.8-14.8)	RNDB GGC5	Cook and Keigwin (2015)	2.19702		1	1	0
51.112	167.895	2804	21979	132	S	19450	120	21900	160	2450	200	18012	3871	200.25	2069	3	42		RNDB GGC5	Cook and Keigwin (2015)	3.41235		1	1	0
51.073	168.975	3225	13935	72	S	13080	60	14400	85	1320	104	12028	2360	103	2058	3	43	BA (12.8-14.8)	RNDB PC11	Cook and Keigwin (2015)	5.13097		1	1	0
51.073	168.975	3225	14019	102	S	13140	70	14200	80	1060	106	12063	2096	127.5	2058	3	43	BA (12.8-14.8)	RNDB PC11	Cook and Keigwin (2015)	5.38555		1	1	0
51.073	168.975	3225	16602	114	S	14950	85	16650	110	1700	139	13727	2925	133.25	2058	3	43	HS1 (15-17.5)	RNDB PC11	Cook and Keigwin (2015)	6.50524		1	1	0
49.725	168.312	2329	13958	90	S	13100	70	14800	65	1700	96	12003	2748	107.25	2033	3	44	BA (12.8-14.8)	RNDB PC13	Cook and Keigwin (2015)	3.79711		1	1	0
49.725	168.312	2329	14918	142	S	13660	90	16000	85	2340	124	12518	3467	132	2033	3	44		RNDB PC13	Cook and Keigwin (2015)	4.0555		1	1	0
49.725	168.312	2329	17793	79	S	15900	60	17350	90	1450	108	14509	2827	116.25	2033	3	44		RNDB PC13	Cook and Keigwin (2015)	4.43995		1	1	0
49.725	168.312	2329	19555	140	S	17500	110	20100	160	2600	194	16222	3878	209.75	2033	3	44	LGM (19-21.8)	RNDB PC13	Cook and Keigwin (2015)	5.11378		1	1	0
53.707	165.013	3960	13661.5	41	S	12860	35	13750	80	890	87	11835	1927	88.5	2087	3	45	BA (12.8-14.8)	VINO19-4 GGC17	Cook and Keigwin (2015)	6.58786		1	1	0
50.42	167.732	3300	13691	138	S	12880	115	13260	110	380	159	11836	1421	174	2024	3	46	BA (12.8-14.8)	VINO19-4 GGC37	Cook and Keigwin (2015)	4.01724		1	1	0
50.42	167.732	3300	13722	118	S	12910	95	13280	115	370	149	11801	1414	162.25	2024	3	46	BA (12.8-14.8)	VINO19-4 GGC37	Cook and Keigwin (2015)	3.57091		1	1	0
-6.1	147.6	150	12449	32	S	NaN	NaN	11300	110	NaN	NaN	10379	899	123.75	577	4	47	YD (11.8-12.7)	papua	Cutler et al., 2004	NaN		1	1	1
-6.1	147.6	150	12542	65	S	NaN	NaN	11410	63	NaN	NaN	10505	905	92	577	4	47	YD (11.8-12.7)	papua	Cutler et al., 2004	NaN		1	1	1
-6.1	147.6	150	12938	63	S	NaN	NaN	11805	80	NaN	NaN	11046	780	91.5	577	4	47	BA (12.8-14.8)	papua	Cutler et al., 2004	NaN		1	1	1
-6.1	147.6	150	14611	26	S	NaN	NaN	13270	120	NaN	NaN	12470	800	120.75	577	4	47	BA (12.8-14.8)	papua	Cutler et al., 2004	NaN		1	1	1
-6.1	147.6	150	36790	91	S	NaN	NaN	33580	320	NaN	NaN	32445	1120	338.75	577	4	47		papua	Cutler et al., 2004	NaN		1	1	1
-15.6	167	150	11045	16	S	NaN	NaN	10810	40	NaN	NaN	9547	1250	48.25	571	4	47		tasmaloum	Cutler et al., 2004	NaN		1	1	1
-15.6	167	150	11449	19	S	NaN	NaN	10990	40	NaN	NaN	10012	970	45.75	571	4	47		tasmaloum	Cutler et al., 2004	NaN		1	1	1
-15.6	167	150	12151	27	S	NaN	NaN	11250	35	NaN	NaN	10360	887	40.5	571	4	47	YD (11.8-12.7)	tasmaloum	Cutler et al., 2004	NaN		1	1	1
-15.6	167	150	12157	40	S	NaN	NaN	11276	90	NaN	NaN	10354	908	91.75	571	4	47	YD (11.8-12.7)	tasmaloum	Cutler et al., 2004	NaN		1	1	1
-15.6	167	150	12247	22	S	NaN	NaN	11460	48	NaN	NaN	10361	1074	53	571	4	47	YD (11.8-12.7)	tasmaloum	Cutler et al., 2004	NaN		1	1	1
-15.6	167	150	12640	10	S	NaN	NaN	11630	40	NaN	NaN	10596	1035	44	571	4	47	YD (11.8-12.7)	tasmaloum	Cutler et al., 2004	NaN		1	1	1
-15.6	167	150	12740	24	S	NaN	NaN	11746	100	NaN	NaN	10783	960	127.5	571	4	47		tasmaloum	Cutler et al., 2004	NaN		1	1	1
-15.6	167	150	12886	32	S	NaN	NaN	12140	60	NaN	NaN	10975	1150	69	571	4	47	BA (12.8-14.8)	tasmaloum	Cutler et al., 2004	NaN		1	1	1
-15.6	167	150	13287	83	S	NaN	NaN	12486	70	NaN	NaN	11372	1072	115.5	571	4	47	BA (12.8-14.8)	tasmaloum	Cutler et al., 2004	NaN		1	1	1
-15.6	167	150	13959	21	S	NaN	NaN	13033	80	NaN	NaN	12002	1018	85.75	571	4	47	BA (12.8-14.8)	tasmaloum	Cutler et al., 2004	NaN		1	1	1
-15.6	167	150	14042	27	S	NaN	NaN	13396	90	NaN	NaN	12112	1280	107	571	4	47	BA (12.8-14.8)	tasmaloum	Cutler et al., 2004	NaN		1	1	1
-15.6	167	150	14057	17	S	NaN	NaN	13250	35	NaN	NaN	12145	1103	56	571	4	47	BA (12.8-14.8)	tasmaloum	Cutler et al., 2004	NaN		1	1	1
-15.6	167	150	14059	29	S	NaN	NaN	13406	64	NaN	NaN	12150	1255	87.75	571	4	47	BA (12.8-14.8)	tasmaloum	Cutler et al., 2004	NaN		1	1	1
-15.6	167	150	14221	20	S	NaN	NaN	13256	70	NaN	NaN	12312	944	72.25	571	4	47	BA (12.8-14.8)	tasmaloum	Cutler et al., 2004	NaN		1	1	1
-15.6	167	150	14259	34	S	NaN	NaN	13500	55	NaN	NaN	12325	1174	65	571	4	47	BA (12.8-14.8)	tasmaloum	Cutler et al., 2004	NaN		1	1	1
-15.6	167	150	14358	33	S	NaN	NaN	13224	105	NaN	NaN	12396	836	108	571	4	47	BA (12.8-14.8)	tasmaloum	Cutler et al., 2004	NaN		1	1	1
-15.6	167	150	14565	22	S	NaN	NaN	13410	40	NaN	NaN	12452	958	49.5	571	4	47	BA (12.8-14.8)	tasmaloum	Cutler et al., 2004	NaN		1	1	1
-15.6	167	150	14866	51	S	NaN	NaN	13661	95	NaN	NaN	12498	1173	108.25	571	4	47		tasmaloum	Cutler et al., 2004	NaN		1	1	1
-15.6	167	150	14870	21	S	NaN	NaN	13390	45	NaN	NaN	12500	892	55	571	4	47		tasmaloum	Cutler et al., 2004	NaN		1	1	1
-15.6	167	150	15278	28	S	NaN	NaN	14040	45	NaN	NaN	12812	1227	66	571	4	47	HS1 (15-17.5)	tasmaloum	Cutler et al., 2004	NaN		1	1	1
-15.6	167	150	19623	34	S	NaN	NaN	18146	90	NaN	NaN	16349	1806	109.5	571	4	47	LGM (19-21.8)	tasmaloum	Cutler et al., 2004	NaN		1	1	1
-15.6	167	150	20385	27	S	NaN	NaN	18260	80	NaN	NaN	16843	1415	90	571	4	47	LGM (19-21.8)	tasmaloum	Cutler et al., 2004	NaN		1	1	1
-15.6	167	150	20559	38	S	NaN	NaN	18916	160	NaN	NaN	17064	1857	168.5	571	4	47	LGM (19-21.8)	tasmaloum	Cutler et al., 2004	NaN		1	1	1
-15.6	167	150	21568	29	S	NaN	NaN	19476	150	NaN	NaN	17806	1669	153.5	571	4	47	LGM (19-21.8)	tasmaloum	Cutler et al., 2004	NaN		1	1	1
-15.6	167	150	6150	14	S	NaN	NaN	6132	50	NaN	NaN	5303	816	56.5	571	4	47		urlepa	Cutler et al., 2004	NaN		1	1	1
-15.6	167	150	6675	20	S	NaN	NaN	6767	65	NaN	NaN	5883	898	72.5	571	4	47		urlepa	Cutler et al., 2004	NaN		1	1	1
-15.6	167	150	6833	18	S	NaN	NaN	6762	48	NaN	NaN	5988.2	763	51.5	571	4	47		urlepa	Cutler et al., 2004	NaN		1	1	1
-15.6	167	150	8719	17	S	NaN	NaN	8647	55	NaN	NaN	7923.2	720	58.25	571	4	47	EHOL (7-11)	urlepa	Cutler et al., 2004	NaN		1	1	1
-15.6	167	150	9680	11	S	NaN	NaN	9272	65	NaN	NaN	8714	551	69.5	571	4	47	EHOL (7-11)	urlepa	Cutler et al., 2004	NaN		1	1	1
-15.6	167	150	9873	17	S	NaN	NaN	9553	80	NaN	NaN	8782.6	755	82.75	571	4	47	EHOL (7-11)	urlepa	Cutler et al., 2004	NaN		1	1	1
-15.6	167	150	10296	22	S	NaN	NaN	9893	68	NaN	NaN	9195.8	701	72.25	571	4	47	EHOL (7-11)	urlepa	Cutler et al., 2004	NaN		1	1	1
-15.6	167	150	10457	21	S	NaN	NaN	9917	50	NaN	NaN	9268.4	659	57.25	571	4	47	EHOL (7-11)	urlepa	Cutler et al., 2004	NaN		1	1	1
-15.6	167	150	11208	24	S	NaN	NaN	10317	65	NaN	NaN	9781.6	543	84.5	571	4	47		urlepa	Cutler et al., 2004	NaN		1	1	1
-15.6	167	150	11221	26	S	NaN	NaN	10482	50	NaN	NaN	9799.8	680	77.25	571	4	47		urlepa	Cutler et al., 2004	NaN		1	1	1
-15.6	167	150	11288	19	S	NaN	NaN	10477	70	NaN	NaN	9935	549	74.25	571	4	47		urlepa	Cutler et al., 2004	NaN		1	1	1
-15.6	167	150	11387	25	S	NaN	NaN	10527	60	NaN	NaN	9949	539	70.5	571	4	47		urlepa	Cutler et al., 2004	NaN		1	1	1
-15.6	167	150	11632	54	S	NaN	NaN	10732	80	NaN	NaN	10064	674	85.75	571	4	47		urlepa	Cutler et al., 2004	NaN		1	1	1
-15.6	167	150	11698	22	S	NaN	NaN	10842	45	NaN	NaN	10083	762	51.75	571	4	47		urlepa	Cutler et al., 2004	NaN		1	1	1
-15.6	167	150	12610	25	S	NaN	NaN	11556	16	NaN	NaN	10530	1020	46.75	571	4	47	YD (11.8-12.7)	urlepa	Cutler et al., 2004	NaN		1	1	1
-15.6	167	150	12630	34	S	NaN	NaN	11727	120	NaN	NaN	10606	1158	128.5	571	4	47	YD (11.8-12.7)	urlepa	Cutler et al., 2004	NaN		1	1	1
-15.6	167	150	15945	35	S	NaN	NaN	14082	85	NaN	NaN	13265	812	93.5	571	4	47	HS1 (15-17.5)	urlepa	Cutler et al., 2004	NaN		1	1	1
-15.6	167	150	21606	51	S	NaN	NaN	19122	150	NaN	NaN	17796	1320	153.75	571	4	47	LGM (19-21.8)	urlepa	Cutler et al., 2004	NaN		1	1	1
-15.6	167	150	22127	49	S	NaN	NaN	19552	150	NaN	NaN	18177	1377	159.75	571	4	47		urlepa	Cutler et al., 2004	NaN		1	1	1
-15.6	167	150	22260	57	S	NaN	NaN	19532	120	NaN	NaN	18291	1235	139	571	4	47		urlepa	Cutler et al., 2004	NaN		1	1	1
-15.6	167	150	22690	70	S	NaN	NaN	20352	140	NaN	NaN	18784	1572	148.25	571	4	47		urlepa	Cutler et al., 2004	NaN		1	1	1
-15.6	167	150	22709	38	S	NaN	NaN	20292	200	NaN	NaN	18786	1505	202.25	571	4	47		urlepa	Cutler et al., 2004	NaN		1	1	1
-45.15	146.28	150	8800	200	C	8486	45	NaN	NaN	NaN	NaN	7985	532	156	600	8	48	EHOL (7-11)	MD97-2106	Dai et al. (2020)	7.72727		1	1	0
-45.15	146.28	150	14980.6	200	C	13009	60	NaN	NaN	NaN	NaN	12576	431	147.75	600	8	48		MD97-2106	Dai et al. (2020)	9.21189		1	1	0
-45.15	146.28	150	18358.6	200	C	16079	70	NaN	NaN	NaN	NaN	15229	948	209	600	8	48		MD97-2106	Dai et al. (2020)	11.0575		1	1	1
-45.15	146.28	3310	8489	288	C	NaN	NaN	8935	20	NaN	NaN	7724.6	1211	227.5	1510	8	48	EHOL (7-11)	MD97-2106	Dai et al. (2020)	7.53917		1	1	0
-45.15	146.28	3310	10844	391	C	NaN	NaN	10815	25	NaN	NaN	9590.2	1254	242.75	1510	8	48	EHOL (7-11)	MD97-2106	Dai et al. (2020)	7.74622		1	1	0
-45.15	146.28	3310	11096	367	C	NaN	NaN	11210	30	NaN	NaN	9632.2	1557	239	1510	8	48	EHOL (7-11)	MD97-2106	Dai et al. (2020)	7.75054		1	1	0
-45.15	146.28	3310	11583	386	C	NaN	NaN	11620	30	NaN	NaN	10015	1566	165	1510	8	48	YD (11.8-12.7)	MD97-2106	Dai et al. (2020)	7.77001		1	1	0
-45.15	146.28	3310	11843	337	C	NaN	NaN	11935	30	NaN	NaN	10206	1745	171.5	1510	8	48	YD (11.8-12.7)	MD97-2106	Dai et al. (2020)	7.93718		1	1	0
-45.15	146.28	3310	11986	312	C	NaN	NaN	11837	41	NaN	NaN	10289	1549	152.75	1510	8	48	YD (11.8-12.7)	MD97-2106	Dai et al. (2020)	8.00934		1	1	0
-45.15	146.28	3310	12582	229	C	NaN	NaN	12700	39	NaN	NaN	10476	2156	121	1510	8	48		MD97-2106	Dai et al. (2020)	8.50421		1	1	0
-45.15	146.28	3310	12906	229	C	NaN	NaN	12650	45	NaN	NaN	11011	1644	271.75	1510	8	48		MD97-2106	Dai et al. (2020)	8.67813		1	1	0
-45.15	146.28	3310	13337	262	C	NaN	NaN	13015	30	NaN	NaN	11483	1532	245.5	1510	8	48	BA (12.8-14.8)	MD97-2106	Dai et al. (2020)	8.77259		1	1	0
-45.15	146.28	3310	13836	299	C	NaN	NaN	13215	45	NaN	NaN	12013	1228	255	1510	8	48	BA (12.8-14.8)	MD97-2106	Dai et al. (2020)	8.96213		1	1	0
-45.15	146.28	3310	14017	304	C	NaN	NaN	13149	43	NaN	NaN	12059	1039	220.75	1510	8	48	BA (12.8-14.8)	MD97-2106	Dai et al. (2020)	8.98908		1	1	0
-45.15	146.28	3310	14560	324	C	NaN	NaN	13686	42	NaN	NaN	12449	1263	152	1510	8	48	BA (12.8-14.8)	MD97-2106	Dai et al. (2020)	9.2033		1	1	0
-45.15	146.28	3310	15158	315	C	NaN	NaN	14450	60	NaN	NaN	12713	1731	206.25	1510	8	48	HS1 (15-17.5)	MD97-2106	Dai et al. (2020)	9.49993		1	1	1
-45.15	146.28	3310	16109	512	C	NaN	NaN	15410	90	NaN	NaN	13382	2011	363.25	1510	8	48	HS1 (15-17.5)	MD97-2106	Dai et al. (2020)	9.80818		1	1	1
-45.15	146.28	3310	16788	566	C	NaN	NaN	15309	50	NaN	NaN	13823	1470	387	1510	8	48	HS1 (15-17.5)	MD97-2106	Dai et al. (2020)	9.9178		1	1	1
-45.15	146.28	3310	17691	657	C	NaN	NaN	16690	70	NaN	NaN	14460	2179	503.25	1510	8	48	HS1 (15-17.5)	MD97-2106	Dai et al. (2020)	10.0051		1	1	1
-45.15	146.28	3310	17956	566	C	NaN	NaN	16660	45	NaN	NaN	14661	1988	395.75	1510	8	48	HS1 (15-17.5)	MD97-2106	Dai et al. (2020)	10.4143		1	1	1
-45.15	146.28	3310	18289	451	C	NaN	NaN	17670	70	NaN	NaN	15105	2600	404.5	1510	8	48		MD97-2106	Dai et al. (2020)	11.1542		1	1	1
-45.15	146.28	3310	18761	361	C	NaN	NaN	17375	50	NaN	NaN	15425	1917	298	1510	8	48	LGM (19-21.8)	MD97-2106	Dai et al. (2020)	11.0602		1	1	1
-45.15	146.28	3310	19740	438	C	NaN	NaN	17889	62	NaN	NaN	16350	1504	364	1510	8	48	LGM (19-21.8)	MD97-2106	Dai et al. (2020)	10.9929		1	1	1
-45.15	146.28	3310	21018	609	C	NaN	NaN	19420	50	NaN	NaN	17479	1934	457.5	1510	8	48	LGM (19-21.8)	MD97-2106	Dai et al. (2020)	10.6575		1	1	1
-45.15	146.28	3310	23335	915	C	NaN	NaN	22340	60	NaN	NaN	19408	2902	770.25	1510	8	48		MD97-2106	Dai et al. (2020)	10.0921		1	1	1
59.5553	-144.154	682	594	74	TS	1650	90	2505	50	855	103	607	1894	134.75	1470	3	49	HOL (<6)	EW0408-84TC	Davies-Walczak et al. (2014)	208.754		1	1	1
59.5553	-144.154	682	1254	76	TS	2340	70	2890	20	550	73	1279	1592	94	1470	3	49	HOL (<6)	EW0408-84TC	Davies-Walczak et al. (2014)	140.351		1	1	1
59.5553	-144.154	682	1702	83	TS	2730	70	3440	60	710	92	1780	1637	95.5	1470	3	49	HOL (<6)	EW0408-84TC	Davies-Walczak et al. (2014)	130.435		1	1	1
59.5553	-144.154	682	2699.5	78	TS	3560	60	4160	20	600	63	2494.5	1644	55.25	1470	3	49	HOL (<6)	EW0408-84TC	Davies-Walczak et al. (2014)	94.0915		1	1	1
59.5553	-144.154	682	3233	87	TS	4000	80	4810	60	810	100	3042	1775	89.5	1470	3	49	HOL (<6)	EW0408-84TC	Davies-Walczak et al. (2014)	94.0303		1	1	1
59.5553	-144.154	682	3651	80	TS	4330	60	5015	45	685	75	3438	1604	76.75	1470	3	49	HOL (<6)	EW0408-84TC	Davies-Walczak et al. (2014)	97.5075		1	1	1
59.5553	-144.154	682	4499	121	TS	4990	90	5840	25	850	93	3994	1804	88	1470	3	49	HOL (<6)	EW0408-84TC	Davies-Walczak et al. (2014)	89.7977		1	1	1
59.5553	-144.154	682	5162	89	TS	5500	70	6345	30	845	76	4513.2	1852	59.25	1470	3	49	HOL (<6)	EW0408-84TC	Davies-Walczak et al. (2014)	87.9504		1	1	1
59.5553	-144.154	682	6170	40	TS	6410	25	7190	25	780	35	5302	1850	52.75	1470	3	49		EW0408-84TC	Davies-Walczak et al. (2014)	81.6856		1	1	1
59.5553	-144.154	682	7773	34	TS	7980	25	8855	35	875	43	6938.4	1904	48.5	1470	3	49	EHOL (7-11)	EW0408-84TC	Davies-Walczak et al. (2014)	71.401		1	1	1
59.5553	-144.154	682	8428.5	84	TS	8610	80	9265	30	655	85	7684.7	1599	104.75	1470	3	49	EHOL (7-11)	EW0408-84TC	Davies-Walczak et al. (2014)	71.7803		1	1	1
59.5553	-144.154	682	8986	144	TS	9020	120	9800	30	780	124	8001.6	1760	100.25	1470	3	49	EHOL (7-11)	EW0408-84TC	Davies-Walczak et al. (2014)	72.8912		1	1	1
59.5553	-144.154	682	9736	94	TS	9660	70	10355	45	695	83	8771.2	1591	73.75	1470	3	49	EHOL (7-11)	EW0408-84TC	Davies-Walczak et al. (2014)	72.4117		1	1	1
59.5553	-144.154	682	10151.5	35	TS	9930	30	10650	25	720	39	8913.6	1730	57.75	1470	3	49	EHOL (7-11)	EW0408-84TC	Davies-Walczak et al. (2014)	71.418		1	1	1
59.5553	-144.154	682	10546	35	TS	10260	25	10915	25	655	35	9314	1582	54	1470	3	49	EHOL (7-11)	EW0408-84TC	Davies-Walczak et al. (2014)	70.1688		1	1	1
59.5553	-144.154	682	10819	84	TS	10410	100	11000	130	590	164	9593.2	1438	140.5	1470	3	49	EHOL (7-11)	EW0408-84TC	Davies-Walczak et al. (2014)	69.6922		1	1	1
59.5553	-144.154	682	11084	40	TS	10600	35	11195	30	595	46	9625.4	1579	54.5	1470	3	49		EW0408-84TC	Davies-Walczak et al. (2014)	68.4771		1	1	1
59.5553	-144.154	682	11350	48	TS	10855	30	11620	30	765	42	9975	1655	53.25	1470	3	49		EW0408-84TC	Davies-Walczak et al. (2014)	67.8414		1	1	1
59.5553	-144.154	682	11708	40	TS	11065	25	12315	35	1250	43	10091	2225	48.25	1470	3	49		EW0408-84TC	Davies-Walczak et al. (2014)	66.6211		1	1	1
59.5553	-144.154	682	11992	44	TS	11250	25	12670	35	1420	43	10291	2372	51	1470	3	49	YD (11.8-12.7)	EW0408-84TC	Davies-Walczak et al. (2014)	65.8773		1	1	1
59.5553	-144.154	682	12436	51	TS	11520	25	12520	30	1000	39	10372	2131	69.5	1470	3	49	YD (11.8-12.7)	EW0408-84TC	Davies-Walczak et al. (2014)	63.8871		1	1	1
59.5553	-144.154	682	13526	43	TS	12705	25	13365	35	660	43	11740	1676	74.25	1470	3	49	BA (12.8-14.8)	EW0408-84TC	Davies-Walczak et al. (2014)	59.1084		1	1	1
59.5553	-144.154	682	13722	55	TS	12810	60	13430	45	620	75	11801	1586	79.5	1470	3	49	BA (12.8-14.8)	EW0408-84TC	Davies-Walczak et al. (2014)	58.592		1	1	1
59.5553	-144.154	682	14019.5	35	TS	13080	30	13695	30	615	42	12064	1622	71	1470	3	49	BA (12.8-14.8)	EW0408-84TC	Davies-Walczak et al. (2014)	57.7767		1	1	1
59.5553	-144.154	682	14191	58	TS	13170	60	13830	35	660	69	12296	1539	58	1470	3	49	BA (12.8-14.8)	EW0408-84TC	Davies-Walczak et al. (2014)	57.7831		1	1	1
59.5553	-144.154	682	14393	70	TS	13310	80	13945	45	635	92	12396	1551	59	1470	3	49	BA (12.8-14.8)	EW0408-84TC	Davies-Walczak et al. (2014)	57.3195		1	1	1
59.5553	-144.154	682	14593	61	TS	13430	45	13740	35	310	57	12464	1283	50	1470	3	49	BA (12.8-14.8)	EW0408-84TC	Davies-Walczak et al. (2014)	56.8766		1	1	1
59.5553	-144.154	682	14747	48	TS	13420	30	13965	30	545	42	12368	1557	62.25	1470	3	49	BA (12.8-14.8)	EW0408-84TC	Davies-Walczak et al. (2014)	56.5878		1	1	1
59.5553	-144.154	682	15219	49	TS	13830	35	14425	30	595	46	12757	1665	63.25	1470	3	49	HS1 (15-17.5)	EW0408-84TC	Davies-Walczak et al. (2014)	55.1942		1	1	1
59.5553	-144.154	682	15901	44	TS	14345	30	14880	35	535	46	13243	1635	56.75	1470	3	49	HS1 (15-17.5)	EW0408-84TC	Davies-Walczak et al. (2014)	53.7073		1	1	1
59.5553	-144.154	682	16276	41	TS	14645	35	15205	45	560	57	13495	1707	65	1470	3	49	HS1 (15-17.5)	EW0408-84TC	Davies-Walczak et al. (2014)	53.8216		1	1	1
59.5553	-144.154	682	16486.5	49	TS	14870	50	15440	60	570	78	13644	1792	75.5	1470	3	49	HS1 (15-17.5)	EW0408-84TC	Davies-Walczak et al. (2014)	54.8327		1	1	1
59.5553	-144.154	682	16586	44	TS	14890	60	15590	90	700	108	13715	1874	101.75	1470	3	49	HS1 (15-17.5)	EW0408-84TC	Davies-Walczak et al. (2014)	60.533		1	1	1
59.5553	-144.154	682	16672	42	TS	15040	80	15640	60	600	100	13775	1866	74.25	1470	3	49	HS1 (15-17.5)	EW0408-84TC	Davies-Walczak et al. (2014)	63.2198		1	1	1
59.5553	-144.154	682	16747	43	TS	14860	80	15680	160	820	179	13810	1870	161.75	1470	3	49	HS1 (15-17.5)	EW0408-84TC	Davies-Walczak et al. (2014)	65.8625		1	1	1
59.5553	-144.154	682	16843	37	TS	15080	40	16110	90	1030	98	13842	2266	95.5	1470	3	49	HS1 (15-17.5)	EW0408-84TC	Davies-Walczak et al. (2014)	68.4557		1	1	1
59.5553	-144.154	682	16916	36	TS	15110	60	15830	60	720	85	13877	1950	72	1470	3	49	HS1 (15-17.5)	EW0408-84TC	Davies-Walczak et al. (2014)	71.1161		1	1	1
59.5553	-144.154	682	16999	48	TS	15160	35	15720	90	560	97	13946	1764	112.25	1470	3	49	HS1 (15-17.5)	EW0408-84TC	Davies-Walczak et al. (2014)	73.7102		1	1	1
0.0218333	-86.4627	150	11760	200	C	10364	150	NaN	NaN	NaN	NaN	10140	223	108	712	4	50	YD (11.8-12.7)	ODP1240	de la Fuente et al. (2015) - LCS updated dataset	10.9694		1	1	1
0.0218333	-86.4627	150	15000	200	C	12701	150	NaN	NaN	NaN	NaN	12595	103	46.5	712	4	50		ODP1240	de la Fuente et al. (2015) - LCS updated dataset	12.0667		1	1	1
0.0218333	-86.4627	150	17600	200	C	15676	150	NaN	NaN	NaN	NaN	14465	1229	199.25	712	4	50	HS1 (15-17.5)	ODP1240	de la Fuente et al. (2015) - LCS updated dataset	14.1477		1	1	1
0.0218333	-86.4627	150	23500	200	C	20705	150	NaN	NaN	NaN	NaN	19564	1215	223.75	712	4	50		ODP1240	de la Fuente et al. (2015) - LCS updated dataset	14.8085		1	1	1
0.0218333	-86.4627	2921	2730	200	C	3243	27	4242	38	999	47	2573	1656	158.5	2030	4	50	HOL (<6)	ODP1240	de la Fuente et al. (2015) - LCS updated dataset	2.1978		1	1	0
0.0218333	-86.4627	2921	3756.5	200	C	4136	27	5130	48	994	55	3485.5	1641	166	2030	4	50	HOL (<6)	ODP1240	de la Fuente et al. (2015) - LCS updated dataset	3.72687		1	1	0
0.0218333	-86.4627	2921	8261.5	200	C	8046	37	8885	47	839	60	7436.4	1439	221.25	2030	4	50	EHOL (7-11)	ODP1240	de la Fuente et al. (2015) - LCS updated dataset	4.59965		1	1	0
0.0218333	-86.4627	2921	9567	200	C	8937.5	62.2415	9677	57	739.5	84	8699.6	1033	180	2030	4	50	EHOL (7-11)	ODP1240	de la Fuente et al. (2015) - LCS updated dataset	8.10076		1	1	0
0.0218333	-86.4627	2921	10445.4	200	C	9388	63.6553	10095	62	707	89	9283	830	187.75	2030	4	50	EHOL (7-11)	ODP1240	de la Fuente et al. (2015) - LCS updated dataset	11.249		1	1	1
0.0218333	-86.4627	2921	12852	200	C	11215	55	12373	62	1158	83	10989	1413	247	2030	4	50		ODP1240	de la Fuente et al. (2015) - LCS updated dataset	10.7376		1	1	1
0.0218333	-86.4627	2921	13572	200	C	11964	55	12934	64	970	84	11670	1197	206	2030	4	50	BA (12.8-14.8)	ODP1240	de la Fuente et al. (2015) - LCS updated dataset	11.1995		1	1	1
0.0218333	-86.4627	2921	14494.2	200	C	12492	58	13801	67	1309	89	12419	1390	102.25	2030	4	50	BA (12.8-14.8)	ODP1240	de la Fuente et al. (2015) - LCS updated dataset	12.2117		1	1	1
0.0218333	-86.4627	2921	16451.5	200	C	14273	67	15260	70	987	97	13628	1631	149.25	2030	4	50	HS1 (15-17.5)	ODP1240	de la Fuente et al. (2015) - LCS updated dataset	12.4609		1	1	1
0.0218333	-86.4627	2921	16973.8	200	C	14794	77	15922	86	1128	115	13920	1973	173.25	2030	4	50	HS1 (15-17.5)	ODP1240	de la Fuente et al. (2015) - LCS updated dataset	13.0201		1	1	1
0.0218333	-86.4627	2921	18291	200	C	16713	91	18152	107	1439	140	15111	3099	227	2030	4	50		ODP1240	de la Fuente et al. (2015) - LCS updated dataset	14.2693		1	1	1
0.0218333	-86.4627	2921	19704.5	200	C	17546	88	19668	99	2122	132	16370	3316	193.5	2030	4	50	LGM (19-21.8)	ODP1240	de la Fuente et al. (2015) - LCS updated dataset	15.4279		1	1	1
0.0218333	-86.4627	2921	22245	200	C	19492	154	20946	178	1454	235	18276	2644	285.25	2030	4	50		ODP1240	de la Fuente et al. (2015) - LCS updated dataset	14.2953		1	1	1
0.0218333	-86.4627	2921	24483	200	C	20705	116	22753	159	2048	197	20356	2366	213.75	2030	4	50		ODP1240	de la Fuente et al. (2015) - LCS updated dataset	14.2139		1	1	1
0.0218333	-86.4627	2921	26214	200	C	23310	170	24238	212	928	272	21965	2230	320.25	2030	4	50	preLGM (25-30)	ODP1240	de la Fuente et al. (2015) - LCS updated dataset	13.8094		1	1	1
-36.22	-73.67	1000	10056.5	415	TS	9160	380	9970	60	810	385	8910.5	1058	264.25	1045	4	51	EHOL (7-11)	SO161-SL22	De Pol-Holz et al. (2010)	25.1579		1	1	1
-36.22	-73.67	1000	11591	98	TS	11050	55	11300	55	250	78	10010	1251	69	1045	4	51		SO161-SL22	De Pol-Holz et al. (2010)	27.6939		1	1	1
-36.22	-73.67	1000	12492	128	TS	11700	100	12300	80	600	128	10512	1834	135	1045	4	51	YD (11.8-12.7)	SO161-SL22	De Pol-Holz et al. (2010)	27.6177		1	1	1
-36.22	-73.67	1000	13853	115	TS	13050	100	13400	60	350	117	12017	1403	119.25	1045	4	51	BA (12.8-14.8)	SO161-SL22	De Pol-Holz et al. (2010)	30.6793		1	1	1
-36.22	-73.67	1000	14532	114	TS	13450	65	13700	60	250	88	12436	1269	74	1045	4	51	BA (12.8-14.8)	SO161-SL22	De Pol-Holz et al. (2010)	33.7875		1	1	1
-36.22	-73.67	1000	14967	103	TS	14050	90	14450	90	400	127	12560	1885	123	1045	4	51	HS1 (15-17.5)	SO161-SL22	De Pol-Holz et al. (2010)	36.0794		1	1	1
-36.22	-73.67	1000	15216.5	86	TS	14200	75	14650	90	450	117	12756	1889	118.75	1045	4	51	HS1 (15-17.5)	SO161-SL22	De Pol-Holz et al. (2010)	37.1307		1	1	1
-36.22	-73.67	1000	15710.5	81	TS	14650	65	15150	85	500	107	13104	2044	111.5	1045	4	51	HS1 (15-17.5)	SO161-SL22	De Pol-Holz et al. (2010)	37.4272		1	1	1
-36.22	-73.67	1000	15969	81	TS	14800	75	15050	75	250	106	13282	1760	97.75	1045	4	51	HS1 (15-17.5)	SO161-SL22	De Pol-Holz et al. (2010)	38.7626		1	1	1
-36.22	-73.67	1000	16360.5	80	TS	15100	75	15550	75	450	106	13572	1983	100	1045	4	51	HS1 (15-17.5)	SO161-SL22	De Pol-Holz et al. (2010)	40.6467		1	1	1
-36.22	-73.67	1000	16658.5	82	TS	15350	70	15850	100	500	122	13767	2088	115.5	1045	4	51	HS1 (15-17.5)	SO161-SL22	De Pol-Holz et al. (2010)	41.1201		1	1	1
-36.22	-73.67	1000	17084	82	TS	15700	80	16250	85	550	117	14088	2179	126	1045	4	51	HS1 (15-17.5)	SO161-SL22	De Pol-Holz et al. (2010)	42.4374		1	1	1
-36.22	-73.67	1000	17490	88	TS	16000	65	16550	75	550	99	14435	2132	113.5	1045	4	51	HS1 (15-17.5)	SO161-SL22	De Pol-Holz et al. (2010)	43.4534		1	1	1
-36.22	-73.67	1000	18159	75	TS	16100	75	16900	70	800	103	14761	2115	147	1045	4	51		SO161-SL22	De Pol-Holz et al. (2010)	43.2293		1	1	1
-36.22	-73.67	1000	18682	58	TS	16600	70	17100	75	500	103	15327	1779	127	1045	4	51		SO161-SL22	De Pol-Holz et al. (2010)	43.2502		1	1	1
-36.22	-73.67	1000	18859	55	TS	16850	75	17550	75	700	106	15587	1963	115.5	1045	4	51		SO161-SL22	De Pol-Holz et al. (2010)	43.3745		1	1	1
-36.22	-73.67	1000	18974	60	TS	16800	110	17550	90	750	142	15740	1817	111.75	1045	4	51	LGM (19-21.8)	SO161-SL22	De Pol-Holz et al. (2010)	43.9022		1	1	1
-36.22	-73.67	1000	19098	71	TS	16900	85	17750	85	850	120	15830	1910	110.25	1045	4	51	LGM (19-21.8)	SO161-SL22	De Pol-Holz et al. (2010)	44.1407		1	1	1
-36.22	-73.67	1000	19494	82	TS	17300	70	18000	100	700	122	16129	1859	146	1045	4	51	LGM (19-21.8)	SO161-SL22	De Pol-Holz et al. (2010)	45.296		1	1	1
41.73	142.55	978	10543	161	TS	10000	140	10850	140	850	198	9316	1510	189	1849	3	52	EHOL (7-11)	CH84-14	Duplessy et al. (1989)	21.8154		1	1	1
41.73	142.55	978	11050	144	TS	10230	140	11060	150	830	205	9542	1425	188.5	1849	3	52	EHOL (7-11)	CH84-14	Duplessy et al. (1989)	25.3394		1	1	1
41.73	142.55	978	11540.5	157	TS	10640	150	11370	130	730	198	10033	1334	151.5	1849	3	52		CH84-14	Duplessy et al. (1989)	26.8619		1	1	1
41.73	142.55	978	12052.5	180	TS	10870	150	11630	180	760	234	10330	1323	198.25	1849	3	52	YD (11.8-12.7)	CH84-14	Duplessy et al. (1989)	28.2099		1	1	1
41.73	142.55	978	13292.5	139	TS	12180	160	13200	150	1020	219	11380	1779	220	1849	3	52	BA (12.8-14.8)	CH84-14	Duplessy et al. (1989)	30.0922		1	1	1
41.73	142.55	978	13828	163	TS	12820	180	13010	170	190	248	12020	1048	222.5	1849	3	52	BA (12.8-14.8)	CH84-14	Duplessy et al. (1989)	31.0963		1	1	1
41.73	142.55	978	14245	171	TS	12750	150	13930	220	1180	266	12322	1627	246.75	1849	3	52	BA (12.8-14.8)	CH84-14	Duplessy et al. (1989)	33.696		1	1	1
41.73	142.55	978	14732	172	TS	13060	140	13500	200	440	244	12386	1038	210.5	1849	3	52	BA (12.8-14.8)	CH84-14	Duplessy et al. (1989)	34.6185		1	1	1
41.73	142.55	978	15599.5	179	TS	13830	150	14140	200	310	250	13012	1114	235	1849	3	52	HS1 (15-17.5)	CH84-14	Duplessy et al. (1989)	35.2575		1	1	1
41.73	142.55	978	17765	226	TS	15570	210	15940	190	370	283	14486	1405	244.5	1849	3	52		CH84-14	Duplessy et al. (1989)	38.8404		1	1	1
34	-63	2372	12660.7	50	C	NaN	NaN	11500	30	NaN	NaN	10587	892	97.25	731	1	53	YD (11.8-12.7)	ALV-3887-1549-004-007	Eltgroth et al. (2006)	NaN		1	1	1
34	-63	2372	12680.7	50	C	NaN	NaN	11370	35	NaN	NaN	10624	737	110	731	1	53	YD (11.8-12.7)	ALV-3887-1549-004-007	Eltgroth et al. (2006)	NaN		1	1	1
34	-63	2372	12700	50	C	NaN	NaN	11460	30	NaN	NaN	10656	797	107.25	731	1	53	YD (11.8-12.7)	ALV-3887-1549-004-007	Eltgroth et al. (2006)	NaN		1	1	1
34	-63	2372	12673	35	C	NaN	NaN	11470	35	NaN	NaN	10606	850	73.5	731	1	53	YD (11.8-12.7)	ALV-3887-1549-004-009	Eltgroth et al. (2006)	NaN		1	1	1
34	-63	2372	12686	35	C	NaN	NaN	11340	30	NaN	NaN	10636	703	79.75	731	1	53	YD (11.8-12.7)	ALV-3887-1549-004-009	Eltgroth et al. (2006)	NaN		1	1	1
34	-63	2372	12700	35	C	NaN	NaN	11420	40	NaN	NaN	10656	757	93	731	1	53	YD (11.8-12.7)	ALV-3887-1549-004-009	Eltgroth et al. (2006)	NaN		1	1	1
34	-63	2372	12540	55	C	NaN	NaN	11380	30	NaN	NaN	10513	874	67.5	731	1	53	YD (11.8-12.7)	ALV-3887-1549-004-012	Eltgroth et al. (2006)	NaN		1	1	1
34	-63	2372	12567.4	55	C	NaN	NaN	11410	35	NaN	NaN	10472	894	66	731	1	53	YD (11.8-12.7)	ALV-3887-1549-004-012	Eltgroth et al. (2006)	NaN		1	1	1
34	-63	2372	12590	55	C	NaN	NaN	11340	35	NaN	NaN	10494	810	67.25	731	1	53	YD (11.8-12.7)	ALV-3887-1549-004-012	Eltgroth et al. (2006)	NaN		1	1	1
38	-60.5	1778	12180.3	150	C	NaN	NaN	11010	30	NaN	NaN	10378	647	69.5	677	1	53	YD (11.8-12.7)	ALV-3890-1407-003-001	Eltgroth et al. (2006)	NaN		1	1	1
38	-60.5	1778	12195.7	150	C	NaN	NaN	10780	30	NaN	NaN	10392	414	69.25	677	1	53	YD (11.8-12.7)	ALV-3890-1407-003-001	Eltgroth et al. (2006)	NaN		1	1	1
38	-60.5	1778	12220	150	C	NaN	NaN	11030	30	NaN	NaN	10405	659	69.75	677	1	53	YD (11.8-12.7)	ALV-3890-1407-003-001	Eltgroth et al. (2006)	NaN		1	1	1
39	-61	1176	11285.1	60	C	NaN	NaN	10070	35	NaN	NaN	9935	154	89.75	666	1	53		ALV-3891-1459-003-002	Eltgroth et al. (2006)	NaN		1	1	1
39	-61	1176	11308.2	60	C	NaN	NaN	9940	30	NaN	NaN	9932.6	3	15.75	666	1	53		ALV-3891-1459-003-002	Eltgroth et al. (2006)	NaN		1	1	1
39	-61	1176	11330	60	C	NaN	NaN	10000	25	NaN	NaN	9956	48	31	666	1	53		ALV-3891-1459-003-002	Eltgroth et al. (2006)	NaN		1	1	1
39	-61	1222	11418.9	65	C	NaN	NaN	10060	35	NaN	NaN	10046	55	30.5	664	1	53		ALV-3891-1758-006-003	Eltgroth et al. (2006)	NaN		1	1	1
39	-61	1222	11430.7	65	C	NaN	NaN	9970	30	NaN	NaN	10028	41	-16.5	664	1	53		ALV-3891-1758-006-003	Eltgroth et al. (2006)	NaN	Negative radcal error, poor convergence	0	0	0
39	-61	1222	11450	65	C	NaN	NaN	10040	25	NaN	NaN	10011	22	15	664	1	53		ALV-3891-1758-006-003	Eltgroth et al. (2006)	NaN		1	1	1
37.9583	-25.55	1152	11918.1	60	C	NaN	NaN	10780	40	NaN	NaN	10207	544	62.75	660	1	53	YD (11.8-12.7)	Smithsonian 48735.1	Eltgroth et al. (2006)	NaN		1	1	1
37.9583	-25.55	1152	11929.7	60	C	NaN	NaN	10420	30	NaN	NaN	10215	175	56.25	660	1	53	YD (11.8-12.7)	Smithsonian 48735.1	Eltgroth et al. (2006)	NaN		1	1	1
37.9583	-25.55	1152	11935.8	60	C	NaN	NaN	10500	40	NaN	NaN	10234	249	62.25	660	1	53	YD (11.8-12.7)	Smithsonian 48735.1	Eltgroth et al. (2006)	NaN		1	1	1
37.9583	-25.55	1152	11942.9	60	C	NaN	NaN	10370	30	NaN	NaN	10262	113	55.75	660	1	53	YD (11.8-12.7)	Smithsonian 48735.1	Eltgroth et al. (2006)	NaN		1	1	1
37.9583	-25.55	1152	11948.8	60	C	NaN	NaN	10660	35	NaN	NaN	10278	398	58.5	660	1	53	YD (11.8-12.7)	Smithsonian 48735.1	Eltgroth et al. (2006)	NaN		1	1	1
37.9583	-25.55	1152	11953.6	60	C	NaN	NaN	10750	35	NaN	NaN	10282	484	58.25	660	1	53	YD (11.8-12.7)	Smithsonian 48735.1	Eltgroth et al. (2006)	NaN		1	1	1
37.9583	-25.55	1152	11960	60	C	NaN	NaN	10800	35	NaN	NaN	10277	528	58	660	1	53	YD (11.8-12.7)	Smithsonian 48735.1	Eltgroth et al. (2006)	NaN		1	1	1
62.817	-3.867	1179	11080	200	C	9998	57	10197	117	199	130	9623	534	193	563	1	54	EHOL (7-11)	JF-FI-19PC	Ezat et al. (2017)	9.11552		1	1	0
62.817	-3.867	1179	11820	200	C	NaN	NaN	10594	85	NaN	NaN	10167	421	136.5	563	1	54	YD (11.8-12.7)	JF-FI-19PC	Ezat et al. (2017)	8.95		1	1	0
62.817	-3.867	1179	12800	200	C	12293	62	12275	67	-18	91	10908	1367	240.75	563	1	54		JF-FI-19PC	Ezat et al. (2017)	11.4062	Negative B-P	0	0	0
62.817	-3.867	1179	13760	200	C	12676	58	12717	68	41	89	11864	815	202	563	1	54	BA (12.8-14.8)	JF-FI-19PC	Ezat et al. (2017)	12.4273		1	1	1
62.817	-3.867	1179	13940	200	C	12901	63	12612	118	-289	134	12020	557	207.5	563	1	54	BA (12.8-14.8)	JF-FI-19PC	Ezat et al. (2017)	12.5897	Negative B-P	0	0	0
62.817	-3.867	1179	14250	200	C	12921	100	13046	100	125	141	12323	725	136.75	563	1	54	BA (12.8-14.8)	JF-FI-19PC	Ezat et al. (2017)	12.8772		1	1	1
62.817	-3.867	1179	14310	200	C	13174	66	13341	99	167	119	12353	996	156.25	563	1	54	BA (12.8-14.8)	JF-FI-19PC	Ezat et al. (2017)	12.963		1	1	1
62.817	-3.867	1179	14560	200	C	13474	108	13496	77	22	133	12449	1071	105.25	563	1	54	BA (12.8-14.8)	JF-FI-19PC	Ezat et al. (2017)	13.1868		1	1	1
62.817	-3.867	1179	14860	200	C	NaN	NaN	13793	61	NaN	NaN	12494	1287	129.5	563	1	54		JF-FI-19PC	Ezat et al. (2017)	8.95		1	1	0
62.817	-3.867	1179	15430	200	C	NaN	NaN	14958.5	68	NaN	NaN	12910	2046.5	161.25	563	1	54	HS1 (15-17.5)	JF-FI-19PC	Ezat et al. (2017)	8.95		1	1	0
62.817	-3.867	1179	16460	200	C	14293	56	14901.5	64	608.5	85	13632	1267.5	146.25	563	1	54	HS1 (15-17.5)	JF-FI-19PC	Ezat et al. (2017)	12.819		1	1	1
62.817	-3.867	1179	16910	200	C	14561	57	15306	90	745	107	13873	1406	172.25	563	1	54	HS1 (15-17.5)	JF-FI-19PC	Ezat et al. (2017)	12.7144		1	1	1
62.817	-3.867	1179	17590	200	C	15225	64	15525	66	300	92	14465	1076	155	563	1	54	HS1 (15-17.5)	JF-FI-19PC	Ezat et al. (2017)	12.564		1	1	1
62.817	-3.867	1179	18160	200	C	15384	60	16305	147	921	159	14762	1467	258	563	1	54		JF-FI-19PC	Ezat et al. (2017)	12.4449		1	1	1
62.817	-3.867	1179	18730	200	C	15878	65	16155	77	277	101	15391	754	225.75	563	1	54		JF-FI-19PC	Ezat et al. (2017)	12.3332		1	1	1
62.817	-3.867	1179	19300	200	C	16323	82	16959	78	636	113	15985	969	195	563	1	54	LGM (19-21.8)	JF-FI-19PC	Ezat et al. (2017)	12.228		1	1	1
62.817	-3.867	1179	19870	200	C	17200	77	17551.5	78	351.5	110	16443	1090.5	174.75	563	1	54	LGM (19-21.8)	JF-FI-19PC	Ezat et al. (2017)	12.1288		1	1	1
62.817	-3.867	1179	20440	200	C	17904	87	18554	86	650	122	16893	1640	191	563	1	54	LGM (19-21.8)	JF-FI-19PC	Ezat et al. (2017)	12.0352		1	1	1
62.817	-3.867	1179	21010	200	C	18931	88	19607	171	676	192	17472	2172	236	563	1	54	LGM (19-21.8)	JF-FI-19PC	Ezat et al. (2017)	11.9467		1	1	1
62.817	-3.867	1179	26070	200	C	23610	143	23681	134	71	196	21954	1788	293.75	563	1	54	preLGM (25-30)	JF-FI-19PC	Ezat et al. (2017)	11.4308		1	1	1
62.817	-3.867	1179	26330	200	C	23484	108	24098	195	614	223	22042	1982	293	563	1	54	preLGM (25-30)	JF-FI-19PC	Ezat et al. (2017)	11.4128		1	1	1
62.817	-3.867	1179	26740	200	C	23962	170	24526	135	564	217	22366	2104	207	563	1	54	preLGM (25-30)	JF-FI-19PC	Ezat et al. (2017)	11.3874		1	1	1
62.9755	-17.5895	1237	14670	200	C	NaN	NaN	14100	75	NaN	NaN	12477	1652	108.5	548	1	55	BA (12.8-14.8)	RAPiD-10-1P	Ezat et al. (2017)	45.2751		1	1	1
62.9755	-17.5895	1237	14840	200	C	NaN	NaN	13100	70	NaN	NaN	12477	602	130.75	548	1	55		RAPiD-10-1P	Ezat et al. (2017)	45.2751		1	1	1
62.9755	-17.5895	1237	14874	200	C	NaN	NaN	14050	75	NaN	NaN	12502	1535	139.25	548	1	55		RAPiD-10-1P	Ezat et al. (2017)	45.2751		1	1	1
62.9755	-17.5895	1237	16848	200	C	NaN	NaN	16200	75	NaN	NaN	13843	2341	163.5	548	1	55	HS1 (15-17.5)	RAPiD-10-1P	Ezat et al. (2017)	45.2751		1	1	1
62.9755	-17.5895	1237	17242	200	C	NaN	NaN	15650	100	NaN	NaN	14148	1469	195.75	548	1	55	HS1 (15-17.5)	RAPiD-10-1P	Ezat et al. (2017)	45.2751		1	1	1
62.9755	-17.5895	1237	17807	200	C	NaN	NaN	15750	80	NaN	NaN	14522	1201	153	548	1	55		RAPiD-10-1P	Ezat et al. (2017)	45.2751		1	1	1
62.9755	-17.5895	1237	17944	200	C	NaN	NaN	16850	110	NaN	NaN	14653	2208	218.5	548	1	55		RAPiD-10-1P	Ezat et al. (2017)	45.2751		1	1	1
62.9755	-17.5895	1237	18081	200	C	NaN	NaN	15800	75	NaN	NaN	14715	1066	220.5	548	1	55		RAPiD-10-1P	Ezat et al. (2017)	45.2751		1	1	1
62.9755	-17.5895	1237	18372	200	C	NaN	NaN	15950	60	NaN	NaN	15238	808	206.5	548	1	55		RAPiD-10-1P	Ezat et al. (2017)	45.2751		1	1	1
62.9755	-17.5895	1237	18766	200	C	NaN	NaN	16700	70	NaN	NaN	15432	1249	226	548	1	55		RAPiD-10-1P	Ezat et al. (2017)	45.2751		1	1	1
-15.63	166.93	150	37724	68	S	NaN	NaN	34090	630	NaN	NaN	33314	788	626.75	571	4	56		AK-AA-1	Fairbanks et al. (2005)	NaN		1	1	1
-15.63	166.93	150	7518	17	S	NaN	NaN	6895	30	NaN	NaN	6664.8	254	44.5	571	4	56	EHOL (7-11)	AK-BC-2	Fairbanks et al. (2005)	NaN		1	1	1
-15.63	166.93	150	36091	67	S	NaN	NaN	32250	500	NaN	NaN	31646	588	515.25	571	4	56		AK-F-1	Fairbanks et al. (2005)	NaN		1	1	1
-15.63	166.93	150	33677	39	S	NaN	NaN	29730	230	NaN	NaN	29075	650	249.75	571	4	56		AK-L-1	Fairbanks et al. (2005)	NaN		1	1	1
-15.63	166.93	150	48183	102	S	NaN	NaN	46060	630	NaN	NaN	45887	149	728	571	4	56		ARA04-43E	Fairbanks et al. (2005)	NaN		1	1	1
1.99	-157.78	150	11859	26	S	NaN	NaN	10540	30	NaN	NaN	10199	337	41.5	587	3	56	YD (11.8-12.7)	CHR 4-1-7	Fairbanks et al. (2005)	NaN		1	1	1
1.99	-157.78	150	12461	23	S	NaN	NaN	10730	30	NaN	NaN	10398	321	63.75	587	3	56	YD (11.8-12.7)	CHR 4-2-4	Fairbanks et al. (2005)	NaN		1	1	1
1.99	-157.78	150	12716	28	S	NaN	NaN	11280	30	NaN	NaN	10686	584	85.25	587	3	56	YD (11.8-12.7)	CHR 4-2-7	Fairbanks et al. (2005)	NaN		1	1	1
1.99	-157.78	150	12836	25	S	NaN	NaN	11290	30	NaN	NaN	10950	343	46	587	3	56	BA (12.8-14.8)	CHR 4-2-9	Fairbanks et al. (2005)	NaN		1	1	1
1.99	-157.78	150	13650	45	S	NaN	NaN	11930	30	NaN	NaN	11814	110	59.5	587	3	56	BA (12.8-14.8)	CHR 4-3-15	Fairbanks et al. (2005)	NaN		1	1	1
1.99	-157.78	150	12961	30	S	NaN	NaN	11440	30	NaN	NaN	11039	396	37.75	587	3	56	BA (12.8-14.8)	CHR 4-3-1A	Fairbanks et al. (2005)	NaN		1	1	1
1.99	-157.78	150	12959	21	S	NaN	NaN	11420	30	NaN	NaN	11038	376	36	587	3	56	BA (12.8-14.8)	CHR 4-3-2	Fairbanks et al. (2005)	NaN		1	1	1
1.99	-157.78	150	12990	28	S	NaN	NaN	11410	30	NaN	NaN	11048	357	36.5	587	3	56	BA (12.8-14.8)	CHR 4-3-3	Fairbanks et al. (2005)	NaN		1	1	1
1.99	-157.78	150	13117	29	S	NaN	NaN	11660	30	NaN	NaN	11230	441	71	587	3	56	BA (12.8-14.8)	CHR 4-3-8	Fairbanks et al. (2005)	NaN		1	1	1
1.99	-157.78	150	11925	12	S	NaN	NaN	10560	30	NaN	NaN	10207	339	39.75	587	3	56	YD (11.8-12.7)	CHR 5-1-11A	Fairbanks et al. (2005)	NaN		1	1	1
1.99	-157.78	150	11527	25	S	NaN	NaN	10260	30	NaN	NaN	10042	222	38.25	587	3	56		CHR 5-1-3	Fairbanks et al. (2005)	NaN		1	1	1
1.99	-157.78	150	11548	21	S	NaN	NaN	10360	30	NaN	NaN	10033	326	37.5	587	3	56		CHR 5-1-5	Fairbanks et al. (2005)	NaN		1	1	1
1.99	-157.78	150	11805	38	S	NaN	NaN	10480	30	NaN	NaN	10124	326	49.5	587	3	56	YD (11.8-12.7)	CHR 5-1-8	Fairbanks et al. (2005)	NaN		1	1	1
1.99	-157.78	150	11949	21	S	NaN	NaN	10550	30	NaN	NaN	10279	286	44.75	587	3	56	YD (11.8-12.7)	CHR 5-1-9	Fairbanks et al. (2005)	NaN		1	1	1
1.99	-157.78	150	11591	15	S	NaN	NaN	10310	40	NaN	NaN	10010	287	47	587	3	56		CHR 5-2-2	Fairbanks et al. (2005)	NaN		1	1	1
1.99	-157.78	150	11931	18	S	NaN	NaN	10500	30	NaN	NaN	10218	265	43.75	587	3	56	YD (11.8-12.7)	CHR 5-2-3	Fairbanks et al. (2005)	NaN		1	1	1
1.99	-157.78	150	11996	26	S	NaN	NaN	10580	40	NaN	NaN	10296	278	46.25	587	3	56	YD (11.8-12.7)	CHR 5-2-4	Fairbanks et al. (2005)	NaN		1	1	1
1.99	-157.78	150	11571	24	S	NaN	NaN	10390	30	NaN	NaN	10027	362	38.25	587	3	56		CHR 6-1-2	Fairbanks et al. (2005)	NaN		1	1	1
1.99	-157.78	150	11697	25	S	NaN	NaN	10390	40	NaN	NaN	10081	309	48.25	587	3	56		CHR 6-1-2	Fairbanks et al. (2005)	NaN		1	1	1
1.99	-157.78	150	11569	28	S	NaN	NaN	10360	30	NaN	NaN	10027	330	38.75	587	3	56		CHR 6-1-3	Fairbanks et al. (2005)	NaN		1	1	1
1.99	-157.78	150	12611	38	S	NaN	NaN	10900	30	NaN	NaN	10534	356	58.25	587	3	56	YD (11.8-12.7)	CHR 6-2-10	Fairbanks et al. (2005)	NaN		1	1	1
1.99	-157.78	150	12172	30	S	NaN	NaN	10710	30	NaN	NaN	10368	337	39	587	3	56	YD (11.8-12.7)	CHR 6-2-5	Fairbanks et al. (2005)	NaN		1	1	1
1.99	-157.78	150	12287	29	S	NaN	NaN	10770	30	NaN	NaN	10420	377	40	587	3	56	YD (11.8-12.7)	CHR 6-2-6	Fairbanks et al. (2005)	NaN		1	1	1
1.99	-157.78	150	12526	40	S	NaN	NaN	10730	30	NaN	NaN	10551	222	59.5	587	3	56	YD (11.8-12.7)	CHR 6-2-7	Fairbanks et al. (2005)	NaN		1	1	1
1.99	-157.78	150	12553	47	S	NaN	NaN	10850	30	NaN	NaN	10475	341	57.75	587	3	56	YD (11.8-12.7)	CHR 6-2-8	Fairbanks et al. (2005)	NaN		1	1	1
1.99	-157.78	150	10612	17	S	NaN	NaN	9730	30	NaN	NaN	9427	319	39.75	587	3	56	EHOL (7-11)	CHR 7-1-2	Fairbanks et al. (2005)	NaN		1	1	1
1.99	-157.78	150	10615	26	S	NaN	NaN	9800	30	NaN	NaN	9424	394	43.25	587	3	56	EHOL (7-11)	CHR 7-1-4	Fairbanks et al. (2005)	NaN		1	1	1
1.99	-157.78	150	10642	19	S	NaN	NaN	9700	30	NaN	NaN	9384.2	293	40.25	587	3	56	EHOL (7-11)	CHR 7-1-5	Fairbanks et al. (2005)	NaN		1	1	1
1.99	-157.78	150	11625	23	S	NaN	NaN	10440	30	NaN	NaN	10065	383	43	587	3	56		CHR 7-1-7	Fairbanks et al. (2005)	NaN		1	1	1
1.99	-157.78	150	12081	42	S	NaN	NaN	10590	30	NaN	NaN	10340	249	39	587	3	56	YD (11.8-12.7)	CHR 7-2-2	Fairbanks et al. (2005)	NaN		1	1	1
1.99	-157.78	150	12199	41	S	NaN	NaN	10620	30	NaN	NaN	10402	238	39.75	587	3	56	YD (11.8-12.7)	CHR 7-2-6	Fairbanks et al. (2005)	NaN		1	1	1
1.99	-157.78	150	12223	25	S	NaN	NaN	10750	30	NaN	NaN	10399	360	38.75	587	3	56	YD (11.8-12.7)	CHR 7-2-8	Fairbanks et al. (2005)	NaN		1	1	1
1.99	-157.78	150	11730	19	S	NaN	NaN	10340	30	NaN	NaN	10091	240	40.75	587	3	56		CHR 7-3-2	Fairbanks et al. (2005)	NaN		1	1	1
1.99	-157.78	150	12433	27	S	NaN	NaN	10820	30	NaN	NaN	10368	448	51	587	3	56	YD (11.8-12.7)	CHR 7-4-3	Fairbanks et al. (2005)	NaN		1	1	1
1.99	-157.78	150	12785	30	S	NaN	NaN	11300	30	NaN	NaN	10913	398	66.5	587	3	56	BA (12.8-14.8)	CHR 7-4-5	Fairbanks et al. (2005)	NaN		1	1	1
1.99	-157.78	150	12838	47	S	NaN	NaN	11300	30	NaN	NaN	10957	352	60.75	587	3	56	BA (12.8-14.8)	CHR 7-5-2A	Fairbanks et al. (2005)	NaN		1	1	1
1.99	-157.78	150	12995	28	S	NaN	NaN	11500	30	NaN	NaN	11052	446	36.5	587	3	56	BA (12.8-14.8)	CHR 7-6-1	Fairbanks et al. (2005)	NaN		1	1	1
1.99	-157.78	150	12942	48	S	NaN	NaN	11420	30	NaN	NaN	11044	387	46.5	587	3	56	BA (12.8-14.8)	CHR 7-6-3.1	Fairbanks et al. (2005)	NaN		1	1	1
1.99	-157.78	150	13709	24	S	NaN	NaN	12080	30	NaN	NaN	11820	254	41.25	587	3	56	BA (12.8-14.8)	CHR 7-7-1.1	Fairbanks et al. (2005)	NaN		1	1	1
1.99	-157.78	150	13397	33	S	NaN	NaN	11800	30	NaN	NaN	11512	275	46	587	3	56	BA (12.8-14.8)	CHR 7-7-2A.1	Fairbanks et al. (2005)	NaN		1	1	1
1.99	-157.78	150	13365	21	S	NaN	NaN	11770	30	NaN	NaN	11522	258	42.75	587	3	56	BA (12.8-14.8)	CHR 7-7-3A.1	Fairbanks et al. (2005)	NaN		1	1	1
13.04	-59.56	150	12816	37	S	NaN	NaN	11265	25	NaN	NaN	10907	339	54.75	331	1	56	BA (12.8-14.8)	RGF-12-14-2	Fairbanks et al. (2005)	NaN		1	1	1
13.04	-59.56	150	19345	53	S	NaN	NaN	16165	40	NaN	NaN	16000	159	59.5	331	1	56	LGM (19-21.8)	RGF-15-10-1	Fairbanks et al. (2005)	NaN		1	1	1
13.04	-59.55	150	19438	25	S	NaN	NaN	16155	40	NaN	NaN	16066	87	58	331	1	56	LGM (19-21.8)	RGF-15-10-1	Fairbanks et al. (2005)	NaN		1	1	1
13.04	-59.55	150	19450	36	S	NaN	NaN	16470	35	NaN	NaN	16078	389	62.25	331	1	56	LGM (19-21.8)	RGF-15-10-2	Fairbanks et al. (2005)	NaN		1	1	1
13.04	-59.55	150	19203	37	S	NaN	NaN	16170	40	NaN	NaN	15946	227	60.5	331	1	56	LGM (19-21.8)	RGF-15-10-3	Fairbanks et al. (2005)	NaN		1	1	1
13.04	-59.55	150	19581	26	S	NaN	NaN	16475	45	NaN	NaN	16274	200	80.25	331	1	56	LGM (19-21.8)	RGF-15-12-2	Fairbanks et al. (2005)	NaN		1	1	1
13.04	-59.55	150	19337	23	S	NaN	NaN	16465	40	NaN	NaN	15996	466	53.5	331	1	56	LGM (19-21.8)	RGF-15-12-4	Fairbanks et al. (2005)	NaN		1	1	1
13.04	-59.56	150	19684	39	S	NaN	NaN	16745	45	NaN	NaN	16381	375	65.5	331	1	56	LGM (19-21.8)	RGF-15-13-4	Fairbanks et al. (2005)	NaN		1	1	1
13.04	-59.55	150	19434	30	S	NaN	NaN	16855	40	NaN	NaN	16062	790	60	331	1	56	LGM (19-21.8)	RGF-15-13-6	Fairbanks et al. (2005)	NaN		1	1	1
13.04	-59.55	150	19483	27	S	NaN	NaN	16975	45	NaN	NaN	16115	858	66.5	331	1	56	LGM (19-21.8)	RGF-15-14-3	Fairbanks et al. (2005)	NaN		1	1	1
13.04	-59.55	150	19638	25	S	NaN	NaN	16980	35	NaN	NaN	16368	618	64.25	331	1	56	LGM (19-21.8)	RGF-15-14-4	Fairbanks et al. (2005)	NaN		1	1	1
13.04	-59.55	150	19443	30	S	NaN	NaN	16985	35	NaN	NaN	16071	911	57.75	331	1	56	LGM (19-21.8)	RGF-15-14-5	Fairbanks et al. (2005)	NaN		1	1	1
13.04	-59.55	150	19595	44	S	NaN	NaN	17025	40	NaN	NaN	16302	726	89	331	1	56	LGM (19-21.8)	RGF-15-15-3	Fairbanks et al. (2005)	NaN		1	1	1
13.04	-59.55	150	19627	34	S	NaN	NaN	17150	45	NaN	NaN	16355	804	77.25	331	1	56	LGM (19-21.8)	RGF-15-15-5	Fairbanks et al. (2005)	NaN		1	1	1
13.04	-59.55	150	19913	34	S	NaN	NaN	17220	40	NaN	NaN	16506	718	69.25	331	1	56	LGM (19-21.8)	RGF-15-15-8	Fairbanks et al. (2005)	NaN		1	1	1
13.04	-59.55	150	20082	27	S	NaN	NaN	17175	40	NaN	NaN	16610	563	61.75	331	1	56	LGM (19-21.8)	RGF-15-15-9	Fairbanks et al. (2005)	NaN		1	1	1
13.04	-59.55	150	20575	31	S	NaN	NaN	17825	55	NaN	NaN	17083	745	76.5	331	1	56	LGM (19-21.8)	RGF-15-17-3	Fairbanks et al. (2005)	NaN		1	1	1
13.04	-59.55	150	20504	39	S	NaN	NaN	17980	60	NaN	NaN	16982	996	90.5	331	1	56	LGM (19-21.8)	RGF-15-19-2	Fairbanks et al. (2005)	NaN		1	1	1
13.04	-59.55	150	12533	26	S	NaN	NaN	10885	25	NaN	NaN	10535	366	44.25	331	1	56	YD (11.8-12.7)	RGF-15-2-4	Fairbanks et al. (2005)	NaN		1	1	1
13.04	-59.55	150	12844	29	S	NaN	NaN	11045	25	NaN	NaN	10976	89	43.5	331	1	56	BA (12.8-14.8)	RGF-15-4-1	Fairbanks et al. (2005)	NaN		1	1	1
13.04	-59.55	150	14685	22	S	NaN	NaN	12880	30	NaN	NaN	12465	418	54.75	331	1	56	BA (12.8-14.8)	RGF-15-7-1	Fairbanks et al. (2005)	NaN		1	1	1
13.04	-59.55	150	18494	36	S	NaN	NaN	15290	35	NaN	NaN	15153	133	67.75	331	1	56		RGF-15-8-1	Fairbanks et al. (2005)	NaN		1	1	1
13.05	-59.55	150	11512	17	S	NaN	NaN	10335	30	NaN	NaN	10059	293	38.75	331	1	56		RGF-16-12-6	Fairbanks et al. (2005)	NaN		1	1	1
13.04	-59.56	150	12179	33	S	NaN	NaN	10610	40	NaN	NaN	10377	234	47.25	331	1	56	YD (11.8-12.7)	RGF-9-1-2	Fairbanks et al. (2005)	NaN		1	1	1
13.04	-59.56	150	12029	30	S	NaN	NaN	10600	30	NaN	NaN	10313	281	37.25	331	1	56	YD (11.8-12.7)	RGF-9-1-6	Fairbanks et al. (2005)	NaN		1	1	1
13.04	-59.56	150	11756	53	S	NaN	NaN	10590	30	NaN	NaN	10133	470	53	331	1	56	YD (11.8-12.7)	RGF-9-1-7	Fairbanks et al. (2005)	NaN		1	1	1
13.04	-59.56	150	12186	42	S	NaN	NaN	10760	35	NaN	NaN	10374	382	43.5	331	1	56	YD (11.8-12.7)	RGF-9-1-8	Fairbanks et al. (2005)	NaN		1	1	1
13.04	-59.56	150	12239	87	S	NaN	NaN	10580	30	NaN	NaN	10365	199	42.25	331	1	56	YD (11.8-12.7)	RGF-9-1-8	Fairbanks et al. (2005)	NaN		1	1	1
13.04	-59.56	150	12015	24	S	NaN	NaN	10715	30	NaN	NaN	10318	402	36.5	331	1	56	YD (11.8-12.7)	RGF-9-2-3	Fairbanks et al. (2005)	NaN		1	1	1
13.04	-59.56	150	12017	32	S	NaN	NaN	10690	30	NaN	NaN	10317	377	38.5	331	1	56	YD (11.8-12.7)	RGF-9-2-3	Fairbanks et al. (2005)	NaN		1	1	1
13.04	-59.56	150	12091	28	S	NaN	NaN	10905	35	NaN	NaN	10329	559	41.25	331	1	56	YD (11.8-12.7)	RGF-9-2-5	Fairbanks et al. (2005)	NaN		1	1	1
13.04	-59.56	150	12103	39	S	NaN	NaN	10850	35	NaN	NaN	10361	500	42	331	1	56	YD (11.8-12.7)	RGF-9-2-5	Fairbanks et al. (2005)	NaN		1	1	1
13.04	-59.56	150	12327	45	S	NaN	NaN	10770	30	NaN	NaN	10388	384	41	331	1	56	YD (11.8-12.7)	RGF-9-2-7	Fairbanks et al. (2005)	NaN		1	1	1
13.04	-59.56	150	12290	28	S	NaN	NaN	10770	30	NaN	NaN	10417	376	40	331	1	56	YD (11.8-12.7)	RGF-9-2-7 rep	Fairbanks et al. (2005)	NaN		1	1	1
13.04	-59.56	150	18116	37	S	NaN	NaN	15320	30	NaN	NaN	14727	587	56.25	331	1	56		RGF-9-20-2	Fairbanks et al. (2005)	NaN		1	1	1
13.04	-59.56	150	18218	44	S	NaN	NaN	15400	35	NaN	NaN	14881	514	122.75	331	1	56		RGF-9-21-10	Fairbanks et al. (2005)	NaN		1	1	1
13.04	-59.56	150	18176	56	S	NaN	NaN	15405	30	NaN	NaN	14786	610	114	331	1	56		RGF-9-21-11	Fairbanks et al. (2005)	NaN		1	1	1
13.04	-59.56	150	19075	55	S	NaN	NaN	16335	45	NaN	NaN	15810	519	74.25	331	1	56	LGM (19-21.8)	RGF-9-27-5-rep	Fairbanks et al. (2005)	NaN		1	1	1
13.04	-59.56	150	12303	14	S	NaN	NaN	10785	25	NaN	NaN	10384	395	37.25	331	1	56	YD (11.8-12.7)	RGF-9-3-2	Fairbanks et al. (2005)	NaN		1	1	1
13.04	-59.56	150	12680	75	S	NaN	NaN	11030	35	NaN	NaN	10622	396	128.75	331	1	56	YD (11.8-12.7)	RGF-9-3-4	Fairbanks et al. (2005)	NaN		1	1	1
13.04	-59.56	150	21858	41	S	NaN	NaN	18590	40	NaN	NaN	17921	669	65.25	331	1	56		RGF-9-34-10	Fairbanks et al. (2005)	NaN		1	1	1
13.04	-59.56	150	21714	41	S	NaN	NaN	18550	40	NaN	NaN	17813	730	63.25	331	1	56	LGM (19-21.8)	RGF-9-34-7	Fairbanks et al. (2005)	NaN		1	1	1
13.04	-59.56	150	21802	41	S	NaN	NaN	18585	40	NaN	NaN	17879	705	65.25	331	1	56	LGM (19-21.8)	RGF-9-34-8	Fairbanks et al. (2005)	NaN		1	1	1
13.04	-59.56	150	21922	41	S	NaN	NaN	18670	40	NaN	NaN	17964	703	68	331	1	56		RGF-9-35-2	Fairbanks et al. (2005)	NaN		1	1	1
13.04	-59.56	150	22010	36	S	NaN	NaN	18670	40	NaN	NaN	18045	621	72	331	1	56		RGF-9-35-2 rep	Fairbanks et al. (2005)	NaN		1	1	1
13.04	-59.56	150	22160	62	S	NaN	NaN	18750	40	NaN	NaN	18206	544	81	331	1	56		RGF-9-35-6	Fairbanks et al. (2005)	NaN		1	1	1
13.04	-59.56	150	22574	48	S	NaN	NaN	19360	40	NaN	NaN	18736	629	78.5	331	1	56		RGF-9-37-3	Fairbanks et al. (2005)	NaN		1	1	1
13.04	-59.56	150	23044	37	S	NaN	NaN	19820	40	NaN	NaN	19191	631	90.5	331	1	56		RGF-9-38-1	Fairbanks et al. (2005)	NaN		1	1	1
13.04	-59.56	150	23296	61	S	NaN	NaN	19720	40	NaN	NaN	19382	332	80	331	1	56		RGF-9-38-2	Fairbanks et al. (2005)	NaN		1	1	1
13.04	-59.56	150	23039	38	S	NaN	NaN	19750	40	NaN	NaN	19183	568	94	331	1	56		RGF-9-38-3	Fairbanks et al. (2005)	NaN		1	1	1
13.04	-59.56	150	23867	44	S	NaN	NaN	20310	50	NaN	NaN	19915	399	105.5	331	1	56		RGF-9-39-2	Fairbanks et al. (2005)	NaN		1	1	1
13.04	-59.56	150	23858	69	S	NaN	NaN	20260	40	NaN	NaN	19899	364	142.5	331	1	56		RGF-9-39-3	Fairbanks et al. (2005)	NaN		1	1	1
13.04	-59.56	150	24883	55	S	NaN	NaN	21080	40	NaN	NaN	20602	468	67.5	331	1	56		RGF-9-39-4	Fairbanks et al. (2005)	NaN		1	1	1
13.04	-59.56	150	24579	41	S	NaN	NaN	20930	50	NaN	NaN	20425	501	83	331	1	56		RGF-9-39-5	Fairbanks et al. (2005)	NaN		1	1	1
13.04	-59.56	150	25866	53	S	NaN	NaN	21790	50	NaN	NaN	21537	250	136	331	1	56	preLGM (25-30)	RGF-9-41-10	Fairbanks et al. (2005)	NaN		1	1	1
13.04	-59.56	150	25645	40	S	NaN	NaN	21670	50	NaN	NaN	21212	453	89	331	1	56	preLGM (25-30)	RGF-9-41-3	Fairbanks et al. (2005)	NaN		1	1	1
13.04	-59.56	150	25741	53	S	NaN	NaN	21760	50	NaN	NaN	21358	403	104.5	331	1	56	preLGM (25-30)	RGF-9-41-9	Fairbanks et al. (2005)	NaN		1	1	1
13.04	-59.56	150	14100	27	S	NaN	NaN	12615	40	NaN	NaN	12228	393	58.25	331	1	56	BA (12.8-14.8)	RGF-9-8-2	Fairbanks et al. (2005)	NaN		1	1	1
13.04	-59.55	150	17935	26	S	NaN	NaN	15090	45	NaN	NaN	14646	443	64	331	1	56		RGF15-10-5	Fairbanks et al. (2005)	NaN		1	1	1
13.04	-59.56	150	22536	46	S	NaN	NaN	19450	60	NaN	NaN	18702	752	96.25	331	1	56		RGF9-37-2	Fairbanks et al. (2005)	NaN		1	1	1
13.04	-59.56	150	25639	45	S	NaN	NaN	21680	50	NaN	NaN	21203	471	91.5	331	1	56	preLGM (25-30)	RGF9-41-8	Fairbanks et al. (2005)	NaN		1	1	1
-15.6	166.8	150	1249	10	S	NaN	NaN	1885	30	NaN	NaN	1283	612	33.5	571	4	56	HOL (<6)	S-C-4*	Fairbanks et al. (2005)	NaN		1	1	1
-15.6	166.8	150	3352	17	S	NaN	NaN	3490	35	NaN	NaN	3104	381	48	571	4	56	HOL (<6)	S-T-2*	Fairbanks et al. (2005)	NaN		1	1	1
-15.6	166.8	150	4521	29	S	NaN	NaN	4315	30	NaN	NaN	4040	269	48.25	571	4	56	HOL (<6)	S-W-2*	Fairbanks et al. (2005)	NaN		1	1	1
-15.6	166.8	150	5182	21	S	NaN	NaN	4775	35	NaN	NaN	4492.2	284	41.25	571	4	56	HOL (<6)	S-X-1*	Fairbanks et al. (2005)	NaN		1	1	1
-36.221	-73.675	1001	9354	131	NA	NaN	NaN	9340	20	NaN	NaN	8330.4	1017	98.5	1045	4	57	EHOL (7-11)	22SL	Fontaine et al. (2019) PP	78.4314		1	1	1
-36.221	-73.675	1001	9558	137	NA	NaN	NaN	9775	20	NaN	NaN	8689.2	1118	76.75	1045	4	57	EHOL (7-11)	22SL	Fontaine et al. (2019) PP	58.8235		1	1	1
-36.221	-73.675	1001	9830	156	NA	NaN	NaN	9990	20	NaN	NaN	8813	1186	84.25	1045	4	57	EHOL (7-11)	22SL	Fontaine et al. (2019) PP	56.1403		1	1	1
-36.221	-73.675	1001	10115	153	NA	NaN	NaN	10360	20	NaN	NaN	8875	1445	80.25	1045	4	57	EHOL (7-11)	22SL	Fontaine et al. (2019) PP	47.7454		1	1	1
-36.221	-73.675	1001	10492	170	NA	NaN	NaN	10600	20	NaN	NaN	9263	1310	10.25	1045	4	57	EHOL (7-11)	22SL	Fontaine et al. (2019) PP	49.3827		1	1	1
-36.221	-73.675	1001	10978	165	NA	NaN	NaN	10845	30	NaN	NaN	9533.4	1248	110	1045	4	57	EHOL (7-11)	22SL	Fontaine et al. (2019) PP	50.4202		1	1	1
-36.221	-73.675	1001	11335	172	NA	NaN	NaN	11480	20	NaN	NaN	9957	1524	134	1045	4	57		22SL	Fontaine et al. (2019) PP	49.7738		1	1	1
-36.221	-73.675	1001	11556	172	NA	NaN	NaN	11300	55	NaN	NaN	10027	1258	110.25	1045	4	57		22SL	Fontaine et al. (2019) PP	51.5098		1	1	1
-36.221	-73.675	1001	12119	192	NA	NaN	NaN	12240	210	NaN	NaN	10362	1907	223.75	1045	4	57	YD (11.8-12.7)	22SL	Fontaine et al. (2019) PP	55.0459		1	1	1
-36.221	-73.675	1001	12228	200	NA	NaN	NaN	12185	45	NaN	NaN	10388	1815	108.25	1045	4	57	YD (11.8-12.7)	22SL	Fontaine et al. (2019) PP	55.1724		1	1	1
-36.221	-73.675	1001	12373	205	NA	NaN	NaN	12245	25	NaN	NaN	10371	1845	116.25	1045	4	57	YD (11.8-12.7)	22SL	Fontaine et al. (2019) PP	54.3478		1	1	1
-36.221	-73.675	1001	12557	211	NA	NaN	NaN	12400	45	NaN	NaN	10473	1878	121.75	1045	4	57	YD (11.8-12.7)	22SL	Fontaine et al. (2019) PP	53.9112		1	1	1
-36.221	-73.675	1001	13503	190	NA	NaN	NaN	13400	60	NaN	NaN	11666	1745	205.5	1045	4	57	BA (12.8-14.8)	22SL	Fontaine et al. (2019) PP	75.4286		1	1	1
-36.221	-73.675	1001	14378	192	NA	NaN	NaN	13700	60	NaN	NaN	12397	1322	116.5	1045	4	57	BA (12.8-14.8)	22SL	Fontaine et al. (2019) PP	69.4051		1	1	1
-36.221	-73.675	1001	15084	147	NA	NaN	NaN	14450	90	NaN	NaN	12645	1794	147.25	1045	4	57	HS1 (15-17.5)	22SL	Fontaine et al. (2019) PP	71.4286		1	1	1
-36.221	-73.675	1001	15434	135	NA	NaN	NaN	14650	90	NaN	NaN	12911	1736	130.75	1045	4	57	HS1 (15-17.5)	22SL	Fontaine et al. (2019) PP	65.7143		1	1	1
-36.221	-73.675	1001	15784	126	NA	NaN	NaN	15150	85	NaN	NaN	13165	1987	129	1045	4	57	HS1 (15-17.5)	22SL	Fontaine et al. (2019) PP	78.8804		1	1	1
-36.221	-73.675	1001	16177	118	NA	NaN	NaN	15050	75	NaN	NaN	13421	1621	115	1045	4	57	HS1 (15-17.5)	22SL	Fontaine et al. (2019) PP	79.4473		1	1	1
-36.221	-73.675	1001	16756	127	NA	NaN	NaN	15550	100	NaN	NaN	13813	1740	125.75	1045	4	57	HS1 (15-17.5)	22SL	Fontaine et al. (2019) PP	72.7273		1	1	1
-36.221	-73.675	1001	17031	123	NA	NaN	NaN	15850	75	NaN	NaN	13990	1847	134.75	1045	4	57	HS1 (15-17.5)	22SL	Fontaine et al. (2019) PP	69.0846		1	1	1
-36.221	-73.675	1001	17610	121	NA	NaN	NaN	16250	85	NaN	NaN	14464	1792	110.5	1045	4	57	HS1 (15-17.5)	22SL	Fontaine et al. (2019) PP	80.6452		1	1	1
-36.221	-73.675	1001	18044	126	NA	NaN	NaN	16550	75	NaN	NaN	14702	1845	162.25	1045	4	57		22SL	Fontaine et al. (2019) PP	64.5995		1	1	1
-36.221	-73.675	1001	18431	125	NA	NaN	NaN	16900	70	NaN	NaN	15232	1723	144.25	1045	4	57		22SL	Fontaine et al. (2019) PP	58.0808		1	1	1
-36.221	-73.675	1001	18827	113	NA	NaN	NaN	17100	90	NaN	NaN	15531	1563	182.5	1045	4	57		22SL	Fontaine et al. (2019) PP	60.241		1	1	1
-36.221	-73.675	1001	18993	109	NA	NaN	NaN	17550	75	NaN	NaN	15755	1801	143	1045	4	57	LGM (19-21.8)	22SL	Fontaine et al. (2019) PP	72.4638		1	1	1
-36.221	-73.675	1001	19200	115	NA	NaN	NaN	17550	90	NaN	NaN	15944	1624	126.75	1045	4	57	LGM (19-21.8)	22SL	Fontaine et al. (2019) PP	76.9231		1	1	1
-36.221	-73.675	1001	19330	117	NA	NaN	NaN	17750	85	NaN	NaN	15994	1744	127.5	1045	4	57	LGM (19-21.8)	22SL	Fontaine et al. (2019) PP	80.1282		1	1	1
-36.221	-73.675	1001	19642	129	NA	NaN	NaN	17250	330	NaN	NaN	16372	948	345.5	1045	4	57	LGM (19-21.8)	22SL	Fontaine et al. (2019) PP	92.5926		1	1	1
-36.221	-73.675	1001	19804	135	NA	NaN	NaN	18000	100	NaN	NaN	16361	1590	145.25	1045	4	57	LGM (19-21.8)	22SL	Fontaine et al. (2019) PP	92.5926		1	1	1
-31.4857	-72	3086	1151	134	NA	NaN	NaN	2945	35	NaN	NaN	1221	1719	10.25	1748	4	58	HOL (<6)	GeoB 7149-2	Fontaine et al. (2019) PP	24.7525		1	1	1
-31.4857	-72	3086	1353	150	NA	NaN	NaN	3530	80	NaN	NaN	1479	2056	175.5	1748	4	58	HOL (<6)	GeoB 7149-2	Fontaine et al. (2019) PP	16.8634		1	1	1
-31.4857	-72	3086	3132	152	NA	NaN	NaN	4750	60	NaN	NaN	2938	1784	130.25	1748	4	58	HOL (<6)	GeoB 7149-2	Fontaine et al. (2019) PP	18.0505		1	1	1
-31.4857	-72	3086	3686	136	NA	NaN	NaN	5435	30	NaN	NaN	3414	1996	113.75	1748	4	58	HOL (<6)	GeoB 7149-2	Fontaine et al. (2019) PP	27.7778		1	1	1
-31.4857	-72	3086	3866	117	NA	NaN	NaN	5180	90	NaN	NaN	3567	1609	126.5	1748	4	58	HOL (<6)	GeoB 7149-2	Fontaine et al. (2019) PP	17.7148		1	1	1
-31.4857	-72	3086	4995	188	NA	NaN	NaN	6330	190	NaN	NaN	4440	1929	234.25	1748	4	58	HOL (<6)	GeoB 7149-2	Fontaine et al. (2019) PP	21.692		1	1	1
-31.4857	-72	3086	5917	267	NA	NaN	NaN	7190	25	NaN	NaN	5158.4	2018	48.5	1748	4	58	HOL (<6)	GeoB 7149-2	Fontaine et al. (2019) PP	21.692		1	1	1
-31.4857	-72	3086	5917	267	NA	NaN	NaN	7810	70	NaN	NaN	5158.4	2642	261	1748	4	58	HOL (<6)	GeoB 7149-2	Fontaine et al. (2019) PP	22.0751		1	1	1
-31.4857	-72	3086	6370	223	NA	NaN	NaN	8590	100	NaN	NaN	5581	2996	226	1748	4	58		GeoB 7149-2	Fontaine et al. (2019) PP	15.1057		1	1	1
-31.4857	-72	3086	8025	203	NA	NaN	NaN	8975	50	NaN	NaN	7251	1737	213.75	1748	4	58	EHOL (7-11)	GeoB 7149-2	Fontaine et al. (2019) PP	29.4861		1	1	1
-31.4857	-72	3086	9212	178	NA	NaN	NaN	9940	190	NaN	NaN	8236	1699	239.75	1748	4	58	EHOL (7-11)	GeoB 7149-2	Fontaine et al. (2019) PP	17.301		1	1	1
-31.4857	-72	3086	9501	15	NA	NaN	NaN	10940	130	NaN	NaN	8497.6	2455	130.75	1748	4	58	EHOL (7-11)	GeoB 7149-2	Fontaine et al. (2019) PP	13.089		1	1	1
-31.4857	-72	3086	9883	160	NA	NaN	NaN	10790	70	NaN	NaN	8788.8	1960	113.75	1748	4	58	EHOL (7-11)	GeoB 7149-2	Fontaine et al. (2019) PP	13.089		1	1	1
-31.4857	-72	3086	9883	160	NA	NaN	NaN	11420	630	NaN	NaN	8788.8	2591	624	1748	4	58	EHOL (7-11)	GeoB 7149-2	Fontaine et al. (2019) PP	37.9147		1	1	1
-31.4857	-72	3086	10938	159	NA	NaN	NaN	11290	90	NaN	NaN	9608.6	1703	134.75	1748	4	58	EHOL (7-11)	GeoB 7149-2	Fontaine et al. (2019) PP	35.6993		1	1	1
-31.4857	-72	3086	13319	158	NA	NaN	NaN	13580	170	NaN	NaN	11461	2130	247	1748	4	58	BA (12.8-14.8)	GeoB 7149-2	Fontaine et al. (2019) PP	33.9674		1	1	1
-31.4857	-72	3086	14055	219	NA	NaN	NaN	15520	160	NaN	NaN	12141	3364	233.75	1748	4	58	BA (12.8-14.8)	GeoB 7149-2	Fontaine et al. (2019) PP	37.9107		1	1	1
-31.4857	-72	3086	15242	243	NA	NaN	NaN	15700	370	NaN	NaN	12777	2922	402.25	1748	4	58	HS1 (15-17.5)	GeoB 7149-2	Fontaine et al. (2019) PP	40.1606		1	1	1
-31.4857	-72	3086	15989	302	NA	NaN	NaN	15580	180	NaN	NaN	13299	2272	274.5	1748	4	58	HS1 (15-17.5)	GeoB 7149-2	Fontaine et al. (2019) PP	40.1606		1	1	1
-36.542	-73.675	798	14684	201	NA	NaN	NaN	13750	95	NaN	NaN	12466	1298	124.25	883	4	59	BA (12.8-14.8)	GeoB 7162-6	Fontaine et al. (2019) PP	91.2982		1	1	1
-36.542	-73.675	798	15385	125	NA	NaN	NaN	16550	80	NaN	NaN	12898	3665	120	883	4	59	HS1 (15-17.5)	GeoB 7162-6	Fontaine et al. (2019) PP	102.564		1	1	1
-36.542	-73.675	798	15658	113	NA	NaN	NaN	15100	100	NaN	NaN	13063	2036	135	883	4	59	HS1 (15-17.5)	GeoB 7162-6	Fontaine et al. (2019) PP	100		1	1	1
-36.542	-73.675	798	15778	113	NA	NaN	NaN	15300	110	NaN	NaN	13159	2142	141	883	4	59	HS1 (15-17.5)	GeoB 7162-6	Fontaine et al. (2019) PP	77.3481		1	1	1
-36.542	-73.675	798	16321	133	NA	NaN	NaN	15550	75	NaN	NaN	13536	2014	123	883	4	59	HS1 (15-17.5)	GeoB 7162-6	Fontaine et al. (2019) PP	82.5688		1	1	1
-36.542	-73.675	798	16539	155	NA	NaN	NaN	15520	75	NaN	NaN	13677	1835	126.5	883	4	59	HS1 (15-17.5)	GeoB 7162-6	Fontaine et al. (2019) PP	82.5688		1	1	1
-36.4257	-73.5955	537	16938	170	NA	NaN	NaN	15600	260	NaN	NaN	13891	1668	289	765	4	60	HS1 (15-17.5)	GeoB 7163-7	Fontaine et al. (2019) PP	26.643		1	1	1
-36.4257	-73.5955	537	17501	160	NA	NaN	NaN	15570	170	NaN	NaN	14443	1174	206.5	765	4	60	HS1 (15-17.5)	GeoB 7163-7	Fontaine et al. (2019) PP	701.754		1	1	1
-36.4257	-73.5955	537	17558	145	NA	NaN	NaN	16040	320	NaN	NaN	14463	1612	328.75	765	4	60	HS1 (15-17.5)	GeoB 7163-7	Fontaine et al. (2019) PP	101.215		1	1	1
-36.4257	-73.5955	537	17805	136	NA	NaN	NaN	16170	80	NaN	NaN	14520	1629	121.5	765	4	60		GeoB 7163-7	Fontaine et al. (2019) PP	107.527		1	1	1
-36.4257	-73.5955	537	18084	156	NA	NaN	NaN	16220	70	NaN	NaN	14716	1488	199.5	765	4	60		GeoB 7163-7	Fontaine et al. (2019) PP	100.806		1	1	1
-36.4257	-73.5955	537	18332	169	NA	NaN	NaN	16460	140	NaN	NaN	15200	1365	232.5	765	4	60		GeoB 7163-7	Fontaine et al. (2019) PP	83.3333		1	1	1
-36.4257	-73.5955	537	18632	169	NA	NaN	NaN	16590	60	NaN	NaN	15215	1320	189.25	765	4	60		GeoB 7163-7	Fontaine et al. (2019) PP	100.671		1	1	1
-36.4257	-73.5955	537	18930	184	NA	NaN	NaN	16790	80	NaN	NaN	15694	1105	225	765	4	60	LGM (19-21.8)	GeoB 7163-7	Fontaine et al. (2019) PP	98.8701		1	1	1
-36.4257	-73.5955	537	19284	196	NA	NaN	NaN	16930	90	NaN	NaN	15982	950	197.75	765	4	60	LGM (19-21.8)	GeoB 7163-7	Fontaine et al. (2019) PP	96.5251		1	1	1
-36.4257	-73.5955	537	19543	241	NA	NaN	NaN	17290	70	NaN	NaN	16201	1077	204.75	765	4	60	LGM (19-21.8)	GeoB 7163-7	Fontaine et al. (2019) PP	87.3362		1	1	1
-36.4257	-73.5955	537	19772	241	NA	NaN	NaN	17680	70	NaN	NaN	16346	1284	205.25	765	4	60	LGM (19-21.8)	GeoB 7163-7	Fontaine et al. (2019) PP	87.3362		1	1	1
-36.4532	-73.925	2062	9064	231	NA	NaN	NaN	9980	110	NaN	NaN	8146.6	1843	202	1672	4	61	EHOL (7-11)	GeoB 7167-6	Fontaine et al. (2019) PP	43.7063		1	1	1
-36.4532	-73.925	2062	9064	231	NA	NaN	NaN	10005	20	NaN	NaN	8146.6	1843	161.5	1672	4	61	EHOL (7-11)	GeoB 7167-6	Fontaine et al. (2019) PP	43.7063		1	1	1
-36.4532	-73.925	2062	10208	191	NA	NaN	NaN	11015	35	NaN	NaN	9024	1985	148	1672	4	61	EHOL (7-11)	GeoB 7167-6	Fontaine et al. (2019) PP	43.7063		1	1	1
-36.4532	-73.925	2062	10208	191	NA	NaN	NaN	11100	90	NaN	NaN	9024	2057	175.75	1672	4	61	EHOL (7-11)	GeoB 7167-6	Fontaine et al. (2019) PP	42.1941		1	1	1
-36.4532	-73.925	2062	10445	168	NA	NaN	NaN	11425	35	NaN	NaN	9283	2167	47.25	1672	4	61	EHOL (7-11)	GeoB 7167-6	Fontaine et al. (2019) PP	32.8947		1	1	1
-36.4532	-73.925	2062	10597	149	NA	NaN	NaN	11800	45	NaN	NaN	9414.4	2417	120.5	1672	4	61	EHOL (7-11)	GeoB 7167-6	Fontaine et al. (2019) PP	38.1679		1	1	1
-36.4532	-73.925	2062	10728	141	NA	NaN	NaN	11570	45	NaN	NaN	9492.4	2077	108.75	1672	4	61	EHOL (7-11)	GeoB 7167-6	Fontaine et al. (2019) PP	43.1035		1	1	1
-36.4532	-73.925	2062	11076	127	NA	NaN	NaN	12070	25	NaN	NaN	9615.8	2444	91	1672	4	61	EHOL (7-11)	GeoB 7167-6	Fontaine et al. (2019) PP	33.8983		1	1	1
-36.4532	-73.925	2062	11371	145	NA	NaN	NaN	12250	30	NaN	NaN	9977.2	2274	25.25	1672	4	61		GeoB 7167-6	Fontaine et al. (2019) PP	33.67		1	1	1
-36.4532	-73.925	2062	11668	167	NA	NaN	NaN	12460	100	NaN	NaN	10073	2372	131.75	1672	4	61	YD (11.8-12.7)	GeoB 7167-6	Fontaine et al. (2019) PP	33.67		1	1	1
-36.4532	-73.925	2062	11668	167	NA	NaN	NaN	12575	30	NaN	NaN	10073	2496	92.25	1672	4	61	YD (11.8-12.7)	GeoB 7167-6	Fontaine et al. (2019) PP	23.0947		1	1	1
-36.4532	-73.925	2062	12101	190	NA	NaN	NaN	13160	25	NaN	NaN	10352	2818	93.75	1672	4	61	YD (11.8-12.7)	GeoB 7167-6	Fontaine et al. (2019) PP	21.8818		1	1	1
-36.4532	-73.925	2062	12558	139	NA	NaN	NaN	13195	30	NaN	NaN	10472	2675	115.75	1672	4	61	YD (11.8-12.7)	GeoB 7167-6	Fontaine et al. (2019) PP	16.835		1	1	1
-36.4532	-73.925	2062	13152	143	NA	NaN	NaN	13690	30	NaN	NaN	11230	2422	151.25	1672	4	61	BA (12.8-14.8)	GeoB 7167-6	Fontaine et al. (2019) PP	32.6797		1	1	1
-36.4532	-73.925	2062	13458	115	NA	NaN	NaN	13875	25	NaN	NaN	11579	2288	128.25	1672	4	61	BA (12.8-14.8)	GeoB 7167-6	Fontaine et al. (2019) PP	40.4858		1	1	1
-36.4532	-73.925	2062	13705	120	NA	NaN	NaN	14210	30	NaN	NaN	11827	2369	120.5	1672	4	61	BA (12.8-14.8)	GeoB 7167-6	Fontaine et al. (2019) PP	30.9597		1	1	1
-36.4532	-73.925	2062	14028	163	NA	NaN	NaN	14700	120	NaN	NaN	12082	2572	183.25	1672	4	61	BA (12.8-14.8)	GeoB 7167-6	Fontaine et al. (2019) PP	27.7447		1	1	1
-36.4532	-73.925	2062	16551	206	NA	NaN	NaN	16460	90	NaN	NaN	13687	2767	160	1672	4	61	HS1 (15-17.5)	GeoB 7167-6	Fontaine et al. (2019) PP	30.9358		1	1	1
-36.4532	-73.925	2062	17844	187	NA	NaN	NaN	17490	100	NaN	NaN	14561	2916	162	1672	4	61		GeoB 7167-6	Fontaine et al. (2019) PP	38.7297		1	1	1
-36.4532	-73.925	2062	20426	584	NA	NaN	NaN	19640	70	NaN	NaN	16878	2708	33	1672	4	61	LGM (19-21.8)	GeoB 7167-6	Fontaine et al. (2019) PP	38.7297		1	1	1
54.62	-148.75	3647	9270	376	TS	9305	25	9930	70	625	74	8249	1645	288.5	2074	3	62	EHOL (7-11)	ODP887	Galbraith et al. (2007)	4.09924		1	1	0
54.62	-148.75	3647	12627	237	TS	11810	30	13070	40	1260	50	10600	2484	123.25	2074	3	62		ODP887	Galbraith et al. (2007)	4.03896		1	1	0
54.62	-148.75	3647	13296	100	TS	12530	30	13565	45	1035	54	11388	2142	124	2074	3	62	BA (12.8-14.8)	ODP887	Galbraith et al. (2007)	4.287		1	1	0
54.62	-148.75	3647	13828	174	TS	12995	30	13940	70	945	76	12020	1971	175.25	2074	3	62	BA (12.8-14.8)	ODP887	Galbraith et al. (2007)	4.48366		1	1	0
54.62	-148.75	3647	16696	215	TS	15010	50	16880	70	1870	86	13788	3100	165.75	2074	3	62	HS1 (15-17.5)	ODP887	Galbraith et al. (2007)	5.74988		1	1	0
54.62	-148.75	3647	18421.5	396	TS	16640	45	18290	120	1650	128	15238	3131	392.5	2074	3	62		ODP887	Galbraith et al. (2007)	5.75415		1	1	0
54.62	-148.75	3647	18885.5	396	TS	16405	45	18290	50	1885	67	15631	2635	360.5	2074	3	62	LGM (19-21.8)	ODP887	Galbraith et al. (2007)	5.87753		1	1	0
54.62	-148.75	3647	20120	241	TS	17970	70	19580	180	1610	193	16640	2929	262.75	2074	3	62	LGM (19-21.8)	ODP887	Galbraith et al. (2007)	5.81511		1	1	0
54.39	-148.92	3640	11773	90	S	11080	60	12205	30	1125	67	10148	2072	68	2074	3	63	YD (11.8-12.7)	MD02-2489	Gebhardt et al. (2008); Rae et al. (2014)	14.4778		1	1	1
54.39	-148.92	3640	12740	24	S	11870	30	13145	30	1275	42	10783	2360	81.25	2074	3	63		MD02-2489	Gebhardt et al. (2008); Rae et al. (2014)	35.5731		1	1	1
54.39	-148.92	3640	12993	70	S	12120	70	13320	35	1200	78	11050	2267	77.75	2074	3	63	BA (12.8-14.8)	MD02-2489	Gebhardt et al. (2008); Rae et al. (2014)	18.0053		1	1	1
54.39	-148.92	3640	13548.4	100	C	NaN	NaN	13640	80	NaN	NaN	11708	1933	134.5	2074	3	63	BA (12.8-14.8)	MD02-2489	Gebhardt et al. (2008); Rae et al. (2014)	34.2262		1	1	1
54.39	-148.92	3640	14571	100	C	NaN	NaN	14790	90	NaN	NaN	12454	2349	98	2074	3	63	BA (12.8-14.8)	MD02-2489	Gebhardt et al. (2008); Rae et al. (2014)	26.1982		1	1	1
54.39	-148.92	3640	14933.6	100	C	NaN	NaN	15620	100	NaN	NaN	12528	3080	128.75	2074	3	63	HS1 (15-17.5)	MD02-2489	Gebhardt et al. (2008); Rae et al. (2014)	22.1374		1	1	1
54.39	-148.92	3640	15475.7	100	C	NaN	NaN	15590	110	NaN	NaN	12925	2654	129.25	2074	3	63	HS1 (15-17.5)	MD02-2489	Gebhardt et al. (2008); Rae et al. (2014)	22.1374		1	1	1
54.39	-148.92	3640	15950	100	C	NaN	NaN	15810	110	NaN	NaN	13268	2532	131.25	2074	3	63	HS1 (15-17.5)	MD02-2489	Gebhardt et al. (2008); Rae et al. (2014)	16.0622		1	1	1
54.39	-148.92	3640	16199	100	C	NaN	NaN	15080	100	NaN	NaN	13436	1636	125	2074	3	63	HS1 (15-17.5)	MD02-2489	Gebhardt et al. (2008); Rae et al. (2014)	16.0622		1	1	1
54.39	-148.92	3640	16510.3	100	C	NaN	NaN	15450	100	NaN	NaN	13657	1784	123	2074	3	63	HS1 (15-17.5)	MD02-2489	Gebhardt et al. (2008); Rae et al. (2014)	16.0622		1	1	1
54.39	-148.92	3640	16977.3	100	C	NaN	NaN	16190	120	NaN	NaN	13923	2244	156.25	2074	3	63	HS1 (15-17.5)	MD02-2489	Gebhardt et al. (2008); Rae et al. (2014)	16.0622		1	1	1
54.39	-148.92	3640	17288.5	100	C	NaN	NaN	17090	135	NaN	NaN	14164	2883	167.75	2074	3	63	HS1 (15-17.5)	MD02-2489	Gebhardt et al. (2008); Rae et al. (2014)	17.6529		1	1	1
54.39	-148.92	3640	17940	100	C	NaN	NaN	18120	120	NaN	NaN	14650	3480	144.5	2074	3	63		MD02-2489	Gebhardt et al. (2008); Rae et al. (2014)	29.0323		1	1	1
54.39	-148.92	3640	18663.3	100	C	NaN	NaN	18470	130	NaN	NaN	15289	3179	189.75	2074	3	63		MD02-2489	Gebhardt et al. (2008); Rae et al. (2014)	29.0323		1	1	1
-60	-69	1125	16720	390	C	NaN	NaN	15280	80	NaN	NaN	13800	1484	292.25	1232	8	64	HS1 (15-17.5)	47396B	Goldstein et al. (2001)	NaN		1	1	1
50.11	153.2	1175	5861	44	S	6260	40	7800	70	1540	81	5051.4	2726	86.5	1855	3	65	HOL (<6)	V34-98	Gorbarenko et al. (2002)	23.7161		1	1	1
51.02	148.31	1305	13832	91	S	13040	70	14100	70	1060	99	12016	2117	111.75	1983	3	66	BA (12.8-14.8)	936	Gorbarenko et al. (2004)	10.9167		1	1	1
51.02	148.31	1305	19532	172	S	17530	140	19070	110	1540	178	16182	2874	185.75	1983	3	66	LGM (19-21.8)	936	Gorbarenko et al. (2004)	10.8028		1	1	1
51.02	148.31	1305	24431	210	S	21760	170	21180	100	-580	197	20352	822	186.25	1983	3	66		936	Gorbarenko et al. (2004)	9.82358	Negative B-P	0	0	0
54.5	144.75	1305	3395	18	TS	4205	15	5115	15	910	21	3186	1929	33.5	1987	3	67	HOL (<6)	LV27-2-4	Gorbarenko et al. (2010)	50.0736		1	1	1
54.5	144.75	1305	5889	13	TS	6230	15	6938	25	708	29	5067.8	1862	41.5	1987	3	67	HOL (<6)	LV27-2-4	Gorbarenko et al. (2010)	42.452		1	1	1
54.5	144.75	1305	9035	20	TS	9150	15	10125	20	975	25	8183	1970	47.5	1987	3	67	EHOL (7-11)	LV27-2-4	Gorbarenko et al. (2010)	36.5246		1	1	1
54.5	144.75	1305	11170	32	TS	10760	35	11555	25	795	43	9680	1861	58.75	1987	3	67		LV27-2-4	Gorbarenko et al. (2010)	38.0483		1	1	1
54.5	144.75	1305	14036	26	TS	13150	25	14050	40	900	47	12098	1947	70.75	1987	3	67	BA (12.8-14.8)	LV27-2-4	Gorbarenko et al. (2010)	41.6785		1	1	1
-44.07	-14.2	3770	29090	200	C	25407	85	26600	130	1193	155	24792	1750	265.25	1452	8	68	preLGM (25-30)	MD07-3076	Gottschalk et al. (2016)	7.54555		1	1	0
-44.07	-14.2	3770	32259	200	C	28540	89	29290	160	750	183	28393	945	225.5	1452	8	68		MD07-3076	Gottschalk et al. (2016)	8.23026		1	1	0
-44.07	-14.2	3770	32915	200	C	28827	91	29500	190	673	211	28500	964	257.5	1452	8	68		MD07-3076	Gottschalk et al. (2016)	8.37004		1	1	0
-44.07	-14.2	3770	34508	200	C	30195	411	32280	490	2085	640	30101	2170	580.25	1452	8	68		MD07-3076	Gottschalk et al. (2016)	8.7371		1	1	0
-44.07	-14.2	3770	35382	200	C	31235	316	32204	389	969	501	31047	1173	464.25	1452	8	68		MD07-3076	Gottschalk et al. (2016)	9.03002		1	1	0
-44.07	-14.2	3770	36341	200	C	31533	394	32582	452	1049	600	32081	530	273	1452	8	68		MD07-3076	Gottschalk et al. (2016)	9.28703	Negative direct R	0	0	0
-44.07	-14.2	3770	36907	200	C	32447	438	33400	522	953	681	32549	814	407	1452	8	68		MD07-3076	Gottschalk et al. (2016)	9.36137	Negative direct R	0	0	0
-44.07	-14.2	3770	37332	200	C	32159	463	33081	479	922	666	32945	127	63.5	1452	8	68		MD07-3076	Gottschalk et al. (2016)	9.41551	Negative direct R	0	0	0
-44.07	-14.2	3770	38181	200	C	34174	758	34609	804	435	1105	33389	1203	602.25	1452	8	68		MD07-3076	Gottschalk et al. (2016)	9.52044		1	1	1
-44.07	-14.2	3770	38322	200	C	33429	421	34281	474	852	634	33436	834	417.25	1452	8	68		MD07-3076	Gottschalk et al. (2016)	9.5376	Negative direct R	0	0	0
-44.07	-14.2	3770	38747	200	C	35747	926	36309	1010	562	1370	33581	2714	1000.25	1452	8	68		MD07-3076	Gottschalk et al. (2016)	9.58784		1	1	1
-44.07	-14.2	3770	39713	200	C	35620	916	36499	1042	879	1387	34614	1884	943	1452	8	68		MD07-3076	Gottschalk et al. (2016)	9.75751		1	1	1
-44.07	-14.2	3770	40137	200	C	36236	986	38165	1277	1929	1613	35024	3162	1266	1452	8	68		MD07-3076	Gottschalk et al. (2016)	9.87867		1	1	1
-44.07	-14.2	3770	40654	200	C	35879	680	37364	830	1485	1073	35468	1897	851.25	1452	8	68		MD07-3076	Gottschalk et al. (2016)	10.0236		1	1	1
-47.7313	86.6952	150	8205	237	C	7836	70	NaN	NaN	NaN	NaN	7433	436	255	802	8	69	EHOL (7-11)	MD12-3396	Gottschalk et al. (2020)	23.2541		1	1	1
-47.7313	86.6952	150	11924	292	C	11116	90	NaN	NaN	NaN	NaN	10207	876	165.25	802	8	69	YD (11.8-12.7)	MD12-3396	Gottschalk et al. (2020)	21.9138		1	1	1
-47.7313	86.6952	150	12902	362	C	11711	98	NaN	NaN	NaN	NaN	11004	707	376.25	802	8	69		MD12-3396	Gottschalk et al. (2020)	21.051		1	1	1
-47.7313	86.6952	150	13423	325	C	12094	97	NaN	NaN	NaN	NaN	11537	520	337	802	8	69	BA (12.8-14.8)	MD12-3396	Gottschalk et al. (2020)	20.7703		1	1	1
-47.7313	86.6952	150	14689	282	C	13328	120	NaN	NaN	NaN	NaN	12460	868	177.5	802	8	69	BA (12.8-14.8)	MD12-3396	Gottschalk et al. (2020)	20.9068		1	1	1
-47.7313	86.6952	150	18352	307	C	16468	156	NaN	NaN	NaN	NaN	15224	1378	338.75	802	8	69		MD12-3396	Gottschalk et al. (2020)	18.8753		1	1	1
-47.7313	86.6952	150	27653	850	C	25746	317	NaN	NaN	NaN	NaN	23358	2158	896.25	802	8	69	preLGM (25-30)	MD12-3396	Gottschalk et al. (2020)	15.416		1	1	1
-47.7313	86.6952	150	34093	500	C	31549	1151	NaN	NaN	NaN	NaN	29443	1942	1262.25	802	8	69		MD12-3396	Gottschalk et al. (2020)	16.8334		1	1	1
-47.7313	86.6952	3614	947	165	C	1835	61	2581	62	746	87	1036	1532	183.5	1321	8	69	HOL (<6)	MD12-3396	Gottschalk et al. (2020)	14.7835		1	1	1
-47.7313	86.6952	3614	947	165	C	1835	61	2600	62	765	87	1036	1551	183.5	1321	8	69	HOL (<6)	MD12-3396	Gottschalk et al. (2020)	14.7835		1	1	1
-47.7313	86.6952	3614	1825	230	C	2495	63	3022	71	527	95	1902	1105	202.25	1321	8	69	HOL (<6)	MD12-3396	Gottschalk et al. (2020)	25.2055		1	1	1
-47.7313	86.6952	3614	2306	301	C	2839	62	3527	64	688	89	2233	1236	253.25	1321	8	69	HOL (<6)	MD12-3396	Gottschalk et al. (2020)	26.8864		1	1	1
-47.7313	86.6952	3614	2958	217	C	3434	66	4024	70	590	96	2846	1174	194.25	1321	8	69	HOL (<6)	MD12-3396	Gottschalk et al. (2020)	26.3692		1	1	1
-47.7313	86.6952	3614	4159	281	C	4394	69	4918	70	524	98	3820	1129	210	1321	8	69	HOL (<6)	MD12-3396	Gottschalk et al. (2020)	24.5251		1	1	1
-47.7313	86.6952	3614	5267	270	C	4985	70	6001	122	1016	141	4484	1425	251	1321	8	69	HOL (<6)	MD12-3396	Gottschalk et al. (2020)	23.9225		1	1	1
-47.7313	86.6952	3614	6028	271	C	5814	74	6649	83	835	111	5324.8	1379	266.25	1321	8	69	HOL (<6)	MD12-3396	Gottschalk et al. (2020)	23.5567		1	1	1
-47.7313	86.6952	3614	7275	331	C	6584	77	7349	86	765	115	6371	981	332.5	1321	8	69	EHOL (7-11)	MD12-3396	Gottschalk et al. (2020)	22.8179		1	1	1
-47.7313	86.6952	3614	7637	204	C	7423	82	7593	83	170	117	6794.6	790	248.5	1321	8	69	EHOL (7-11)	MD12-3396	Gottschalk et al. (2020)	22.391		1	1	1
-47.7313	86.6952	3614	7933	205	C	7487	80	8111	87	624	118	7082.2	996	233.25	1321	8	69	EHOL (7-11)	MD12-3396	Gottschalk et al. (2020)	22.9421		1	1	1
-47.7313	86.6952	3614	8270	255	C	7929	85	8447	98	518	130	7417	986	272.75	1321	8	69	EHOL (7-11)	MD12-3396	Gottschalk et al. (2020)	23.2164		1	1	1
-47.7313	86.6952	3614	8975	292	C	8472	91	9278	97	806	133	7970	1211	256.5	1321	8	69	EHOL (7-11)	MD12-3396	Gottschalk et al. (2020)	23.0641		1	1	1
-47.7313	86.6952	3614	9405	340	C	9085	90	9503	93	418	129	8327	1110	277	1321	8	69	EHOL (7-11)	MD12-3396	Gottschalk et al. (2020)	22.8602		1	1	1
-47.7313	86.6952	3614	10254	422	C	10124	109	10204	108	80	153	9162.8	1089	327.75	1321	8	69	EHOL (7-11)	MD12-3396	Gottschalk et al. (2020)	22.2352		1	1	1
-47.7313	86.6952	3614	11114	291	C	10567	102	11068	107	501	148	9657	1371	222.75	1321	8	69	EHOL (7-11)	MD12-3396	Gottschalk et al. (2020)	21.5944		1	1	1
-47.7313	86.6952	3614	11483	253	C	10921	107	11396	115	475	157	10018	1386	208.25	1321	8	69		MD12-3396	Gottschalk et al. (2020)	21.5971		1	1	1
-47.7313	86.6952	3614	11750	254	C	11256	111	11877	115	621	160	10121	1740	176.75	1321	8	69	YD (11.8-12.7)	MD12-3396	Gottschalk et al. (2020)	21.7021		1	1	1
-47.7313	86.6952	3614	11780	257	C	11139	107	11838	139	699	175	10141	1682	193.25	1321	8	69	YD (11.8-12.7)	MD12-3396	Gottschalk et al. (2020)	21.7317		1	1	1
-47.7313	86.6952	3614	12084	330	C	11069	110	12160	119	1091	162	10337	1846	216.75	1321	8	69	YD (11.8-12.7)	MD12-3396	Gottschalk et al. (2020)	21.8471		1	1	1
-47.7313	86.6952	3614	13005	337	C	11838	115	12308	124	470	169	11062	1210	385.5	1321	8	69		MD12-3396	Gottschalk et al. (2020)	20.915		1	1	1
-47.7313	86.6952	3614	13706	294	C	12422	60	12748	130	326	143	11825	889	303.5	1321	8	69	BA (12.8-14.8)	MD12-3396	Gottschalk et al. (2020)	20.7209		1	1	1
-47.7313	86.6952	3614	14206	303	C	12833	123	13235	127	402	177	12306	960	229	1321	8	69	BA (12.8-14.8)	MD12-3396	Gottschalk et al. (2020)	20.6955		1	1	1
-47.7313	86.6952	3614	14299	281	C	12797	138	12957	148	160	202	12342	633	220.75	1321	8	69	BA (12.8-14.8)	MD12-3396	Gottschalk et al. (2020)	20.7007		1	1	1
-47.7313	86.6952	3614	14299	281	C	12797	138	13566	138	769	195	12342	1241	214	1321	8	69	BA (12.8-14.8)	MD12-3396	Gottschalk et al. (2020)	20.7007		1	1	1
-47.7313	86.6952	3614	14603	277	C	13109	137	14150	143	1041	198	12467	1716	187.25	1321	8	69	BA (12.8-14.8)	MD12-3396	Gottschalk et al. (2020)	20.8176		1	1	1
-47.7313	86.6952	3614	14603	277	C	13109	137	14225	143	1116	198	12467	1791	187.25	1321	8	69	BA (12.8-14.8)	MD12-3396	Gottschalk et al. (2020)	20.8176		1	1	1
-47.7313	86.6952	3614	14906	307	C	13412	132	15003	154	1591	203	12512	2448	229.25	1321	8	69		MD12-3396	Gottschalk et al. (2020)	20.9312		1	1	1
-47.7313	86.6952	3614	15805	488	C	14399	144	15525	163	1126	217	13182	2338	367.75	1321	8	69	HS1 (15-17.5)	MD12-3396	Gottschalk et al. (2020)	20.2468		1	1	1
-47.7313	86.6952	3614	17652	458	C	15517	173	15938	181	421	250	14461	1457	410.75	1321	8	69	HS1 (15-17.5)	MD12-3396	Gottschalk et al. (2020)	19.0347		1	1	1
-47.7313	86.6952	3614	18034	353	C	16267	176	17409	195	1142	263	14698	2671	355.75	1321	8	69		MD12-3396	Gottschalk et al. (2020)	18.8533		1	1	1
-47.7313	86.6952	3614	18455	308	C	16106	205	17504	212	1398	295	15210	2333	378.25	1321	8	69		MD12-3396	Gottschalk et al. (2020)	18.8567		1	1	1
-47.7313	86.6952	3614	18642	330	C	17039	190	17613	210	574	283	15239	2274	394.75	1321	8	69		MD12-3396	Gottschalk et al. (2020)	18.8821		1	1	1
-47.7313	86.6952	3614	19594	713	C	17833	200	18650	229	817	304	16300	2366	663	1321	8	69	LGM (19-21.8)	MD12-3396	Gottschalk et al. (2020)	18.3219		1	1	1
-47.7313	86.6952	3614	19594	713	C	17833	200	18678	223	845	300	16300	2393	661.25	1321	8	69	LGM (19-21.8)	MD12-3396	Gottschalk et al. (2020)	18.3219		1	1	1
-47.7313	86.6952	3614	21381	919	C	18879	235	19795	262	916	352	17649	2081	803.5	1321	8	69	LGM (19-21.8)	MD12-3396	Gottschalk et al. (2020)	17.3986		1	1	1
-47.7313	86.6952	3614	22381	1041	C	19992	266	21023	310	1031	408	18454	2443	926	1321	8	69	LGM (19-21.8)	MD12-3396	Gottschalk et al. (2020)	16.9787		1	1	1
-47.7313	86.6952	3614	25465	959	C	22688	356	23969	419	1281	550	21106	2706	971.75	1321	8	69	preLGM (25-30)	MD12-3396	Gottschalk et al. (2020)	15.6686		1	1	1
-47.7313	86.6952	3614	25906	842	C	23494	390	24212	424	718	576	21623	2488	904.5	1321	8	69	preLGM (25-30)	MD12-3396	Gottschalk et al. (2020)	15.5562		1	1	1
-47.7313	86.6952	3614	26003	887	C	22244	340	22679	378	435	508	21860	832	938.25	1321	8	69	preLGM (25-30)	MD12-3396	Gottschalk et al. (2020)	15.5367	Flyer - v young	0	0	0
58.9	-9.6	150	18485	200	C	16602.6	150	NaN	NaN	NaN	NaN	15167	1412.57	259	456	1	70		MD04-2829	Hall et al. (2011)	40		1	1	1
58.9	-9.6	150	19380.6	200	C	17196.9	150	NaN	NaN	NaN	NaN	16018	1142.91	228.25	456	1	70	LGM (19-21.8)	MD04-2829	Hall et al. (2011)	40		1	1	1
58.9	-9.6	150	20297.8	200	C	17920.5	150	NaN	NaN	NaN	NaN	16776	1133.5	227	456	1	70	LGM (19-21.8)	MD04-2829	Hall et al. (2011)	40		1	1	1
58.9	-9.6	150	20921.1	200	C	18619.5	150	NaN	NaN	NaN	NaN	17363	1264.5	225.75	456	1	70	LGM (19-21.8)	MD04-2829	Hall et al. (2011)	40		1	1	1
58.9	-9.6	150	22986.9	200	C	20384.6	150	NaN	NaN	NaN	NaN	19074	1310.62	260.25	456	1	70		MD04-2829	Hall et al. (2011)	40		1	1	1
58.9	-9.6	150	23400.5	200	C	20665.3	150	NaN	NaN	NaN	NaN	19497	1220.33	214.75	456	1	70		MD04-2829	Hall et al. (2011)	40		1	1	1
58.9	-9.6	150	25172.5	200	C	22292.2	150	NaN	NaN	NaN	NaN	20868	1407.25	230.75	456	1	70	preLGM (25-30)	MD04-2829	Hall et al. (2011)	40		1	1	1
58.9	-9.6	150	27921.5	200	C	24688	150	NaN	NaN	NaN	NaN	23920	805	284.25	456	1	70	preLGM (25-30)	MD04-2829	Hall et al. (2011)	40		1	1	1
58.9	-9.6	150	28981.7	200	C	26045.3	150	NaN	NaN	NaN	NaN	24712	1310.35	289	456	1	70	preLGM (25-30)	MD04-2829	Hall et al. (2011)	40		1	1	1
-45	148	1689	16722	64	C	NaN	NaN	14940	45	NaN	NaN	13801	1142	65.25	1281	8	71	HS1 (15-17.5)	TN228-J2-382-1216-1010-01-1689-002	Hines et al. (2015)	NaN		1	1	1
-45	148	1689	17279	109	C	NaN	NaN	15390	45	NaN	NaN	14158	1200	115.5	1281	8	71	HS1 (15-17.5)	TN228-J2-382-1216-1010-01-1689-004	Hines et al. (2015)	NaN		1	1	1
-45	148	1689	17608	164	C	NaN	NaN	15730	50	NaN	NaN	14464	1273	128.5	1281	8	71	HS1 (15-17.5)	TN228-J2-382-1216-1010-01-1689-009	Hines et al. (2015)	NaN		1	1	1
-45	148	1689	33730	145	C	NaN	NaN	29300	230	NaN	NaN	29130	161	79.25	1281	8	71		TN228-J2-382-1216-1010-01-1689-010	Hines et al. (2015)	NaN		1	1	1
-45	148	1689	33730	145	C	NaN	NaN	30470	270	NaN	NaN	29130	1331	305.75	1281	8	71		TN228-J2-382-1216-1010-01-1689-010	Hines et al. (2015)	NaN		1	1	1
-45	148	1523	12615	86	C	NaN	NaN	11450	30	NaN	NaN	10551	887	110.25	1281	8	71	YD (11.8-12.7)	TN228-J2-382-1216-1350-03-1523-002	Hines et al. (2015)	NaN		1	1	1
-45	148	1523	21344	153	C	NaN	NaN	19030	80	NaN	NaN	17601	1388	132.5	1281	8	71	LGM (19-21.8)	TN228-J2-382-1216-1350-03-1523-005	Hines et al. (2015)	NaN		1	1	1
-45	148	1523	20367	109	C	NaN	NaN	18350	70	NaN	NaN	16830	1514	130.5	1281	8	71	LGM (19-21.8)	TN228-J2-382-1216-1350-03-1523-006	Hines et al. (2015)	NaN		1	1	1
-45	148	1523	18333	38	C	NaN	NaN	16130	60	NaN	NaN	15201	939	98.5	1281	8	71		TN228-J2-382-1216-1350-03-1523-007	Hines et al. (2015)	NaN		1	1	1
-45	148	1523	12682	33	C	NaN	NaN	11460	30	NaN	NaN	10627	829	72	1281	8	71	YD (11.8-12.7)	TN228-J2-382-1216-1350-03-1523-008	Hines et al. (2015)	NaN		1	1	1
-45	148	1523	25324	333	C	NaN	NaN	21620	100	NaN	NaN	21076	587	297	1281	8	71	preLGM (25-30)	TN228-J2-382-1216-1350-03-1523-010	Hines et al. (2015)	NaN		1	1	1
-45	148	1575	27579	92	C	NaN	NaN	23070	110	NaN	NaN	23293	252	-133.75	1281	8	71	preLGM (25-30)	TN228-J2-383-1217-0725-01-1575-001	Hines et al. (2015)	NaN	Negative radcal error, poor convergence	0	0	0
-45	148	1575	18102	65	C	NaN	NaN	15995	55	NaN	NaN	14722	1264	90	1281	8	71		TN228-J2-383-1217-0725-01-1575-006	Hines et al. (2015)	NaN		1	1	1
-45	148	1575	26980	96	C	NaN	NaN	23000	110	NaN	NaN	22545	458	160	1281	8	71	preLGM (25-30)	TN228-J2-383-1217-0725-01-1575-010	Hines et al. (2015)	NaN		1	1	1
-45	148	1575	26191	57	C	NaN	NaN	23020	110	NaN	NaN	21967	1046	128	1281	8	71	preLGM (25-30)	TN228-J2-383-1217-0725-01-1575-017	Hines et al. (2015)	NaN		1	1	1
-45	148	1575	19457	108	C	NaN	NaN	17610	60	NaN	NaN	16086	1513	130.5	1281	8	71	LGM (19-21.8)	TN228-J2-383-1217-0725-01-1575-023	Hines et al. (2015)	NaN		1	1	1
-45	148	1460	21408	57	C	NaN	NaN	19220	80	NaN	NaN	17698	1521	116.25	1281	8	71	LGM (19-21.8)	TN228-J2-383-1217-1320-05-1460-007	Hines et al. (2015)	NaN		1	1	1
-45	148	1460	19274	57	C	NaN	NaN	17180	60	NaN	NaN	15979	1203	73.5	1281	8	71	LGM (19-21.8)	TN228-J2-383-1217-1320-05-1460-008	Hines et al. (2015)	NaN		1	1	1
-45	148	1460	19483	61	C	NaN	NaN	17030	60	NaN	NaN	16115	909	104.5	1281	8	71	LGM (19-21.8)	TN228-J2-383-1217-1320-05-1460-009	Hines et al. (2015)	NaN		1	1	1
-45	148	1898	14210	43	C	NaN	NaN	13365	35	NaN	NaN	12308	1062	48.5	1332	8	71	BA (12.8-14.8)	TN228-J2-387-1225-1253-11-1898-001	Hines et al. (2015)	NaN		1	1	1
-45	148	1898	13891	72	C	NaN	NaN	12390	30	NaN	NaN	12065	362	73.25	1332	8	71	BA (12.8-14.8)	TN228-J2-387-1225-1253-11-1898-002	Hines et al. (2015)	NaN		1	1	1
-45	148	1748	14869	53	C	NaN	NaN	13675	40	NaN	NaN	12499	1182	70	1332	8	71		TN228-J2-387-1226-0615-17-1748-009	Hines et al. (2015)	NaN		1	1	1
-45	148	1748	15837	65	C	NaN	NaN	14610	40	NaN	NaN	13207	1405	70.5	1332	8	71	HS1 (15-17.5)	TN228-J2-387-1226-0615-17-1748-014	Hines et al. (2015)	NaN		1	1	1
-45	148	1748	16238	76	C	NaN	NaN	14685	40	NaN	NaN	13465	1216	76	1332	8	71	HS1 (15-17.5)	TN228-J2-387-1226-0615-17-1748-015	Hines et al. (2015)	NaN		1	1	1
-45	148	1748	16129	71	C	NaN	NaN	14765	40	NaN	NaN	13392	1369	68.5	1332	8	71	HS1 (15-17.5)	TN228-J2-387-1226-0615-17-1748-020	Hines et al. (2015)	NaN		1	1	1
-45	148	1680	14464	52	C	NaN	NaN	13275	40	NaN	NaN	12408	863	49.5	1281	8	71	BA (12.8-14.8)	TN228-J2-387-1226-1148-20-1680-003	Hines et al. (2015)	NaN		1	1	1
-45	148	1680	13354	90	C	NaN	NaN	12570	35	NaN	NaN	11510	1078	108.75	1281	8	71	BA (12.8-14.8)	TN228-J2-387-1226-1148-20-1680-005	Hines et al. (2015)	NaN		1	1	1
-45	148	1680	14161	82	C	NaN	NaN	13090	35	NaN	NaN	12270	819	91.25	1281	8	71	BA (12.8-14.8)	TN228-J2-387-1226-1148-20-1680-008	Hines et al. (2015)	NaN		1	1	1
-45	148	1680	14186	50	C	NaN	NaN	13040	35	NaN	NaN	12292	751	53	1281	8	71	BA (12.8-14.8)	TN228-J2-387-1226-1148-20-1680-008	Hines et al. (2015)	NaN		1	1	1
-45	148	1680	14198	50	C	NaN	NaN	13220	35	NaN	NaN	12301	924	52	1281	8	71	BA (12.8-14.8)	TN228-J2-387-1226-1148-20-1680-008	Hines et al. (2015)	NaN		1	1	1
-45	148	1680	14347	66	C	NaN	NaN	13425	35	NaN	NaN	12391	1046	55.5	1281	8	71	BA (12.8-14.8)	TN228-J2-387-1226-1148-20-1680-013	Hines et al. (2015)	NaN		1	1	1
-45	148	1680	14373	50	C	NaN	NaN	13475	35	NaN	NaN	12398	1084	49.5	1281	8	71	BA (12.8-14.8)	TN228-J2-387-1226-1148-20-1680-013	Hines et al. (2015)	NaN		1	1	1
-45	148	1680	14392	50	C	NaN	NaN	13430	35	NaN	NaN	12396	1034	46.75	1281	8	71	BA (12.8-14.8)	TN228-J2-387-1226-1148-20-1680-013	Hines et al. (2015)	NaN		1	1	1
-45	148	1680	14578	80	C	NaN	NaN	13345	40	NaN	NaN	12457	897	55.75	1281	8	71	BA (12.8-14.8)	TN228-J2-387-1226-1148-20-1680-017	Hines et al. (2015)	NaN		1	1	1
-45	148	1616	14831	35	C	NaN	NaN	13485	45	NaN	NaN	12465	1024	70	1281	8	71	BA (12.8-14.8)	TN228-J2-387-1226-1507-22-1616-004	Hines et al. (2015)	NaN		1	1	1
-45	148	1599	13852	139	C	NaN	NaN	12865	35	NaN	NaN	12016	863	132.75	1281	8	71	BA (12.8-14.8)	TN228-J2-387-1226-1635-23-1599-001	Hines et al. (2015)	NaN		1	1	1
-45	148	1599	13875	50	C	NaN	NaN	12865	35	NaN	NaN	12048	833	59.75	1281	8	71	BA (12.8-14.8)	TN228-J2-387-1226-1635-23-1599-001	Hines et al. (2015)	NaN		1	1	1
-45	148	1599	13892	50	C	NaN	NaN	12890	35	NaN	NaN	12065	855	54	1281	8	71	BA (12.8-14.8)	TN228-J2-387-1226-1635-23-1599-001	Hines et al. (2015)	NaN		1	1	1
-45	148	1599	13817	63	C	NaN	NaN	12775	35	NaN	NaN	12022	787	83.75	1281	8	71	BA (12.8-14.8)	TN228-J2-387-1226-1635-23-1599-002	Hines et al. (2015)	NaN		1	1	1
-45	148	1599	13836	50	C	NaN	NaN	12655	35	NaN	NaN	12013	644	75.75	1281	8	71	BA (12.8-14.8)	TN228-J2-387-1226-1635-23-1599-002	Hines et al. (2015)	NaN		1	1	1
-45	148	1599	13851	50	C	NaN	NaN	12565	35	NaN	NaN	12015	544	71	1281	8	71	BA (12.8-14.8)	TN228-J2-387-1226-1635-23-1599-002	Hines et al. (2015)	NaN		1	1	1
-45	148	1599	13620	79	C	NaN	NaN	12395	35	NaN	NaN	11845	605	88.25	1281	8	71	BA (12.8-14.8)	TN228-J2-387-1226-1635-23-1599-003	Hines et al. (2015)	NaN		1	1	1
-45	148	1599	13639	50	C	NaN	NaN	12410	30	NaN	NaN	11808	597	65	1281	8	71	BA (12.8-14.8)	TN228-J2-387-1226-1635-23-1599-003	Hines et al. (2015)	NaN		1	1	1
-45	148	1599	13653	50	C	NaN	NaN	12375	35	NaN	NaN	11819	556	64.25	1281	8	71	BA (12.8-14.8)	TN228-J2-387-1226-1635-23-1599-003	Hines et al. (2015)	NaN		1	1	1
-45	148	1599	13311	70	C	NaN	NaN	12385	30	NaN	NaN	11437	946	79.25	1281	8	71	BA (12.8-14.8)	TN228-J2-387-1226-1635-23-1599-004	Hines et al. (2015)	NaN		1	1	1
-45	148	1599	13323	50	C	NaN	NaN	12350	35	NaN	NaN	11469	892	69	1281	8	71	BA (12.8-14.8)	TN228-J2-387-1226-1635-23-1599-004	Hines et al. (2015)	NaN		1	1	1
-45	148	1599	13336	50	C	NaN	NaN	12355	35	NaN	NaN	11482	879	68.75	1281	8	71	BA (12.8-14.8)	TN228-J2-387-1226-1635-23-1599-004	Hines et al. (2015)	NaN		1	1	1
-45	148	1599	14898	132	C	NaN	NaN	13365	35	NaN	NaN	12509	849	101.5	1281	8	71		TN228-J2-387-1226-1635-23-1599-005	Hines et al. (2015)	NaN		1	1	1
-45	148	1599	14912	50	C	NaN	NaN	13225	35	NaN	NaN	12515	704	61.25	1281	8	71		TN228-J2-387-1226-1635-23-1599-005	Hines et al. (2015)	NaN		1	1	1
-45	148	1599	14928	50	C	NaN	NaN	13185	35	NaN	NaN	12524	654	61	1281	8	71		TN228-J2-387-1226-1635-23-1599-005	Hines et al. (2015)	NaN		1	1	1
-45	148	1599	13922	79	C	NaN	NaN	12845	35	NaN	NaN	12048	810	82	1281	8	71	BA (12.8-14.8)	TN228-J2-387-1226-1635-23-1599-020	Hines et al. (2015)	NaN		1	1	1
-45	148	1448	11951	67	C	NaN	NaN	11240	25	NaN	NaN	10281	975	55.5	1281	8	71	YD (11.8-12.7)	TN228-J2-387-1226-2330-25-1448-001	Hines et al. (2015)	NaN		1	1	1
-45	148	1428	8981	107	C	NaN	NaN	8685	20	NaN	NaN	7986	663	84.25	1184	8	71	EHOL (7-11)	TN228-J2-389-0101-0330-01-1428-010	Hines et al. (2015)	NaN		1	1	1
-45	148	1442	15056	67	C	NaN	NaN	13540	35	NaN	NaN	12629	908	71.5	1281	8	71	HS1 (15-17.5)	TN228-J2-393-0112-0730-13-1442-003	Hines et al. (2015)	NaN		1	1	1
-45	148	1442	12205	131	C	NaN	NaN	11010	25	NaN	NaN	10410	640	53.5	1281	8	71	YD (11.8-12.7)	TN228-J2-393-0112-0730-13-1442-008	Hines et al. (2015)	NaN		1	1	1
-45	148	1947	13199	39	C	NaN	NaN	12465	30	NaN	NaN	11356	1131	60	1332	8	71	BA (12.8-14.8)	TN228-J2-395-0113-1830-05-1947-003	Hines et al. (2015)	NaN		1	1	1
-45	148	1500	23338	75	C	NaN	NaN	19950	80	NaN	NaN	19410	523	115.25	1281	8	71		TN228-J2-395-0114-0057-09-1500-002	Hines et al. (2015)	NaN		1	1	1
-45	148	1500	25526	209	C	NaN	NaN	21810	100	NaN	NaN	21104	655	239.75	1281	8	71	preLGM (25-30)	TN228-J2-395-0114-0057-09-1500-008	Hines et al. (2015)	NaN		1	1	1
-45	148	1500	25198	144	C	NaN	NaN	22210	100	NaN	NaN	20903	1299	176	1281	8	71	preLGM (25-30)	TN228-J2-395-0114-0057-09-1500-010	Hines et al. (2015)	NaN		1	1	1
-45	148	1500	25231	50	C	NaN	NaN	22250	100	NaN	NaN	20950	1299	133.75	1281	8	71	preLGM (25-30)	TN228-J2-395-0114-0057-09-1500-010	Hines et al. (2015)	NaN		1	1	1
38.5	-55.5	1176	14350	291	NA	NaN	NaN	12620	30	NaN	NaN	12393	251	155.25	665	1	72	BA (12.8-14.8)	ALV-see notes	Hines et al. 2019	NaN		1	1	1
38.5	-55.5	1222	11081	304	NA	NaN	NaN	10280	30	NaN	NaN	9623.6	638	201.5	662	1	72	EHOL (7-11)	ALV-see notes	Hines et al. 2019	NaN		1	1	1
38.5	-55.5	1222	12310	581	NA	NaN	NaN	11055	25	NaN	NaN	10365	662	30.25	662	1	72	BA (12.8-14.8)	ALV-see notes	Hines et al. 2019	NaN		1	1	1
38.5	-55.5	1222	13332	173	NA	NaN	NaN	12210	30	NaN	NaN	11479	738	24.5	662	1	72	BA (12.8-14.8)	ALV-see notes	Hines et al. 2019	NaN		1	1	1
38.5	-55.5	1713	15674	379	NA	NaN	NaN	14150	35	NaN	NaN	13077	1064	271	661	1	72	HS1 (15-17.5)	ALV-see notes	Hines et al. 2019	NaN		1	1	1
38.5	-55.5	1713	16000	251	NA	NaN	NaN	14875	40	NaN	NaN	13309	1560	184	661	1	72	HS1 (15-17.5)	ALV-see notes	Hines et al. 2019	NaN		1	1	1
38.5	-55.5	1713	16342	144	NA	NaN	NaN	14780	40	NaN	NaN	13556	1226	111.5	661	1	72	HS1 (15-17.5)	ALV-see notes	Hines et al. 2019	NaN		1	1	1
38.5	-55.5	1713	29959	249	NA	NaN	NaN	27300	160	NaN	NaN	25573	1678	330.75	661	1	72	preLGM (25-30)	ALV-see notes	Hines et al. 2019	NaN		1	1	1
35.5	-50.5	1427	17375	136	NA	NaN	NaN	15055	40	NaN	NaN	14289	757	120.5	661	1	72	HS1 (15-17.5)	RBDASS05-see Notes	Hines et al. 2019	NaN		1	1	1
35.5	-50.5	1494	17000	143	NA	NaN	NaN	15400	40	NaN	NaN	13947	1439	121.5	657	1	72	HS1 (15-17.5)	RBDASS05-see Notes	Hines et al. 2019	NaN		1	1	1
35.5	-50.5	1494	17421	155	NA	NaN	NaN	15290	40	NaN	NaN	14364	928	123.25	657	1	72	HS1 (15-17.5)	RBDASS05-see Notes	Hines et al. 2019	NaN		1	1	1
35.5	-50.5	1494	23520	107	NA	NaN	NaN	19960	80	NaN	NaN	19552	454	116.75	657	1	72		RBDASS05-see Notes	Hines et al. 2019	NaN		1	1	1
35.5	-50.5	1494	24634	310	NA	NaN	NaN	22130	90	NaN	NaN	20485	1645	251.5	657	1	72		RBDASS05-see Notes	Hines et al. 2019	NaN		1	1	1
35.5	-50.5	1494	25240	212	NA	NaN	NaN	22490	90	NaN	NaN	20963	1530	198.25	657	1	72	preLGM (25-30)	RBDASS05-see Notes	Hines et al. 2019	NaN		1	1	1
35.5	-50.5	1494	25388	93	NA	NaN	NaN	21740	80	NaN	NaN	21120	648	112.5	657	1	72	preLGM (25-30)	RBDASS05-see Notes	Hines et al. 2019	NaN		1	1	1
35.5	-50.5	1583	25484	122	NA	NaN	NaN	21770	90	NaN	NaN	21102	647	129.25	657	1	72	preLGM (25-30)	RBDASS05-see Notes	Hines et al. 2019	NaN		1	1	1
35.5	-50.5	1583	26806	142	NA	NaN	NaN	24310	120	NaN	NaN	22360	1882	166	657	1	72	preLGM (25-30)	RBDASS05-see Notes	Hines et al. 2019	NaN		1	1	1
35.5	-50.5	1610	16648	404	NA	NaN	NaN	14755	40	NaN	NaN	13761	994	273.25	657	1	72	HS1 (15-17.5)	RBDASS05-see Notes	Hines et al. 2019	NaN		1	1	1
35.5	-50.5	1610	16743	225	NA	NaN	NaN	15030	40	NaN	NaN	13809	1224	166.5	657	1	72	HS1 (15-17.5)	RBDASS05-see Notes	Hines et al. 2019	NaN		1	1	1
35.5	-50.5	1610	17216	285	NA	NaN	NaN	15060	40	NaN	NaN	14151	898	202.25	657	1	72	HS1 (15-17.5)	RBDASS05-see Notes	Hines et al. 2019	NaN		1	1	1
35.5	-50.5	1610	17594	177	NA	NaN	NaN	15315	40	NaN	NaN	14465	862	135.5	657	1	72	HS1 (15-17.5)	RBDASS05-see Notes	Hines et al. 2019	NaN		1	1	1
35.5	-50.5	1610	23193	91	NA	NaN	NaN	20850	80	NaN	NaN	19321	1531	118.75	657	1	72		RBDASS05-see Notes	Hines et al. 2019	NaN		1	1	1
35.5	-50.5	1610	23193	276	NA	NaN	NaN	20860	80	NaN	NaN	19321	1542	255	657	1	72		RBDASS05-see Notes	Hines et al. 2019	NaN		1	1	1
35.5	-50.5	1610	24974	54	NA	NaN	NaN	21680	80	NaN	NaN	20680	998	101.5	657	1	72	preLGM (25-30)	RBDASS05-see Notes	Hines et al. 2019	NaN		1	1	1
35.5	-50.5	1610	25577	230	NA	NaN	NaN	22030	90	NaN	NaN	21132	840	283	657	1	72	preLGM (25-30)	RBDASS05-see Notes	Hines et al. 2019	NaN		1	1	1
35.5	-50.5	1634	28271	190	NA	NaN	NaN	23880	110	NaN	NaN	24093	-225	167.5	657	1	72	preLGM (25-30)	RBDASS05-see Notes	Hines et al. 2019	NaN	Negative B-Atm	0	0	0
35.5	-50.5	1634	28612	238	NA	NaN	NaN	25350	130	NaN	NaN	24301	1008	250.25	657	1	72	preLGM (25-30)	RBDASS05-see Notes	Hines et al. 2019	NaN		1	1	1
35.5	-50.5	1634	30848	204	NA	NaN	NaN	27220	160	NaN	NaN	26479	716	337.75	657	1	72		RBDASS05-see Notes	Hines et al. 2019	NaN		1	1	1
35.5	-50.5	1640	23286	208	NA	NaN	NaN	19900	70	NaN	NaN	19378	519	12.5	657	1	72		RBDASS05-see Notes	Hines et al. 2019	NaN		1	1	1
35.5	-50.5	1640	23745	148	NA	NaN	NaN	20840	80	NaN	NaN	19586	1205	206.25	657	1	72		RBDASS05-see Notes	Hines et al. 2019	NaN		1	1	1
35.5	-50.5	1640	24993	82	NA	NaN	NaN	21790	80	NaN	NaN	20699	1090	113.75	657	1	72	preLGM (25-30)	RBDASS05-see Notes	Hines et al. 2019	NaN		1	1	1
35.5	-50.5	1640	25175	105	NA	NaN	NaN	21660	90	NaN	NaN	20872	780	154	657	1	72	preLGM (25-30)	RBDASS05-see Notes	Hines et al. 2019	NaN		1	1	1
35.5	-50.5	1640	25197	169	NA	NaN	NaN	22290	100	NaN	NaN	20902	1380	185.75	657	1	72	preLGM (25-30)	RBDASS05-see Notes	Hines et al. 2019	NaN		1	1	1
35.5	-50.5	1640	25342	124	NA	NaN	NaN	21490	80	NaN	NaN	21095	430	138	657	1	72	preLGM (25-30)	RBDASS05-see Notes	Hines et al. 2019	NaN		1	1	1
35.5	-50.5	1640	25526	148	NA	NaN	NaN	22340	90	NaN	NaN	21104	1194	158.5	657	1	72	preLGM (25-30)	RBDASS05-see Notes	Hines et al. 2019	NaN		1	1	1
35.5	-50.5	1640	27876	199	NA	NaN	NaN	24660	120	NaN	NaN	23864	821	271.25	657	1	72	preLGM (25-30)	RBDASS05-see Notes	Hines et al. 2019	NaN		1	1	1
35.5	-50.5	1751	17081	228	NA	NaN	NaN	15130	45	NaN	NaN	14082	1063	185.75	667	1	72	HS1 (15-17.5)	RBDASS05-see Notes	Hines et al. 2019	NaN		1	1	1
35.5	-50.5	1751	17357	318	NA	NaN	NaN	15435	45	NaN	NaN	14257	1151	227	667	1	72	HS1 (15-17.5)	RBDASS05-see Notes	Hines et al. 2019	NaN		1	1	1
42.23	144.21	1212	10166	61	TS	9840	40	10700	70	860	81	8932.8	1747	115.5	2080	3	73	EHOL (7-11)	GH02-1030	Ikehara et al. (2006)	20.6571		1	1	1
42.23	144.21	1212	10650	87	TS	10240	60	10800	70	560	92	9404	1375	105.5	2080	3	73	EHOL (7-11)	GH02-1030	Ikehara et al. (2006)	20.6573		1	1	1
42.23	144.21	1212	11068.5	78	TS	10510	60	11190	60	680	85	9584.9	1578	91.5	2080	3	73	EHOL (7-11)	GH02-1030	Ikehara et al. (2006)	21.2314		1	1	1
42.23	144.21	1212	11288	71	TS	10690	60	11370	60	680	85	9935	1457	110.5	2080	3	73		GH02-1030	Ikehara et al. (2006)	21.6159		1	1	1
42.23	144.21	1212	11721	100	TS	10950	60	11610	70	660	92	10090	1505	92.25	2080	3	73	YD (11.8-12.7)	GH02-1030	Ikehara et al. (2006)	22.2677		1	1	1
42.23	144.21	1212	13882	104	TS	12900	70	13510	80	610	106	12057	1496	124.5	2080	3	73	BA (12.8-14.8)	GH02-1030	Ikehara et al. (2006)	20.8904		1	1	1
42.23	144.21	1212	14272	97	TS	13270	70	13900	70	630	99	12327	1565	93.25	2080	3	73	BA (12.8-14.8)	GH02-1030	Ikehara et al. (2006)	21.5457		1	1	1
42.23	144.21	1212	14432	121	TS	13060	70	14500	50	1440	86	12399	2096	72.75	2080	3	73	BA (12.8-14.8)	GH02-1030	Ikehara et al. (2006)	22.4155		1	1	1
42.23	144.21	1212	14913	65	TS	13470	40	14160	40	690	57	12515	1638	74.5	2080	3	73		GH02-1030	Ikehara et al. (2006)	23.1677		1	1	1
42.23	144.21	1212	16867	243	TS	15090	50	15560	80	470	94	13852	1687	191.5	2080	3	73	HS1 (15-17.5)	GH02-1030	Ikehara et al. (2006)	23.9225		1	1	1
42.23	144.21	1212	16976	78	TS	15010	80	16010	90	1000	120	13922	2072	125.25	2080	3	73	HS1 (15-17.5)	GH02-1030	Ikehara et al. (2006)	25.6539		1	1	1
42.23	144.21	1212	17124	66	TS	15140	60	16140	80	1000	100	14143	2023	109.25	2080	3	73	HS1 (15-17.5)	GH02-1030	Ikehara et al. (2006)	27.1841		1	1	1
42.23	144.21	1212	18517	87	TS	16380	60	17230	100	850	117	15118	2057	125.5	2080	3	73		GH02-1030	Ikehara et al. (2006)	28.2443		1	1	1
42.23	144.21	1212	20100	102	TS	17780	70	18730	120	950	139	16624	2099	143.5	2080	3	73	LGM (19-21.8)	GH02-1030	Ikehara et al. (2006)	27.7612		1	1	1
42.23	144.21	1212	21762	204	TS	19130	180	20590	180	1460	255	17847	2709	224.25	2080	3	73	LGM (19-21.8)	GH02-1030	Ikehara et al. (2006)	28.9495		1	1	1
34.2191	137.712	1076	2731	39	TS	3180	40	6480	40	3300	57	2573	3908	87.5	1752	3	74	HOL (<6)	BO04-PC11	Ikehara et al. (2011)	13.9143	Time-series flag	1	1	1
34.2191	137.712	1076	8690	62	TS	8430	40	10810	40	2380	57	7906	2895	65	1752	3	74	EHOL (7-11)	BO04-PC11	Ikehara et al. (2011)	11.7376	Time-series flag	1	1	1
34.2191	137.712	1076	13360	62	TS	12120	60	15300	50	3180	78	11519	3803	85.75	1752	3	74	BA (12.8-14.8)	BO04-PC11	Ikehara et al. (2011)	12.8368	Time-series flag	1	1	1
34.2191	137.712	1076	18482	78	TS	16640	60	18360	80	1720	100	15172	3182	104.25	1752	3	74		BO04-PC11	Ikehara et al. (2011)	13.0668	Time-series flag	1	1	1
34.2191	137.712	1076	19071	97	TS	17210	80	19900	90	2690	120	15807	4083	128.75	1752	3	74	LGM (19-21.8)	BO04-PC11	Ikehara et al. (2011)	13.1876	Time-series flag	1	1	1
27.47	-112.1	818	2729	31	S	3420	35	4080	30	660	46	2572	1515	76.5	1472	3	75	HOL (<6)	AII125-8 GGC55	Keigwin (2002)	21.9861	methane diagenesis noted	0	0	0
27.47	-112.1	818	4343	50	S	4710	40	5220	25	510	47	3875	1328	48.5	1472	3	75	HOL (<6)	AII125-8 GGC55	Keigwin (2002)	48.3537	methane diagenesis noted	0	0	0
27.47	-112.1	818	5463	54	S	5610	45	6130	35	520	57	4701.2	1413	64.25	1472	3	75	HOL (<6)	AII125-8 GGC55	Keigwin (2002)	58.5759	methane diagenesis noted	0	0	0
27.47	-112.1	818	5483	63	TS	5630	60	6170	35	540	69	4775.4	1431	76.25	1472	3	76	HOL (<6)	AII125-8 JPC56	Keigwin (2002)	18.2382	methane diagenesis noted	0	0	0
27.47	-112.1	818	9540	79	TS	9355	70	9280	35	-75	78	8585	687	116.75	1472	3	76	EHOL (7-11)	AII125-8 JPC56	Keigwin (2002)	44.0252	methane diagenesis noted	0	0	0
27.47	-112.1	818	10035	101	TS	9705	75	9520	45	-185	87	8884	631	78	1472	3	76	EHOL (7-11)	AII125-8 JPC56	Keigwin (2002)	46.8361	methane diagenesis noted	0	0	0
27.47	-112.1	818	10579	126	TS	10125	80	10550	60	425	100	9375.4	1183	117.75	1472	3	76	EHOL (7-11)	AII125-8 JPC56	Keigwin (2002)	61.4425	methane diagenesis noted	0	0	0
27.47	-112.1	818	11753	120	TS	10945	75	11350	45	405	87	10127	1227	85.75	1472	3	76	YD (11.8-12.7)	AII125-8 JPC56	Keigwin (2002)	76.5762	methane diagenesis noted	0	0	0
27.47	-112.1	818	12539	92	TS	11490	90	12050	45	560	101	10516	1546	99.75	1472	3	76	YD (11.8-12.7)	AII125-8 JPC56	Keigwin (2002)	79.7512	methane diagenesis noted	0	0	0
27.47	-112.1	818	13393	85	TS	12395	80	12950	60	555	100	11511	1425	117	1472	3	76	BA (12.8-14.8)	AII125-8 JPC56	Keigwin (2002)	82.1325	methane diagenesis noted	0	0	0
27.47	-112.1	818	14864	146	TS	13400	90	13950	55	550	105	12496	1450	109.5	1472	3	76		AII125-8 JPC56	Keigwin (2002)	94.1873	methane diagenesis noted	0	0	0
27.47	-112.1	818	15245	128	TS	13685	100	14150	55	465	114	12779	1365	114.5	1472	3	76	HS1 (15-17.5)	AII125-8 JPC56	Keigwin (2002)	104.952	methane diagenesis noted	0	0	0
27.47	-112.1	818	16408	131	TS	14580	100	14700	65	120	119	13607	1101	116	1472	3	76	HS1 (15-17.5)	AII125-8 JPC56	Keigwin (2002)	103.608	methane diagenesis noted	0	0	0
27.47	-112.1	818	16786	121	TS	14870	100	15550	60	680	117	13823	1726	97	1472	3	76	HS1 (15-17.5)	AII125-8 JPC56	Keigwin (2002)	110.211	methane diagenesis noted	0	0	0
49.142	150.337	1227	19457	101	S	17200	80	18650	110	1450	136	16086	2547	157	1974	3	77	LGM (19-21.8)	B34-91	Keigwin (2002)	11.564		1	1	1
48.608	150.428	1980	19733	99	S	17650	80	19200	110	1550	136	16353	2832	132.75	2087	3	78	LGM (19-21.8)	Nesmeyanov25-1 GGC15	Keigwin (2002)	8.61501		1	1	0
48.752	150.431	1700	18163	144	S	16250	120	17800	140	1550	184	14766	2971	233.5	2087	3	79		Nesmeyanov25-1 GGC18	Keigwin (2002)	11.8923		1	1	1
48.874	150.432	1510	19367	119	S	17350	100	18700	140	1350	172	16010	2667	172.75	2030	3	80	LGM (19-21.8)	Nesmeyanov25-1 GGC20	Keigwin (2002)	11.8759		1	1	1
49.601	150.18	995	18695	223	S	16750	200	18200	95	1450	221	15348	2842	248.75	1771	3	81		Nesmeyanov25-1 GGC27	Keigwin (2002)	3.74432		1	1	0
29.7	-73.4	3845	19185	118	S	16650	100	17650	140	1000	172	15930	1738	167.25	800	1	82	LGM (19-21.8)	KNR140 GGC26	Keigwin (2004)	17.0967		1	1	1
32.02	-76.07	2590	21250	140	S	18350	95	18950	120	600	153	17575	1363	154	734	1	83	LGM (19-21.8)	KNR140 GGC43	Keigwin (2004)	8.4		1	1	0
32.75	-76.23	1903	12578	45	S	11200	50	11400	65	200	82	10472	882	80.75	703	1	84	YD (11.8-12.7)	KNR140 GGC50	Keigwin (2004)	14.8275		1	1	1
32.78	-76.28	1790	12694	51	S	11350	65	11650	100	300	119	10650	983	146	703	1	85	YD (11.8-12.7)	KNR140 GGC51	Keigwin (2004)	24.421		1	1	1
32.5	-76.3	2155	12923	57	S	11600	50	11750	60	150	78	11032	732	74	714	1	86	BA (12.8-14.8)	KNR140 GGC66	Keigwin (2004)	6.88695		1	1	0
32.38	-76.38	2243	12869	71	S	11550	70	11600	80	50	106	10965	626	109.5	714	1	87	BA (12.8-14.8)	KNR140 JPC01	Keigwin (2004)	7.38208		1	1	0
29.07	-72.9	4250	12290	87	S	10950	55	12550	170	1600	179	10417	2164	169.75	849	1	88	YD (11.8-12.7)	KNR140 JPC12	Keigwin (2004)	6.42799		1	1	0
29.07	-72.9	4250	18208	84	S	15750	75	17300	95	1550	121	14854	2422	183.5	849	1	88		KNR140 JPC12	Keigwin (2004)	12.6043		1	1	1
28.25	-74.4	4712	18161	106	S	15700	95	17150	140	1450	169	14763	2336	215.75	917	1	89		KNR140 JPC22	Keigwin (2004)	9.25059		1	1	0
32.23	-76.28	2394	12365	193	S	11050	160	12300	70	1250	175	10366	1891	132.5	734	1	90	YD (11.8-12.7)	KNR140 PG02	Keigwin (2004)	5.86332		1	1	0
33.69	-57.575	4600	17079	69	S	14800	60	15970	120	1170	134	14078	1904	148.25	934	1	91	HS1 (15-17.5)	HU89038-8PC	Keigwin and Boyle (2008)	21.3713		1	1	1
33.69	-57.575	4600	19247	110	S	16700	90	18200	160	1500	184	15971	2244	177.25	934	1	91	LGM (19-21.8)	HU89038-8PC	Keigwin and Boyle (2008)	29.8748		1	1	1
33.69	-57.575	4600	17025	75	S	14750	65	15800	90	1050	111	13981	1806	129.5	934	1	92	HS1 (15-17.5)	OCE326 GGC5	Keigwin and Boyle (2008)	12.9809		1	1	1
27.9	-111.65	655	19617	159	S	17000	130	17650	120	650	177	16340	1365	185	1309	3	93	LGM (19-21.8)	DSDP480	Keigwin and Lehman (2015)	5.55641		1	1	0
-0.374	-106.179	3606	3290	22	TS	3555	15	5605	25	2050	29	3074	2533	34	2003	4	94	HOL (<6)	KNR73 3PC	Keigwin and Lehman (2015)	6.68693		1	1	0
-0.374	-106.179	3606	6909	30	TS	6620	25	8070	30	1450	39	6062.8	2015	42.75	2003	4	94		KNR73 3PC	Keigwin and Lehman (2015)	4.4869		1	1	0
-0.374	-106.179	3606	17001	96	TS	14727.5	80	17580	110	2852.5	136	13948	3610	149.75	2003	4	94	HS1 (15-17.5)	KNR73 3PC	Keigwin and Lehman (2015)	3.8233		1	1	0
-0.374	-106.179	3606	25752	186	TS	22380	190	24630	230	2250	298	21373	3235	343.5	2003	4	94	preLGM (25-30)	KNR73 3PC	Keigwin and Lehman (2015)	3.14539		1	1	0
-0.374	-106.179	3606	28878	269	TS	25520	250	28240	420	2720	489	24660	3597	507.75	2003	4	94	preLGM (25-30)	KNR73 3PC	Keigwin and Lehman (2015)	3.08193		1	1	0
1.848	-110.268	3681	5323	21	TS	5170	15	6235	40	1065	43	4648.8	1592	71	2017	3	95	HOL (<6)	KNR73 4PC	Keigwin and Lehman (2015)	3.28762		1	1	0
1.848	-110.268	3681	6753	32	TS	6487.5	25	8450	50	1962.5	56	5954.2	2516	63	2017	3	95		KNR73 4PC	Keigwin and Lehman (2015)	4.07226		1	1	0
1.848	-110.268	3681	13332	49	S	12010	45	16920	130	4910	138	11479	5455	142	2017	3	95	BA (12.8-14.8)	KNR73 4PC	Keigwin and Lehman (2015)	3.26283	Apparent flyer, extremely high age	0	0	0
1.848	-110.268	3681	18019	77	TS	15550	75	20100	71.0634	4550	103	14692	5410.37	92.75	2017	3	95		KNR73 4PC	Keigwin and Lehman (2015)	2.96909	Time-series flag	1	1	0
1.848	-110.268	3681	24029	150	TS	20830	140	25100	140	4270	198	20031	5068	221.75	2017	3	95		KNR73 4PC	Keigwin and Lehman (2015)	2.87153	Time-series flag	1	1	0
1.848	-110.268	3681	26781	142	TS	23365	120	27040	360	3675	379	22356	4618	370.5	2017	3	95	preLGM (25-30)	KNR73 4PC	Keigwin and Lehman (2015)	2.87517	Time-series flag	1	1	0
4.002	-114.187	3806	19189	85	S	16650	65	18100	110	1450	128	15934	2180	130.5	2034	3	96	LGM (19-21.8)	KNR73 6PG	Keigwin and Lehman (2015)	1.90213	Low sed rate <2cm/kyr *	0	1	0
0.022	-86.463	2941	17721	98	S	15300	70	16950	80	1650	106	14465	2462	103.25	2030	4	97		ME0005-24JC	Keigwin and Lehman (2015)	16.3648		1	1	1
0.022	-86.463	2941	21327	144	S	18400	95	20400	170	2000	195	17588	2763	198.25	2030	4	97	LGM (19-21.8)	ME0005-24JC	Keigwin and Lehman (2015)	16.5049		1	1	1
-3.338	-102.453	3253	16272	91	S	14150	70	17100	81.3941	2950	107	13492	3603.06	109.75	1992	4	98	HS1 (15-17.5)	PLDS 7G	Keigwin and Lehman (2015)	2.27384		1	1	0
-3.338	-102.453	3253	18932	129	S	16425	120	19400	106.066	2975	160	15696	3718.34	187.25	1992	4	98	LGM (19-21.8)	PLDS 7G	Keigwin and Lehman (2015)	2.21847		1	1	0
-3.338	-102.453	3253	20436	141	S	17675	120	20500	113.137	2825	165	16889	3590.63	175.25	1992	4	98	LGM (19-21.8)	PLDS 7G	Keigwin and Lehman (2015)	2.3488		1	1	0
51.073	168.975	3225	13963	66	S	13100	50	14250	55	1150	74	12001	2204	84	2058	3	99	BA (12.8-14.8)	RNDB PC11	Keigwin and Lehman (2015)	4.65516		1	1	0
49.725	168.312	2329	10714	64	S	10450	40	12000	50	1550	64	9481	2521	79.75	2033	3	100	EHOL (7-11)	RNDB PC13	Keigwin and Lehman (2015)	1.21337	Low sed rate <2cm/kyr *	0	1	0
49.725	168.312	2329	13846	89	S	13000	70	15650	95	2650	118	12012	3659	127.75	2033	3	100	BA (12.8-14.8)	RNDB PC13	Keigwin and Lehman (2015)	5.09172		1	1	0
49.725	168.312	2329	13902	61	S	13050	50	14900	75	1850	90	12066	2868	88.25	2033	3	100	BA (12.8-14.8)	RNDB PC13	Keigwin and Lehman (2015)	5.17911		1	1	0
-1.608	162.558	4250	13329	203	S	12000	190	18750	90	6750	210	11476	7286	240	1870	3	101	BA (12.8-14.8)	S67 FFC15	Keigwin and Lehman (2015)	1.27541	Apparent flyer, extremely high age, Low sed rate <2cm/kyr	0	0	0
-1.608	162.558	4250	25185	228	S	21800	210	25600	170	3800	270	20885	4702	256	1870	3	101	preLGM (25-30)	S67 FFC15	Keigwin and Lehman (2015)	0.992654	Low sed rate <2cm/kyr *	0	1	0
-4.507	-102.015	3410	16303	70	S	14175	55	18400	100	4225	114	13519	4878	117.5	1992	4	102	HS1 (15-17.5)	VNTR01-10GGC	Keigwin and Lehman (2015)	2.08551	Time-series flag	1	1	0
-4.507	-102.015	3410	25617	88	S	22200	90	25000	91.9239	2800	129	21174	3805.76	138.5	1992	4	102	preLGM (25-30)	VNTR01-10GGC	Keigwin and Lehman (2015)	1.79568	Low sed rate <2cm/kyr *	0	1	0
31.6667	-75.4167	2975	1364	39	S	1980	35	2125	35	145	49	1493	634	69.5	759	1	103	HOL (<6)	KNR140 GGC39	Keigwin and Schlegel (2002)	5.13196		1	1	0
31.6667	-75.4167	2975	6907	49	S	6620	40	7050	45	430	60	6062.4	996	62.75	759	1	103		KNR140 GGC39	Keigwin and Schlegel (2002)	9.12118		1	1	0
31.6667	-75.4167	2975	12696	35	S	11350	50	12300	65	950	82	10652	1641	104	759	1	103	YD (11.8-12.7)	KNR140 GGC39	Keigwin and Schlegel (2002)	10.0032		1	1	1
31.6667	-75.4167	2975	19487	94	S	16900	75	18150	100	1250	125	16120	2015	151	759	1	103	LGM (19-21.8)	KNR140 GGC39	Keigwin and Schlegel (2002)	22.0147		1	1	1
31.6902	-75.43	2972	18209	94	S	15750	80	16550	95	800	124	14856	1668	188.25	759	1	104		KNR140 JPC37	Keigwin and Schlegel (2002)	17.2991		1	1	1
31.6902	-75.43	2972	21121	120	S	18250	95	19300	120	1050	153	17536	1775	146	759	1	104	LGM (19-21.8)	KNR140 JPC37	Keigwin and Schlegel (2002)	19.2699		1	1	1
31.6902	-75.43	2972	24537	155	S	21250	120	22400	150	1150	192	20386	1982	185.25	759	1	104		KNR140 JPC37	Keigwin and Schlegel (2002)	21.3147		1	1	1
31.6902	-75.43	2972	27272.5	215	S	23900	250	24900	180	1000	308	22986	1906	335.75	759	1	104	preLGM (25-30)	KNR140 JPC37	Keigwin and Schlegel (2002)	22.5502		1	1	1
29.07	-72.9	4250	17252	94	S	14950	80	16500	55	1550	97	14148	2327	107	849	1	105	HS1 (15-17.5)	KNR140 JPC12	Keigwin and Swift (2017)	11.303		1	1	1
29.07	-72.9	4250	18964.5	142	S	16450	130	17900	110	1450	170	15731	2183	195.5	849	1	105	LGM (19-21.8)	KNR140 JPC12	Keigwin and Swift (2017)	13.6571		1	1	1
36.1202	-72.292	3927	19431	69	S	16850	60	18500	75	1650	96	16059	2431	106.5	810	1	106	LGM (19-21.8)	KNR178 GGC2	Keigwin and Swift (2017)	8.44012		1	1	0
36.1202	-72.292	3927	20239	81	S	17500	70	18750	75	1250	103	16727	2019	103.75	810	1	106	LGM (19-21.8)	KNR178 GGC2	Keigwin and Swift (2017)	9.289		1	1	0
36.1202	-72.292	3927	20352	65	S	17600	60	18650	75	1050	96	16819	1829	100	810	1	106	LGM (19-21.8)	KNR178 GGC2	Keigwin and Swift (2017)	10.4167		1	1	1
36.1202	-72.292	3927	21256	95	S	18350	70	19550	70	1200	99	17576	1969	97	810	1	106	LGM (19-21.8)	KNR178 GGC2	Keigwin and Swift (2017)	10.7264		1	1	1
43.4645	-54.7557	3870	17717	125	S	15300	95	17050	70	1750	118	14464	2559	104.5	739	1	107		KNR197-10 CDH42	Keigwin and Swift (2017)	32.7651		1	1	1
43.4645	-54.7557	3870	18319	90	S	15850	75	17300	65	1450	99	15178	2154	159	739	1	107		KNR197-10 CDH42	Keigwin and Swift (2017)	36.4922		1	1	1
43.4645	-54.7557	3870	19551	127	S	16950	100	18050	65	1100	119	16215	1829	140.75	739	1	107	LGM (19-21.8)	KNR197-10 CDH42	Keigwin and Swift (2017)	42.0183		1	1	1
43.4645	-54.7557	3870	19934	81	S	17250	65	18550	90	1300	111	16529	2037	120.75	739	1	107	LGM (19-21.8)	KNR197-10 CDH42	Keigwin and Swift (2017)	41.7628		1	1	1
43.4645	-54.7557	3870	21407	217	S	18450	160	19800	85	1350	181	17696	2107	154	739	1	107	LGM (19-21.8)	KNR197-10 CDH42	Keigwin and Swift (2017)	42.0657		1	1	1
36.405	-48.5398	5011	14915	85	S	13100	60	14400	75	1300	96	12516	1875	105.25	886	1	108	HS1 (15-17.5)	KNR197-10 GGC17	Keigwin and Swift (2017)	9.98994		1	1	1
36.405	-48.5398	5011	20460	43	S	17700	40	18900	120	1200	126	16917	1976	135.5	886	1	108	LGM (19-21.8)	KNR197-10 GGC17	Keigwin and Swift (2017)	8.89541		1	1	0
33.6867	-57.615	4583	12421.5	375	S	11150	310	11800	190	650	364	10344	1319	348.75	934	1	109	YD (11.8-12.7)	KNR31 GPC5	Keigwin et al. (1991)	16.1011		1	1	1
43.07	-55.83	3525	13844	90	S	12450	70	12950	55	500	89	12011	953	101	739	1	110	BA (12.8-14.8)	OCE326 GGC14	Keigwin et al. (2005); Robinson et al. (2005)	17.0471		1	1	1
43.07	-55.83	3525	14106	89	S	12650	60	12800	55	150	81	12236	581	110	739	1	110	BA (12.8-14.8)	OCE326 GGC14	Keigwin et al. (2005); Robinson et al. (2005)	20.2042		1	1	1
43.07	-55.83	3525	14257	98	S	12750	55	13400	70	650	89	12324	1074	96	739	1	110	BA (12.8-14.8)	OCE326 GGC14	Keigwin et al. (2005); Robinson et al. (2005)	17.9561		1	1	1
43.07	-55.83	3525	15557	101	S	13600	75	14900	70	1300	103	12975	1914	104.75	739	1	110	HS1 (15-17.5)	OCE326 GGC14	Keigwin et al. (2005); Robinson et al. (2005)	23.2693		1	1	1
34.28	-120.03	576.5	1007	60	TS	1850	60	2430	50	580	78	1135	1314	83.75	1430	3	111	HOL (<6)	ODP893A	Kennett and Ingram (1995)	153.923	Time-series flag	1	1	1
34.28	-120.03	576.5	1721	86	TS	2520	70	3000	60	480	92	1834	1177	97	1430	3	111	HOL (<6)	ODP893A	Kennett and Ingram (1995)	210.924	Time-series flag	1	1	1
34.28	-120.03	576.5	2988	89	TS	3555	70	4130	80	575	106	2865	1259	103	1430	3	111	HOL (<6)	ODP893A	Kennett and Ingram (1995)	189.759	Time-series flag	1	1	1
34.28	-120.03	576.5	4577	73	TS	4800	50	5210	50	410	71	4104	1113	74.25	1430	3	111	HOL (<6)	ODP893A	Kennett and Ingram (1995)	153.813	Time-series flag	1	1	1
34.28	-120.03	576.5	6197	77	TS	6200	70	6570	150	370	166	5377.2	1189	168.75	1430	3	111		ODP893A	Kennett and Ingram (1995)	140.552	Time-series flag	1	1	1
34.28	-120.03	576.5	8294	99	TS	8235	90	8570	70	335	114	7436	1102	132.5	1430	3	111	EHOL (7-11)	ODP893A	Kennett and Ingram (1995)	141.91	Time-series flag	1	1	1
34.28	-120.03	576.5	9362	184	TS	9100	150	9230	150	130	212	8316	876	233	1430	3	111	EHOL (7-11)	ODP893A	Kennett and Ingram (1995)	148.579	Time-series flag	1	1	1
34.28	-120.03	576.5	10647	130	TS	10080	80	10860	110	780	136	9395	1436	151	1430	3	111	EHOL (7-11)	ODP893A	Kennett and Ingram (1995)	173.1	Time-series flag	1	1	1
34.28	-120.03	576.5	10855	126	TS	10210	90	10670	110	460	142	9573	1107	129.25	1430	3	111	EHOL (7-11)	ODP893A	Kennett and Ingram (1995)	173.468	Time-series flag	1	1	1
34.28	-120.03	576.5	10925	101	TS	10260	70	10630	70	370	99	9616	1044	83.25	1430	3	111	EHOL (7-11)	ODP893A	Kennett and Ingram (1995)	175.286	Time-series flag	1	1	1
34.28	-120.03	576.5	12913	230	TS	11810	240	12020	100	210	260	11020	1015	287.75	1430	3	111		ODP893A	Kennett and Ingram (1995)	176.256	Time-series flag	1	1	1
34.28	-120.03	576.5	13430	74	TS	12340	70	12760	80	420	106	11541	1199	120	1430	3	111	BA (12.8-14.8)	ODP893A	Kennett and Ingram (1995)	180.045	Time-series flag	1	1	1
34.28	-120.03	576.5	14331	265	TS	12990	170	13520	90	530	192	12378	1170	173.5	1430	3	111	BA (12.8-14.8)	ODP893A	Kennett and Ingram (1995)	183.937	Time-series flag	1	1	1
34.28	-120.03	576.5	16412	170	TS	14490	130	14980	160	490	206	13609	1381	196.75	1430	3	111	HS1 (15-17.5)	ODP893A	Kennett and Ingram (1995)	169.388	Time-series flag	1	1	1
34.28	-120.03	576.5	17099	291	TS	15040	230	15370	450	330	505	14114	1297	494.75	1430	3	111	HS1 (15-17.5)	ODP893A	Kennett and Ingram (1995)	171.823	Time-series flag	1	1	1
34.28	-120.03	576.5	17725	172	TS	15550	140	16080	220	530	261	14467	1572	240.75	1430	3	111		ODP893A	Kennett and Ingram (1995)	176.869	Time-series flag	1	1	1
34.28	-120.03	576.5	18917	212	TS	16630	190	17120	90	490	210	15677	1451	246.75	1430	3	111	LGM (19-21.8)	ODP893A	Kennett and Ingram (1995)	174.393	Time-series flag	1	1	1
34.28	-120.03	576.5	19607	176	TS	17220	140	17510	100	290	172	16324	1232	180.75	1430	3	111	LGM (19-21.8)	ODP893A	Kennett and Ingram (1995)	173.713	Time-series flag	1	1	1
34.28	-120.03	576.5	28647	270	TS	25530	260	26080	320	550	412	24346	1680	408.5	1430	3	111	preLGM (25-30)	ODP893A	Kennett and Ingram (1995)	159.912	Time-series flag	1	1	1
58.97	-9.61	150	3672	200	C	3740	55	NaN	NaN	NaN	NaN	3395	311	169.75	456	1	112	HOL (<6)	DAPC2	Knutz et al., 2007	5.74919		1	1	0
58.97	-9.61	150	9238	200	C	8590	90	NaN	NaN	NaN	NaN	8224.8	331	148	456	1	112	EHOL (7-11)	DAPC2	Knutz et al., 2007	13.8719		1	1	1
58.97	-9.61	150	11833.2	200	C	10830	90	NaN	NaN	NaN	NaN	10199	648	139.75	456	1	112	YD (11.8-12.7)	DAPC2	Knutz et al., 2007	19.402		1	1	1
58.97	-9.61	150	12760.9	200	C	11380	110	NaN	NaN	NaN	NaN	10876	550	249.25	456	1	112		DAPC2	Knutz et al., 2007	16.041		1	1	1
58.97	-9.61	150	15379.2	200	C	13410	130	NaN	NaN	NaN	NaN	12896	532	193	456	1	112	HS1 (15-17.5)	DAPC2	Knutz et al., 2007	25.569		1	1	1
58.97	-9.61	150	16005	200	C	14400	110	NaN	NaN	NaN	NaN	13313	1084	178.75	456	1	112	HS1 (15-17.5)	DAPC2	Knutz et al., 2007	41.917		1	1	1
58.97	-9.61	150	16148.1	200	C	14900	110	NaN	NaN	NaN	NaN	13403	1487	177.5	456	1	112	HS1 (15-17.5)	DAPC2	Knutz et al., 2007	41.9357		1	1	1
58.97	-9.61	150	16410.4	200	C	15330	100	NaN	NaN	NaN	NaN	13608	1730	167.25	456	1	112	HS1 (15-17.5)	DAPC2	Knutz et al., 2007	46.0117		1	1	1
58.97	-9.61	150	16562.5	200	C	15390	130	NaN	NaN	NaN	NaN	13696	1692	182	456	1	112	HS1 (15-17.5)	DAPC2	Knutz et al., 2007	48.4441		1	1	1
58.97	-9.61	150	16996	200	C	15400	170	NaN	NaN	NaN	NaN	13943	1421	230.25	456	1	112	HS1 (15-17.5)	DAPC2	Knutz et al., 2007	62.8373		1	1	1
58.97	-9.61	150	17155.2	200	C	15560	140	NaN	NaN	NaN	NaN	14158	1446	219.25	456	1	112	HS1 (15-17.5)	DAPC2	Knutz et al., 2007	67.981		1	1	1
58.97	-9.61	150	18037.8	200	C	16430	130	NaN	NaN	NaN	NaN	14699	1719	245.5	456	1	112		DAPC2	Knutz et al., 2007	55.5185		1	1	1
58.97	-9.61	150	19532.8	200	C	17310	130	NaN	NaN	NaN	NaN	16184	1113	211.75	456	1	112	LGM (19-21.8)	DAPC2	Knutz et al., 2007	54.3206		1	1	1
58.97	-9.61	150	20177.1	200	C	17870	130	NaN	NaN	NaN	NaN	16682	1179	210	456	1	112	LGM (19-21.8)	DAPC2	Knutz et al., 2007	41.8288		1	1	1
58.97	-9.61	150	22424.3	200	C	19730	140	NaN	NaN	NaN	NaN	18535	1196	252.5	456	1	112		DAPC2	Knutz et al., 2007	41.8244		1	1	1
58.97	-9.61	150	22974.3	200	C	20280	150	NaN	NaN	NaN	NaN	19043	1226	259.75	456	1	112		DAPC2	Knutz et al., 2007	43.3722		1	1	1
58.97	-9.61	150	23320.1	200	C	20450	170	NaN	NaN	NaN	NaN	19396	1050	238.75	456	1	112		DAPC2	Knutz et al., 2007	27.8962		1	1	1
58.97	-9.61	150	23929.5	200	C	21410	200	NaN	NaN	NaN	NaN	19988	1476	310.25	456	1	112		DAPC2	Knutz et al., 2007	23.9499		1	1	1
58.97	-9.61	150	25015.1	200	C	21860	190	NaN	NaN	NaN	NaN	20720	1123	255.25	456	1	112	preLGM (25-30)	DAPC2	Knutz et al., 2007	22.1659		1	1	1
58.97	-9.61	150	25646.7	200	C	23660	210	NaN	NaN	NaN	NaN	21214	2391	318.25	456	1	112	preLGM (25-30)	DAPC2	Knutz et al., 2007	19.2365		1	1	1
58.97	-9.61	150	26270.5	200	C	23950	220	NaN	NaN	NaN	NaN	21981	1891	317.25	456	1	112	preLGM (25-30)	DAPC2	Knutz et al., 2007	22.3825		1	1	1
-54.8095	-62.167	816	11879	31.5	C	NaN	NaN	11050	70	NaN	NaN	10208	840	74	1168	8	113	YD (11.8-12.7)	NBP0805-TB04-Dn-E-003	Li et al. (2020)	NaN		1	1	1
-59.7637	-68.9333	981	14478	63.5	C	NaN	NaN	13322	74	NaN	NaN	12413	904	79.75	1198	8	113	BA (12.8-14.8)	NBP1103- DH117-cc(f)-7	Li et al. (2020)	NaN		1	1	1
-54.8095	-62.167	334	13392	136.5	C	NaN	NaN	12722	70	NaN	NaN	11511	1196	167.25	1034	8	113	BA (12.8-14.8)	NBP1103-DH07-Bc-08	Li et al. (2020)	NaN		1	1	1
-54.8095	-62.167	334	13727	89	C	NaN	NaN	12914	72	NaN	NaN	11801	1052	117.75	1034	8	113	BA (12.8-14.8)	NBP1103-DH07-Bc-1	Li et al. (2020)	NaN		1	1	1
-54.8095	-62.167	334	14371	94	C	NaN	NaN	13188	42	NaN	NaN	12398	803	64.25	1034	8	113	BA (12.8-14.8)	NBP1103-DH07-Bc-10	Li et al. (2020)	NaN		1	1	1
-54.8095	-62.167	334	14130	46	C	NaN	NaN	13127	76	NaN	NaN	12252	880	91.5	1034	8	113	BA (12.8-14.8)	NBP1103-DH07-Bc-12	Li et al. (2020)	NaN		1	1	1
-54.8095	-62.167	334	14015	146.5	C	NaN	NaN	13084	72	NaN	NaN	12055	977	147	1034	8	113	BA (12.8-14.8)	NBP1103-DH07-Bc-16	Li et al. (2020)	NaN		1	1	1
-54.8095	-62.167	334	13870	40	C	NaN	NaN	12963	74	NaN	NaN	12040	929	83.25	1034	8	113	BA (12.8-14.8)	NBP1103-DH07-Bc-3	Li et al. (2020)	NaN		1	1	1
-54.8095	-62.167	334	14407	46	C	NaN	NaN	13227	76	NaN	NaN	12396	828	79.5	1034	8	113	BA (12.8-14.8)	NBP1103-DH07-Bc-6	Li et al. (2020)	NaN		1	1	1
-54.8095	-62.167	334	14582	41	C	NaN	NaN	13247	76	NaN	NaN	12459	789	81	1034	8	113	BA (12.8-14.8)	NBP1103-DH07-Bc-7	Li et al. (2020)	NaN		1	1	1
-54.8095	-62.167	334	14052	38	C	NaN	NaN	13093	82	NaN	NaN	12134	957	108.25	1034	8	113	BA (12.8-14.8)	NBP1103-DH07-Bn-2	Li et al. (2020)	NaN		1	1	1
-54.8095	-62.167	334	13625	113	C	NaN	NaN	12625	71	NaN	NaN	11840	840	140.25	1034	8	113	BA (12.8-14.8)	NBP1103-DH07-Bn-21	Li et al. (2020)	NaN		1	1	1
-59.7637	-68.9333	1662	10227	77	C	NaN	NaN	9864	60	NaN	NaN	9047.2	795	120	1290	8	113	EHOL (7-11)	NBP1103-DH112-Dc-1	Li et al. (2020)	NaN		1	1	1
-59.7637	-68.9333	1672	14826	56.5	C	NaN	NaN	14062	80	NaN	NaN	12458	1608	100.25	1290	8	113	BA (12.8-14.8)	NBP1103-DH113-Dc-1	Li et al. (2020)	NaN		1	1	1
-59.7637	-68.9333	843	15407	92	C	NaN	NaN	13767	76	NaN	NaN	12904	867	100.25	1198	8	113	HS1 (15-17.5)	NBP1103-DH115-cc-2	Li et al. (2020)	NaN		1	1	1
-59.7637	-68.9333	843	15200	61.5	C	NaN	NaN	13867	75	NaN	NaN	12744	1121	97	1198	8	113	HS1 (15-17.5)	NBP1103-DH115-Dc(f)-10	Li et al. (2020)	NaN		1	1	1
-59.7637	-68.9333	981	14888	217.5	C	NaN	NaN	13237	74	NaN	NaN	12506	713	147	1198	8	113		NBP1103-DH117-cc-16	Li et al. (2020)	NaN		1	1	1
-59.7637	-68.9333	981	14891	102.5	C	NaN	NaN	13499	74	NaN	NaN	12507	990	110.25	1198	8	113	BA (12.8-14.8)	NBP1103-DH117-cc-171	Li et al. (2020)	NaN		1	1	1
-59.7637	-68.9333	981	14775	98	C	NaN	NaN	13409	74	NaN	NaN	12375	960	97.75	1198	8	113	BA (12.8-14.8)	NBP1103-DH117-cc-175	Li et al. (2020)	NaN		1	1	1
-59.7637	-68.9333	981	14591	66	C	NaN	NaN	13384	74	NaN	NaN	12463	930	81.5	1198	8	113	BA (12.8-14.8)	NBP1103-DH117-cc-177	Li et al. (2020)	NaN		1	1	1
-59.7637	-68.9333	981	14896	83.5	C	NaN	NaN	13566	74	NaN	NaN	12508	1055	104	1198	8	113		NBP1103-DH117-cc-242	Li et al. (2020)	NaN		1	1	1
-59.7637	-68.9333	981	14701	67	C	NaN	NaN	13519	76	NaN	NaN	12443	1081	92.75	1198	8	113	BA (12.8-14.8)	NBP1103-DH117-Cc-249	Li et al. (2020)	NaN		1	1	1
-59.7637	-68.9333	981	15161	171.5	C	NaN	NaN	13433	76	NaN	NaN	12716	716	150.5	1198	8	113	HS1 (15-17.5)	NBP1103-DH117-cc-75	Li et al. (2020)	NaN		1	1	1
-59.7637	-68.9333	981	19400	337.5	C	NaN	NaN	17499	96	NaN	NaN	16032	1428	307.5	1198	8	113	LGM (19-21.8)	NBP1103-DH117-cc(f)-6	Li et al. (2020)	NaN		1	1	1
-59.7637	-68.9333	981	14316	90	C	NaN	NaN	13109	74	NaN	NaN	12360	750	90	1198	8	113	BA (12.8-14.8)	NBP1103-DH117-Dc-1	Li et al. (2020)	NaN		1	1	1
-59.7637	-68.9333	981	12030	46.5	C	NaN	NaN	11165	64	NaN	NaN	10312	847	70	1198	8	113	YD (11.8-12.7)	NBP1103-DH117-Dc-12	Li et al. (2020)	NaN		1	1	1
-59.7637	-68.9333	981	14746	56.5	C	NaN	NaN	13525	73	NaN	NaN	12368	1107	91.5	1198	8	113	BA (12.8-14.8)	NBP1103-DH117-Dc-14	Li et al. (2020)	NaN		1	1	1
-59.7637	-68.9333	981	15579	81.5	C	NaN	NaN	14203	76	NaN	NaN	12993	1203	103	1198	8	113	HS1 (15-17.5)	NBP1103-DH117-Dc-16	Li et al. (2020)	NaN		1	1	1
-59.7637	-68.9333	981	15043	50.5	C	NaN	NaN	13627	74	NaN	NaN	12623	1004	89	1198	8	113	HS1 (15-17.5)	NBP1103-DH117-Dc-18	Li et al. (2020)	NaN		1	1	1
-59.7637	-68.9333	981	14304	49	C	NaN	NaN	13219	72	NaN	NaN	12346	864	84	1198	8	113	BA (12.8-14.8)	NBP1103-DH117-Dc-21	Li et al. (2020)	NaN		1	1	1
-59.7637	-68.9333	981	15940	120	C	NaN	NaN	14436	76	NaN	NaN	13262	1164	115.25	1198	8	113	HS1 (15-17.5)	NBP1103-DH117-Dc-22	Li et al. (2020)	NaN		1	1	1
-59.7637	-68.9333	981	15238	79.5	C	NaN	NaN	13958	74	NaN	NaN	12773	1179	104.75	1198	8	113	HS1 (15-17.5)	NBP1103-DH117-Dc-23	Li et al. (2020)	NaN		1	1	1
-59.7637	-68.9333	981	14982	85.5	C	NaN	NaN	13582	72	NaN	NaN	12577	1006	102	1198	8	113	HS1 (15-17.5)	NBP1103-DH117-Dc-24	Li et al. (2020)	NaN		1	1	1
-59.7637	-68.9333	981	11618	53	C	NaN	NaN	11013	64	NaN	NaN	10058	961	71.25	1198	8	113		NBP1103-DH117-Dc-3	Li et al. (2020)	NaN		1	1	1
-59.7637	-68.9333	981	15311	61	C	NaN	NaN	13915	76	NaN	NaN	12847	1072	97.25	1198	8	113	HS1 (15-17.5)	NBP1103-DH117-Dc-32	Li et al. (2020)	NaN		1	1	1
-59.7637	-68.9333	981	14911	62	C	NaN	NaN	13514	74	NaN	NaN	12514	993	93.75	1198	8	113		NBP1103-DH117-Dc-35	Li et al. (2020)	NaN		1	1	1
-59.7637	-68.9333	981	15138	81.5	C	NaN	NaN	13486	74	NaN	NaN	12695	790	103.75	1198	8	113	HS1 (15-17.5)	NBP1103-DH117-Dc-5	Li et al. (2020)	NaN		1	1	1
-59.7637	-68.9333	981	15067	96.5	C	NaN	NaN	13769	74	NaN	NaN	12634	1128	109.5	1198	8	113	HS1 (15-17.5)	NBP1103-DH117-Dc-8	Li et al. (2020)	NaN		1	1	1
-59.7637	-68.9333	981	11794	53.5	C	NaN	NaN	10746	71	NaN	NaN	10121	598	83.5	1198	8	113	YD (11.8-12.7)	NBP1103-DH117-Dc(f)-16	Li et al. (2020)	NaN		1	1	1
-59.7637	-68.9333	981	13976	57	C	NaN	NaN	13000	82	NaN	NaN	12005	952	101.75	1198	8	113	BA (12.8-14.8)	NBP1103-DH117-Dc(f)-22	Li et al. (2020)	NaN		1	1	1
-59.7637	-68.9333	981	15863	71	C	NaN	NaN	14398	73	NaN	NaN	13224	1177	93.5	1198	8	113	HS1 (15-17.5)	NBP1103-DH117-Dc(f)-23	Li et al. (2020)	NaN		1	1	1
-59.7637	-68.9333	981	12460	82.5	C	NaN	NaN	11387	64	NaN	NaN	10396	955	96.25	1198	8	113	YD (11.8-12.7)	NBP1103-DH117-Dc(f)-37	Li et al. (2020)	NaN		1	1	1
-59.7637	-68.9333	981	11697	49.5	C	NaN	NaN	10900	72	NaN	NaN	10081	813	79.25	1198	8	113		NBP1103-DH117-Dc(f)-7	Li et al. (2020)	NaN		1	1	1
-59.7637	-68.9333	981	16142	190.5	C	NaN	NaN	14605	80	NaN	NaN	13399	1197	156	1198	8	113	HS1 (15-17.5)	NBP1103-DH117-Dc(f)-9	Li et al. (2020)	NaN		1	1	1
-59.7637	-68.9333	981	12539	77	C	NaN	NaN	11300	68	NaN	NaN	10516	798	103	1198	8	113	YD (11.8-12.7)	NBP1103-DH117-Dn-1	Li et al. (2020)	NaN		1	1	1
-59.7637	-68.9333	981	14227	61	C	NaN	NaN	13187	72	NaN	NaN	12315	876	84	1198	8	113	BA (12.8-14.8)	NBP1103-DH117-Dn-10	Li et al. (2020)	NaN		1	1	1
-59.7637	-68.9333	981	14813	81	C	NaN	NaN	13898	74	NaN	NaN	12437	1444	99	1198	8	113	BA (12.8-14.8)	NBP1103-DH117-Dn-12	Li et al. (2020)	NaN		1	1	1
-59.7637	-68.9333	981	10271	29	C	NaN	NaN	9996	62	NaN	NaN	9173.2	831	80.75	1198	8	113	EHOL (7-11)	NBP1103-DH117-Dn-2	Li et al. (2020)	NaN		1	1	1
-59.7637	-68.9333	1701	12831	66.5	C	NaN	NaN	11384	67	NaN	NaN	10933	444	116.25	1326	8	113	BA (12.8-14.8)	NBP1103-DH120-Dc-10	Li et al. (2020)	NaN		1	1	1
-59.7637	-68.9333	1701	12831	66.5	C	NaN	NaN	11647	68	NaN	NaN	10933	707	116.75	1326	8	113	BA (12.8-14.8)	NBP1103-DH120-Dc-10	Li et al. (2020)	NaN		1	1	1
-59.7637	-68.9333	1701	15107	59.5	C	NaN	NaN	14062	38	NaN	NaN	12664	1392	69	1326	8	113	HS1 (15-17.5)	NBP1103-DH120-Dc-11	Li et al. (2020)	NaN		1	1	1
-59.7637	-68.9333	1701	14791	72.5	C	NaN	NaN	13974	80	NaN	NaN	12399	1535	100.75	1326	8	113	BA (12.8-14.8)	NBP1103-DH120-Dc-14	Li et al. (2020)	NaN		1	1	1
-59.7637	-68.9333	1701	14740	65	C	NaN	NaN	13758	78	NaN	NaN	12375	1332	95.75	1326	8	113	BA (12.8-14.8)	NBP1103-DH120-Dc-15	Li et al. (2020)	NaN		1	1	1
-59.7637	-68.9333	1701	10375	68	C	NaN	NaN	9984	64	NaN	NaN	9213	764	79.5	1326	8	113	EHOL (7-11)	NBP1103-DH120-Dc-19	Li et al. (2020)	NaN		1	1	1
-59.7637	-68.9333	1701	15264	77.5	C	NaN	NaN	14298	80	NaN	NaN	12797	1497	107.5	1326	8	113	HS1 (15-17.5)	NBP1103-DH120-Dc-2	Li et al. (2020)	NaN		1	1	1
-59.7637	-68.9333	1701	16310	222	C	NaN	NaN	13750	74	NaN	NaN	13525	221	167.25	1326	8	113	HS1 (15-17.5)	NBP1103-DH120-Dc-20	Li et al. (2020)	NaN		1	1	1
-59.7637	-68.9333	1701	16310	222	C	NaN	NaN	14012	76	NaN	NaN	13525	483	168	1326	8	113	HS1 (15-17.5)	NBP1103-DH120-Dc-20	Li et al. (2020)	NaN		1	1	1
-59.7637	-68.9333	1701	15106	67	C	NaN	NaN	14170	80	NaN	NaN	12663	1500	100.5	1326	8	113	HS1 (15-17.5)	NBP1103-DH120-Dc-23	Li et al. (2020)	NaN		1	1	1
-59.7637	-68.9333	1701	15328	96	C	NaN	NaN	14405	73	NaN	NaN	12864	1553	105.25	1326	8	113	HS1 (15-17.5)	NBP1103-DH120-Dc-27	Li et al. (2020)	NaN		1	1	1
-59.7637	-68.9333	1701	12805	95.5	C	NaN	NaN	11670	74	NaN	NaN	10905	760	154	1326	8	113	BA (12.8-14.8)	NBP1103-DH120-Dc-29	Li et al. (2020)	NaN		1	1	1
-59.7637	-68.9333	1701	15484	70.5	C	NaN	NaN	14397	82	NaN	NaN	12929	1460	98	1326	8	113	HS1 (15-17.5)	NBP1103-DH120-Dc-3	Li et al. (2020)	NaN		1	1	1
-59.7637	-68.9333	1701	14980	57.5	C	NaN	NaN	14161	80	NaN	NaN	12575	1587	96.5	1326	8	113	HS1 (15-17.5)	NBP1103-DH120-Dc-5	Li et al. (2020)	NaN		1	1	1
-59.7637	-68.9333	1701	12001	83.5	C	NaN	NaN	11297	68	NaN	NaN	10309	1000	86.5	1326	8	113	YD (11.8-12.7)	NBP1103-DH120-Dc-57	Li et al. (2020)	NaN		1	1	1
-59.7637	-68.9333	1701	12064	79	C	NaN	NaN	11127	63	NaN	NaN	10341	796	75.75	1326	8	113	YD (11.8-12.7)	NBP1103-DH120-Dc-60	Li et al. (2020)	NaN		1	1	1
-59.7637	-68.9333	1701	15199	62	C	NaN	NaN	14203	82	NaN	NaN	12743	1458	102.25	1326	8	113	HS1 (15-17.5)	NBP1103-DH120-Dc-66	Li et al. (2020)	NaN		1	1	1
-59.7637	-68.9333	1701	12099	82	C	NaN	NaN	11251	64	NaN	NaN	10345	906	74.5	1326	8	113	YD (11.8-12.7)	NBP1103-DH120-Dc-8	Li et al. (2020)	NaN		1	1	1
-59.7637	-68.9333	1701	12798	124.5	C	NaN	NaN	11452	67	NaN	NaN	10910	549	170.75	1326	8	113		NBP1103-DH120-Dc-9	Li et al. (2020)	NaN		1	1	1
-59.7637	-68.9333	1701	11152	120	C	NaN	NaN	10181	69	NaN	NaN	9662.8	486	143.25	1326	8	113		NBP1103-DH120-Dc(f)-5	Li et al. (2020)	NaN		1	1	1
-59.7637	-68.9333	1701	12648	40	C	NaN	NaN	11797	69	NaN	NaN	10586	1205	92	1326	8	113	YD (11.8-12.7)	NBP1103-DH120-Dc(f)-7	Li et al. (2020)	NaN		1	1	1
-59.7637	-68.9333	1701	12302	48.5	C	NaN	NaN	11516	68	NaN	NaN	10387	1127	72.25	1326	8	113	YD (11.8-12.7)	NBP1103-DH120-Dc(f)-9	Li et al. (2020)	NaN		1	1	1
-57	-67	1012	16032	116	C	NaN	NaN	14064	80	NaN	NaN	13337	731	114.5	1215	8	113	HS1 (15-17.5)	NBP1103-DH134-Bc-214	Li et al. (2020)	NaN		1	1	1
-57	-67	1012	15044	79	C	NaN	NaN	13486	78	NaN	NaN	12624	863	103.25	1215	8	113	HS1 (15-17.5)	NBP1103-DH134-Bc-227	Li et al. (2020)	NaN		1	1	1
-57	-67	1012	15636	46.5	C	NaN	NaN	14000	80	NaN	NaN	13045	955	94.75	1215	8	113	HS1 (15-17.5)	NBP1103-DH134-Bc-233	Li et al. (2020)	NaN		1	1	1
-57	-67	1012	15802	100.5	C	NaN	NaN	14086	74	NaN	NaN	13180	909	109	1215	8	113	HS1 (15-17.5)	NBP1103-DH134-Bc-234	Li et al. (2020)	NaN		1	1	1
-57	-67	1012	15644	80.5	C	NaN	NaN	14018	80	NaN	NaN	13052	966	108	1215	8	113	HS1 (15-17.5)	NBP1103-DH134-Bc-239	Li et al. (2020)	NaN		1	1	1
-57	-67	1012	14877	114.5	C	NaN	NaN	13266	72	NaN	NaN	12503	764	111.5	1215	8	113	BA (12.8-14.8)	NBP1103-DH134-Bc-437	Li et al. (2020)	NaN		1	1	1
-57	-67	1012	15544	63	C	NaN	NaN	13859	74	NaN	NaN	12965	887	93.75	1215	8	113	HS1 (15-17.5)	NBP1103-DH134-Bc-443	Li et al. (2020)	NaN		1	1	1
-57	-67	1012	15203	98.5	C	NaN	NaN	13444	85	NaN	NaN	12746	694	120.5	1215	8	113	HS1 (15-17.5)	NBP1103-DH134-Bc-686	Li et al. (2020)	NaN		1	1	1
-57	-67	1012	15313	110	C	NaN	NaN	13994	75	NaN	NaN	12849	1155	113.5	1215	8	113	HS1 (15-17.5)	NBP1103-DH134-Cc-10	Li et al. (2020)	NaN		1	1	1
-57	-67	1012	12310	71	C	NaN	NaN	11285	68	NaN	NaN	10365	899	73.5	1215	8	113	YD (11.8-12.7)	NBP1103-DH134-Fc-135	Li et al. (2020)	NaN		1	1	1
-57	-67	1012	12420	87	C	NaN	NaN	11260	68	NaN	NaN	10341	853	95	1215	8	113	YD (11.8-12.7)	NBP1103-DH134-Fc-136	Li et al. (2020)	NaN		1	1	1
-57	-67	1012	14165	80	C	NaN	NaN	13238	76	NaN	NaN	12274	968	108.75	1215	8	113	BA (12.8-14.8)	NBP1103-DH134-Fc-144	Li et al. (2020)	NaN		1	1	1
-57	-67	1012	12363	42	C	NaN	NaN	11103	68	NaN	NaN	10366	724	72.75	1215	8	113	YD (11.8-12.7)	NBP1103-DH134-Fc-159	Li et al. (2020)	NaN		1	1	1
-57	-67	1012	12421	72.5	C	NaN	NaN	11370	66	NaN	NaN	10343	969	91.75	1215	8	113	YD (11.8-12.7)	NBP1103-DH134-Fc-362	Li et al. (2020)	NaN		1	1	1
-57	-67	1012	14683	71.5	C	NaN	NaN	13288	81	NaN	NaN	12467	844	95.5	1215	8	113	BA (12.8-14.8)	NBP1103-DH134-Fc-363	Li et al. (2020)	NaN		1	1	1
-57	-67	1012	12398	35.5	C	NaN	NaN	11226	73	NaN	NaN	10359	856	77.75	1215	8	113	YD (11.8-12.7)	NBP1103-DH134-Fc-367	Li et al. (2020)	NaN		1	1	1
-57	-67	1012	20252	219.5	C	NaN	NaN	18182	113	NaN	NaN	16738	1433	217	1215	8	113	LGM (19-21.8)	NBP1103-DH134-Fc-370	Li et al. (2020)	NaN		1	1	1
-57	-67	1012	15821	82.5	C	NaN	NaN	14301	76	NaN	NaN	13195	1109	101.75	1215	8	113	HS1 (15-17.5)	NBP1103-DH134-Fc-388	Li et al. (2020)	NaN		1	1	1
-57	-67	1012	14424	90	C	NaN	NaN	13298	72	NaN	NaN	12398	896	82.5	1215	8	113	BA (12.8-14.8)	NBP1103-DH134-Fc-527	Li et al. (2020)	NaN		1	1	1
-57	-67	1012	14503	155	C	NaN	NaN	13226	72	NaN	NaN	12422	808	91.25	1215	8	113	BA (12.8-14.8)	NBP1103-DH134-Fc-534	Li et al. (2020)	NaN		1	1	1
-57	-67	1012	14193	50.5	C	NaN	NaN	13209	73	NaN	NaN	12297	917	82	1215	8	113	BA (12.8-14.8)	NBP1103-DH134-Fc-536	Li et al. (2020)	NaN		1	1	1
-57	-67	1012	12390	48.5	C	NaN	NaN	11231	64	NaN	NaN	10375	854	74	1215	8	113	YD (11.8-12.7)	NBP1103-DH134-Fc-545	Li et al. (2020)	NaN		1	1	1
-57	-67	1012	14464	54	C	NaN	NaN	13320	72	NaN	NaN	12408	907	76.75	1215	8	113	BA (12.8-14.8)	NBP1103-DH134-Fc-760	Li et al. (2020)	NaN		1	1	1
-57	-67	1012	12325	46	C	NaN	NaN	11352	66	NaN	NaN	10378	965	70.75	1215	8	113	YD (11.8-12.7)	NBP1103-DH134-Fc-762	Li et al. (2020)	NaN		1	1	1
-57	-67	1012	12553	45	C	NaN	NaN	11434	66	NaN	NaN	10475	924	80.25	1215	8	113	YD (11.8-12.7)	NBP1103-DH134-Fc-763	Li et al. (2020)	NaN		1	1	1
-57	-67	1012	14111	50	C	NaN	NaN	13150	72	NaN	NaN	12241	923	97.25	1215	8	113	BA (12.8-14.8)	NBP1103-DH134-Fc-779	Li et al. (2020)	NaN		1	1	1
-54.8095	-62.167	727	15301	130	C	NaN	NaN	13672	56	NaN	NaN	12837	841	113	1168	8	113	HS1 (15-17.5)	NBP1103-DH14-Bc-1002	Li et al. (2020)	NaN		1	1	1
-54.8095	-62.167	727	12536	58.5	C	NaN	NaN	11153	37	NaN	NaN	10526	649	73.25	1168	8	113	YD (11.8-12.7)	NBP1103-DH14-Bc-1003	Li et al. (2020)	NaN		1	1	1
-54.8095	-62.167	727	13005	49.5	C	NaN	NaN	11742	56	NaN	NaN	11062	684	68.75	1168	8	113	BA (12.8-14.8)	NBP1103-DH14-Bn-278	Li et al. (2020)	NaN		1	1	1
-54.8095	-62.167	727	16405	79.5	C	NaN	NaN	14718	77	NaN	NaN	13605	1119	99.5	1168	8	113	HS1 (15-17.5)	NBP1103-DH14-Fc-277	Li et al. (2020)	NaN		1	1	1
-57	-67	648	16417	202	C	NaN	NaN	14351	79	NaN	NaN	13612	746	156.25	1084	8	113	HS1 (15-17.5)	NBP1103-DH140-Bc-2	Li et al. (2020)	NaN		1	1	1
-57	-67	648	15158	86	C	NaN	NaN	13715	74	NaN	NaN	12713	1003	106.75	1084	8	113	HS1 (15-17.5)	NBP1103-DH140-Fc-a(1)	Li et al. (2020)	NaN		1	1	1
-57	-67	1874	15768	108	C	NaN	NaN	14723	78	NaN	NaN	13151	1572	116.5	1335	8	113	HS1 (15-17.5)	NBP1103-DH143-D(f)-2	Li et al. (2020)	NaN		1	1	1
-57	-67	1877	15810	69.5	C	NaN	NaN	14628	68	NaN	NaN	13187	1444	91.5	1335	8	113	HS1 (15-17.5)	NBP1103-DH143-D(f)-5	Li et al. (2020)	NaN		1	1	1
-54.8095	-62.167	894	16855	89	C	NaN	NaN	14880	61	NaN	NaN	13846	1026	86	1210	8	113	HS1 (15-17.5)	NBP1103-DH15-Bc-1	Li et al. (2020)	NaN		1	1	1
-54.8095	-62.167	1879	14699	97	C	NaN	NaN	13782	87	NaN	NaN	12446	1339	101.5	1328	8	113	BA (12.8-14.8)	NBP1103-DH22-Fn-04	Li et al. (2020)	NaN		1	1	1
-54.8095	-62.167	1879	14768	50	C	NaN	NaN	13782	87	NaN	NaN	12368	1370	102.5	1328	8	113	BA (12.8-14.8)	NBP1103-DH22-Fn-04	Li et al. (2020)	NaN		1	1	1
-60.1817	-57.8333	823	13324	41.5	C	NaN	NaN	12329	69	NaN	NaN	11471	872	89.5	1252	8	113	BA (12.8-14.8)	NBP1103-DH43-Dc-7	Li et al. (2020)	NaN		1	1	1
-60.5625	-65.9567	1064	13636	119	C	NaN	NaN	12424	69	NaN	NaN	11812	630	144.25	1259	8	113	BA (12.8-14.8)	NBP1103-DH74-Dc-5	Li et al. (2020)	NaN		1	1	1
-59.7637	-68.9333	776	14627	121.5	C	NaN	NaN	13258	74	NaN	NaN	12475	816	87.75	1151	8	113	BA (12.8-14.8)	NBP1103-DH95-cc-1	Li et al. (2020)	NaN		1	1	1
-59.7637	-68.9333	776	12384	49.5	C	NaN	NaN	11342	68	NaN	NaN	10377	964	76.5	1151	8	113	YD (11.8-12.7)	NBP1103-DH95-cc-142	Li et al. (2020)	NaN		1	1	1
-59.7637	-68.9333	776	10267	54	C	NaN	NaN	9922	64	NaN	NaN	9173.6	774	104	1151	8	113	EHOL (7-11)	NBP1103-DH95-cc-143	Li et al. (2020)	NaN		1	1	1
-59.7637	-68.9333	776	11657	94	C	NaN	NaN	10678	66	NaN	NaN	10097	605	82	1151	8	113		NBP1103-DH95-cc-145	Li et al. (2020)	NaN		1	1	1
23.22	-111.08	150	11460	25	C	11450	35	NaN	NaN	NaN	NaN	10008	1430	42	750	3	114		MV99-GC38	Lindsay et al. (2016)	2.1815	Extreme depletions	0	0	0
23.22	-111.08	150	11550	25	C	11340	35	NaN	NaN	NaN	NaN	10032	1307	41.75	750	3	114		MV99-GC38	Lindsay et al. (2016)	2.33766	Extreme depletions	0	0	0
23.22	-111.08	150	11700	30	C	11910	35	NaN	NaN	NaN	NaN	10086	1826	45.25	750	3	114		MV99-GC38	Lindsay et al. (2016)	2.47863	Extreme depletions	0	0	0
23.22	-111.08	150	12570	326	C	11875	30	NaN	NaN	NaN	NaN	10472	1336	233.5	750	3	114		MV99-GC38	Lindsay et al. (2016)	2.86396	Extreme depletions	0	0	0
23.22	-111.08	150	13620	175	C	13030	30	NaN	NaN	NaN	NaN	11845	1241	170.5	750	3	114	BA (12.8-14.8)	MV99-GC38	Lindsay et al. (2016)	3.01028	Extreme depletions	0	0	0
23.22	-111.08	150	13910	95	C	13090	30	NaN	NaN	NaN	NaN	12062	1059	100.75	750	3	114	BA (12.8-14.8)	MV99-GC38	Lindsay et al. (2016)	3.0913	Extreme depletions	0	0	0
23.22	-111.08	150	14380	75	C	13715	40	NaN	NaN	NaN	NaN	12397	1325	57.75	750	3	114	BA (12.8-14.8)	MV99-GC38	Lindsay et al. (2016)	3.26843	Extreme depletions	0	0	0
23.22	-111.08	150	14490	116.5	C	13895	30	NaN	NaN	NaN	NaN	12417	1475	56.25	750	3	114	BA (12.8-14.8)	MV99-GC38	Lindsay et al. (2016)	3.45066	Extreme depletions	0	0	0
23.22	-111.08	150	14580	105	C	13755	30	NaN	NaN	NaN	NaN	12458	1313	52.75	750	3	114	BA (12.8-14.8)	MV99-GC38	Lindsay et al. (2016)	3.56653	Extreme depletions	0	0	0
23.22	-111.08	150	14700	50	C	13845	30	NaN	NaN	NaN	NaN	12445	1405	61.75	750	3	114	BA (12.8-14.8)	MV99-GC38	Lindsay et al. (2016)	3.7415	Extreme depletions	0	0	0
23.22	-111.08	150	15550	365	C	14630	40	NaN	NaN	NaN	NaN	12969	1639	256.75	750	3	114	HS1 (15-17.5)	MV99-GC38	Lindsay et al. (2016)	3.66559	Extreme depletions	0	0	0
23.22	-111.08	150	16640	350	C	15090	40	NaN	NaN	NaN	NaN	13755	1335	245.75	750	3	114	HS1 (15-17.5)	MV99-GC38	Lindsay et al. (2016)	3.54567	Extreme depletions	0	0	0
23.22	-111.08	150	17100	205	C	15300	30	NaN	NaN	NaN	NaN	14116	1211	149	750	3	114	HS1 (15-17.5)	MV99-GC38	Lindsay et al. (2016)	3.56725	Extreme depletions	0	0	0
23.22	-111.08	150	18190	310	C	15735	40	NaN	NaN	NaN	NaN	14812	885	262.75	750	3	114		MV99-GC38	Lindsay et al. (2016)	3.46344	Extreme depletions	0	0	0
23.22	-111.08	150	18940	280	C	16210	40	NaN	NaN	NaN	NaN	15706	501	264.5	750	3	114	LGM (19-21.8)	MV99-GC38	Lindsay et al. (2016)	3.53749	Extreme depletions	0	0	0
23.22	-111.08	150	19940	316	C	17415	40	NaN	NaN	NaN	NaN	16534	890	266	750	3	114	LGM (19-21.8)	MV99-GC38	Lindsay et al. (2016)	3.81143	Extreme depletions	0	0	0
23.22	-111.08	150	20760	265	C	18270	50	NaN	NaN	NaN	NaN	17155	1085	227.5	750	3	114	LGM (19-21.8)	MV99-GC38	Lindsay et al. (2016)	4.04624	Extreme depletions	0	0	0
23.22	-111.08	150	22250	375	C	19440	50	NaN	NaN	NaN	NaN	18281	1135	322.25	750	3	114		MV99-GC38	Lindsay et al. (2016)	4.13483	Extreme depletions	0	0	0
23.22	-111.08	150	24550	515	C	21210	60	NaN	NaN	NaN	NaN	20397	766	358.5	750	3	114	preLGM (25-30)	MV99-GC38	Lindsay et al. (2016)	4.23625	Extreme depletions	0	0	0
23.22	-111.08	150	31150	225.5	C	26360	190	NaN	NaN	NaN	NaN	27094	-755	407.75	750	3	114		MV99-GC38	Lindsay et al. (2016)	4.7512	Extreme depletions, negative	0	0	0
23.22	-111.08	1270	11460	25	C	NaN	NaN	11635	35	NaN	NaN	10008	1615	42	1812	3	114		MV99-GC38	Lindsay et al. (2016)	22.2222	Extreme depletions	0	0	0
23.22	-111.08	1270	11550	25	C	NaN	NaN	11985	35	NaN	NaN	10032	1952	41.75	1812	3	114		MV99-GC38	Lindsay et al. (2016)	13.3333	Extreme depletions	0	0	0
23.22	-111.08	1270	11700	30	C	NaN	NaN	12250	35	NaN	NaN	10086	2166	45.25	1812	3	114		MV99-GC38	Lindsay et al. (2016)	7.40741	Extreme depletions	0	0	0
23.22	-111.08	1270	11970	225	C	NaN	NaN	12665	40	NaN	NaN	10285	2387	113.75	1812	3	114	YD (11.8-12.7)	MV99-GC38	Lindsay et al. (2016)	8.10811	Extreme depletions	0	0	0
23.22	-111.08	1270	12340	321.5	C	NaN	NaN	12670	40	NaN	NaN	10424	2271	170.5	1812	3	114	YD (11.8-12.7)	MV99-GC38	Lindsay et al. (2016)	8.69565	Extreme depletions	0	0	0
23.22	-111.08	1270	12570	326	C	NaN	NaN	13150	40	NaN	NaN	10472	2610	236.5	1812	3	114		MV99-GC38	Lindsay et al. (2016)	4.83871	Extreme depletions	0	0	0
23.22	-111.08	1270	13190	364	C	NaN	NaN	13525	40	NaN	NaN	11355	2190	313.25	1812	3	114	BA (12.8-14.8)	MV99-GC38	Lindsay et al. (2016)	4.65116	Extreme depletions	0	0	0
23.22	-111.08	1270	13620	175	C	NaN	NaN	13545	40	NaN	NaN	11845	1758	173.5	1812	3	114	BA (12.8-14.8)	MV99-GC38	Lindsay et al. (2016)	6.89655	Extreme depletions	0	0	0
23.22	-111.08	1270	13910	95	C	NaN	NaN	13955	45	NaN	NaN	12062	1924	103.75	1812	3	114	BA (12.8-14.8)	MV99-GC38	Lindsay et al. (2016)	9.09091	Extreme depletions	0	0	0
23.22	-111.08	1270	14130	182	C	NaN	NaN	13420	40	NaN	NaN	12252	1174	136.75	1812	3	114	BA (12.8-14.8)	MV99-GC38	Lindsay et al. (2016)	8	Extreme depletions	0	0	0
23.22	-111.08	1270	14380	75	C	NaN	NaN	14125	45	NaN	NaN	12397	1736	61	1812	3	114	BA (12.8-14.8)	MV99-GC38	Lindsay et al. (2016)	27.2727	Extreme depletions	0	0	0
23.22	-111.08	1270	14490	116.5	C	NaN	NaN	14090	45	NaN	NaN	12417	1669	65	1812	3	114	BA (12.8-14.8)	MV99-GC38	Lindsay et al. (2016)	22.2222	Extreme depletions	0	0	0
23.22	-111.08	1270	14580	105	C	NaN	NaN	14360	45	NaN	NaN	12458	1919	62.25	1812	3	114	BA (12.8-14.8)	MV99-GC38	Lindsay et al. (2016)	25	Extreme depletions	0	0	0
23.22	-111.08	1270	14700	50	C	NaN	NaN	14835	50	NaN	NaN	12445	2397	73.75	1812	3	114	BA (12.8-14.8)	MV99-GC38	Lindsay et al. (2016)	2.35294	Extreme depletions	0	0	0
23.22	-111.08	1270	15550	365	C	NaN	NaN	15970	60	NaN	NaN	12969	2977	260.75	1812	3	114	HS1 (15-17.5)	MV99-GC38	Lindsay et al. (2016)	1.83486	Extreme depletions	0	0	0
23.22	-111.08	1270	16640	350	C	NaN	NaN	16290	40	NaN	NaN	13755	2535	245.75	1812	3	114	HS1 (15-17.5)	MV99-GC38	Lindsay et al. (2016)	4.34783	Extreme depletions	0	0	0
23.22	-111.08	1270	17100	205	C	NaN	NaN	16420	40	NaN	NaN	14116	2334	173.5	1812	3	114	HS1 (15-17.5)	MV99-GC38	Lindsay et al. (2016)	1.83486	Extreme depletions	0	0	0
23.22	-111.08	1270	18190	310	C	NaN	NaN	16610	40	NaN	NaN	14812	1760	262.75	1812	3	114		MV99-GC38	Lindsay et al. (2016)	4.87805	Extreme depletions	0	0	0
23.22	-111.08	1270	18600	378	C	NaN	NaN	17100	40	NaN	NaN	15147	1832	281.75	1812	3	114		MV99-GC38	Lindsay et al. (2016)	6.77966	Extreme depletions	0	0	0
23.22	-111.08	1270	19190	323	C	NaN	NaN	17135	40	NaN	NaN	15935	1206	298	1812	3	114	LGM (19-21.8)	MV99-GC38	Lindsay et al. (2016)	3.59562	Extreme depletions	0	0	0
23.61	-111.56	150	12430	210	C	12825	45	NaN	NaN	NaN	NaN	10363	2396	124.75	750	3	115	YD (11.8-12.7)	MV99-MC17/GC32/PC10	Lindsay et al. (2016)	21.7216	Extreme depletions	0	0	0
23.61	-111.56	150	13200	385	C	13035	50	NaN	NaN	NaN	NaN	11356	1689	321	750	3	115	BA (12.8-14.8)	MV99-MC17/GC32/PC10	Lindsay et al. (2016)	21.0606	Extreme depletions	0	0	0
23.61	-111.56	150	13440	115	C	12820	50	NaN	NaN	NaN	NaN	11547	1249	137.5	750	3	115	BA (12.8-14.8)	MV99-MC17/GC32/PC10	Lindsay et al. (2016)	21.2054	Extreme depletions	0	0	0
23.61	-111.56	150	13630	85	C	13045	35	NaN	NaN	NaN	NaN	11826	1247	96.25	750	3	115	BA (12.8-14.8)	MV99-MC17/GC32/PC10	Lindsay et al. (2016)	21.4233	Extreme depletions	0	0	0
23.61	-111.56	150	13810	70	C	13055	35	NaN	NaN	NaN	NaN	12013	1079	85.5	750	3	115	BA (12.8-14.8)	MV99-MC17/GC32/PC10	Lindsay et al. (2016)	21.651	Extreme depletions	0	0	0
23.61	-111.56	150	13940	109.5	C	13425	45	NaN	NaN	NaN	NaN	12020	1381	117.5	750	3	115	BA (12.8-14.8)	MV99-MC17/GC32/PC10	Lindsay et al. (2016)	21.9512	Extreme depletions	0	0	0
23.61	-111.56	150	14100	50	C	13335	50	NaN	NaN	NaN	NaN	12228	1118	86.5	750	3	115	BA (12.8-14.8)	MV99-MC17/GC32/PC10	Lindsay et al. (2016)	22.1986	Extreme depletions	0	0	0
23.61	-111.56	150	14260	55	C	13380	60	NaN	NaN	NaN	NaN	12325	1052	73.5	750	3	115	BA (12.8-14.8)	MV99-MC17/GC32/PC10	Lindsay et al. (2016)	22.4404	Extreme depletions	0	0	0
23.61	-111.56	150	14430	130.5	C	13285	35	NaN	NaN	NaN	NaN	12398	882	66.75	750	3	115	BA (12.8-14.8)	MV99-MC17/GC32/PC10	Lindsay et al. (2016)	22.6611	Extreme depletions	0	0	0
23.61	-111.56	150	14600	166.5	C	13155	35	NaN	NaN	NaN	NaN	12466	720	68.25	750	3	115	BA (12.8-14.8)	MV99-MC17/GC32/PC10	Lindsay et al. (2016)	22.8767	Extreme depletions	0	0	0
23.61	-111.56	150	14860	149	C	14330	40	NaN	NaN	NaN	NaN	12494	1832	103.25	750	3	115		MV99-MC17/GC32/PC10	Lindsay et al. (2016)	22.9475	Extreme depletions	0	0	0
23.61	-111.56	150	16430	1061	C	13625	40	NaN	NaN	NaN	NaN	13618	-51	634	750	3	115	HS1 (15-17.5)	MV99-MC17/GC32/PC10	Lindsay et al. (2016)	21.6068	Extreme depletions, negative	0	0	0
23.61	-111.56	150	17230	1569	C	16530	70	NaN	NaN	NaN	NaN	14149	2155	1155.75	750	3	115	HS1 (15-17.5)	MV99-MC17/GC32/PC10	Lindsay et al. (2016)	21.0099	Extreme depletions	0	0	0
23.61	-111.56	150	17920	1746	C	17200	70	NaN	NaN	NaN	NaN	14635	2261	1148.25	750	3	115		MV99-MC17/GC32/PC10	Lindsay et al. (2016)	20.5915	Extreme depletions	0	0	0
23.61	-111.56	150	18710	1240	C	15160	60	NaN	NaN	NaN	NaN	15369	-458	932.5	750	3	115		MV99-MC17/GC32/PC10	Lindsay et al. (2016)	20.0962	Extreme depletions, negative	0	0	0
23.61	-111.56	150	19480	745	C	16720	70	NaN	NaN	NaN	NaN	16111	521	582	750	3	115	LGM (19-21.8)	MV99-MC17/GC32/PC10	Lindsay et al. (2016)	19.6612	Extreme depletions	0	0	0
23.61	-111.56	150	20250	298	C	17440	60	NaN	NaN	NaN	NaN	16736	692	243.5	750	3	115	LGM (19-21.8)	MV99-MC17/GC32/PC10	Lindsay et al. (2016)	19.2593	Extreme depletions	0	0	0
23.61	-111.56	150	22300	800	C	19580	80	NaN	NaN	NaN	NaN	18332	1135	603.75	750	3	115	LGM (19-21.8)	MV99-MC17/GC32/PC10	Lindsay et al. (2016)	18.7444	Extreme depletions	0	0	0
23.61	-111.56	150	25680	1533	C	22940	190	NaN	NaN	NaN	NaN	21265	1221	1442.25	750	3	115	preLGM (25-30)	MV99-MC17/GC32/PC10	Lindsay et al. (2016)	18.1854	Extreme depletions	0	0	0
23.61	-111.56	430	11060	351	C	NaN	NaN	10865	30	NaN	NaN	9547	1231	229.5	1003	3	115	EHOL (7-11)	MV99-MC17/GC32/PC10	Lindsay et al. (2016)	14.9	Extreme depletions	0	0	0
23.61	-111.56	430	11390	212	C	NaN	NaN	10790	30	NaN	NaN	9955	805	152.5	1003	3	115		MV99-MC17/GC32/PC10	Lindsay et al. (2016)	14.9	Extreme depletions	0	0	0
23.61	-111.56	430	11560	174.5	C	NaN	NaN	12000	70	NaN	NaN	10025	1956	119	1003	3	115		MV99-MC17/GC32/PC10	Lindsay et al. (2016)	14.9	Extreme depletions	0	0	0
23.61	-111.56	430	11950	115	C	NaN	NaN	12590	35	NaN	NaN	10281	2326	81.25	1003	3	115	YD (11.8-12.7)	MV99-MC17/GC32/PC10	Lindsay et al. (2016)	14.9	Extreme depletions	0	0	0
23.61	-111.56	430	12430	210	C	NaN	NaN	13375	40	NaN	NaN	10363	2948	121.75	1003	3	115	YD (11.8-12.7)	MV99-MC17/GC32/PC10	Lindsay et al. (2016)	14.9	Extreme depletions	0	0	0
23.61	-111.56	430	12680	282	C	NaN	NaN	12700	80	NaN	NaN	10622	2029	275	1003	3	115		MV99-MC17/GC32/PC10	Lindsay et al. (2016)	14.9	Extreme depletions	0	0	0
23.61	-111.56	430	13200	385	C	NaN	NaN	13055	35	NaN	NaN	11356	1707	313.5	1003	3	115	BA (12.8-14.8)	MV99-MC17/GC32/PC10	Lindsay et al. (2016)	14.9	Extreme depletions	0	0	0
23.61	-111.56	430	13430	115	C	NaN	NaN	13130	35	NaN	NaN	11541	1572	132.75	1003	3	115	BA (12.8-14.8)	MV99-MC17/GC32/PC10	Lindsay et al. (2016)	14.9	Extreme depletions	0	0	0
23.61	-111.56	430	13630	85	C	NaN	NaN	13165	35	NaN	NaN	11826	1367	96.25	1003	3	115	BA (12.8-14.8)	MV99-MC17/GC32/PC10	Lindsay et al. (2016)	14.9	Extreme depletions	0	0	0
23.61	-111.56	430	13810	70	C	NaN	NaN	12980	35	NaN	NaN	12013	1004	85.5	1003	3	115	BA (12.8-14.8)	MV99-MC17/GC32/PC10	Lindsay et al. (2016)	14.9	Extreme depletions	0	0	0
23.61	-111.56	430	13940	109.5	C	NaN	NaN	13090	35	NaN	NaN	12020	1047	115	1003	3	115	BA (12.8-14.8)	MV99-MC17/GC32/PC10	Lindsay et al. (2016)	14.9	Extreme depletions	0	0	0
23.61	-111.56	430	14100	50	C	NaN	NaN	13080	35	NaN	NaN	12228	861	78.5	1003	3	115	BA (12.8-14.8)	MV99-MC17/GC32/PC10	Lindsay et al. (2016)	14.9	Extreme depletions	0	0	0
23.61	-111.56	430	14260	55	C	NaN	NaN	13420	35	NaN	NaN	12325	1093	56	1003	3	115	BA (12.8-14.8)	MV99-MC17/GC32/PC10	Lindsay et al. (2016)	14.9	Extreme depletions	0	0	0
23.61	-111.56	430	14420	123	C	NaN	NaN	13300	75	NaN	NaN	12397	902	92	1003	3	115	BA (12.8-14.8)	MV99-MC17/GC32/PC10	Lindsay et al. (2016)	14.9	Extreme depletions	0	0	0
23.61	-111.56	430	11950	115	C	12230	45	NaN	NaN	NaN	NaN	10281	1967	86.25	1003	3	115	YD (11.8-12.7)	MV99-MC17/GC32/PC10	Lindsay et al. (2016)	22.0084	Extreme depletions	0	0	0
42.12	-125.75	2710	8158	110	TS	8200	40	9580	40	1380	57	7290	2232	117.5	2252	3	116	EHOL (7-11)	W8709A-13PC	Lund et al. (2011)	8.45796		1	1	0
42.12	-125.75	2710	8680	103	TS	8680	60	9975	40	1295	72	7903	2068	87.5	2252	3	116	EHOL (7-11)	W8709A-13PC	Lund et al. (2011)	9.10138		1	1	0
42.12	-125.75	2710	9016.5	100	TS	8895	40	10085	40	1190	57	8114.9	1984	95.5	2252	3	116	EHOL (7-11)	W8709A-13PC	Lund et al. (2011)	9.64898		1	1	1
42.12	-125.75	2710	9565.5	98	TS	9400	80	10540	40	1140	89	8701.4	1888	127.5	2252	3	116	EHOL (7-11)	W8709A-13PC	Lund et al. (2011)	10.2452		1	1	1
42.12	-125.75	2710	9837	102	TS	9580	70	10740	45	1160	83	8809	1931	71.75	2252	3	116	EHOL (7-11)	W8709A-13PC	Lund et al. (2011)	10.5723		1	1	1
42.12	-125.75	2710	10365	117	TS	9940	70	11270	50	1330	86	9201	2055	128.25	2252	3	116	EHOL (7-11)	W8709A-13PC	Lund et al. (2011)	11.8669		1	1	1
42.12	-125.75	2710	11288	122	TS	10610	80	12160	45	1550	92	9935	2246	130	2252	3	116		W8709A-13PC	Lund et al. (2011)	12.4911		1	1	1
42.12	-125.75	2710	11751.5	84	TS	11005	40	12520	35	1515	53	10124	2401	66.5	2252	3	116	YD (11.8-12.7)	W8709A-13PC	Lund et al. (2011)	12.4239		1	1	1
42.12	-125.75	2710	11913	127	TS	10985	40	12685	35	1700	53	10211	2450	87.5	2252	3	116	YD (11.8-12.7)	W8709A-13PC	Lund et al. (2011)	13.0949		1	1	1
42.12	-125.75	2710	12619	130	TS	11615	45	13115	35	1500	57	10570	2544	117.5	2252	3	116	YD (11.8-12.7)	W8709A-13PC	Lund et al. (2011)	12.7585		1	1	1
42.12	-125.75	2710	13043	73	TS	12035	45	13700	50	1665	67	11054	2616	98.5	2252	3	116	BA (12.8-14.8)	W8709A-13PC	Lund et al. (2011)	13.5705		1	1	1
42.12	-125.75	2710	13510	105	TS	12510	60	14115	40	1605	72	11689	2453	118.5	2252	3	116	BA (12.8-14.8)	W8709A-13PC	Lund et al. (2011)	13.7676		1	1	1
42.12	-125.75	2710	14260	131	TS	13080	35	14545	45	1465	57	12325	2217	103.5	2252	3	116	BA (12.8-14.8)	W8709A-13PC	Lund et al. (2011)	14.0954		1	1	1
42.12	-125.75	2710	15348	116	TS	13770	35	15155	50	1385	61	12880	2289	100	2252	3	116	HS1 (15-17.5)	W8709A-13PC	Lund et al. (2011)	14.0735		1	1	1
42.12	-125.75	2710	15659	107	TS	14015	35	15550	99	1535	105	13064	2485	132.25	2252	3	116	HS1 (15-17.5)	W8709A-13PC	Lund et al. (2011)	14.0494		1	1	1
42.12	-125.75	2710	16280	70	TS	14490	35	16025	50	1535	61	13498	2523	80.75	2252	3	116	HS1 (15-17.5)	W8709A-13PC	Lund et al. (2011)	14.4963		1	1	1
42.12	-125.75	2710	16536	56	TS	14690	35	16290	60	1600	69	13675	2610	79.75	2252	3	116	HS1 (15-17.5)	W8709A-13PC	Lund et al. (2011)	14.6347		1	1	1
42.12	-125.75	2710	16782	79	TS	14840	45	16690	60	1850	75	13822	2868	77	2252	3	116	HS1 (15-17.5)	W8709A-13PC	Lund et al. (2011)	14.9565		1	1	1
42.12	-125.75	2710	17205	111	TS	15260	35	16990	120	1730	125	14153	2837	155.25	2252	3	116	HS1 (15-17.5)	W8709A-13PC	Lund et al. (2011)	14.9375		1	1	1
42.12	-125.75	2710	17532.5	76	TS	15500	40	17015	127	1515	133	14456	2574	138	2252	3	116	HS1 (15-17.5)	W8709A-13PC	Lund et al. (2011)	15.2289		1	1	1
42.12	-125.75	2710	17745	168	TS	15620	35	17200	157	1580	161	14474	2683	186.75	2252	3	116		W8709A-13PC	Lund et al. (2011)	15.3846		1	1	1
42.12	-125.75	2710	20368	283	TS	17940	45	19170	156	1230	162	16831	2314	283.25	2252	3	116	LGM (19-21.8)	W8709A-13PC	Lund et al. (2011)	15.3181		1	1	1
42.12	-125.75	2710	22355.5	230	TS	19640	60	21530	142	1890	154	18409	3092	276.75	2252	3	116		W8709A-13PC	Lund et al. (2011)	15.1641		1	1	1
-27.4833	-46.3333	1829	640	10	TS	1235	15	2305	35	1070	38	626	1672	42.75	887	2	117	HOL (<6)	KNR159-5 78GGC	Lund et al. (2015)	1.5625	Low sed rate <2cm/kyr *	0	1	0
-27.4833	-46.3333	1829	6012	24	TS	5810	15	6260	40	450	43	5309.8	967	58.25	887	2	117	HOL (<6)	KNR159-5 78GGC	Lund et al. (2015)	1.49701	Low sed rate <2cm/kyr *	0	1	0
-27.4833	-46.3333	1829	7808	22	TS	7530	20	9040	70	1510	73	6989	2062	74.25	887	2	117	EHOL (7-11)	KNR159-5 78GGC	Lund et al. (2015)	1.66496	Low sed rate <2cm/kyr *	0	1	0
-27.4833	-46.3333	1829	9312	31	TS	8800	25	10535	45	1735	51	8316.4	2224	60.25	887	2	117	EHOL (7-11)	KNR159-5 78GGC	Lund et al. (2015)	1.8256	Low sed rate <2cm/kyr *	0	1	0
-27.4833	-46.3333	1829	11364	38	TS	10390	20	12055	40	1665	45	9987	2081	54.75	887	2	117		KNR159-5 78GGC	Lund et al. (2015)	2.19993	Bioturbation issues suspected	1	1	0
-27.4833	-46.3333	1829	13869	49	TS	12475	35	13295	45	820	57	12038	1266	67.5	887	2	117	BA (12.8-14.8)	KNR159-5 78GGC	Lund et al. (2015)	2.37941	Bioturbation issues suspected	1	1	0
-27.4833	-46.3333	1829	14141	53	TS	12685	35	13715	40	1030	53	12256	1458	69.5	887	2	117	BA (12.8-14.8)	KNR159-5 78GGC	Lund et al. (2015)	2.61651	Bioturbation issues suspected	1	1	0
-27.4833	-46.3333	1829	15336	55	TS	13435	40	14490	70	1055	81	12871	1627	89	887	2	117	HS1 (15-17.5)	KNR159-5 78GGC	Lund et al. (2015)	2.93427	Bioturbation issues suspected	1	1	0
-27.4833	-46.3333	1829	15801	50	TS	13785	35	14730	60	945	69	13179	1551	79.75	887	2	117	HS1 (15-17.5)	KNR159-5 78GGC	Lund et al. (2015)	3.10107	Bioturbation issues suspected	1	1	0
-27.4833	-46.3333	1829	16189	66	TS	14085	54	15078	71	993	89	13429	1644	89	887	2	117	HS1 (15-17.5)	KNR159-5 78GGC	Lund et al. (2015)	3.64445	Bioturbation issues suspected	1	1	0
-27.4833	-46.3333	1829	17267	74	TS	14960	60	15790	45	830	75	14152	1615	90.75	887	2	117	HS1 (15-17.5)	KNR159-5 78GGC	Lund et al. (2015)	5.15434	Bioturbation issues suspected	1	1	0
-27.4833	-46.3333	1829	17367	96	TS	15040	70	15840	40	800	81	14275	1557	111.75	887	2	117	HS1 (15-17.5)	KNR159-5 78GGC	Lund et al. (2015)	5.58531	Bioturbation issues suspected	1	1	0
-27.4833	-46.3333	1829	17808	61	TS	15360	50	15810	50	450	71	14523	1281	87	887	2	117		KNR159-5 78GGC	Lund et al. (2015)	5.89623	Bioturbation issues suspected	1	1	0
-27.4833	-46.3333	1829	18184	67	TS	15723	72	16408	78	685	106	14800	1587	154.5	887	2	117		KNR159-5 78GGC	Lund et al. (2015)	6.32424	Bioturbation issues suspected	1	1	0
-27.4833	-46.3333	1829	18676	50	TS	16160	60	16900	60	740	85	15316	1587	111.75	887	2	117		KNR159-5 78GGC	Lund et al. (2015)	6.69308	Bioturbation issues suspected	1	1	0
-27.4833	-46.3333	1829	19248	86	TS	16700	70	17250	70	550	99	15971	1289	95	887	2	117	LGM (19-21.8)	KNR159-5 78GGC	Lund et al. (2015)	7.11762	Bioturbation issues suspected	1	1	0
-27.4833	-46.3333	1829	19594	76	TS	16990	60	17720	80	730	100	16300	1434	127.5	887	2	117	LGM (19-21.8)	KNR159-5 78GGC	Lund et al. (2015)	7.80851	Bioturbation issues suspected	1	1	0
14.5	93.1167	1375	2651	146	NA	3060	60	4180	60	1120	85	2462	1666	135.5	1533	5	118	HOL (<6)	MD77-176	Ma et al. (2020)	58.6455		1	1	1
14.5	93.1167	1375	2651	146	NA	NaN	NaN	4270	55	NaN	NaN	2462	1758	132.5	1533	5	118	HOL (<6)	MD77-176	Ma et al. (2020)	58.6455		1	1	1
14.5	93.1167	1375	5294	157.5	NA	5120	70	5870	60	750	92	4538.2	1295	131.75	1533	5	118	HOL (<6)	MD77-176	Ma et al. (2020)	58.6455		1	1	1
14.5	93.1167	1375	5294	157.5	NA	NaN	NaN	6110	70	NaN	NaN	4538.2	1532	137.75	1533	5	118	HOL (<6)	MD77-176	Ma et al. (2020)	42.886		1	1	1
14.5	93.1167	1375	7276	149	NA	6960	80	7890	90	930	120	6372.2	1533	175.75	1533	5	118	EHOL (7-11)	MD77-176	Ma et al. (2020)	34.6715		1	1	1
14.5	93.1167	1375	10016	144	NA	NaN	NaN	9700	90	NaN	NaN	8900.8	814	136	1533	5	118	EHOL (7-11)	MD77-176	Ma et al. (2020)	21.5208		1	1	1
14.5	93.1167	1375	10016	144	NA	9350	45	9730	100	380	110	8900.8	843	142	1533	5	118	EHOL (7-11)	MD77-176	Ma et al. (2020)	34.6715		1	1	1
14.5	93.1167	1375	12107	221.25	NA	10950	90	11080	100	130	135	10373	750	145	1533	5	118	YD (11.8-12.7)	MD77-176	Ma et al. (2020)	67.6393		1	1	1
14.5	93.1167	1375	12861	148	NA	11450	90	11650	90	200	127	10980	689	206.75	1533	5	118	BA (12.8-14.8)	MD77-176	Ma et al. (2020)	22.3624		1	1	1
14.5	93.1167	1375	14605	271.25	NA	12910	110	13680	110	770	156	12468	1245	162.5	1533	5	118	BA (12.8-14.8)	MD77-176	Ma et al. (2020)	11.4416		1	1	1
14.5	93.1167	1375	17227	232.75	NA	14880	70	15260	80	380	106	14149	1090	199.5	1533	5	118	HS1 (15-17.5)	MD77-176	Ma et al. (2020)	12.9366		1	1	1
14.5	93.1167	1375	18773	199.5	NA	16420	70	17250	280	830	289	15441	1784	360.25	1533	5	118		MD77-176	Ma et al. (2020)	46.8521		1	1	1
14.5	93.1167	1375	19456	253	NA	16660	120	17950	130	1290	177	16085	1828	244.25	1533	5	118	LGM (19-21.8)	MD77-176	Ma et al. (2020)	16.9282		1	1	1
14.5	93.1167	1375	26722	283.75	NA	23420	140	23550	360	130	386	22374	1131	430.75	1533	5	118	preLGM (25-30)	MD77-176	Ma et al. (2020)	16.9282		1	1	1
34.28	-120.03	576.5	15518	377	S	13800	280	14030	160	230	322	12947	1052	303.75	1430	3	119	HS1 (15-17.5)	ODP893A	Magana et al. (2010)	178.18		1	1	1
34.28	-120.03	576.5	16670	169	S	14690	140	15240	220	550	261	13774	1478	240.25	1430	3	119	HS1 (15-17.5)	ODP893A	Magana et al. (2010)	168.146		1	1	1
34.28	-120.03	576.5	16722	217	S	14740	180	15510	140	770	228	13801	1718	201.75	1430	3	119	HS1 (15-17.5)	ODP893A	Magana et al. (2010)	170.733		1	1	1
34.28	-120.03	576.5	16976	191	S	14940	160	15820	150	880	219	13922	1860	210.5	1430	3	119	HS1 (15-17.5)	ODP893A	Magana et al. (2010)	176.013		1	1	1
34.28	-120.03	576.5	17372	80	S	15280	60	15440	210	160	218	14284	1150	233	1430	3	119	HS1 (15-17.5)	ODP893A	Magana et al. (2010)	174.534		1	1	1
34.28	-120.03	576.5	17974	145	S	15750	130	16180	240	430	273	14670	1517	269.75	1430	3	119		ODP893A	Magana et al. (2010)	174.697		1	1	1
34.28	-120.03	576.5	18053	155	S	15830	140	16130	60	300	152	14705	1419	159.5	1430	3	119		ODP893A	Magana et al. (2010)	176.037		1	1	1
2.31167	-30.6467	2306	13950	140	C	NaN	NaN	13530	110	NaN	NaN	12008	1472	167.75	782	1	120	BA (12.8-14.8)	GeoB 1503-1	Mangini et al. (1998)	NaN		1	1	1
-24.2	-43.3	781	10522	83	C	NaN	NaN	11233	53	NaN	NaN	9334.2	1918	87.25	795	2	120	EHOL (7-11)	21210009	Mangini et al. (2010)	NaN	Time-series flag	1	1	1
-24.2	-43.3	781	10532	95	C	NaN	NaN	11135	30	NaN	NaN	9331.2	1812	80.5	795	2	120	EHOL (7-11)	21210009	Mangini et al. (2010)	NaN	Time-series flag	1	1	1
-24.2	-43.3	781	12612	168	C	NaN	NaN	10925	30	NaN	NaN	10538	358	115.25	795	2	120	YD (11.8-12.7)	21210009	Mangini et al. (2010)	NaN	Time-series flag	1	1	1
-24.2	-43.3	781	12932	173	C	NaN	NaN	10950	35	NaN	NaN	11045	72	-71.75	795	2	120	BA (12.8-14.8)	21210009	Mangini et al. (2010)	NaN	Time-series flag	1	1	1
-24.2	-43.3	781	16352	175	C	NaN	NaN	14975	40	NaN	NaN	13565	1413	128.5	795	2	120	HS1 (15-17.5)	21210009	Mangini et al. (2010)	NaN	Time-series flag	1	1	1
-24.2	-43.3	781	23522	188	C	NaN	NaN	22950	155	NaN	NaN	19550	3451	221.25	795	2	120		21210009	Mangini et al. (2010)	NaN	Time-series flag	1	1	1
-24.2	-43.3	781	25242	343	C	NaN	NaN	23540	180	NaN	NaN	20966	2588	349.75	795	2	120	preLGM (25-30)	21210009	Mangini et al. (2010)	NaN	Time-series flag	1	1	1
-24.2	-43.3	781	25952	183	C	NaN	NaN	23260	165	NaN	NaN	21740	1528	299.5	795	2	120	preLGM (25-30)	21210009	Mangini et al. (2010)	NaN	Time-series flag	1	1	1
-24.2	-43.3	781	26932	133	C	NaN	NaN	22710	160	NaN	NaN	22483	208	100.25	795	2	120	preLGM (25-30)	21210009	Mangini et al. (2010)	NaN	Time-series flag	1	1	1
-24.2	-43.3	781	27872	313	C	NaN	NaN	23000	90	NaN	NaN	23857	850	-320.75	795	2	120	preLGM (25-30)	21210009	Mangini et al. (2010)	NaN	Time-series flag	1	1	1
-22.4	-40	621	8442	145	C	NaN	NaN	10940	20	NaN	NaN	7687	3254	148	766	2	120	EHOL (7-11)	ENG-111	Mangini et al. (2010)	NaN	Time-series flag	1	1	1
-22.4	-40	621	10372	203	C	NaN	NaN	11010	25	NaN	NaN	9208.8	1790	171.5	766	2	120	EHOL (7-11)	ENG-111	Mangini et al. (2010)	NaN	Time-series flag	1	1	1
-22.4	-40	621	11692	75	C	NaN	NaN	11137	59	NaN	NaN	10071	1051	74.75	766	2	120		ENG-111	Mangini et al. (2010)	NaN	Time-series flag	1	1	1
-22.4	-40	621	14392	213	C	NaN	NaN	14135	71	NaN	NaN	12396	1755	131.25	766	2	120	BA (12.8-14.8)	ENG-111	Mangini et al. (2010)	NaN	Time-series flag	1	1	1
-22.4	-40	621	15902	310	C	NaN	NaN	14540	30	NaN	NaN	13244	1289	214.75	766	2	120	HS1 (15-17.5)	ENG-111	Mangini et al. (2010)	NaN	Time-series flag	1	1	1
-22.4	-40	621	16522	128	C	NaN	NaN	14475	25	NaN	NaN	13665	803	92.5	766	2	120	HS1 (15-17.5)	ENG-111	Mangini et al. (2010)	NaN	Time-series flag	1	1	1
-22.4	-40	621	16982	78	C	NaN	NaN	15108	75	NaN	NaN	13928	1166	116.25	766	2	120	HS1 (15-17.5)	ENG-111	Mangini et al. (2010)	NaN	Time-series flag	1	1	1
-22.4	-40	621	17522	145	C	NaN	NaN	15661	88	NaN	NaN	14453	1240	140.25	766	2	120	HS1 (15-17.5)	ENG-111	Mangini et al. (2010)	NaN	Time-series flag	1	1	1
-22.4	-40	621	17782	160	C	NaN	NaN	15555	30	NaN	NaN	14499	1036	99.25	766	2	120		ENG-111	Mangini et al. (2010)	NaN	Time-series flag	1	1	1
-22.4	-40	621	18002	490	C	NaN	NaN	15610	35	NaN	NaN	14684	916	385.25	766	2	120		ENG-111	Mangini et al. (2010)	NaN	Time-series flag	1	1	1
23.5	-111.6	705	870	300	C	NaN	NaN	2050	30	NaN	NaN	935	1086	274.25	1407	3	121	HOL (<6)	MV99-GC31	Marchitto et al. (2007)	30.597	Extreme depletions	0	0	0
23.5	-111.6	705	1540	400	C	NaN	NaN	2230	35	NaN	NaN	1668	550	325.25	1407	3	121	HOL (<6)	MV99-GC31	Marchitto et al. (2007)	31.1111	Extreme depletions	0	0	0
23.5	-111.6	705	2440	400	C	NaN	NaN	3030	40	NaN	NaN	2431	600	293.5	1407	3	121	HOL (<6)	MV99-GC31	Marchitto et al. (2007)	30.4688	Extreme depletions	0	0	0
23.5	-111.6	705	3080	400	C	NaN	NaN	3690	45	NaN	NaN	2955	749	317.5	1407	3	121	HOL (<6)	MV99-GC31	Marchitto et al. (2007)	30.8081	Extreme depletions	0	0	0
23.5	-111.6	705	4070	400	C	NaN	NaN	3840	50	NaN	NaN	3686	107	101.5	1407	3	121	HOL (<6)	MV99-GC31	Marchitto et al. (2007)	31.25	Extreme depletions	0	0	0
23.5	-111.6	705	4790	400	C	NaN	NaN	5130	60	NaN	NaN	4127	905	295	1407	3	121	HOL (<6)	MV99-GC31	Marchitto et al. (2007)	30.5556	Extreme depletions	0	0	0
23.5	-111.6	705	5690	400	C	NaN	NaN	5810	40	NaN	NaN	4973	820	285.75	1407	3	121	HOL (<6)	MV99-GC31	Marchitto et al. (2007)	30.8642	Extreme depletions	0	0	0
23.5	-111.6	705	7310	300	C	NaN	NaN	7190	50	NaN	NaN	6381	788	295	1407	3	121	EHOL (7-11)	MV99-GC31	Marchitto et al. (2007)	29.4118	Extreme depletions	0	0	0
23.5	-111.6	705	9010	300	C	NaN	NaN	8980	60	NaN	NaN	8092	884	222.5	1407	3	121	EHOL (7-11)	MV99-GC31	Marchitto et al. (2007)	28.0899	Extreme depletions	0	0	0
23.5	-111.6	705	10790	200	C	NaN	NaN	10050	410	NaN	NaN	9565	538	270.25	1407	3	121	EHOL (7-11)	MV99-GC31	Marchitto et al. (2007)	29.2683	Extreme depletions	0	0	0
23.5	-111.6	705	11610	100	C	NaN	NaN	11600	70	NaN	NaN	10041	1544	82.75	1407	3	121		MV99-GC31	Marchitto et al. (2007)	32.5	Extreme depletions	0	0	0
23.5	-111.6	705	12410	200	C	NaN	NaN	13500	70	NaN	NaN	10339	3072	144.25	1407	3	121	YD (11.8-12.7)	MV99-GC31	Marchitto et al. (2007)	30.7692	Extreme depletions	0	0	0
23.5	-111.6	705	13580	300	C	NaN	NaN	13650	150	NaN	NaN	11701	1912	332	1407	3	121	BA (12.8-14.8)	MV99-GC31	Marchitto et al. (2007)	30.279	Extreme depletions	0	0	0
23.5	-111.6	705	320	100	C	NaN	NaN	1720	30	NaN	NaN	326	1429	91.75	1407	3	122	HOL (<6)	MV99-MC19	Marchitto et al. (2007)	30.6122	Extreme depletions	0	0	0
23.5	-111.6	705	810	200	C	NaN	NaN	2050	35	NaN	NaN	946	1131	201.75	1407	3	122	HOL (<6)	MV99-MC19	Marchitto et al. (2007)	31.25	Extreme depletions	0	0	0
23.5	-111.6	705	1290	400	C	NaN	NaN	2320	35	NaN	NaN	1353	906	362.5	1407	3	122	HOL (<6)	MV99-MC19	Marchitto et al. (2007)	30.042	Extreme depletions	0	0	0
23.5	-111.6	705	10810	200	C	NaN	NaN	10460	30	NaN	NaN	9587	912	128.5	1407	3	123	EHOL (7-11)	MV99-PC08	Marchitto et al. (2007)	29.4118	Extreme depletions	0	0	0
23.5	-111.6	705	11320	200	C	NaN	NaN	10845	30	NaN	NaN	9945	900	145	1407	3	123		MV99-PC08	Marchitto et al. (2007)	31.25	Extreme depletions	0	0	0
23.5	-111.6	705	12120	200	C	NaN	NaN	13380	35	NaN	NaN	10360	3035	103	1407	3	123	YD (11.8-12.7)	MV99-PC08	Marchitto et al. (2007)	32.8947	Extreme depletions	0	0	0
23.5	-111.6	705	12880	100	C	NaN	NaN	13530	30	NaN	NaN	10965	2543	96	1407	3	123	BA (12.8-14.8)	MV99-PC08	Marchitto et al. (2007)	28.9855	Extreme depletions	0	0	0
23.5	-111.6	705	13570	100	C	NaN	NaN	13420	25	NaN	NaN	11663	1686	104	1407	3	123	BA (12.8-14.8)	MV99-PC08	Marchitto et al. (2007)	29.7297	Extreme depletions	0	0	0
23.5	-111.6	705	13940	100	C	NaN	NaN	14285	35	NaN	NaN	12020	2243	107	1407	3	123	BA (12.8-14.8)	MV99-PC08	Marchitto et al. (2007)	34.6154	Extreme depletions	0	0	0
23.5	-111.6	705	14200	200	C	NaN	NaN	13370	30	NaN	NaN	12302	1076	131.5	1407	3	123	BA (12.8-14.8)	MV99-PC08	Marchitto et al. (2007)	38.2353	Extreme depletions	0	0	0
23.5	-111.6	705	14370	200	C	NaN	NaN	14485	35	NaN	NaN	12398	2106	101	1407	3	123	BA (12.8-14.8)	MV99-PC08	Marchitto et al. (2007)	35.7143	Extreme depletions	0	0	0
23.5	-111.6	705	14650	100	C	NaN	NaN	15755	40	NaN	NaN	12480	3308	63.25	1407	3	123	BA (12.8-14.8)	MV99-PC08	Marchitto et al. (2007)	29.0323	Extreme depletions	0	0	0
23.5	-111.6	705	14960	200	C	NaN	NaN	15850	40	NaN	NaN	12553	3288	138	1407	3	123		MV99-PC08	Marchitto et al. (2007)	27.9412	Extreme depletions	0	0	0
23.5	-111.6	705	15300	300	C	NaN	NaN	16505	40	NaN	NaN	12836	3671	211	1407	3	123	HS1 (15-17.5)	MV99-PC08	Marchitto et al. (2007)	28.3784	Extreme depletions	0	0	0
23.5	-111.6	705	15670	300	C	NaN	NaN	16785	45	NaN	NaN	13074	3706	215	1407	3	123	HS1 (15-17.5)	MV99-PC08	Marchitto et al. (2007)	28.5714	Extreme depletions	0	0	0
23.5	-111.6	705	16020	300	C	NaN	NaN	16665	40	NaN	NaN	13326	3334	213	1407	3	123	HS1 (15-17.5)	MV99-PC08	Marchitto et al. (2007)	28.5714	Extreme depletions	0	0	0
23.5	-111.6	705	16370	300	C	NaN	NaN	16425	45	NaN	NaN	13581	2848	197.75	1407	3	123	HS1 (15-17.5)	MV99-PC08	Marchitto et al. (2007)	27.7778	Extreme depletions	0	0	0
23.5	-111.6	705	16730	300	C	NaN	NaN	16390	40	NaN	NaN	13804	2589	214	1407	3	123	HS1 (15-17.5)	MV99-PC08	Marchitto et al. (2007)	28.5714	Extreme depletions	0	0	0
23.5	-111.6	705	17080	300	C	NaN	NaN	16425	50	NaN	NaN	14080	2359	219.25	1407	3	123	HS1 (15-17.5)	MV99-PC08	Marchitto et al. (2007)	28.5714	Extreme depletions	0	0	0
23.5	-111.6	705	17430	300	C	NaN	NaN	16185	45	NaN	NaN	14377	1816	219.75	1407	3	123	HS1 (15-17.5)	MV99-PC08	Marchitto et al. (2007)	28.5714	Extreme depletions	0	0	0
23.5	-111.6	705	17780	300	C	NaN	NaN	16235	40	NaN	NaN	14497	1706	206.25	1407	3	123	HS1 (15-17.5)	MV99-PC08	Marchitto et al. (2007)	30.8824	Extreme depletions	0	0	0
23.5	-111.6	705	18120	300	C	NaN	NaN	16810	40	NaN	NaN	14729	2051	243.5	1407	3	123		MV99-PC08	Marchitto et al. (2007)	31.0345	Extreme depletions	0	0	0
23.5	-111.6	705	18410	300	C	NaN	NaN	16680	40	NaN	NaN	15242	1519	308	1407	3	123		MV99-PC08	Marchitto et al. (2007)	31.3187	Extreme depletions	0	0	0
23.5	-111.6	705	21140	200	C	NaN	NaN	19720	60	NaN	NaN	17543	2185	174.75	1407	3	123	LGM (19-21.8)	MV99-PC08	Marchitto et al. (2007)	31.746	Extreme depletions	0	0	0
23.5	-111.6	705	21770	300	C	NaN	NaN	19640	60	NaN	NaN	17853	1760	224.5	1407	3	123	LGM (19-21.8)	MV99-PC08	Marchitto et al. (2007)	31.129	Extreme depletions	0	0	0
23.5	-111.6	705	22390	300	C	NaN	NaN	19650	80	NaN	NaN	18470	1158	298.75	1407	3	123		MV99-PC08	Marchitto et al. (2007)	31.4423	Extreme depletions	0	0	0
23.5	-111.6	705	23430	100	C	NaN	NaN	21170	70	NaN	NaN	19539	1676	110.5	1407	3	123		MV99-PC08	Marchitto et al. (2007)	26.1628	Extreme depletions	0	0	0
23.5	-111.6	705	25150	300	C	NaN	NaN	22260	70	NaN	NaN	20840	1400	243	1407	3	123	preLGM (25-30)	MV99-PC08	Marchitto et al. (2007)	25.3247	Extreme depletions	0	0	0
23.5	-111.6	705	29000	200	C	NaN	NaN	25500	170	NaN	NaN	24723	745	297.75	1407	3	123	preLGM (25-30)	MV99-PC08	Marchitto et al. (2007)	26.0116	Extreme depletions	0	0	0
23.5	-111.6	705	30730	200	C	NaN	NaN	27200	130	NaN	NaN	26326	804	244.75	1407	3	123		MV99-PC08	Marchitto et al. (2007)	29.4118	Extreme depletions	0	0	0
23.5	-111.6	705	33110	200	C	NaN	NaN	29230	160	NaN	NaN	28686	532	248.5	1407	3	123		MV99-PC08	Marchitto et al. (2007)	24.3056	Extreme depletions	0	0	0
23.5	-111.6	705	34550	200	C	NaN	NaN	30830	170	NaN	NaN	30172	642	345	1407	3	123		MV99-PC08	Marchitto et al. (2007)	26.7857	Extreme depletions	0	0	0
23.5	-111.6	705	35110	200	C	NaN	NaN	30915	190	NaN	NaN	30630	208	80.5	1407	3	123		MV99-PC08	Marchitto et al. (2007)	25.641	Extreme depletions	0	0	0
23.5	-111.6	705	35890	200	C	NaN	NaN	31475	280	NaN	NaN	31448	13	-17.25	1407	3	123		MV99-PC08	Marchitto et al. (2007)	24.6305	Extreme depletions	0	0	0
23.5	-111.6	705	37920	200	C	NaN	NaN	34400	260	NaN	NaN	33355	1059	283.25	1407	3	123		MV99-PC08	Marchitto et al. (2007)	28.7711	Extreme depletions	0	0	0
49.3667	152.883	1765	9650	71	TS	9630	50	10450	70	820	86	8693	1736	99.25	2081	3	124	EHOL (7-11)	LV29-114-3	Max et al. (2014)	20.4145		1	1	1
49.3667	152.883	1765	10833	86	TS	10465	50	11200	75	735	90	9598.4	1630	93	2081	3	124	EHOL (7-11)	LV29-114-3	Max et al. (2014)	21.416		1	1	1
49.3667	152.883	1765	13113	54	TS	12290	55	12900	85	610	101	11220	1703	124.25	2081	3	124	BA (12.8-14.8)	LV29-114-3	Max et al. (2014)	20.7428		1	1	1
49.3667	152.883	1765	14147	89	TS	13180	60	14000	95	820	112	12259	1748	130.75	2081	3	124	BA (12.8-14.8)	LV29-114-3	Max et al. (2014)	20.6404		1	1	1
49.3667	152.883	1765	15953	105	TS	14400	80	14750	130	350	153	13270	1470	149.25	2081	3	124	HS1 (15-17.5)	LV29-114-3	Max et al. (2014)	19.8709		1	1	1
49.3667	152.883	1765	16890	94	TS	15130	80	16600	120	1470	144	13862	2724	139.5	2081	3	124	HS1 (15-17.5)	LV29-114-3	Max et al. (2014)	20.8407		1	1	1
52.7167	144.7	713	14532	176	S	13390	100	13760	60	370	117	12436	1338	86.5	1656	3	125	BA (12.8-14.8)	SO178-13-6	Max et al. (2014)	142.616		1	1	1
52.7167	144.7	713	15985	61	S	14420	45	14580	60	160	75	13296	1280	80.5	1656	3	125	HS1 (15-17.5)	SO178-13-6	Max et al. (2014)	140.788		1	1	1
52.7167	144.7	713	16850	73	S	15090	60	15470	60	380	85	13844	1620	77.5	1656	3	125	HS1 (15-17.5)	SO178-13-6	Max et al. (2014)	139.021		1	1	1
58.8667	170.683	630	13653	63	S	12600	55	12850	95	250	110	11819	1040	112.75	1481	3	126	BA (12.8-14.8)	SO201-2-101KL	Max et al. (2014)	0.73244	Low sed rate <2cm/kyr *	0	1	0
58.8667	170.683	630	16918	68	S	14950	60	16800	130	1850	143	13878	2911	141.5	1481	3	126	HS1 (15-17.5)	SO201-2-101KL	Max et al. (2014)	5.31978		1	1	0
58.8667	170.683	630	19629	147	S	17310	120	18630	200	1320	233	16358	2340	238.75	1481	3	126	LGM (19-21.8)	SO201-2-101KL	Max et al. (2014)	5.60395		1	1	0
53.9833	162.367	2145	11266	83	S	10800	65	11750	50	950	82	9903.2	1863	116.25	2140	3	127		SO201-2-12KL	Max et al. (2014)	30.1793		1	1	1
53.9833	162.367	2145	13321	55	S	12500	50	13500	55	1000	74	11466	2047	84.25	2140	3	127	BA (12.8-14.8)	SO201-2-12KL	Max et al. (2014)	38.1353		1	1	1
53.9833	162.367	2145	13771	74	S	12900	50	13850	50	950	71	11889	1949	96	2140	3	127	BA (12.8-14.8)	SO201-2-12KL	Max et al. (2014)	39.939		1	1	1
53.9833	162.367	2145	15291	74	S	13900	55	15300	95	1400	110	12826	2476	116.5	2140	3	127	HS1 (15-17.5)	SO201-2-12KL	Max et al. (2014)	45.4516		1	1	1
56.3167	170.683	2135	11115	41	S	10450	40	11650	45	1200	60	9658	2005	67	2175	3	128		SO201-2-77KL	Max et al. (2014)	10.3464		1	1	1
56.3167	170.683	2135	12579	45	S	11500	50	13000	70	1500	86	10473	2481	84.75	2175	3	128	YD (11.8-12.7)	SO201-2-77KL	Max et al. (2014)	12.3221		1	1	1
56.3167	170.683	2135	14567	101	S	13200	45	14450	85	1250	96	12453	2010	93.5	2175	3	128	BA (12.8-14.8)	SO201-2-77KL	Max et al. (2014)	12.3567		1	1	1
57.5	170.4	968	11110	70	S	10450	55	11250	110	800	123	9653	1606	135.5	1811	3	129		SO201-2-85KL	Max et al. (2014)	3.87039		1	1	0
57.5	170.4	968	15489	105	S	13850	80	14050	80	200	113	12931	1106	109	1811	3	129	HS1 (15-17.5)	SO201-2-85KL	Max et al. (2014)	6.00426		1	1	0
57.5	170.4	968	19674	80	S	17350	65	19210	90	1860	111	16384	2862	115.75	1811	3	129	LGM (19-21.8)	SO201-2-85KL	Max et al. (2014)	6.86185		1	1	0
60.1167	-179.433	1100	11657	40	S	10850	25	11300	50	450	56	10097	1231	58.25	1971	3	130		SO202-18-6	Max et al. (2014)	35.6009		1	1	1
60.1167	-179.433	1100	11802	81	S	10950	55	11550	60	600	81	10121	1395	83.75	1971	3	130	YD (11.8-12.7)	SO202-18-6	Max et al. (2014)	36.604		1	1	1
60.1167	-179.433	1100	12116.5	111	S	11150	65	11800	60	650	88	10368	1451	77.5	1971	3	130	YD (11.8-12.7)	SO202-18-6	Max et al. (2014)	42.2564		1	1	1
60.1167	-179.433	1100	12866	63	S	11850	60	12300	80	450	100	10969	1328	102.75	1971	3	130	BA (12.8-14.8)	SO202-18-6	Max et al. (2014)	46.0127		1	1	1
48.91	-126.9	920	10013	97	TS	9760	70	10680	54.0833	920	88	8895.4	1796.17	75.25	1726	3	131	EHOL (7-11)	JT96-09	McKay et al. (2005)	4.74383		1	1	0
48.91	-126.9	920	12463	134	TS	11500	110	12110	80	610	136	10403	1663	128	1726	3	131	YD (11.8-12.7)	JT96-09	McKay et al. (2005)	7.02078		1	1	0
48.91	-126.9	920	13079	122	TS	12460	120	13170	100	710	156	11098	2019	166.75	1726	3	131	BA (12.8-14.8)	JT96-09	McKay et al. (2005)	8.60158		1	1	0
48.91	-126.9	920	13259	87	TS	12640	90	13500	80	860	120	11396	2115	130.25	1726	3	131	BA (12.8-14.8)	JT96-09	McKay et al. (2005)	10.7474		1	1	1
48.91	-126.9	920	14205	131	TS	13410	80	14290	110	880	136	12305	2000	151.75	1726	3	131	BA (12.8-14.8)	JT96-09	McKay et al. (2005)	18.409		1	1	1
48.91	-126.9	920	14398	146	TS	13520	70	14350	120	830	139	12396	1963	136.25	1726	3	131	BA (12.8-14.8)	JT96-09	McKay et al. (2005)	19.8986		1	1	1
48.91	-126.9	920	15345	92	TS	14140	70	14830	280	690	289	12878	1969	283.75	1726	3	131	HS1 (15-17.5)	JT96-09	McKay et al. (2005)	22.5806		1	1	1
48.9	-126.9	920	10430	200	NA	9760	70	10680	90	920	114	9252	1423	197.75	1726	3	132	EHOL (7-11)	JT96-09PC	McKay et al. (2005)	4.95652		1	1	0
48.9	-126.9	920	10555.5	379.75	NA	9360	240	10910	70	1550	250	9319.7	1553	271.25	1726	3	132	EHOL (7-11)	JT96-09PC	McKay et al. (2005)	41.0256		1	1	1
48.9	-126.9	920	11425	348.5	NA	11500	110	12110	80	610	136	10037	2122	232.25	1726	3	132		JT96-09PC	McKay et al. (2005)	34.0909		1	1	1
48.9	-126.9	920	12115	324.75	NA	12460	120	13170	100	710	156	10371	2841	208.5	1726	3	132	YD (11.8-12.7)	JT96-09PC	McKay et al. (2005)	50.4626		1	1	1
48.9	-126.9	920	12709.5	316.625	NA	12640	90	13500	80	860	120	10676	2761	303.75	1726	3	132		JT96-09PC	McKay et al. (2005)	67.9694		1	1	1
48.9	-126.9	920	14468	311.625	NA	13410	80	14290	110	880	136	12409	1897	196.5	1726	3	132	BA (12.8-14.8)	JT96-09PC	McKay et al. (2005)	78.6163		1	1	1
48.9	-126.9	920	14786	321.75	NA	13520	70	14350	120	830	139	12391	1853	204.75	1726	3	132		JT96-09PC	McKay et al. (2005)	72.6392		1	1	1
48.9	-126.9	920	15612	366	NA	14140	70	14830	280	690	289	13023	1786	374.25	1726	3	132	HS1 (15-17.5)	JT96-09PC	McKay et al. (2005)	72.6392		1	1	1
40.4	143.5	2215	76.2533	29.9123	NA	NaN	NaN	2280	40	NaN	NaN	129.75	2158	43.25	2131	3	133	HOL (<6)	KR02-15-PC6	Minoshima et al. (2007)	74.7508		1	1	1
40.4	143.5	2215	593.973	63.2642	NA	NaN	NaN	2720	50	NaN	NaN	607.13	2109	121	2131	3	133	HOL (<6)	KR02-15-PC6	Minoshima et al. (2007)	74.7508		1	1	1
40.4	143.5	2215	1292.29	108.25	NA	NaN	NaN	3400	50	NaN	NaN	1362.2	2027	129.5	2131	3	133	HOL (<6)	KR02-15-PC6	Minoshima et al. (2007)	99.2352		1	1	1
40.4	143.5	2215	2300	200	NA	NaN	NaN	4170	30	NaN	NaN	2211	1911	143.25	2131	3	133	HOL (<6)	KR02-15-PC6	Minoshima et al. (2007)	132.5		1	1	1
40.4	143.5	2215	2660	200	NA	NaN	NaN	4470	40	NaN	NaN	2446	1955	18	2131	3	133	HOL (<6)	KR02-15-PC6	Minoshima et al. (2007)	41.6326		1	1	1
40.4	143.5	2215	3640	200	NA	NaN	NaN	5270	50	NaN	NaN	3405	1865	173.75	2131	3	133	HOL (<6)	KR02-15-PC6	Minoshima et al. (2007)	51.931		1	1	1
40.4	143.5	2215	4816	335.25	NA	5170	60	6650	50	1480	78	4172	2406	244	2131	3	133	HOL (<6)	KR02-15-PC6	Minoshima et al. (2007)	36.3706		1	1	1
40.4	143.5	2215	5047	86	TS	5170	60	6650	50	1480	78	4458.6	2194	72.25	2131	3	133	HOL (<6)	KR02-15-PC6	Minoshima et al. (2007)	71.3295		1	1	1
40.4	143.5	2215	6372.2	325.85	NA	NaN	NaN	7610	10	NaN	NaN	5574.8	2004	23	2131	3	133		KR02-15-PC6	Minoshima et al. (2007)	36.2076		1	1	1
40.4	143.5	2215	7154	94	TS	7070	90	8530	60	1460	108	6171	2299	103	2131	3	133	EHOL (7-11)	KR02-15-PC6	Minoshima et al. (2007)	63.0696		1	1	1
40.4	143.5	2215	7327.8	255.5	NA	7070	90	8530	60	1460	108	6428.4	2114	261	2131	3	133	EHOL (7-11)	KR02-15-PC6	Minoshima et al. (2007)	29.655		1	1	1
40.4	143.5	2215	8062	59	TS	8010	60	9040	80	1030	100	7322.4	1761	104.5	2131	3	133	EHOL (7-11)	KR02-15-PC6	Minoshima et al. (2007)	59.613		1	1	1
40.4	143.5	2215	8319.2	297.45	NA	8010	60	9040	80	1030	100	7451.7	1528	288	2131	3	133	EHOL (7-11)	KR02-15-PC6	Minoshima et al. (2007)	19.0644		1	1	1
40.4	143.5	2215	11387	123	TS	10610	90	11840	60	1230	108	9949	1860	118	2131	3	133		KR02-15-PC6	Minoshima et al. (2007)	47.3522		1	1	1
40.4	143.5	2215	11393	300.2	NA	10610	90	11840	60	1230	108	9968.2	1862	202.75	2131	3	133		KR02-15-PC6	Minoshima et al. (2007)	20.0352		1	1	1
40.4	143.5	2215	11771	111	TS	10860	70	12490	110	1630	130	10149	2353	130	2131	3	133	YD (11.8-12.7)	KR02-15-PC6	Minoshima et al. (2007)	47.1583		1	1	1
40.4	143.5	2215	11847.2	301.35	NA	NaN	NaN	12100	60	NaN	NaN	10205	1907	153.75	2131	3	133	YD (11.8-12.7)	KR02-15-PC6	Minoshima et al. (2007)	19.5402		1	1	1
40.4	143.5	2215	12195.2	299.425	NA	10860	70	12490	110	1630	130	10391	2131	213.25	2131	3	133	YD (11.8-12.7)	KR02-15-PC6	Minoshima et al. (2007)	12.5207		1	1	1
40.4	143.5	2215	12738.3	379.2	NA	NaN	NaN	13590	80	NaN	NaN	10776	2768	349.75	2131	3	133		KR02-15-PC6	Minoshima et al. (2007)	11.4171		1	1	1
40.4	143.5	2215	13333.9	418.35	NA	NaN	NaN	14050	80	NaN	NaN	11480	2562	57.5	2131	3	133	BA (12.8-14.8)	KR02-15-PC6	Minoshima et al. (2007)	11.9563		1	1	1
40.4	143.5	2215	13911	407.25	NA	13470	70	14500	120	1030	139	12061	2458	334.5	2131	3	133	BA (12.8-14.8)	KR02-15-PC6	Minoshima et al. (2007)	22.5207		1	1	1
40.4	143.5	2215	14395	405.25	NA	13530	70	14890	70	1360	99	12396	2517	252.75	2131	3	133	BA (12.8-14.8)	KR02-15-PC6	Minoshima et al. (2007)	4.93506		1	1	0
40.4	143.5	2215	15088	87	TS	13470	70	14500	120	1030	139	12648	1843	140	2131	3	133	HS1 (15-17.5)	KR02-15-PC6	Minoshima et al. (2007)	38.1495		1	1	1
40.4	143.5	2215	15164	89	TS	13530	70	14890	70	1360	99	12718	2173	105.75	2131	3	133	HS1 (15-17.5)	KR02-15-PC6	Minoshima et al. (2007)	38.6771		1	1	1
40.4	143.5	2215	18630	200	NA	12900	700	17160	90	4260	706	15210	1878	229	2131	3	133		KR02-15-PC6	Minoshima et al. (2007)	11.4957		1	1	1
40.4	143.5	2215	25650	200	NA	NaN	NaN	23100	60	NaN	NaN	21219	1857	250.25	2131	3	133	preLGM (25-30)	KR02-15-PC6	Minoshima et al. (2007)	40.3846		1	1	1
40.4	143.5	2215	26950	200	NA	NaN	NaN	24230	70	NaN	NaN	22506	1700	233.75	2131	3	133	preLGM (25-30)	KR02-15-PC6	Minoshima et al. (2007)	40.3846		1	1	1
43.05	-30.0333	3080	2084	200	NA	3097	55	2783	56	-314	78	2109	662	172.75	715	1	134	HOL (<6)	SU90-08	Missiaen et al. (2020) in Radiocarbon	1.43954	Bioturbation issues, Low sed rate <2cm/kyr, negative B-P	0	0	0
43.05	-30.0333	3080	2084	200	NA	NaN	NaN	3302	58	NaN	NaN	2109	1181	173.5	715	1	134	HOL (<6)	SU90-08	Missiaen et al. (2020) in Radiocarbon	4.87805	Bioturbation issues	0	0	0
43.05	-30.0333	3080	2084	200	NA	3407	61	3460	31	53	68	2109	1339	127	715	1	134	HOL (<6)	SU90-08	Missiaen et al. (2020) in Radiocarbon	1.43954	Bioturbation issues, Low sed rate <2cm/kyr	0	0	0
43.05	-30.0333	3080	2494	200	NA	NaN	NaN	3289	22	NaN	NaN	2464	837	126.75	715	1	134	HOL (<6)	SU90-08	Missiaen et al. (2020) in Radiocarbon	4.88998	Bioturbation issues	0	0	0
43.05	-30.0333	3080	3312	200	NA	3319	56	2763	69	-556	89	3044	-335	174.25	715	1	134	HOL (<6)	SU90-08	Missiaen et al. (2020) in Radiocarbon	4.88599	Bioturbation issues, negative B-Atm, negative B-P	0	0	0
43.05	-30.0333	3080	3312	200	NA	3564	60	3059	34	-505	69	3044	-31	162.75	715	1	134	HOL (<6)	SU90-08	Missiaen et al. (2020) in Radiocarbon	4.88998	Bioturbation issues, negative B-Atm, negative B-P	0	0	0
43.05	-30.0333	3080	4540	200	NA	NaN	NaN	4215	35	NaN	NaN	4090	144	127.75	715	1	134	HOL (<6)	SU90-08	Missiaen et al. (2020) in Radiocarbon	4.77327	Bioturbation issues	0	0	0
43.05	-30.0333	3080	4959	200	NA	4760	62	4342	64	-418	89	4381	-55	157	715	1	134	HOL (<6)	SU90-08	Missiaen et al. (2020) in Radiocarbon	4.77327	Bioturbation issues, negative B-Atm, negative B-P	0	0	0
43.05	-30.0333	3080	4959	200	NA	4558	61	4391	24	-167	66	4381	-11	128.5	715	1	134	HOL (<6)	SU90-08	Missiaen et al. (2020) in Radiocarbon	4.77327	Bioturbation issues, negative B-Atm, negative B-P	0	0	0
43.05	-30.0333	3080	4959	200	NA	NaN	NaN	4842	64	NaN	NaN	4381	445	157	715	1	134	HOL (<6)	SU90-08	Missiaen et al. (2020) in Radiocarbon	3.57569	Bioturbation issues	0	0	0
43.05	-30.0333	3080	6637	200	NA	6520	70	5373	64	-1147	95	5809.8	-456	189.75	715	1	134		SU90-08	Missiaen et al. (2020) in Radiocarbon	3.57569	Bioturbation issues, negative B-Atm, negative B-P	0	0	0
43.05	-30.0333	3080	6637	200	NA	5845	69	5954	29	109	75	5809.8	132	5.25	715	1	134		SU90-08	Missiaen et al. (2020) in Radiocarbon	3.57569	Bioturbation issues	0	0	0
43.05	-30.0333	3080	6637	200	NA	NaN	NaN	6651	69	NaN	NaN	5809.8	821	191.25	715	1	134		SU90-08	Missiaen et al. (2020) in Radiocarbon	3.38409	Bioturbation issues	0	0	0
43.05	-30.0333	3080	7228	200	NA	NaN	NaN	6245	28	NaN	NaN	6256.4	-63	184.5	715	1	134	EHOL (7-11)	SU90-08	Missiaen et al. (2020) in Radiocarbon	3.37724	Bioturbation issues, negative B-Atm	0	0	0
43.05	-30.0333	3080	10189	200	NA	9372	89	8668	32	-704	95	8983.4	-326	150.25	715	1	134	EHOL (7-11)	SU90-08	Missiaen et al. (2020) in Radiocarbon	3.37724	Bioturbation issues, negative B-Atm, negative B-P	0	0	0
43.05	-30.0333	3080	10189	200	NA	9320	82	8703	86	-617	119	8983.4	-314	175.75	715	1	134	EHOL (7-11)	SU90-08	Missiaen et al. (2020) in Radiocarbon	3.37724	Bioturbation issues, negative B-Atm, negative B-P	0	0	0
43.05	-30.0333	3080	10189	200	NA	NaN	NaN	9067	88	NaN	NaN	8983.4	50	176.75	715	1	134	EHOL (7-11)	SU90-08	Missiaen et al. (2020) in Radiocarbon	4.03633	Bioturbation issues	0	0	0
43.05	-30.0333	3080	11180	200	NA	NaN	NaN	9636	83	NaN	NaN	9708	-110	173	715	1	134	EHOL (7-11)	SU90-08	Missiaen et al. (2020) in Radiocarbon	4.1841	Bioturbation issues, negative B-Atm	0	0	0
43.05	-30.0333	3080	11180	200	NA	10340	40	10226	85	-114	94	9708	480	174.25	715	1	134	EHOL (7-11)	SU90-08	Missiaen et al. (2020) in Radiocarbon	4.03633	Bioturbation issues, negative B-P	0	0	0
43.05	-30.0333	3080	11658	200	NA	11501	94	10412	86	-1089	127	10097	327	137.75	715	1	134	YD (11.8-12.7)	SU90-08	Missiaen et al. (2020) in Radiocarbon	4.1841	Bioturbation issues, negative B-P	0	0	0
43.05	-30.0333	3080	11658	200	NA	NaN	NaN	10669	37	NaN	NaN	10097	592	113	715	1	134	YD (11.8-12.7)	SU90-08	Missiaen et al. (2020) in Radiocarbon	5.88235	Bioturbation issues	0	0	0
43.05	-30.0333	3080	11658	200	NA	NaN	NaN	10841	84	NaN	NaN	10097	757	136.75	715	1	134	YD (11.8-12.7)	SU90-08	Missiaen et al. (2020) in Radiocarbon	4.1841	Bioturbation issues	0	0	0
43.05	-30.0333	3080	12338	200	NA	11749	97	11285	96	-464	136	10423	880	148	715	1	134	YD (11.8-12.7)	SU90-08	Missiaen et al. (2020) in Radiocarbon	5.88235	Bioturbation issues, negative B-P	0	0	0
43.05	-30.0333	3080	12338	200	NA	11482	94	11293	92	-189	132	10423	889	145.25	715	1	134	YD (11.8-12.7)	SU90-08	Missiaen et al. (2020) in Radiocarbon	5.88235	Bioturbation issues, negative B-P	0	0	0
43.05	-30.0333	3080	12338	200	NA	NaN	NaN	11575	45	NaN	NaN	10423	1179	118.5	715	1	134	YD (11.8-12.7)	SU90-08	Missiaen et al. (2020) in Radiocarbon	6.32911	Bioturbation issues	0	0	0
43.05	-30.0333	3080	13128	200	NA	11811	96	11807	98	-4	137	11256	579	240	715	1	134	BA (12.8-14.8)	SU90-08	Missiaen et al. (2020) in Radiocarbon	6.32911	Bioturbation issues, negative B-P	0	0	0
43.05	-30.0333	3080	13128	200	NA	11913	95	11899	93	-14	133	11256	671	237.75	715	1	134	BA (12.8-14.8)	SU90-08	Missiaen et al. (2020) in Radiocarbon	6.32911	Bioturbation issues, negative B-P	0	0	0
43.05	-30.0333	3080	13128	200	NA	NaN	NaN	11938	44	NaN	NaN	11256	702	220.75	715	1	134	BA (12.8-14.8)	SU90-08	Missiaen et al. (2020) in Radiocarbon	7.16846	Bioturbation issues	0	0	0
43.05	-30.0333	3080	13407	200	NA	12460	109	11559	96	-901	145	11521	13	240	715	1	134	BA (12.8-14.8)	SU90-08	Missiaen et al. (2020) in Radiocarbon	7.16846	Bioturbation issues, negative B-P	0	0	0
43.05	-30.0333	3080	13407	200	NA	12675	96	12261	97	-414	136	11521	715	240.25	715	1	134	BA (12.8-14.8)	SU90-08	Missiaen et al. (2020) in Radiocarbon	7.8329	Bioturbation issues, negative B-P	0	0	0
43.05	-30.0333	3080	13790	200	NA	12563	105	11632	91	-931	139	11918	-300	207.5	715	1	134	BA (12.8-14.8)	SU90-08	Missiaen et al. (2020) in Radiocarbon	7.8329	Bioturbation issues, negative B-Atm, negative B-P	0	0	0
43.05	-30.0333	3080	13790	200	NA	12154	45	11898	98	-256	108	11918	-33	210.25	715	1	134	BA (12.8-14.8)	SU90-08	Missiaen et al. (2020) in Radiocarbon	9.31677	Bioturbation issues, negative B-Atm, negative B-P	0	0	0
43.05	-30.0333	3080	14434	200	NA	13548	113	13110	104	-438	154	12400	718	137	715	1	134	BA (12.8-14.8)	SU90-08	Missiaen et al. (2020) in Radiocarbon	9.31677	Bioturbation issues, negative B-P	0	0	0
43.05	-30.0333	3080	14434	200	NA	13782	105	13163	107	-619	150	12400	771	139.25	715	1	134	BA (12.8-14.8)	SU90-08	Missiaen et al. (2020) in Radiocarbon	13.1703	Bioturbation issues, negative B-P	0	0	0
43.05	-30.0333	3080	15497	200	NA	NaN	NaN	16627	155	NaN	NaN	12934	3671	208.75	715	1	134	HS1 (15-17.5)	SU90-08	Missiaen et al. (2020) in Radiocarbon	5.61798	Bioturbation issues	0	0	0
43.05	-30.0333	3080	15497	200	NA	NaN	NaN	16805	158	NaN	NaN	12934	3849	210.75	715	1	134	HS1 (15-17.5)	SU90-08	Missiaen et al. (2020) in Radiocarbon	13.1703	Bioturbation issues	0	0	0
43.05	-30.0333	3080	16209	200	NA	NaN	NaN	16467	143	NaN	NaN	13443	3011	198.25	715	1	134	HS1 (15-17.5)	SU90-08	Missiaen et al. (2020) in Radiocarbon	4.70588	Bioturbation issues	0	0	0
43.05	-30.0333	3080	16634	200	NA	NaN	NaN	17302	159	NaN	NaN	13751	3561	202.5	715	1	134	HS1 (15-17.5)	SU90-08	Missiaen et al. (2020) in Radiocarbon	4.36681	Bioturbation issues	0	0	0
43.05	-30.0333	3080	16634	200	NA	16677	56	17915	159	1238	169	13751	4174	202.5	715	1	134	HS1 (15-17.5)	SU90-08	Missiaen et al. (2020) in Radiocarbon	4.70588	Bioturbation issues	0	0	0
43.05	-30.0333	3080	17550	200	NA	17400	156	18515	168	1115	229	14461	4096	215.25	715	1	134	HS1 (15-17.5)	SU90-08	Missiaen et al. (2020) in Radiocarbon	4.30107	Bioturbation issues	0	0	0
43.05	-30.0333	3080	18945	200	NA	18432	164	19143	183	711	246	15712	3456	286.25	715	1	134	LGM (19-21.8)	SU90-08	Missiaen et al. (2020) in Radiocarbon	4.8216	Bioturbation issues	0	0	0
43.05	-30.0333	3080	18945	200	NA	18515	168	19470	182	955	248	15712	3783	285.75	715	1	134	LGM (19-21.8)	SU90-08	Missiaen et al. (2020) in Radiocarbon	4.30107	Bioturbation issues	0	0	0
43.05	-30.0333	3080	19982	200	NA	18884	167	19692	187	808	251	16559	3146	239.25	715	1	134	LGM (19-21.8)	SU90-08	Missiaen et al. (2020) in Radiocarbon	5.0537	Bioturbation issues	0	0	0
43.05	-30.0333	3080	19982	200	NA	18972	172	19856	187	884	254	16559	3310	239.25	715	1	134	LGM (19-21.8)	SU90-08	Missiaen et al. (2020) in Radiocarbon	4.8216	Bioturbation issues	0	0	0
43.05	-30.0333	3080	21565	200	NA	19467	198	20663	202	1196	283	17807	2883	231.75	715	1	134	LGM (19-21.8)	SU90-08	Missiaen et al. (2020) in Radiocarbon	6.50289	Bioturbation issues	0	0	0
43.05	-30.0333	3080	22949	200	NA	20322	73	21117	214	795	226	18978	2098	304.25	715	1	134		SU90-08	Missiaen et al. (2020) in Radiocarbon	10.582	Bioturbation issues	0	0	0
43.05	-30.0333	3080	23327	200	NA	20823	213	21268	216	445	303	19401	1865	270.25	715	1	134		SU90-08	Missiaen et al. (2020) in Radiocarbon	10.8696	Bioturbation issues	0	0	0
43.05	-30.0333	3080	23511	200	NA	20954	218	21595	224	641	313	19558	2096	276.25	715	1	134		SU90-08	Missiaen et al. (2020) in Radiocarbon	15.8416	Bioturbation issues	0	0	0
43.05	-30.0333	3080	24016	200	NA	21429	85	22738	247	1309	261	20026	2723	333.5	715	1	134		SU90-08	Missiaen et al. (2020) in Radiocarbon	7.23327	Bioturbation issues	0	0	0
43.05	-30.0333	3080	24569	200	NA	21793	224	23072	257	1279	341	20415	2633	287.5	715	1	134		SU90-08	Missiaen et al. (2020) in Radiocarbon	5.89102	Bioturbation issues	0	0	0
43.05	-30.0333	3080	24569	200	NA	22454	249	23207	258	753	359	20415	2768	288.5	715	1	134		SU90-08	Missiaen et al. (2020) in Radiocarbon	7.23327	Bioturbation issues	0	0	0
43.05	-30.0333	3080	25248	200	NA	23044	260	21097	220	-1947	341	20975	141	280	715	1	134	preLGM (25-30)	SU90-08	Missiaen et al. (2020) in Radiocarbon	5.89102	Bioturbation issues, negative B-P	0	0	0
43.05	-30.0333	3080	25248	200	NA	22757	245	24185	292	1428	381	20975	3231	338	715	1	134	preLGM (25-30)	SU90-08	Missiaen et al. (2020) in Radiocarbon	5.6985	Bioturbation issues	0	0	0
41.68	-124.93	980	10260	149	TS	9950	110	10810	120	860	163	9173	1702	183.5	1736	3	135	EHOL (7-11)	ODP1019	Mix et al. (1999)	17.0565		1	1	1
41.68	-124.93	980	10596	181	TS	10210	120	11130	80	920	144	9413.2	1748	154.75	1736	3	135	EHOL (7-11)	ODP1019	Mix et al. (1999)	23.6882		1	1	1
41.68	-124.93	980	12308	207	TS	11410	170	11540	90	130	192	10370	1145	142.5	1736	3	135	YD (11.8-12.7)	ODP1019	Mix et al. (1999)	22.3432		1	1	1
41.68	-124.93	980	12535	158	TS	11580	140	13290	220	1710	261	10529	2772	271.25	1736	3	135	YD (11.8-12.7)	ODP1019	Mix et al. (1999)	27.1241		1	1	1
41.68	-124.93	980	12879	97	TS	11950	110	12830	90	880	142	10964	1851	145.25	1736	3	135	BA (12.8-14.8)	ODP1019	Mix et al. (1999)	29.5054		1	1	1
41.68	-124.93	980	14632	203	TS	13350	120	14260	140	910	184	12476	1819	157.25	1736	3	135	BA (12.8-14.8)	ODP1019	Mix et al. (1999)	32.5314		1	1	1
41.68	-124.93	980	16940	144	TS	15080	120	16210	190	1130	225	13892	2283	222.25	1736	3	135	HS1 (15-17.5)	ODP1019	Mix et al. (1999)	34.2385		1	1	1
41.68	-124.93	980	18099	165	TS	16040	140	17480	280	1440	313	14721	2699	338.25	1736	3	135		ODP1019	Mix et al. (1999)	39.3944		1	1	1
41.68	-124.93	980	21008	267	TS	18550	210	19080	190	530	283	17470	1653	281.5	1736	3	135	LGM (19-21.8)	ODP1019	Mix et al. (1999)	38.7471		1	1	1
41.68	-124.93	980	24069	329	TS	21240	280	23860	860	2620	904	20044	3818	898.5	1736	3	135		ODP1019	Mix et al. (1999)	40.467		1	1	1
42.12	-125.75	2710	10547	240	TS	9960	230	11580	170	1620	286	9314	2234	251.75	2252	3	136	EHOL (7-11)	W8709A-13PC	Mix et al. (1999)	11.9702		1	1	1
42.12	-125.75	2710	11365	110	TS	10720	70	12190	60	1470	92	9987	2220	116	2252	3	136		W8709A-13PC	Mix et al. (1999)	12.2305		1	1	1
42.12	-125.75	2710	12142	105	TS	11200	60	12630	60	1430	85	10357	2272	73.25	2252	3	136	YD (11.8-12.7)	W8709A-13PC	Mix et al. (1999)	12.6832		1	1	1
42.12	-125.75	2710	13827	86	TS	12760	60	14330	90	1570	108	12020	2354	124.75	2252	3	136	BA (12.8-14.8)	W8709A-13PC	Mix et al. (1999)	13.8497		1	1	1
42.12	-125.75	2710	14211	121	TS	13000	90	14700	250	1700	266	12308	2411	263.25	2252	3	136	BA (12.8-14.8)	W8709A-13PC	Mix et al. (1999)	13.9856		1	1	1
42.12	-125.75	2710	15210	97	TS	13700	70	14860	70	1160	99	12751	2105	110.25	2252	3	136	HS1 (15-17.5)	W8709A-13PC	Mix et al. (1999)	13.9711		1	1	1
42.12	-125.75	2710	15622	113	TS	14050	140	15950	180	1900	228	13033	2913	198.75	2252	3	136	HS1 (15-17.5)	W8709A-13PC	Mix et al. (1999)	14.1627		1	1	1
42.12	-125.75	2710	15785	129	TS	14020	140	15770	320	1750	349	13166	2608	329.25	2252	3	136	HS1 (15-17.5)	W8709A-13PC	Mix et al. (1999)	14.1748		1	1	1
42.12	-125.75	2710	18952	123	TS	16710	120	18360	200	1650	233	15719	2662	244	2252	3	136	LGM (19-21.8)	W8709A-13PC	Mix et al. (1999)	15.8954		1	1	1
42.12	-125.75	2710	19205.5	135	TS	17030	150	18630	180	1600	234	15948	2705	206.5	2252	3	136	LGM (19-21.8)	W8709A-13PC	Mix et al. (1999)	15.8158		1	1	1
42.12	-125.75	2710	24771.5	218	TS	22000	250	23560	1020	1560	1050	20570	2992	1011	2252	3	136		W8709A-13PC	Mix et al. (1999)	16.1981		1	1	1
42.12	-125.75	2710	24988	227	TS	21910	240	24540	510	2630	564	20694	3813	534.25	2252	3	136	preLGM (25-30)	W8709A-13PC	Mix et al. (1999)	16.1578		1	1	1
32.15	133.9	2700	10446	179	TS	9800	133	11140	159	1340	207	9283	1873	221.25	2001	3	137	EHOL (7-11)	KT89-18-P4	Murayama et al. (1992); Okazaki et al. (2010)	17.7101		1	1	1
32.15	133.9	2700	11707	169	TS	10692	108	12034	94	1342	143	10090	1928	130.25	2001	3	137	YD (11.8-12.7)	KT89-18-P4	Murayama et al. (1992); Okazaki et al. (2010)	17.0838		1	1	1
32.15	133.9	2700	12851	90	TS	11622	101	13350	238	1728	259	10989	2405	259.25	2001	3	137	BA (12.8-14.8)	KT89-18-P4	Murayama et al. (1992); Okazaki et al. (2010)	18.3643		1	1	1
32.15	133.9	2700	13711	116	TS	12450	91	14423	237	1973	254	11816	2565	259.25	2001	3	137	BA (12.8-14.8)	KT89-18-P4	Murayama et al. (1992); Okazaki et al. (2010)	19.5463		1	1	1
32.15	133.9	2700	15225	148	TS	13447	113	14681	103	1234	153	12762	1912	153.25	2001	3	137	HS1 (15-17.5)	KT89-18-P4	Murayama et al. (1992); Okazaki et al. (2010)	22.2003		1	1	1
32.15	133.9	2700	19821	538	TS	17275	478	19267	557	1992	734	16377	2825	704.25	2001	3	137	LGM (19-21.8)	KT89-18-P4	Murayama et al. (1992); Okazaki et al. (2010)	22.6527		1	1	1
32.15	133.9	2700	22645	323	TS	19655	303	21344	205	1689	366	18774	2602	391.5	2001	3	137		KT89-18-P4	Murayama et al. (1992); Okazaki et al. (2010)	23.5814		1	1	1
36.07	141.82	2101	2497	46	TS	3010	25	4560	35	1550	43	2476	2096	46.25	2096	3	138	HOL (<6)	MD01-2420	Okazaki et al. (2012)	28.0737		1	1	1
36.07	141.82	2101	8059	44	TS	7880	40	9020	50	1140	64	7321.6	1732	73.75	2096	3	138	EHOL (7-11)	MD01-2420	Okazaki et al. (2012)	28.9614		1	1	1
36.07	141.82	2101	10122	53	TS	9530	40	10800	65	1270	76	8890.2	1896	86	2096	3	138	EHOL (7-11)	MD01-2420	Okazaki et al. (2012)	29.5199		1	1	1
36.07	141.82	2101	11729	86	TS	10700	55	12100	50	1400	74	10091	1993	74.75	2096	3	138	YD (11.8-12.7)	MD01-2420	Okazaki et al. (2012)	28.9198		1	1	1
36.07	141.82	2101	12427	76	TS	11150	55	12400	65	1250	85	10356	1994	92.5	2096	3	138	YD (11.8-12.7)	MD01-2420	Okazaki et al. (2012)	28.4703		1	1	1
36.07	141.82	2101	12937	83	TS	11717	88	13050	60	1333	107	11047	2027	92.25	2096	3	138	BA (12.8-14.8)	MD01-2420	Okazaki et al. (2012)	28.6542		1	1	1
36.07	141.82	2101	13373	52	TS	12150	50	13450	65	1300	82	11523	1942	87.25	2096	3	138	BA (12.8-14.8)	MD01-2420	Okazaki et al. (2012)	28.6323		1	1	1
36.07	141.82	2101	13651	56	TS	12400	45	13750	55	1350	71	11816	1936	79.75	2096	3	138	BA (12.8-14.8)	MD01-2420	Okazaki et al. (2012)	28.5767		1	1	1
36.07	141.82	2101	14972	221	TS	13258	141	14600	60	1342	153	12566	2027	153.5	2096	3	138		MD01-2420	Okazaki et al. (2012)	27.0305		1	1	1
36.07	141.82	2101	15310	140	TS	13510	113	14750	55	1240	126	12846	1913	117.5	2096	3	138	HS1 (15-17.5)	MD01-2420	Okazaki et al. (2012)	27.3808		1	1	1
36.07	141.82	2101	15824	69	TS	13900	50	15250	60	1350	78	13197	2055	85.25	2096	3	138	HS1 (15-17.5)	MD01-2420	Okazaki et al. (2012)	27.2561		1	1	1
36.07	141.82	2101	16853	84	TS	14696	70	15850	65	1154	96	13845	1997	86	2096	3	138	HS1 (15-17.5)	MD01-2420	Okazaki et al. (2012)	26.7964		1	1	1
36.07	141.82	2101	18863	145	TS	16457	141	18000	75	1543	160	15594	2404	200.75	2096	3	138	LGM (19-21.8)	MD01-2420	Okazaki et al. (2012)	25.9344		1	1	1
36.07	141.82	2101	19507	56	TS	17020	50	18350	70	1330	86	16146	2197	111.25	2096	3	138	LGM (19-21.8)	MD01-2420	Okazaki et al. (2012)	25.842		1	1	1
36.07	141.82	2101	22527	72	TS	19555	60	21100	100	1545	117	18691	2417	142.25	2096	3	138		MD01-2420	Okazaki et al. (2012)	26.6436		1	1	1
44.53	145	1215	10716	86	TS	10400	50	11250	55	850	74	9482.8	1768	92.75	2021	3	139	EHOL (7-11)	MR06-04 PC04A	Okazaki et al. (2014)	107.549		1	1	1
44.53	145	1215	11256	51	TS	10800	45	11650	60	850	75	9882.4	1778	101.75	2021	3	139		MR06-04 PC04A	Okazaki et al. (2014)	106.423		1	1	1
44.53	145	1215	11480	78	TS	10950	45	11900	60	950	75	10019	1878	69.25	2021	3	139		MR06-04 PC04A	Okazaki et al. (2014)	105.427		1	1	1
44.53	145	1215	13024	60	TS	12200	60	13150	80	950	100	11061	2078	102.75	2021	3	139	BA (12.8-14.8)	MR06-04 PC04A	Okazaki et al. (2014)	97.973		1	1	1
44.53	145	1215	13903	56	TS	13000	45	13650	60	650	75	12066	1616	73.75	2021	3	139	BA (12.8-14.8)	MR06-04 PC04A	Okazaki et al. (2014)	93.4043		1	1	1
44.53	145	1215	18608	111	TS	16600	95	17350	65	750	115	15162	2127	140	2021	3	139		MR06-04 PC04A	Okazaki et al. (2014)	80.0892		1	1	1
51.75	-12.92	150	12590	200	C	11032	39	NaN	NaN	NaN	NaN	10494	482	118	396	1	140	YD (11.8-12.7)	MD02-2461	Peck et al., 2006	16.8065		1	1	1
51.75	-12.92	150	13304	200	C	12551	46	NaN	NaN	NaN	NaN	11413	1113	219.75	396	1	140	BA (12.8-14.8)	MD02-2461	Peck et al., 2006	19.1691		1	1	1
51.75	-12.92	150	15182	200	C	11950	43	NaN	NaN	NaN	NaN	12731	784	-150.25	396	1	140	HS1 (15-17.5)	MD02-2461	Peck et al., 2006	23.4451	Negative radcal error, poor convergence	0	0	0
51.75	-12.92	150	16546.9	200	C	14530	58	NaN	NaN	NaN	NaN	13684	839	140.5	396	1	140	HS1 (15-17.5)	MD02-2461	Peck et al., 2006	26.7052		1	1	1
51.75	-12.92	150	17520.5	200	C	15118	64	NaN	NaN	NaN	NaN	14452	699	153.5	396	1	140	HS1 (15-17.5)	MD02-2461	Peck et al., 2006	28.3265		1	1	1
51.75	-12.92	150	19426.8	200	C	15518	63	NaN	NaN	NaN	NaN	16055	558	-179	396	1	140	LGM (19-21.8)	MD02-2461	Peck et al., 2006	43.5194	Negative radcal error, poor convergence	0	0	0
51.75	-12.92	150	20254	200	C	15174	60	NaN	NaN	NaN	NaN	16739	1573	-183	396	1	140	LGM (19-21.8)	MD02-2461	Peck et al., 2006	29.1989	Negative radcal error, poor convergence	0	0	0
51.75	-12.92	150	20939	200	C	17130	77	NaN	NaN	NaN	NaN	17389	254	-109.5	396	1	140	LGM (19-21.8)	MD02-2461	Peck et al., 2006	28.4085	Negative radcal error, poor convergence	0	0	0
51.75	-12.92	150	21783.8	200	C	18233	87	NaN	NaN	NaN	NaN	17864	348	154.75	396	1	140	LGM (19-21.8)	MD02-2461	Peck et al., 2006	31.3253		1	1	1
51.75	-12.92	150	23108.6	200	C	18665	89	NaN	NaN	NaN	NaN	19257	583	-228.25	396	1	140		MD02-2461	Peck et al., 2006	51.8659	Negative radcal error, poor convergence	0	0	0
51.75	-12.92	150	24082.3	200	C	19128	94	NaN	NaN	NaN	NaN	20048	944	-241	396	1	140		MD02-2461	Peck et al., 2006	46.3903	Negative radcal error, poor convergence	0	0	0
51.75	-12.92	150	24987.6	200	C	20193	118	NaN	NaN	NaN	NaN	20694	515	-207	396	1	140	preLGM (25-30)	MD02-2461	Peck et al., 2006	42.355	Negative radcal error, poor convergence	0	0	0
51.75	-12.92	150	25743.2	200	C	20931	129	NaN	NaN	NaN	NaN	21361	440	-274	396	1	140	preLGM (25-30)	MD02-2461	Peck et al., 2006	42.355	Negative radcal error, poor convergence	0	0	0
57.6	-136.7	1620	13550	200	NA	12295	30	13280	30	985	42	11701	1564	195.75	2154	3	141	BA (12.8-14.8)	EW0408-26JC	Praetorius et al., 2020	104.706		1	1	1
57.6	-136.7	1620	13975	160.5	NA	12855	40	13925	50	1070	64	12004	1857	149.5	2154	3	141	BA (12.8-14.8)	EW0408-26JC	Praetorius et al., 2020	147.26		1	1	1
57.6	-136.7	1620	14267	143.625	NA	13290	35	14200	40	910	53	12326	1868	109	2154	3	141	BA (12.8-14.8)	EW0408-26JC	Praetorius et al., 2020	202.265		1	1	1
57.6	-136.7	1620	14576	139.25	NA	13195	30	14295	35	1100	46	12456	1860	61	2154	3	141	BA (12.8-14.8)	EW0408-26JC	Praetorius et al., 2020	185.535		1	1	1
57.6	-136.7	1620	14735	142.375	NA	13230	45	14360	60	1130	75	12381	1905	90.5	2154	3	141	BA (12.8-14.8)	EW0408-26JC	Praetorius et al., 2020	155.258		1	1	1
57.6	-136.7	1620	15443.5	166	NA	13840	40	14810	70	970	81	12913	1890	139.25	2154	3	141	HS1 (15-17.5)	EW0408-26JC	Praetorius et al., 2020	142.965		1	1	1
57.6	-136.7	1620	16772.5	206	NA	15165	40	16540	60	1375	72	13819	2720	160	2154	3	141	HS1 (15-17.5)	EW0408-26JC	Praetorius et al., 2020	217.877		1	1	1
57.6	-136.7	1620	11800	200	NA	10330	40	12350	40	2020	57	10119	2194	110	2154	3	142	YD (11.8-12.7)	EW0408-26TC	Praetorius et al., 2020	19.4805		1	1	1
58.8	-144.5	3680	1529	11.5	NA	1640	15	3130	60	1490	62	1626	1496	67.25	2095	3	143	HOL (<6)	EW0408-87JC	Praetorius et al., 2020	24.8972		1	1	1
58.8	-144.5	3680	8337	138.75	NA	8520	20	9710	40	1190	45	7481.8	2206	150.75	2095	3	143	EHOL (7-11)	EW0408-87JC	Praetorius et al., 2020	11.9437		1	1	1
58.8	-144.5	3680	11393	98.5	NA	10715	20	12255	35	1540	40	9968.2	2266	81.25	2095	3	143		EW0408-87JC	Praetorius et al., 2020	29.4118		1	1	1
58.8	-144.5	3680	11647	79.25	NA	NaN	NaN	12875	50	NaN	NaN	10077	2809	65.25	2095	3	143		EW0408-87JC	Praetorius et al., 2020	29.0698		1	1	1
58.8	-144.5	3680	11733	73.75	NA	10975	30	12695	35	1720	46	10093	2588	62	2095	3	143	YD (11.8-12.7)	EW0408-87JC	Praetorius et al., 2020	29.3398		1	1	1
58.8	-144.5	3680	12142	60	NA	11090	25	12970	30	1880	39	10357	2608	41.75	2095	3	143	YD (11.8-12.7)	EW0408-87JC	Praetorius et al., 2020	29.106		1	1	1
58.8	-144.5	3680	12623	75.25	NA	11695	30	13100	35	1405	46	10588	2531	105.75	2095	3	143	YD (11.8-12.7)	EW0408-87JC	Praetorius et al., 2020	30.0752		1	1	1
58.8	-144.5	3680	13288	73	NA	12460	40	13800	45	1340	60	11373	2389	91.75	2095	3	143	BA (12.8-14.8)	EW0408-87JC	Praetorius et al., 2020	30.5343		1	1	1
58.8	-144.5	3680	14205	114.5	NA	13170	40	14420	45	1250	60	12305	2124	108.25	2095	3	143	BA (12.8-14.8)	EW0408-87JC	Praetorius et al., 2020	32.7869		1	1	1
58.8	-144.5	3680	14571	140	NA	13330	45	14740	60	1410	75	12454	2307	77.5	2095	3	143	BA (12.8-14.8)	EW0408-87JC	Praetorius et al., 2020	55.4017		1	1	1
58.8	-144.5	3680	15293	140.25	NA	13830	30	15255	35	1425	46	12828	2429	110	2095	3	143	HS1 (15-17.5)	EW0408-87JC	Praetorius et al., 2020	76.2548		1	1	1
58.8	-144.5	3680	15811	109.75	NA	14290	40	15875	50	1585	64	13188	2690	99.75	2095	3	143	HS1 (15-17.5)	EW0408-87JC	Praetorius et al., 2020	122.291		1	1	1
58.8	-144.5	3680	16134	116.75	NA	14560	70	16180	60	1620	92	13395	2780	105	2095	3	143	HS1 (15-17.5)	EW0408-87JC	Praetorius et al., 2020	196.319		1	1	1
58.8	-144.5	3680	16297	130.5	NA	14840	70	16450	50	1610	86	13513	2933	108.25	2095	3	143	HS1 (15-17.5)	EW0408-87JC	Praetorius et al., 2020	432.432		1	1	1
58.8	-144.5	3680	16408	134.5	NA	14930	60	16630	80	1700	100	13607	3031	126.25	2095	3	143	HS1 (15-17.5)	EW0408-87JC	Praetorius et al., 2020	677.362		1	1	1
58.8	-144.5	3680	16969	186	NA	15060	45	17030	120	1970	128	13915	3080	186.75	2095	3	143	HS1 (15-17.5)	EW0408-87JC	Praetorius et al., 2020	476.744		1	1	1
22.9	-109.5	640	418	155	C	NaN	NaN	1795	35	NaN	NaN	299	1441	165	1283	3	144	HOL (<6)	ET97-7T	Rafter et al (2019)	8.12348	Extreme depletions	0	0	0
22.9	-109.5	640	421	155	C	NaN	NaN	2030	20	NaN	NaN	306	1678	156.5	1283	3	144	HOL (<6)	ET97-7T	Rafter et al (2019)	8.12348	Extreme depletions	0	0	0
22.9	-109.5	640	7807	134	C	NaN	NaN	8875	25	NaN	NaN	6991	1896	158.75	1283	3	144	EHOL (7-11)	ET97-7T	Rafter et al (2019)	1.9305	Extreme depletions	0	0	0
22.9	-109.5	640	7813	136	C	NaN	NaN	9735	30	NaN	NaN	6977.8	2751	161.75	1283	3	144	EHOL (7-11)	ET97-7T	Rafter et al (2019)	1.9305	Extreme depletions	0	0	0
22.9	-109.5	640	9885	167	C	NaN	NaN	12535	45	NaN	NaN	8792	3704	106.5	1283	3	144	EHOL (7-11)	ET97-7T	Rafter et al (2019)	58.8235	Extreme depletions	0	0	0
22.9	-109.5	640	9888	167	C	NaN	NaN	13165	35	NaN	NaN	8799.8	4332	102	1283	3	144	EHOL (7-11)	ET97-7T	Rafter et al (2019)	58.8235	Extreme depletions	0	0	0
22.9	-109.5	640	9922	175	C	NaN	NaN	14170	140	NaN	NaN	8882.6	5323	176.75	1283	3	144	EHOL (7-11)	ET97-7T	Rafter et al (2019)	6.35593	Extreme depletions	0	0	0
22.9	-109.5	640	9923	172	C	NaN	NaN	12180	30	NaN	NaN	8883.4	3331	101	1283	3	144	EHOL (7-11)	ET97-7T	Rafter et al (2019)	6.35593	Extreme depletions	0	0	0
22.9	-109.5	640	9926	175	C	NaN	NaN	14210	280	NaN	NaN	8885	5359	295	1283	3	144	EHOL (7-11)	ET97-7T	Rafter et al (2019)	6.35593	Extreme depletions	0	0	0
22.9	-109.5	640	10398	234	C	NaN	NaN	14950	180	NaN	NaN	9219.4	5722	263.25	1283	3	144	EHOL (7-11)	ET97-7T	Rafter et al (2019)	13.9721	Extreme depletions	0	0	0
22.9	-109.5	640	10400	232	C	NaN	NaN	14830	160	NaN	NaN	9219	5599	249.5	1283	3	144	EHOL (7-11)	ET97-7T	Rafter et al (2019)	13.9721	Extreme depletions	0	0	0
22.9	-109.5	640	10401	234	C	NaN	NaN	15020	40	NaN	NaN	9219.8	5784	130	1283	3	144	EHOL (7-11)	ET97-7T	Rafter et al (2019)	13.9721	Extreme depletions	0	0	0
22.9	-109.5	640	10902	188	C	NaN	NaN	14360	60	NaN	NaN	9629.4	4784	148.75	1283	3	144	EHOL (7-11)	ET97-7T	Rafter et al (2019)	15.186	Extreme depletions	0	0	0
22.9	-109.5	640	10902	192	C	NaN	NaN	14520	60	NaN	NaN	9629.4	4944	153.5	1283	3	144	EHOL (7-11)	ET97-7T	Rafter et al (2019)	15.186	Extreme depletions	0	0	0
22.9	-109.5	640	10906	192	C	NaN	NaN	14310	180	NaN	NaN	9630	4735	216.5	1283	3	144	EHOL (7-11)	ET97-7T	Rafter et al (2019)	15.186	Extreme depletions	0	0	0
22.9	-109.5	640	12223	253	C	NaN	NaN	15695	50	NaN	NaN	10399	5327	150	1283	3	144	YD (11.8-12.7)	ET97-7T	Rafter et al (2019)	15.3453	Extreme depletions	0	0	0
22.9	-109.5	640	12229	256	C	NaN	NaN	17090	80	NaN	NaN	10386	6719	166	1283	3	144	YD (11.8-12.7)	ET97-7T	Rafter et al (2019)	15.3453	Extreme depletions	0	0	0
22.9	-109.5	640	12236	258	C	NaN	NaN	15683	48	NaN	NaN	10371	5311	156.75	1283	3	144	YD (11.8-12.7)	ET97-7T	Rafter et al (2019)	15.3453	Extreme depletions	0	0	0
22.9	-109.5	640	13409	142	C	NaN	NaN	15595	35	NaN	NaN	11524	4055	156.25	1283	3	144	BA (12.8-14.8)	ET97-7T	Rafter et al (2019)	1.86359	Extreme depletions	0	0	0
22.9	-109.5	640	13412	144	C	NaN	NaN	16025	40	NaN	NaN	11527	4482	159	1283	3	144	BA (12.8-14.8)	ET97-7T	Rafter et al (2019)	1.86359	Extreme depletions	0	0	0
22.9	-109.5	640	16095	215	C	NaN	NaN	16980	40	NaN	NaN	13376	3603	157.25	1283	3	144	HS1 (15-17.5)	ET97-7T	Rafter et al (2019)	7.63359	Extreme depletions	0	0	0
22.9	-109.5	640	16100	212	C	NaN	NaN	16570	45	NaN	NaN	13378	3190	156.5	1283	3	144	HS1 (15-17.5)	ET97-7T	Rafter et al (2019)	7.63359	Extreme depletions	0	0	0
22.9	-109.5	640	16362	229	C	NaN	NaN	16960	40	NaN	NaN	13574	3390	156	1283	3	144	HS1 (15-17.5)	ET97-7T	Rafter et al (2019)	10	Extreme depletions	0	0	0
22.9	-109.5	640	16562	216	C	NaN	NaN	17295	45	NaN	NaN	13696	3594	145.25	1283	3	144	HS1 (15-17.5)	ET97-7T	Rafter et al (2019)	10.5263	Extreme depletions	0	0	0
22.9	-109.5	640	16657	203	C	NaN	NaN	17230	130	NaN	NaN	13766	3475	184	1283	3	144	HS1 (15-17.5)	ET97-7T	Rafter et al (2019)	10.5263	Extreme depletions	0	0	0
22.9	-109.5	640	16660.5	204	C	NaN	NaN	17620	70	NaN	NaN	13768	3860	152.25	1283	3	144	HS1 (15-17.5)	ET97-7T	Rafter et al (2019)	10.5263	Extreme depletions	0	0	0
22.9	-109.5	150	10892	193	C	15730	270	NaN	NaN	NaN	NaN	9623.6	6161	291.5	757	3	145	EHOL (7-11)	LPAZ21P	Rafter et al (2019)	6.1054	Extreme depletions	0	0	0
22.9	-109.5	150	11451	256	C	14090	60	NaN	NaN	NaN	NaN	10010	4086	186.25	757	3	145		LPAZ21P	Rafter et al (2019)	5.93835	Extreme depletions	0	0	0
22.9	-109.5	150	11574	249	C	15630	80	NaN	NaN	NaN	NaN	10025	5579	187.25	757	3	145	YD (11.8-12.7)	LPAZ21P	Rafter et al (2019)	6.04804	Extreme depletions	0	0	0
22.9	-109.5	150	11577	257	C	14950	80	NaN	NaN	NaN	NaN	10023	4897	191.75	757	3	145	YD (11.8-12.7)	LPAZ21P	Rafter et al (2019)	6.04647	Extreme depletions	0	0	0
22.9	-109.5	150	11962	298	C	15630	90	NaN	NaN	NaN	NaN	10277	5369	168	757	3	145	YD (11.8-12.7)	LPAZ21P	Rafter et al (2019)	6.10266	Extreme depletions	0	0	0
22.9	-109.5	150	12229	254	C	15280	100	NaN	NaN	NaN	NaN	10386	4909	174	757	3	145	YD (11.8-12.7)	LPAZ21P	Rafter et al (2019)	6.13296	Extreme depletions	0	0	0
22.9	-109.5	150	12723	209	C	16155	50	NaN	NaN	NaN	NaN	10709	5407	217.25	757	3	145		LPAZ21P	Rafter et al (2019)	6.13063	Extreme depletions	0	0	0
22.9	-109.5	150	12992	128	C	16660	100	NaN	NaN	NaN	NaN	11050	5597	172.5	757	3	145	BA (12.8-14.8)	LPAZ21P	Rafter et al (2019)	6.15764	Extreme depletions	0	0	0
22.9	-109.5	150	13577	166	C	17060	440	NaN	NaN	NaN	NaN	11689	5333	463.5	757	3	145	BA (12.8-14.8)	LPAZ21P	Rafter et al (2019)	6.11328	Extreme depletions	0	0	0
22.9	-109.5	150	13578	166	C	17040	100	NaN	NaN	NaN	NaN	11693	5304	195.75	757	3	145	BA (12.8-14.8)	LPAZ21P	Rafter et al (2019)	6.11283	Extreme depletions	0	0	0
22.9	-109.5	150	13694	156	C	15920	110	NaN	NaN	NaN	NaN	11836	4077	185.75	757	3	145	BA (12.8-14.8)	LPAZ21P	Rafter et al (2019)	6.2071	Extreme depletions	0	0	0
22.9	-109.5	150	13941	265	C	17600	60	NaN	NaN	NaN	NaN	12019	5547	220.5	757	3	145	BA (12.8-14.8)	LPAZ21P	Rafter et al (2019)	6.16885	Extreme depletions	0	0	0
22.9	-109.5	150	14539	253	C	17080	340	NaN	NaN	NaN	NaN	12439	4666	349.75	757	3	145	BA (12.8-14.8)	LPAZ21P	Rafter et al (2019)	6.05269	Extreme depletions	0	0	0
22.9	-109.5	150	14558	255	C	16910	340	NaN	NaN	NaN	NaN	12448	4490	349.75	757	3	145	BA (12.8-14.8)	LPAZ21P	Rafter et al (2019)	6.04479	Extreme depletions	0	0	0
22.9	-109.5	150	16356	240	C	17800	180	NaN	NaN	NaN	NaN	13568	4240	239.5	757	3	145	HS1 (15-17.5)	LPAZ21P	Rafter et al (2019)	5.56371	Extreme depletions	0	0	0
22.9	-109.5	150	16358.5	235	C	17550	120	NaN	NaN	NaN	NaN	13571	3987	196.5	757	3	145	HS1 (15-17.5)	LPAZ21P	Rafter et al (2019)	5.56286	Extreme depletions	0	0	0
22.9	-109.5	150	16746	203	C	16650	160	NaN	NaN	NaN	NaN	13810	2844	208.5	757	3	145	HS1 (15-17.5)	LPAZ21P	Rafter et al (2019)	5.55357	Extreme depletions	0	0	0
22.9	-109.5	150	18493	132	C	16560	60	NaN	NaN	NaN	NaN	15154	1373	132.5	757	3	145		LPAZ21P	Rafter et al (2019)	5.19115	Extreme depletions	0	0	0
22.9	-109.5	150	18496	134	C	17060	110	NaN	NaN	NaN	NaN	15149	1871	161.25	757	3	145		LPAZ21P	Rafter et al (2019)	5.16328	Extreme depletions	0	0	0
22.9	-109.5	150	20728	164	C	19660	70	NaN	NaN	NaN	NaN	17138	2498	174.75	757	3	145	LGM (19-21.8)	LPAZ21P	Rafter et al (2019)	4.65554	Extreme depletions	0	0	0
22.9	-109.5	150	20917	197	C	19560	560	NaN	NaN	NaN	NaN	17356	2214	576.75	757	3	145	LGM (19-21.8)	LPAZ21P	Rafter et al (2019)	4.68518	Extreme depletions	0	0	0
22.9	-109.5	150	21645	231	C	20210	80	NaN	NaN	NaN	NaN	17792	2389	170	757	3	145	LGM (19-21.8)	LPAZ21P	Rafter et al (2019)	4.6893	Extreme depletions	0	0	0
22.9	-109.5	150	22026	204	C	20970	190	NaN	NaN	NaN	NaN	18064	2890	268.25	757	3	145		LPAZ21P	Rafter et al (2019)	4.67629	Extreme depletions	0	0	0
22.9	-109.5	150	22030	204	C	20940	500	NaN	NaN	NaN	NaN	18069	2849	527	757	3	145		LPAZ21P	Rafter et al (2019)	4.67544	Extreme depletions	0	0	0
22.9	-109.5	150	23046	250	C	21810	210	NaN	NaN	NaN	NaN	19194	2661	322.75	757	3	145		LPAZ21P	Rafter et al (2019)	4.55611	Extreme depletions	0	0	0
22.9	-109.5	150	24423	219	C	22640	100	NaN	NaN	NaN	NaN	20353	2287	191	757	3	145		LPAZ21P	Rafter et al (2019)	4.56537	Extreme depletions	0	0	0
22.9	-109.5	150	26702	174	C	24910	200	NaN	NaN	NaN	NaN	22385	2504	238.75	757	3	145	preLGM (25-30)	LPAZ21P	Rafter et al (2019)	4.38169	Extreme depletions	0	0	0
22.9	-109.5	150	26706	177	C	25520	320	NaN	NaN	NaN	NaN	22383	3114	342	757	3	145	preLGM (25-30)	LPAZ21P	Rafter et al (2019)	4.38104	Extreme depletions	0	0	0
22.9	-109.5	150	27725	130	C	27090	300	NaN	NaN	NaN	NaN	23502	3544	374.5	757	3	145	preLGM (25-30)	LPAZ21P	Rafter et al (2019)	4.31019	Extreme depletions	0	0	0
22.9	-109.5	150	29461	176	C	26560	550	NaN	NaN	NaN	NaN	25252	1319	554	757	3	145	preLGM (25-30)	LPAZ21P	Rafter et al (2019)	4.17501	Extreme depletions	0	0	0
22.9	-109.5	150	31069	72	C	29970	630	NaN	NaN	NaN	NaN	26823	3110	654	757	3	145		LPAZ21P	Rafter et al (2019)	4.08768	Extreme depletions	0	0	0
22.9	-109.5	624	4313	218	C	NaN	NaN	5670	60	NaN	NaN	3900	1785	161.25	1283	3	145	HOL (<6)	LPAZ21P	Rafter et al (2019)	5.36242	Extreme depletions	0	0	0
22.9	-109.5	624	4313	218	C	NaN	NaN	5832	58	NaN	NaN	3900	1947	160.5	1283	3	145	HOL (<6)	LPAZ21P	Rafter et al (2019)	5.36242	Extreme depletions	0	0	0
22.9	-109.5	624	4313	220	C	NaN	NaN	5955	40	NaN	NaN	3900	2072	154	1283	3	145	HOL (<6)	LPAZ21P	Rafter et al (2019)	5.36242	Extreme depletions	0	0	0
22.9	-109.5	624	6076	161	C	NaN	NaN	8470	70	NaN	NaN	5311.8	3167	167.75	1283	3	145	HOL (<6)	LPAZ21P	Rafter et al (2019)	5.36242	Extreme depletions	0	0	0
22.9	-109.5	624	6309	165	C	NaN	NaN	7215	20	NaN	NaN	5552.6	1673	145.5	1283	3	145		LPAZ21P	Rafter et al (2019)	5.36242	Extreme depletions	0	0	0
22.9	-109.5	624	6310	168	C	NaN	NaN	7215	20	NaN	NaN	5556	1671	148	1283	3	145		LPAZ21P	Rafter et al (2019)	5.36242	Extreme depletions	0	0	0
22.9	-109.5	624	7748.5	127	C	NaN	NaN	8360	140	NaN	NaN	6935.2	1437	199	1283	3	145	EHOL (7-11)	LPAZ21P	Rafter et al (2019)	5.36242	Extreme depletions	0	0	0
22.9	-109.5	624	7750	126	C	NaN	NaN	8425	23	NaN	NaN	6937	1490	148.25	1283	3	145	EHOL (7-11)	LPAZ21P	Rafter et al (2019)	5.36242	Extreme depletions	0	0	0
22.9	-109.5	624	8006	150	C	NaN	NaN	9320	120	NaN	NaN	7183.2	2118	195	1283	3	145	EHOL (7-11)	LPAZ21P	Rafter et al (2019)	5.36242	Extreme depletions	0	0	0
22.9	-109.5	624	8008	151	C	NaN	NaN	9185	25	NaN	NaN	7187.6	1970	147.25	1283	3	145	EHOL (7-11)	LPAZ21P	Rafter et al (2019)	5.36242	Extreme depletions	0	0	0
22.9	-109.5	624	8107	141	C	NaN	NaN	8865	35	NaN	NaN	7293	1556	147.25	1283	3	145	EHOL (7-11)	LPAZ21P	Rafter et al (2019)	5.36242	Extreme depletions	0	0	0
22.9	-109.5	624	8395	182	C	NaN	NaN	9075	35	NaN	NaN	7602	1465	179.5	1283	3	145	EHOL (7-11)	LPAZ21P	Rafter et al (2019)	5.36242	Extreme depletions	0	0	0
22.9	-109.5	624	8773	193	C	NaN	NaN	9078	30	NaN	NaN	7949.8	1132	149.25	1283	3	145	EHOL (7-11)	LPAZ21P	Rafter et al (2019)	5.36242	Extreme depletions	0	0	0
22.9	-109.5	624	8931	205	C	NaN	NaN	9265	30	NaN	NaN	7961	1265	136.5	1283	3	145	EHOL (7-11)	LPAZ21P	Rafter et al (2019)	5.36242	Extreme depletions	0	0	0
22.9	-109.5	624	8936	206	C	NaN	NaN	9370	25	NaN	NaN	7965.8	1370	133.5	1283	3	145	EHOL (7-11)	LPAZ21P	Rafter et al (2019)	5.36242	Extreme depletions	0	0	0
22.9	-109.5	624	9923	175	C	NaN	NaN	14105	48	NaN	NaN	8883.4	5257	112.5	1283	3	145	EHOL (7-11)	LPAZ21P	Rafter et al (2019)	5.36242	Extreme depletions	0	0	0
22.9	-109.5	624	9924	174	C	NaN	NaN	12205	30	NaN	NaN	8884.2	3356	101.25	1283	3	145	EHOL (7-11)	LPAZ21P	Rafter et al (2019)	5.36242	Extreme depletions	0	0	0
22.9	-109.5	624	10885	194	C	NaN	NaN	15210	45	NaN	NaN	9619	5638	147	1283	3	145	EHOL (7-11)	LPAZ21P	Rafter et al (2019)	5.36242	Extreme depletions	0	0	0
22.9	-109.5	624	10886	196	C	NaN	NaN	16880	650	NaN	NaN	9619.6	7313	648.5	1283	3	145	EHOL (7-11)	LPAZ21P	Rafter et al (2019)	5.36242	Extreme depletions	0	0	0
22.9	-109.5	624	10889.5	191	C	NaN	NaN	15150	280	NaN	NaN	9621.7	5582	299.5	1283	3	145	EHOL (7-11)	LPAZ21P	Rafter et al (2019)	5.36242	Extreme depletions	0	0	0
22.9	-109.5	624	11452	253	C	NaN	NaN	13600	50	NaN	NaN	10009	3594	182	1283	3	145		LPAZ21P	Rafter et al (2019)	5.36242	Extreme depletions	0	0	0
22.9	-109.5	624	11455	257	C	NaN	NaN	14360	150	NaN	NaN	10007	4370	230.5	1283	3	145		LPAZ21P	Rafter et al (2019)	5.36242	Extreme depletions	0	0	0
22.9	-109.5	624	11572	256	C	NaN	NaN	14030	110	NaN	NaN	10026	3979	202	1283	3	145	YD (11.8-12.7)	LPAZ21P	Rafter et al (2019)	5.36242	Extreme depletions	0	0	0
22.9	-109.5	624	11574	252	C	NaN	NaN	14870	170	NaN	NaN	10025	4819	231	1283	3	145	YD (11.8-12.7)	LPAZ21P	Rafter et al (2019)	5.36242	Extreme depletions	0	0	0
22.9	-109.5	624	11574	257	C	NaN	NaN	15120	90	NaN	NaN	10025	5068	195.25	1283	3	145	YD (11.8-12.7)	LPAZ21P	Rafter et al (2019)	5.36242	Extreme depletions	0	0	0
22.9	-109.5	624	11579	259	C	NaN	NaN	14610	180	NaN	NaN	10020	4557	240.5	1283	3	145	YD (11.8-12.7)	LPAZ21P	Rafter et al (2019)	5.36242	Extreme depletions	0	0	0
22.9	-109.5	624	11973	296	C	NaN	NaN	15600	60	NaN	NaN	10290	5325	150.25	1283	3	145	YD (11.8-12.7)	LPAZ21P	Rafter et al (2019)	5.36242	Extreme depletions	0	0	0
22.9	-109.5	624	12219	251	C	NaN	NaN	15340	70	NaN	NaN	10408	4973	155	1283	3	145	YD (11.8-12.7)	LPAZ21P	Rafter et al (2019)	5.36242	Extreme depletions	0	0	0
22.9	-109.5	624	12227	252	C	NaN	NaN	17740	60	NaN	NaN	10391	7370	153.5	1283	3	145	YD (11.8-12.7)	LPAZ21P	Rafter et al (2019)	5.36242	Extreme depletions	0	0	0
22.9	-109.5	624	12227.5	260	C	NaN	NaN	17200	70	NaN	NaN	10390	6830	165	1283	3	145	YD (11.8-12.7)	LPAZ21P	Rafter et al (2019)	5.36242	Extreme depletions	0	0	0
22.9	-109.5	624	12229	249	C	NaN	NaN	15965	45	NaN	NaN	10386	5595	146.25	1283	3	145	YD (11.8-12.7)	LPAZ21P	Rafter et al (2019)	5.36242	Extreme depletions	0	0	0
22.9	-109.5	624	12718	210	C	NaN	NaN	17640	60	NaN	NaN	10691	6905	221.5	1283	3	145		LPAZ21P	Rafter et al (2019)	5.36242	Extreme depletions	0	0	0
22.9	-109.5	624	12720	207	C	NaN	NaN	16760	70	NaN	NaN	10696	6016	225.25	1283	3	145		LPAZ21P	Rafter et al (2019)	5.36242	Extreme depletions	0	0	0
22.9	-109.5	624	12720	211	C	NaN	NaN	18400	90	NaN	NaN	10696	7652	238.5	1283	3	145		LPAZ21P	Rafter et al (2019)	5.36242	Extreme depletions	0	0	0
22.9	-109.5	624	12722	207	C	NaN	NaN	15800	45	NaN	NaN	10704	5057	212.5	1283	3	145		LPAZ21P	Rafter et al (2019)	5.36242	Extreme depletions	0	0	0
22.9	-109.5	624	12991	127	C	NaN	NaN	15720	150	NaN	NaN	11049	4653	202.75	1283	3	145	BA (12.8-14.8)	LPAZ21P	Rafter et al (2019)	5.36242	Extreme depletions	0	0	0
22.9	-109.5	624	12994	128	C	NaN	NaN	14540	70	NaN	NaN	11051	3480	156.25	1283	3	145	BA (12.8-14.8)	LPAZ21P	Rafter et al (2019)	5.36242	Extreme depletions	0	0	0
22.9	-109.5	624	12994	126	C	NaN	NaN	16970	70	NaN	NaN	11051	5911	153.75	1283	3	145	BA (12.8-14.8)	LPAZ21P	Rafter et al (2019)	5.36242	Extreme depletions	0	0	0
22.9	-109.5	624	12998	127	C	NaN	NaN	16550	45	NaN	NaN	11055	5492	142.5	1283	3	145	BA (12.8-14.8)	LPAZ21P	Rafter et al (2019)	5.36242	Extreme depletions	0	0	0
22.9	-109.5	624	13578	168	C	NaN	NaN	17520	80	NaN	NaN	11693	5781	188.25	1283	3	145	BA (12.8-14.8)	LPAZ21P	Rafter et al (2019)	5.36242	Extreme depletions	0	0	0
22.9	-109.5	624	13578	167	C	NaN	NaN	17620	70	NaN	NaN	11693	5879	183.5	1283	3	145	BA (12.8-14.8)	LPAZ21P	Rafter et al (2019)	5.36242	Extreme depletions	0	0	0
22.9	-109.5	624	13692	159	C	NaN	NaN	17880	150	NaN	NaN	11836	6039	213	1283	3	145	BA (12.8-14.8)	LPAZ21P	Rafter et al (2019)	5.36242	Extreme depletions	0	0	0
22.9	-109.5	624	13695	158	C	NaN	NaN	16935	45	NaN	NaN	11836	5097	155.75	1283	3	145	BA (12.8-14.8)	LPAZ21P	Rafter et al (2019)	5.36242	Extreme depletions	0	0	0
22.9	-109.5	624	13697	158	C	NaN	NaN	14600	60	NaN	NaN	11835	2758	161.75	1283	3	145	BA (12.8-14.8)	LPAZ21P	Rafter et al (2019)	5.36242	Extreme depletions	0	0	0
22.9	-109.5	624	13697	159	C	NaN	NaN	16640	140	NaN	NaN	11835	4794	206	1283	3	145	BA (12.8-14.8)	LPAZ21P	Rafter et al (2019)	5.36242	Extreme depletions	0	0	0
22.9	-109.5	624	13938	255	C	NaN	NaN	17760	60	NaN	NaN	12023	5709	214.5	1283	3	145	BA (12.8-14.8)	LPAZ21P	Rafter et al (2019)	5.36242	Extreme depletions	0	0	0
22.9	-109.5	624	13941	282	C	NaN	NaN	18300	50	NaN	NaN	12019	6248	228	1283	3	145	BA (12.8-14.8)	LPAZ21P	Rafter et al (2019)	5.36242	Extreme depletions	0	0	0
22.9	-109.5	624	14548	251	C	NaN	NaN	17495	50	NaN	NaN	12444	5074	121.5	1283	3	145	BA (12.8-14.8)	LPAZ21P	Rafter et al (2019)	5.36242	Extreme depletions	0	0	0
22.9	-109.5	624	14551.5	254	C	NaN	NaN	17615	50	NaN	NaN	12446	5193	124	1283	3	145	BA (12.8-14.8)	LPAZ21P	Rafter et al (2019)	5.36242	Extreme depletions	0	0	0
22.9	-109.5	624	14554	255	C	NaN	NaN	15720	90	NaN	NaN	12447	3299	142.25	1283	3	145	BA (12.8-14.8)	LPAZ21P	Rafter et al (2019)	5.36242	Extreme depletions	0	0	0
22.9	-109.5	624	15466	207	C	NaN	NaN	15895	40	NaN	NaN	12921	2963	157.25	1283	3	145	HS1 (15-17.5)	LPAZ21P	Rafter et al (2019)	5.36242	Extreme depletions	0	0	0
22.9	-109.5	624	16359	232	C	NaN	NaN	18130	80	NaN	NaN	13571	4565	173.25	1283	3	145	HS1 (15-17.5)	LPAZ21P	Rafter et al (2019)	5.36242	Extreme depletions	0	0	0
22.9	-109.5	624	16361	238	C	NaN	NaN	18260	310	NaN	NaN	13573	4697	344	1283	3	145	HS1 (15-17.5)	LPAZ21P	Rafter et al (2019)	5.36242	Extreme depletions	0	0	0
[truncated: 1,253 more rows]

## Sheet: Data headings
Latitude (degrees north)
Longitude (degrees east)
Water depth (m)
Calendar age (years BP)
Calendar age uncertainty (1 sigma)
Age model class (TS = Bchron age model using Marine20, S = 'spot' calibrated age using Marine 20, C = corrected to Intcal20 by using the published cal age and the Intcal20-13 offset, NA = no age update applied)
Planktonic 14C age (years)
Planktonic 14C age uncertainty (1 sigma)
Benthic 14C age (years)
Benthic 14C age uncertainty (1 sigma)
Benthic-Planktonic 14C age offset (years)
Benthic-Planktonic 14C age offset uncertainty (1 sigma)
Coeval atmospheric 14C age, Intcal20 (years)
R-age or B-Atm, Benthic-atmosphere 14C age offset (years)
R-age or B-Atm, Benthic-atmosphere 14C age offset uncertainty (1 sigma)
Modern seawater-atmosphere 14C age offset, GLODAP (years)
Ocean basin (1= North Atlantic, 2=South Atlantic, 3=North Pacific, 4=South Pacific, 5=Indian, 6 = Arctic, 7 = Mediterranean, 8=Southern Ocean)
Record number
Time slice allocation
Site name
Reference
Estimated sedimentation rate (cm/kyr)
Flag comments
INCLUDE BASELINE FLAGS (y=1/n=0)
INCLUDE LOW SEDIMENTATION FLAGS (y=1/n=0)
INCLUDE HIGH SED RATE FLAGS ONLY (y=1/n=0)

## Sheet: Regional splines
N.Atlantic deep (>0oN, >2500m)					N.Atlantic shallow (>0oN, <2000m)					N.Pacific deep (>0oN, >2000m)					N.Pacific intermediate (>0oN, 900-2000m)					S.Ocean deep (>30oS, >2000m)					S.Ocean shallow (>30oS, <2000m)					N.Atlantic Surface (>40oN, <200m)					S.Ocean Surface (>30oS, <200m)
Spline_b_NATL_0oN_deep_2500					Spline_b_NATL_0oN_sub2k					Spline_b_NPAC_0oN_deep					Spline_b_NPAC_0oN_int					Spline_b_SOdeep					Spline_b_SOsub2k					Spline_b_NATL_40oNsurf					Spline_b_SO_surf
Age	0.5	LCI (1 sigma)	UCI (1 sigma)		Age	0.5	LCI (1 sigma)	UCI (1 sigma)		Age	0.5	LCI (1 sigma)	UCI (1 sigma)		Age	0.5	LCI (1 sigma)	UCI (1 sigma)		Age	0.5	LCI (1 sigma)	UCI (1 sigma)		Age	0.5	LCI (1 sigma)	UCI (1 sigma)		Age	0.5	LCI (1 sigma)	UCI (1 sigma)		Age	0.5	LCI (1 sigma)	UCI (1 sigma)
212.12	1148.2	907.53	1388.9		267	763.44	712.74	814.13		76.253	2282.5	2188.9	2376		1293	2315.4	1565.2	3065.5		947	1387.9	1207.9	1567.9		9	780.6	702.74	858.45		1300	362.93	41.221	684.63		1718	504.92	416.25	593.59
246.19	1144.6	904.07	1385.1		297.61	761.28	711.05	811.51		105.84	2277.6	2185.1	2370.1		1325.9	2319.2	1586	3052.4		986.75	1378.3	1203	1553.7		48.283	791.5	715.56	867.43		1328.6	363.05	44.413	681.69		1750.4	508.54	419.88	597.19
280.26	1141	900.4	1381.6		328.22	759.13	709.24	809.02		135.43	2272.8	2181.3	2364.3		1358.8	2323	1606.8	3039.3		1026.5	1368.8	1197.7	1539.9		87.567	802.39	728.33	876.45		1357.2	363.17	47.55	678.79		1782.8	512.15	423.44	600.87
314.33	1137.4	896.53	1378.2		358.83	756.99	707.32	806.66		165.01	2268	2177.4	2358.5		1391.7	2326.9	1627.5	3026.3		1066.2	1359.3	1192.1	1526.4		126.85	813.26	741.02	885.5		1385.8	363.29	50.63	675.96		1815.2	515.77	426.92	604.61
348.4	1133.7	892.46	1375		389.45	754.88	705.3	804.45		194.6	2263.1	2173.5	2352.7		1424.6	2330.7	1648.2	3013.2		1106	1349.8	1186.1	1513.5		166.13	824.1	753.62	894.58		1414.5	363.42	53.653	673.19		1847.6	519.38	430.34	608.42
382.47	1130.1	888.2	1372		420.06	752.79	703.18	802.4		224.18	2258.2	2169.6	2346.9		1457.5	2334.5	1668.8	3000.2		1145.7	1340.5	1179.8	1501.1		205.42	834.89	766.11	903.67		1443.1	363.55	56.616	670.48		1880	522.99	433.68	612.31
416.54	1126.4	883.77	1369.1		450.67	750.74	700.98	800.5		253.77	2253.4	2165.5	2341.2		1490.4	2338.3	1689.4	2987.2		1185.5	1331.2	1173.1	1489.3		244.7	845.62	778.48	912.77		1471.7	363.68	59.519	667.83		1912.4	526.61	436.96	616.26
450.61	1122.8	879.18	1366.4		481.28	748.74	698.71	798.76		283.36	2248.5	2161.4	2335.5		1523.3	2342	1709.9	2974.2		1225.2	1322	1166.1	1478		283.98	856.29	790.71	921.87		1500.3	363.81	62.361	665.25		1944.9	530.22	440.17	620.28
484.68	1119.2	874.45	1363.9		511.89	746.78	696.37	797.19		312.94	2243.5	2157.3	2329.8		1556.2	2345.8	1730.3	2961.2		1265	1313	1158.7	1467.3		323.27	866.87	802.78	930.95		1528.9	363.94	65.14	662.74		1977.3	533.84	443.31	624.36
518.75	1115.5	869.6	1361.5		542.5	744.89	693.98	795.79		342.53	2238.6	2153.1	2324.1		1589.1	2349.5	1750.6	2948.3		1304.7	1304.2	1151.1	1457.2		362.55	877.35	814.69	940.02		1557.5	364.08	67.857	660.3		2009.7	537.45	446.39	628.51
552.82	1111.9	864.64	1359.2		573.12	743.06	691.55	794.56		372.12	2233.6	2148.8	2318.4		1622	2353.1	1770.8	2935.5		1344.5	1295.5	1143.2	1447.8		401.83	887.73	826.4	949.05		1586.2	364.22	70.508	657.94		2042.1	541.07	449.41	632.73
586.89	1108.3	859.6	1357		603.73	741.3	689.1	793.5		401.7	2228.6	2144.5	2312.7		1655	2356.7	1790.8	2922.7		1384.2	1287	1135.1	1439		441.12	897.98	837.91	958.04		1614.8	364.37	73.095	655.65		2074.5	544.68	452.37	637
620.96	1104.7	854.49	1354.8		634.34	739.61	686.63	792.6		431.29	2223.5	2140.1	2307		1687.9	2360.3	1810.7	2910		1424	1278.7	1126.7	1430.8		480.4	908.1	849.21	966.98		1643.4	364.52	75.615	653.43		2106.9	548.3	455.26	641.34
655.03	1101	849.33	1352.8		664.95	737.99	684.13	791.85		460.88	2218.4	2135.6	2301.3		1720.8	2363.8	1830.4	2897.3		1463.7	1270.7	1118.3	1423.2		519.68	918.07	860.27	975.87		1672	364.68	78.069	651.29		2139.3	551.92	458.1	645.74
689.11	1097.4	844.15	1350.7		695.56	736.42	681.6	791.23		490.46	2213.3	2131	2295.6		1753.7	2367.3	1849.9	2884.7		1503.5	1263	1109.7	1416.2		558.97	927.89	871.1	984.68		1700.6	364.85	80.455	649.24		2171.7	555.54	460.89	650.19
723.18	1093.9	838.95	1348.8		726.17	734.9	679.05	790.74		520.05	2208.1	2126.4	2289.9		1786.6	2370.7	1869.3	2872.1		1543.2	1255.5	1101.2	1409.8		598.25	937.55	881.68	993.43		1729.2	365.02	82.774	647.26		2204.1	559.15	463.62	654.69
757.25	1090.3	833.78	1346.8		756.79	733.42	676.48	790.36		549.63	2202.9	2121.7	2284.1		1819.5	2374	1888.4	2859.6		1582.9	1248.3	1092.6	1403.9		637.53	947.05	892	1002.1		1757.9	365.19	85.025	645.36		2236.5	562.77	466.3	659.25
791.32	1086.7	828.64	1344.8		787.4	731.98	673.89	790.08		579.22	2197.7	2116.9	2278.4		1852.4	2377.3	1907.4	2847.2		1622.7	1241.4	1084.2	1398.6		676.82	956.38	902.06	1010.7		1786.5	365.38	87.207	643.55		2268.9	566.39	468.93	663.86
825.39	1083.2	823.56	1342.8		818.01	730.58	671.28	789.87		608.81	2192.4	2112.1	2272.7		1885.3	2380.5	1926.1	2834.9		1662.4	1234.8	1075.9	1393.8		716.1	965.53	911.86	1019.2		1815.1	365.57	89.32	641.82		2301.3	570.01	471.51	668.52
859.46	1079.6	818.55	1340.7		848.62	729.2	668.66	789.74		638.39	2187.1	2107.2	2267		1918.2	2383.6	1944.6	2822.7		1702.2	1228.6	1067.7	1389.4		755.38	974.5	921.38	1027.6		1843.7	365.77	91.365	640.18		2333.7	573.64	474.05	673.22
893.53	1076.1	813.65	1338.6		879.23	727.84	666.03	789.66		667.98	2181.8	2102.3	2261.3		1951.1	2386.7	1962.8	2810.6		1741.9	1222.6	1059.8	1385.4		794.67	983.28	930.63	1035.9		1872.3	365.98	93.341	638.62		2366.1	577.26	476.55	677.97
927.6	1072.6	808.86	1336.3		909.84	726.5	663.39	789.62		697.57	2176.5	2097.3	2255.6		1984	2389.6	1980.7	2798.6		1781.7	1217	1052.2	1381.9		833.95	991.86	939.59	1044.1		1900.9	366.2	95.249	637.15		2398.6	580.88	479.01	682.75
961.67	1069.1	804.2	1334		940.46	725.17	660.74	789.6		727.15	2171.2	2092.4	2250		2016.9	2392.5	1998.4	2786.6		1821.4	1211.7	1044.8	1378.6		873.23	1000.2	948.26	1052.2		1929.6	366.43	97.088	635.77		2431	584.5	481.43	687.58
995.74	1065.7	799.71	1331.6		971.07	723.85	658.1	789.6		756.74	2165.9	2087.4	2244.4		2049.8	2395.3	2015.8	2774.8		1861.2	1206.7	1037.7	1375.6		912.52	1008.4	956.65	1060.2		1958.2	366.67	98.86	634.48		2463.4	588.13	483.81	692.45
1029.8	1062.2	795.38	1329.1		1001.7	722.52	655.44	789.6		786.33	2160.6	2082.4	2238.9		2082.7	2398	2032.8	2763.1		1900.9	1201.9	1030.9	1372.9		951.8	1016.4	964.74	1068		1986.8	366.92	100.56	633.27		2495.8	591.76	486.17	697.35
1063.9	1058.8	791.25	1326.4		1032.3	721.19	652.79	789.59		815.91	2155.4	2077.4	2233.4		2115.6	2400.6	2049.5	2751.6		1940.7	1197.4	1024.5	1370.3		991.08	1024.1	972.55	1075.7		2015.4	367.18	102.2	632.16		2528.2	595.38	488.49	702.28
1097.9	1055.4	787.29	1323.6		1062.9	719.84	650.14	789.55		845.5	2150.2	2072.5	2227.9		2148.5	2403	2065.9	2740.2		1980.4	1193.1	1018.4	1367.9		1030.4	1031.6	980.05	1083.2		2044	367.45	103.78	631.13		2560.6	599.01	490.78	707.24
1132	1052.1	783.53	1320.7		1093.5	718.48	647.49	789.47		875.08	2145	2067.5	2222.6		2181.4	2405.4	2081.9	2728.9		2020.2	1189.1	1012.5	1365.7		1069.6	1038.9	987.27	1090.5		2072.6	367.74	105.29	630.19		2593	602.64	493.04	712.24
1166.1	1048.9	779.96	1317.8		1124.1	717.1	644.85	789.35		904.67	2139.9	2062.5	2217.2		2214.3	2407.7	2097.6	2717.7		2059.9	1185.3	1007	1363.6		1108.9	1045.9	994.18	1097.6		2101.3	368.03	106.73	629.34		2625.4	606.27	495.29	717.26
1200.2	1045.7	776.59	1314.8		1154.7	715.71	642.23	789.19		934.26	2134.8	2057.6	2212		2247.2	2409.8	2112.8	2706.8		2099.7	1181.7	1001.7	1361.8		1148.2	1052.7	1000.8	1104.6		2129.9	368.34	108.11	628.57		2657.8	609.9	497.5	722.3
1234.2	1042.6	773.4	1311.8		1185.3	714.31	639.63	788.99		963.84	2129.7	2052.6	2206.8		2280.1	2411.8	2127.7	2695.9		2139.4	1178.4	996.66	1360.1		1187.5	1059.2	1007.1	1111.3		2158.5	368.67	109.44	627.9		2690.2	613.54	499.7	727.37
1268.3	1039.6	770.41	1308.8		1216	712.9	637.05	788.74		993.43	2124.6	2047.7	2201.6		2313.1	2413.7	2142.1	2685.3		2179.1	1175.3	991.87	1358.8		1226.8	1065.5	1013.1	1117.8		2187.1	369	110.7	627.31		2722.6	617.17	501.88	732.46
1302.4	1036.7	767.6	1305.8		1246.6	711.49	634.52	788.45		1023	2119.6	2042.8	2196.5		2346	2415.5	2156.1	2674.8		2218.9	1172.5	987.32	1357.7		1266.1	1071.5	1018.8	1124.1		2215.7	369.36	111.91	626.8		2755	620.81	504.04	737.57
1336.4	1033.9	764.99	1302.9		1277.2	710.07	632.03	788.11		1052.6	2114.6	2037.9	2191.4		2378.9	2417.1	2169.6	2664.5		2258.6	1169.9	982.97	1356.9		1305.3	1077.1	1024.2	1130.1		2244.3	369.72	113.06	626.39		2787.4	624.44	506.18	742.7
1370.5	1031.3	762.57	1300		1307.8	708.66	629.6	787.73		1082.2	2109.7	2033	2186.3		2411.8	2418.6	2182.7	2654.5		2298.4	1167.6	978.82	1356.4		1344.6	1082.5	1029.2	1135.8		2273	370.1	114.16	626.05		2819.9	628.08	508.32	747.85
1404.6	1028.8	760.33	1297.2		1338.4	707.26	627.22	787.3		1111.8	2104.7	2028.2	2181.3		2444.7	2419.9	2195.2	2644.6		2338.1	1165.6	974.86	1356.3		1383.9	1087.5	1033.8	1141.2		2301.6	370.5	115.2	625.8		2852.3	631.72	510.44	753.01
1438.7	1026.4	758.26	1294.5		1369	705.87	624.92	786.82		1141.4	2099.8	2023.3	2176.3		2477.6	2421.1	2207.2	2635		2377.9	1163.8	971.06	1356.5		1423.2	1092.2	1038.1	1146.3		2330.2	370.91	116.2	625.63		2884.7	635.36	512.54	758.18
1472.7	1024.1	756.37	1291.9		1399.6	704.49	622.69	786.29		1170.9	2094.9	2018.5	2171.3		2510.5	2422.1	2218.7	2625.6		2417.6	1162.3	967.41	1357.2		1462.5	1096.5	1042	1151.1		2358.8	371.35	117.15	625.54		2917.1	639.01	514.64	763.37
1506.8	1022	754.64	1289.4		1430.2	703.13	620.54	785.72		1200.5	2090.1	2013.7	2166.4		2543.4	2423	2229.6	2616.4		2457.4	1161.1	963.91	1358.2		1501.8	1100.5	1045.5	1155.5		2387.4	371.79	118.06	625.53		2949.5	642.65	516.74	768.57
1540.9	1020	753.06	1286.9		1460.9	701.79	618.48	785.09		1230.1	2085.2	2009	2161.5		2576.3	2423.7	2239.9	2607.6		2497.1	1160.1	960.53	1359.7		1541	1104.1	1048.6	1159.5		2416	372.26	118.92	625.6		2981.9	646.3	518.82	773.77
1574.9	1018.1	751.62	1284.6		1491.5	700.47	616.52	784.42		1259.7	2080.4	2004.2	2156.5		2609.2	2424.3	2249.6	2599		2536.9	1159.4	957.25	1361.6		1580.3	1107.2	1051.3	1163.2		2444.7	372.74	119.74	625.74		3014.3	649.95	520.91	778.99
1609	1016.3	750.32	1282.3		1522.1	699.18	614.66	783.7		1289.3	2075.6	1999.5	2151.7		2642.1	2424.7	2258.7	2590.7		2576.6	1158.9	954.08	1363.8		1619.6	1110.1	1053.6	1166.5		2473.3	373.24	120.53	625.95		3046.7	653.6	522.99	784.21
1643.1	1014.6	749.15	1280.1		1552.7	697.92	612.91	782.94		1318.9	2070.9	1994.9	2146.8		2675	2424.8	2267.1	2582.6		2616.4	1158.7	950.99	1366.5		1658.9	1112.6	1055.6	1169.5		2501.9	373.76	121.29	626.24		3079.1	657.25	525.06	789.44
1677.1	1013	748.09	1278		1583.3	696.7	611.28	782.12		1348.5	2066.2	1990.4	2142		2707.9	2424.8	2274.7	2574.9		2656.1	1158.7	947.99	1369.5		1698.2	1114.8	1057.3	1172.2		2530.5	374.3	122.01	626.59		3111.5	660.9	527.14	794.67
1711.2	1011.5	747.13	1275.9		1613.9	695.51	609.78	781.25		1378.1	2061.6	1985.9	2137.3		2740.8	2424.5	2281.6	2567.3		2695.9	1159	945.06	1372.9		1737.5	1116.7	1058.8	1174.6		2559.1	374.86	122.71	627.02		3143.9	664.56	529.22	799.9
1745.3	1010.1	746.28	1273.9		1644.5	694.37	608.4	780.34		1407.6	2057.1	1981.5	2132.7		2773.7	2423.9	2287.6	2560.1		2735.6	1159.4	942.21	1376.6		1776.7	1118.4	1060	1176.8		2587.7	375.44	123.38	627.51		3176.3	668.22	531.3	805.14
1779.4	1008.8	745.51	1272		1675.1	693.27	607.17	779.37		1437.2	2052.7	1977.2	2128.2		2806.6	2423	2293	2553.1		2775.4	1160.1	939.43	1380.7		1816	1119.9	1061	1178.8		2616.4	376.04	124.03	628.06		3208.7	671.88	533.38	810.38
1813.4	1007.5	744.83	1270.2		1705.7	692.22	606.08	778.36		1466.8	2048.4	1973.1	2123.8		2839.5	2422	2297.5	2546.5		2815.1	1160.9	936.73	1385.1		1855.3	1121.1	1061.7	1180.5		2645	376.67	124.66	628.67		3241.1	675.54	535.47	815.61
1847.5	1006.3	744.21	1268.4		1736.4	691.21	605.13	777.3		1496.4	2044.3	1969	2119.5		2872.4	2420.7	2301.3	2540.2		2854.8	1161.9	934.11	1389.8		1894.6	1122.2	1062.3	1182		2673.6	377.31	125.27	629.35		3273.6	679.2	537.56	820.85
1881.6	1005.2	743.66	1266.7		1767	690.26	604.32	776.2		1526	2040.3	1965.2	2115.4		2905.3	2419.3	2304.3	2534.3		2894.6	1163.2	931.56	1394.7		1933.9	1123	1062.6	1183.3		2702.2	377.98	125.88	630.08		3306	682.87	539.66	826.08
1915.6	1004.1	743.16	1265.1		1797.6	689.35	603.64	775.06		1555.6	2036.4	1961.4	2111.4		2938.2	2417.7	2306.6	2528.7		2934.3	1164.5	929.1	1400		1973.2	1123.6	1062.8	1184.4		2730.8	378.67	126.47	630.86		3338.4	686.54	541.76	831.31
1949.7	1003.1	742.71	1263.5		1828.2	688.48	603.09	773.88		1585.2	2032.7	1957.9	2107.6		2971.2	2415.9	2308.2	2523.6		2974.1	1166.1	926.72	1405.5		2012.4	1124	1062.7	1185.3		2759.4	379.38	127.06	631.7		3370.8	690.21	543.88	836.54
1983.8	1002.2	742.29	1262		1858.8	687.66	602.64	772.67		1614.7	2029.2	1954.5	2103.9		3004.1	2413.9	2309	2518.8		3013.8	1167.8	924.45	1411.2		2051.7	1124.2	1062.5	1186		2788.1	380.11	127.64	632.59		3403.2	693.88	546	841.76
2017.8	1001.2	741.9	1260.6		1889.4	686.87	602.3	771.44		1644.3	2025.8	1951.2	2100.5		3037	2411.8	2309.2	2514.5		3053.6	1169.7	922.28	1417		2091	1124.2	1062	1186.5		2816.7	380.87	128.23	633.52		3435.6	697.56	548.14	846.98
2051.9	1000.4	741.52	1259.2		1920	686.12	602.06	770.18		1673.9	2022.6	1948.1	2097.2		3069.9	2409.6	2308.8	2510.5		3093.3	1171.7	920.23	1423.1		2130.3	1124.1	1061.4	1186.8		2845.3	381.66	128.81	634.5		3468	701.24	550.28	852.19
2086	999.53	741.16	1257.9		1950.6	685.41	601.9	768.91		1703.5	2019.6	1945.1	2094		3102.8	2407.3	2307.7	2506.9		3133.1	1173.8	918.31	1429.2		2169.6	1123.7	1060.6	1186.9		2873.9	382.47	129.41	635.53		3500.4	704.92	552.44	857.39
2120.1	998.72	740.79	1256.6		1981.3	684.73	601.82	767.63		1733.1	2016.7	1942.3	2091		3135.7	2404.9	2306.1	2503.7		3172.8	1176	916.54	1435.5		2208.9	1123.2	1059.6	1186.8		2902.5	383.3	130.01	636.59		3532.8	708.6	554.61	862.58
2154.1	997.94	740.42	1255.4		2011.9	684.07	601.81	766.34		1762.7	2013.9	1939.7	2088.2		3168.6	2402.4	2304	2500.8		3212.6	1178.4	914.91	1441.8		2248.1	1122.5	1058.5	1186.6		2931.1	384.16	130.63	637.7		3565.2	712.28	556.8	867.77
2188.2	997.17	740.04	1254.3		2042.5	683.45	601.86	765.04		1792.3	2011.4	1937.2	2085.6		3201.5	2399.9	2301.5	2498.3		3252.3	1180.8	913.46	1448.2		2287.4	1121.6	1057.1	1186.2		2959.8	385.05	131.26	638.84		3597.6	715.97	559	872.94
2222.3	996.42	739.64	1253.2		2073.1	682.86	601.97	763.75		1821.8	2008.9	1934.8	2083.1		3234.4	2397.3	2298.5	2496		3292.1	1183.4	912.18	1454.6		2326.7	1120.6	1055.7	1185.6		2988.4	385.96	131.92	640.01		3630	719.66	561.21	878.11
2256.3	995.68	739.2	1252.2		2103.7	682.29	602.11	762.46		1851.4	2006.7	1932.6	2080.7		3267.3	2394.6	2295.3	2494		3331.8	1186	911.09	1460.9		2366	1119.5	1054	1184.9		3017	386.91	132.59	641.22		3662.4	723.35	563.45	883.26
2290.4	994.95	738.73	1251.2		2134.3	681.74	602.29	761.19		1881	2004.5	1930.5	2078.6		3300.2	2392	2291.7	2492.3		3371.6	1188.7	910.21	1467.2		2405.3	1118.1	1052.2	1184		3045.6	387.87	133.29	642.46		3694.9	727.05	565.7	888.4
2324.5	994.21	738.22	1250.2		2164.9	681.21	602.49	759.93		1910.6	2002.6	1928.5	2076.6		3333.1	2389.3	2287.9	2490.7		3411.3	1191.5	909.53	1473.4		2444.6	1116.7	1050.3	1183		3074.2	388.87	134.02	643.72		3727.3	730.75	567.96	893.53
2358.6	993.47	737.65	1249.3		2195.5	680.7	602.71	758.7		1940.2	2000.7	1926.8	2074.7		3366	2386.7	2283.9	2489.4		3451	1194.3	909.07	1479.5		2483.8	1115.1	1048.2	1181.9		3102.8	389.9	134.78	645.02		3759.7	734.45	570.25	898.64
2392.6	992.72	737.03	1248.4		2226.1	680.22	602.94	757.49		1969.8	1999.1	1925.1	2073.1		3398.9	2384	2279.8	2488.2		3490.8	1197.2	908.84	1485.5		2523.1	1113.3	1046	1180.6		3131.5	390.95	135.57	646.33		3792.1	738.15	572.56	903.75
2426.7	991.95	736.35	1247.5		2256.8	679.75	603.17	756.32		1999.4	1997.6	1923.6	2071.5		3431.8	2381.4	2275.6	2487.2		3530.5	1200.1	908.86	1491.3		2562.4	1111.4	1043.7	1179.2		3160.1	392.04	136.4	647.67		3824.5	741.86	574.88	908.83
2460.8	991.15	735.6	1246.7		2287.4	679.3	603.4	755.19		2029	1996.2	1922.2	2070.2		3464.7	2378.8	2271.4	2486.3		3570.3	1203	909.16	1496.9		2601.7	1109.4	1041.3	1177.6		3188.7	393.15	137.27	649.04		3856.9	745.57	577.23	913.9
2494.8	990.34	734.78	1245.9		2318	678.86	603.62	754.1		2058.5	1995	1921	2069		3497.6	2376.3	2267.1	2485.5		3610	1206	909.75	1502.2		2641	1107.3	1038.7	1176		3217.3	394.3	138.18	650.42		3889.3	749.28	579.6	918.96
2528.9	989.49	733.88	1245.1		2348.6	678.45	603.83	753.06		2088.1	1993.9	1919.9	2067.9		3530.5	2373.8	2262.8	2484.8		3649.8	1209	910.61	1507.3		2680.3	1105.1	1036	1174.2		3245.9	395.48	139.14	651.81		3921.7	753	581.99	924
2563	988.6	732.9	1244.3		2379.2	678.05	604.02	752.07		2117.7	1993	1919	2067		3563.4	2371.3	2258.5	2484.1		3689.5	1212	911.72	1512.2		2719.5	1102.8	1033.2	1172.3		3274.5	396.68	140.14	653.23		3954.1	756.71	584.41	929.02
2597	987.68	731.83	1243.5		2409.8	677.66	604.19	751.13		2147.3	1992.2	1918.2	2066.3		3596.3	2368.8	2254.2	2483.4		3729.3	1215	913.08	1516.9		2758.8	1100.3	1030.3	1170.4		3303.2	397.92	141.19	654.65		3986.5	760.44	586.85	934.03
2631.1	986.7	730.66	1242.7		2440.4	677.29	604.34	750.24		2176.9	1991.6	1917.5	2065.7		3629.2	2366.4	2250	2482.8		3769	1218.1	914.66	1521.5		2798.1	1097.8	1027.3	1168.3		3331.8	399.2	142.3	656.09		4018.9	764.16	589.31	939.01
2665.2	985.68	729.4	1242		2471	676.94	604.47	749.41		2206.5	1991.1	1917	2065.3		3662.2	2364	2245.8	2482.1		3808.8	1221.1	916.44	1525.8		2837.4	1095.2	1024.3	1166.1		3360.4	400.5	143.45	657.55		4051.3	767.89	591.8	943.98
2699.3	984.59	728.04	1241.1		2501.6	676.6	604.56	748.63		2236.1	1990.8	1916.6	2065		3695.1	2361.6	2241.7	2481.4		3848.5	1224.2	918.42	1530		2876.7	1092.5	1021.1	1163.8		3389	401.84	144.67	659.01		4083.7	771.62	594.31	948.93
2733.3	983.45	726.58	1240.3		2532.3	676.27	604.63	747.91		2265.6	1990.6	1916.4	2064.8		3728	2359.2	2237.7	2480.7		3888.3	1227.3	920.58	1534		2916	1089.7	1017.9	1161.4		3417.6	403.21	145.94	660.48		4116.1	775.35	596.85	953.86
2767.4	982.23	725	1239.5		2562.9	675.95	604.65	747.25		2295.2	1990.6	1916.3	2064.8		3760.9	2356.8	2233.8	2479.9		3928	1230.4	922.9	1537.9		2955.2	1086.8	1014.6	1159		3446.2	404.62	147.28	661.96		4148.6	779.09	599.42	958.77
2801.5	980.95	723.32	1238.6		2593.5	675.65	604.64	746.65		2324.8	1990.7	1916.3	2065		3793.8	2354.5	2229.9	2479		3967.8	1233.5	925.37	1541.7		2994.5	1083.9	1011.3	1156.5		3474.9	406.06	148.67	663.45		4181	782.83	602.01	963.65
2835.5	979.59	721.53	1237.6		2624.1	675.35	604.59	746.12		2354.4	1990.9	1916.5	2065.3		3826.7	2352.1	2226.1	2478.1		4007.5	1236.6	927.99	1545.3		3033.8	1080.9	1007.9	1153.8		3503.5	407.54	150.13	664.94		4213.4	786.58	604.63	968.52
2869.6	978.14	719.61	1236.7		2654.7	675.07	604.49	745.64		2384	1991.3	1916.8	2065.8		3859.6	2349.8	2222.4	2477.1		4047.2	1239.8	930.75	1548.7		3073.1	1077.8	1004.5	1151.1		3532.1	409.05	151.66	666.44		4245.8	790.32	607.28	973.37
2903.7	976.61	717.58	1235.6		2685.3	674.79	604.35	745.24		2413.6	1991.8	1917.2	2066.4		3892.5	2347.5	2218.8	2476.1		4087	1242.9	933.64	1552.1		3112.4	1074.7	1001	1148.4		3560.7	410.6	153.25	667.94		4278.2	794.08	609.96	978.19
2937.7	974.98	715.43	1234.5		2715.9	674.53	604.16	744.9		2443.2	1992.4	1917.7	2067.1		3925.4	2345.1	2215.4	2474.9		4126.7	1246	936.66	1555.3		3151.7	1071.5	997.48	1145.5		3589.3	412.18	154.91	669.45		4310.6	797.83	612.67	982.99
2971.8	973.26	713.16	1233.4		2746.5	674.27	603.91	744.63		2472.7	1993.2	1918.4	2068		3958.3	2342.8	2212	2473.7		4166.5	1249.1	939.8	1558.4		3190.9	1068.3	993.96	1142.6		3617.9	413.8	156.65	670.96		4343	801.59	615.41	987.76
3005.9	971.43	710.76	1232.1		2777.2	674.02	603.62	744.42		2502.3	1994.1	1919.1	2069.1		3991.2	2340.5	2208.7	2472.3		4206.2	1252.2	943.07	1561.4		3230.2	1065	990.41	1139.7		3646.6	415.46	158.45	672.47		4375.4	805.35	618.18	992.52
3040	969.5	708.23	1230.8		2807.8	673.78	603.26	744.29		2531.9	1995.1	1920	2070.3		4024.1	2338.2	2205.5	2470.9		4246	1255.3	946.46	1564.1		3269.5	1061.7	986.87	1136.6		3675.2	417.16	160.33	673.99		4407.8	809.12	620.99	997.25
3074	967.45	705.58	1229.3		2838.4	673.54	602.86	744.22		2561.5	1996.3	1920.9	2071.6		4057	2335.9	2202.4	2469.3		4285.7	1258.4	950	1566.7		3308.8	1058.4	983.32	1133.5		3703.8	418.89	162.28	675.51		4440.2	812.89	623.82	1002
3108.1	965.28	702.79	1227.8		2869	673.3	602.39	744.22		2591.1	1997.5	1921.9	2073.2		4089.9	2333.5	2199.4	2467.7		4325.5	1261.4	953.68	1569.1		3348.1	1055.1	979.77	1130.4		3732.4	420.67	164.3	677.03		4472.6	816.66	626.69	1006.6
3142.2	962.99	699.87	1226.1		2899.6	673.08	601.87	744.29		2620.7	1998.9	1923	2074.8		4122.8	2331.2	2196.5	2466		4365.2	1264.4	957.52	1571.2		3387.4	1051.7	976.25	1127.2		3761	422.47	166.39	678.55		4505	820.44	629.59	1011.3
3176.2	960.57	696.81	1224.3		2930.2	672.85	601.28	744.42		2650.3	2000.4	1924.2	2076.7		4155.7	2328.9	2193.6	2464.2		4405	1267.3	961.53	1573.1		3426.6	1048.4	972.74	1124		3789.6	424.31	168.54	680.08		4537.4	824.22	632.52	1015.9
3210.3	958.02	693.62	1222.4		2960.8	672.63	600.64	744.62		2679.9	2002.1	1925.4	2078.7		4188.6	2326.5	2190.7	2462.3		4444.7	1270.2	965.73	1574.6		3465.9	1045	969.26	1120.7		3818.3	426.18	170.75	681.61		4569.9	828	635.49	1020.5
3244.4	955.33	690.29	1220.4		2991.4	672.41	599.93	744.89		2709.4	2003.8	1926.8	2080.9		4221.5	2324.1	2187.9	2460.3		4484.5	1273	970.12	1575.8		3505.2	1041.6	965.82	1117.4		3846.9	428.08	173.01	683.15		4602.3	831.79	638.49	1025.1
3278.4	952.5	686.84	1218.2		3022	672.19	599.17	745.22		2739	2005.7	1928.2	2083.2		4254.4	2321.7	2185.2	2458.2		4524.2	1275.7	974.73	1576.7		3544.5	1038.2	962.42	1114		3875.5	430	175.32	684.68		4634.7	835.58	641.53	1029.6
3312.5	949.57	683.29	1215.8		3052.7	671.98	598.35	745.61		2768.6	2007.7	1929.7	2085.7		4287.3	2319.3	2182.4	2456.1		4564	1278.3	979.57	1577.1		3583.8	1034.8	959.08	1110.6		3904.1	431.95	177.68	686.22		4667.1	839.38	644.6	1034.2
3346.6	946.52	679.65	1213.4		3083.3	671.76	597.46	746.06		2798.2	2009.8	1931.2	2088.4		4320.3	2316.8	2179.7	2453.9		4603.7	1280.8	984.65	1577		3623.1	1031.5	955.79	1107.2		3932.7	433.93	180.09	687.77		4699.5	843.18	647.71	1038.7
3380.7	943.38	675.95	1210.8		3113.9	671.55	596.52	746.57		2827.8	2012	1932.9	2091.2		4353.2	2314.3	2177	2451.7		4643.4	1283.3	989.99	1576.5		3662.3	1028.1	952.56	1103.7		3961.3	435.92	182.53	689.31		4731.9	846.98	650.85	1043.1
3414.7	940.16	672.21	1208.1		3144.5	671.33	595.52	747.14		2857.4	2014.4	1934.6	2094.1		4386.1	2311.8	2174.2	2449.4		4683.2	1285.6	995.58	1575.6		3701.6	1024.8	949.4	1100.2		3990	437.94	185.02	690.86		4764.3	850.79	654.03	1047.6
3448.8	936.87	668.45	1205.3		3175.1	671.11	594.46	747.76		2887	2016.8	1936.4	2097.3		4419	2309.2	2171.4	2447.1		4722.9	1287.8	1001.4	1574.2		3740.9	1021.5	946.32	1096.7		4018.6	439.97	187.53	692.42		4796.7	854.61	657.25	1052
3482.9	933.52	664.7	1202.3		3205.7	670.89	593.34	748.43		2916.5	2019.4	1938.2	2100.5		4451.9	2306.6	2168.6	2444.7		4762.7	1289.9	1007.4	1572.4		3780.2	1018.3	943.32	1093.2		4047.2	442.02	190.07	693.98		4829.1	858.42	660.51	1056.3
3516.9	930.13	660.96	1199.3		3236.3	670.66	592.17	749.16		2946.1	2022	1940.1	2103.9		4484.8	2304	2165.8	2442.2		4802.4	1292	1013.6	1570.4		3819.5	1015	940.4	1089.7		4075.8	444.09	192.63	695.54		4861.5	862.25	663.8	1060.7
3551	926.7	657.27	1196.1		3266.9	670.43	590.94	749.93		2975.7	2024.8	1942.1	2107.5		4517.7	2301.3	2162.9	2439.7		4842.2	1294	1020	1568.1		3858.8	1011.8	937.53	1086.1		4104.4	446.16	195.21	697.11		4893.9	866.07	667.14	1065
3585.1	923.24	653.65	1192.8		3297.5	670.2	589.66	750.75		3005.3	2027.7	1944.2	2111.2		4550.6	2298.6	2159.9	2437.2		4881.9	1296	1026.4	1565.6		3898	1008.6	934.67	1082.5		4133	448.25	197.81	698.69		4926.3	869.9	670.51	1069.3
3619.2	919.78	650.11	1189.4		3328.2	669.96	588.32	751.61		3034.9	2030.7	1946.3	2115		4583.5	2295.8	2156.8	2434.7		4921.7	1298	1033	1563		3937.3	1005.3	931.81	1078.8		4161.7	450.34	200.42	700.27		4958.7	873.74	673.92	1073.6
3653.2	916.32	646.69	1185.9		3358.8	669.72	586.93	752.51		3064.5	2033.8	1948.6	2119		4616.4	2292.9	2153.7	2432.1		4961.4	1299.9	1039.6	1560.3		3976.6	1002	928.92	1075		4190.3	452.45	203.04	701.85		4991.1	877.58	677.37	1077.8
3687.3	912.87	643.4	1182.3		3389.4	669.47	585.49	753.45		3094.1	2037	1950.9	2123.1		4649.3	2290	2150.5	2429.5		5001.2	1301.9	1046.2	1557.6		4015.9	998.59	926.02	1071.2		4218.9	454.55	205.66	703.44		5023.6	881.42	680.87	1082
3721.4	909.44	640.24	1178.6		3420	669.21	584	754.43		3123.6	2040.3	1953.3	2127.3		4682.2	2287	2147.2	2426.9		5040.9	1303.9	1052.7	1555.1		4055.2	995.19	923.11	1067.3		4247.5	456.66	208.28	705.04		5056	885.27	684.4	1086.1
3755.4	906.05	637.23	1174.9		3450.6	668.95	582.47	755.44		3153.2	2043.7	1955.8	2131.6		4715.1	2284	2143.7	2424.2		5080.7	1305.9	1059.2	1552.6		4094.5	991.77	920.2	1063.3		4276.1	458.77	210.9	706.64		5088.4	889.12	687.97	1090.3
3789.5	902.72	634.36	1171.1		3481.2	668.68	580.88	756.48		3182.8	2047.2	1958.4	2136.1		4748	2280.9	2140.2	2421.5		5120.4	1308	1065.6	1550.4		4133.7	988.35	917.3	1059.4		4304.7	460.88	213.51	708.26		5120.8	892.98	691.59	1094.4
3823.6	899.44	631.64	1167.2		3511.8	668.41	579.26	757.55		3212.4	2050.8	1961	2140.7		4780.9	2277.7	2136.6	2418.9		5160.2	1310.1	1071.9	1548.4		4173	984.94	914.42	1055.5		4333.4	462.99	216.11	709.87		5153.2	896.84	695.25	1098.4
3857.6	896.23	629.06	1163.4		3542.4	668.12	577.59	758.65		3242	2054.5	1963.8	2145.3		4813.8	2274.6	2132.9	2416.2		5199.9	1312.3	1077.9	1546.7		4212.3	981.56	911.56	1051.6		4362	465.1	218.7	711.5		5185.6	900.71	698.95	1102.5
3891.7	893.08	626.64	1159.5		3573.1	667.83	575.88	759.78		3271.6	2058.4	1966.6	2150.1		4846.7	2271.4	2129.2	2413.6		5239.6	1314.5	1083.7	1545.4		4251.6	978.21	908.74	1047.7		4390.6	467.2	221.27	713.12		5218	904.58	702.69	1106.5
3925.8	890.01	624.36	1155.7		3603.7	667.53	574.13	760.93		3301.2	2062.3	1969.6	2154.9		4879.6	2268.2	2125.4	2410.9		5279.4	1316.8	1089.1	1544.4		4290.9	974.9	905.96	1043.9		4419.2	469.29	223.81	714.76		5250.4	908.46	706.48	1110.4
3959.9	887	622.23	1151.8		3634.3	667.23	572.35	762.1		3330.7	2066.3	1972.7	2159.9		4912.5	2265	2121.6	2408.3		5319.1	1319	1094.2	1543.7		4330.2	971.66	903.23	1040.1		4447.8	471.37	226.33	716.4		5282.8	912.34	710.31	1114.4
3993.9	884.06	620.24	1147.9		3664.9	666.91	570.53	763.29		3360.3	2070.4	1975.9	2164.9		4945.4	2261.8	2117.8	2405.8		5358.9	1321.2	1098.9	1543.4		4369.4	968.49	900.56	1036.4		4476.4	473.44	228.83	718.05		5315.2	916.22	714.18	1118.3
4028	881.18	618.39	1144		3695.5	666.59	568.67	764.5		3389.9	2074.6	1979.1	2170		4978.3	2258.6	2113.9	2403.3		5398.6	1323.4	1103.2	1543.5		4408.7	965.41	897.97	1032.8		4505.1	475.49	231.29	719.7		5347.6	920.12	718.1	1122.1
4062.1	878.37	616.68	1140.1		3726.1	666.25	566.79	765.72		3419.5	2078.9	1982.5	2175.2		5011.3	2255.5	2110.1	2400.9		5438.4	1325.5	1107	1544		4448	962.42	895.45	1029.4		4533.7	477.53	233.71	721.35		5380	924.01	722.06	1126
4096.1	875.63	615.11	1136.1		3756.7	665.91	564.87	766.96		3449.1	2083.2	1986	2180.4		5044.2	2252.4	2106.3	2398.5		5478.1	1327.6	1110.3	1544.9		4487.3	959.54	893.03	1026.1		4562.3	479.56	236.1	723.01		5412.4	927.91	726.07	1129.8
4130.2	872.94	613.68	1132.2		3787.3	665.56	562.92	768.21		3478.7	2087.7	1989.7	2185.8		5077.1	2249.4	2102.6	2396.2		5517.9	1329.6	1113.1	1546.1		4526.6	956.79	890.7	1022.9		4590.9	481.56	238.44	724.67		5444.9	931.82	730.12	1133.5
4164.3	870.32	612.39	1128.3		3817.9	665.2	560.94	769.46		3508.3	2092.3	1993.4	2191.1		5110	2246.4	2098.9	2394		5557.6	1331.5	1115.4	1547.7		4565.9	954.17	888.49	1019.8		4619.5	483.54	240.75	726.34		5477.3	935.73	734.21	1137.2
4198.3	867.76	611.23	1124.3		3848.6	664.83	558.94	770.72		3537.9	2096.9	1997.3	2196.6		5142.9	2243.6	2095.3	2391.9		5597.4	1333.4	1117.2	1549.6		4605.1	951.69	886.4	1017		4648.1	485.5	243	728		5509.7	939.65	738.36	1140.9
4232.4	865.27	610.2	1120.3		3879.2	664.45	556.92	771.99		3567.4	2101.7	2001.3	2202.1		5175.8	2240.8	2091.7	2389.8		5637.1	1335.1	1118.5	1551.7		4644.4	949.38	884.44	1014.3		4676.8	487.44	245.21	729.67		5542.1	943.57	742.54	1144.6
4266.5	862.83	609.29	1116.4		3909.8	664.06	554.87	773.26		3597	2106.5	2005.4	2207.6		5208.7	2238.1	2088.3	2387.9		5676.9	1336.7	1119.3	1554.1		4683.7	947.24	882.62	1011.8		4705.4	489.35	247.37	731.33		5574.5	947.5	746.78	1148.2
4300.6	860.46	608.52	1112.4		3940.4	663.66	552.79	774.53		3626.6	2111.4	2009.7	2213.2		5241.6	2235.5	2085	2386.1		5716.6	1338.2	1119.7	1556.7		4723	945.26	880.95	1009.6		4734	491.23	249.47	732.99		5606.9	951.43	751.06	1151.8
4334.6	858.15	607.86	1108.4		3971	663.25	550.7	775.8		3656.2	2116.4	2014.1	2218.8		5274.5	2233.1	2081.9	2384.3		5756.4	1339.6	1119.8	1559.5		4762.3	943.46	879.4	1007.5		4762.6	493.08	251.52	734.65		5639.3	955.37	755.39	1155.3
4368.7	855.89	607.33	1104.5		4001.6	662.83	548.59	777.06		3685.8	2121.5	2018.6	2224.4		5307.4	2230.8	2078.8	2382.7		5796.1	1340.9	1119.4	1562.4		4801.6	941.82	877.99	1005.6		4791.2	494.9	253.51	736.3		5671.7	959.31	759.76	1158.9
4402.8	853.7	606.91	1100.5		4032.2	662.39	546.46	778.32		3715.4	2126.6	2023.2	2230.1		5340.3	2228.6	2076	2381.3		5835.8	1342.1	1118.8	1565.3		4840.8	940.34	876.71	1004		4819.8	496.69	255.43	737.95		5704.1	963.26	764.18	1162.3
4436.8	851.56	606.61	1096.5		4062.8	661.95	544.32	779.58		3745	2131.9	2028	2235.8		5373.2	2226.6	2073.4	2379.9		5875.6	1343.1	1117.9	1568.3		4880.1	939.03	875.54	1002.5		4848.5	498.44	257.3	739.58		5736.5	967.21	768.65	1165.8
4470.9	849.48	606.43	1092.5		4093.5	661.49	542.16	780.82		3774.5	2137.1	2032.8	2241.5		5406.1	2224.8	2070.9	2378.7		5915.3	1344	1116.7	1571.3		4919.4	937.88	874.5	1001.3		4877.1	500.15	259.1	741.21		5768.9	971.17	773.17	1169.2
4505	847.45	606.35	1088.6		4124.1	661.02	539.99	782.05		3804.1	2142.5	2037.8	2247.2		5439	2223.2	2068.7	2377.6		5955.1	1344.7	1115.3	1574.1		4958.7	936.89	873.58	1000.2		4905.7	501.83	260.84	742.82		5801.3	975.14	777.73	1172.5
4539.1	845.49	606.37	1084.6		4154.7	660.54	537.81	783.27		3833.7	2147.8	2042.8	2252.9		5471.9	2221.7	2066.7	2376.7		5994.8	1345.3	1113.7	1576.9		4998	936.05	872.77	999.33		4934.3	503.46	262.51	744.41		5833.7	979.11	782.34	1175.9
4573.1	843.58	606.5	1080.7		4185.3	660.05	535.62	784.47		3863.3	2153.2	2047.9	2258.5		5504.8	2220.4	2064.9	2376		6034.6	1345.8	1112	1579.5		5037.3	935.37	872.07	998.67		4962.9	505.05	264.11	745.99		5866.1	983.09	787	1179.2
4607.2	841.72	606.73	1076.7		4215.9	659.54	533.42	785.66		3892.9	2158.7	2053.1	2264.2		5537.7	2219.4	2063.4	2375.4		6074.3	1346.1	1110.2	1582		5076.5	934.84	871.48	998.2		4991.5	506.6	265.65	747.55		5898.6	987.07	791.71	1182.4
4641.3	839.92	607.05	1072.8		4246.5	659.02	531.21	786.83		3922.5	2164.1	2058.4	2269.8		5570.6	2218.5	2062.2	2374.9		6114.1	1346.3	1108.4	1584.1		5115.8	934.46	871	997.93		5020.2	508.09	267.11	749.08		5931	991.06	796.46	1185.7
4675.3	838.17	607.46	1068.9		4277.1	658.49	529	787.97		3952.1	2169.6	2063.7	2275.4		5603.5	2217.9	2061.1	2374.6		6153.8	1346.2	1106.5	1586		5155.1	934.24	870.62	997.85		5048.8	509.55	268.5	750.59		5963.4	995.05	801.26	1188.8
4709.4	836.47	607.97	1065		4307.7	657.94	526.78	789.1		3981.6	2175	2069.1	2281		5636.4	2217.4	2060.4	2374.4		6193.6	1346.1	1104.6	1587.6		5194.4	934.16	870.36	997.96		5077.4	510.94	269.82	752.07		5995.8	999.05	806.11	1192
4743.5	834.83	608.56	1061.1		4338.3	657.38	524.56	790.19		4011.2	2180.5	2074.5	2286.5		5669.4	2217.1	2059.9	2374.4		6233.3	1345.8	1102.8	1588.7		5233.7	934.22	870.2	998.25		5106	512.29	271.07	753.52		6028.2	1003.1	811.01	1195.1
4777.5	833.24	609.22	1057.2		4369	656.8	522.34	791.27		4040.8	2186	2079.9	2292		5702.3	2217.1	2059.6	2374.5		6273.1	1345.3	1101	1589.5		5273	934.43	870.14	998.72		5134.6	513.59	272.24	754.93		6060.6	1007.1	815.96	1198.2
4811.6	831.7	609.97	1053.4		4399.6	656.21	520.12	792.31		4070.4	2191.4	2085.4	2297.3		5735.2	2217.2	2059.6	2374.8		6312.8	1344.6	1099.4	1589.8		5312.2	934.78	870.2	999.37		5163.2	514.82	273.34	756.31		6093	1011.1	820.95	1201.2
4845.7	830.21	610.79	1049.6		4430.2	655.61	517.9	793.32		4100	2196.8	2090.9	2302.7		5768.1	2217.5	2059.9	2375.2		6352.6	1343.8	1097.9	1589.7		5351.5	935.28	870.36	1000.2		5191.9	516.01	274.37	757.64		6125.4	1015.1	826	1204.2
4879.8	828.77	611.68	1045.9		4460.8	654.99	515.68	794.3		4129.6	2202.2	2096.5	2307.9		5801	2218.1	2060.4	2375.8		6392.3	1342.9	1096.5	1589.3		5390.8	935.91	870.63	1001.2		5220.5	517.13	275.32	758.93		6157.8	1019.1	831.08	1207.2
4913.8	827.37	612.63	1042.1		4491.4	654.36	513.46	795.25		4159.2	2207.5	2102	2313		5833.9	2218.8	2061.1	2376.5		6432.1	1341.8	1095.2	1588.5		5430.1	936.67	871.01	1002.3		5249.1	518.19	276.19	760.18		6190.2	1023.2	836.22	1210.1
4947.9	826.03	613.65	1038.4		4522	653.71	511.25	796.16		4188.8	2212.8	2107.5	2318.1		5866.8	2219.7	2062.1	2377.3		6471.8	1340.7	1094.1	1587.4		5469.4	937.57	871.5	1003.6		5277.7	519.18	276.99	761.37		6222.6	1027.2	841.41	1213
4982	824.74	614.72	1034.8		4552.6	653.04	509.05	797.03		4218.3	2218	2113	2323		5899.7	2220.8	2063.3	2378.3		6511.5	1339.5	1093	1586		5508.7	938.6	872.1	1005.1		5306.3	520.11	277.72	762.51		6255	1031.3	846.64	1215.9
5016	823.49	615.84	1031.1		4583.2	652.36	506.85	797.87		4247.9	2223.2	2118.6	2327.8		5932.6	2222.1	2064.6	2379.6		6551.3	1338.2	1092	1584.3		5547.9	939.74	872.82	1006.7		5334.9	520.98	278.37	763.59		6287.4	1035.3	851.91	1218.7
5050.1	822.29	617.01	1027.6		4613.8	651.66	504.67	798.66		4277.5	2228.3	2124	2332.5		5965.5	2223.6	2066.2	2381		6591	1336.8	1091.2	1582.4		5587.2	941	873.64	1008.4		5363.6	521.77	278.94	764.6		6319.9	1039.4	857.24	1221.5
5084.2	821.14	618.22	1024.1		4644.5	650.95	502.49	799.41		4307.1	2233.3	2129.5	2337.1		5998.4	2225.3	2067.9	2382.6		6630.8	1335.3	1090.4	1580.2		5626.5	942.36	874.57	1010.1		5392.2	522.5	279.45	765.55		6352.3	1043.4	862.61	1224.3
5118.2	820.03	619.47	1020.6		4675.1	650.22	500.32	800.12		4336.7	2238.2	2134.9	2341.5		6031.3	2227.1	2069.8	2384.5		6670.5	1333.7	1089.7	1577.8		5665.8	943.82	875.61	1012		5420.8	523.15	279.87	766.43		6384.7	1047.5	868.02	1227
5152.3	818.97	620.75	1017.2		4705.7	649.47	498.17	800.78		4366.3	2243.1	2140.3	2345.8		6064.2	2229.2	2071.8	2386.6		6710.3	1332.1	1089.1	1575.1		5705.1	945.38	876.77	1014		5449.4	523.73	280.22	767.24		6417.1	1051.6	873.48	1229.7
5186.4	817.95	622.06	1013.8		4736.3	648.71	496.03	801.39		4395.9	2247.8	2145.7	2349.9		6097.1	2231.5	2074	2388.9		6750	1330.3	1088.5	1572.1		5744.4	947.03	878.03	1016		5478	524.23	280.5	767.96		6449.5	1055.7	878.98	1232.4
5220.5	816.97	623.39	1010.6		4766.9	647.93	493.9	801.95		4425.4	2252.4	2151	2353.8		6130	2233.9	2076.3	2391.5		6789.8	1328.5	1088.1	1568.9		5783.6	948.76	879.4	1018.1		5506.6	524.66	280.7	768.61		6481.9	1059.8	884.53	1235
5254.5	816.04	624.73	1007.3		4797.5	647.13	491.79	802.46		4455	2256.9	2156.1	2357.6		6162.9	2236.5	2078.7	2394.4		6829.5	1326.5	1087.7	1565.3		5822.9	950.56	880.88	1020.2		5535.3	525	280.84	769.17		6514.3	1063.9	890.12	1237.6
5288.6	815.15	626.09	1004.2		4828.1	646.31	489.7	802.92		4484.6	2261.1	2161.2	2361.1		6195.8	2239.3	2081.2	2397.5		6869.3	1324.5	1087.5	1561.5		5862.2	952.44	882.47	1022.4		5563.9	525.27	280.89	769.64		6546.7	1068	895.75	1240.2
5322.7	814.3	627.45	1001.1		4858.7	645.47	487.62	803.32		4514.2	2265.3	2166.1	2364.4		6228.7	2242.3	2083.8	2400.9		6909	1322.3	1087.3	1557.3		5901.5	954.39	884.18	1024.6		5592.5	525.45	280.89	770.02		6579.1	1072.1	901.42	1242.8
5356.7	813.49	628.81	998.18		4889.4	644.62	485.57	803.67		4543.8	2269.2	2170.9	2367.4		6261.6	2245.5	2086.4	2404.5		6948.8	1320	1087.2	1552.8		5940.8	956.44	886.02	1026.9		5621.1	525.56	280.81	770.32		6611.5	1076.2	907.13	1245.3
5390.8	812.72	630.16	995.29		4920	643.75	483.53	803.96		4573.4	2272.8	2175.4	2370.2		6294.5	2248.8	2089.2	2408.5		6988.5	1317.6	1087.2	1548		5980.1	958.59	888	1029.2		5649.7	525.6	280.67	770.53		6643.9	1080.3	912.88	1247.8
5424.9	812	631.49	992.5		4950.6	642.85	481.51	804.2		4603	2276.3	2179.8	2372.7		6327.5	2252.4	2092	2412.8		7028.3	1315.1	1087.3	1542.9		6019.3	960.84	890.13	1031.6		5678.3	525.56	280.47	770.65		6676.3	1084.5	918.66	1250.3
5459	811.31	632.81	989.81		4981.2	641.94	479.52	804.37		4632.5	2279.4	2184	2374.9		6360.4	2256.1	2094.9	2417.3		7068	1312.4	1087.3	1537.5		6058.6	963.21	892.4	1034		5707	525.44	280.2	770.68		6708.7	1088.6	924.48	1252.8
5493	810.66	634.1	987.22		5011.8	641.01	477.55	804.48		4662.1	2282.3	2187.9	2376.7		6393.3	2260	2097.8	2422.2		7107.7	1309.7	1087.4	1532		6097.9	965.7	894.82	1036.6		5735.6	525.26	279.88	770.63		6741.1	1092.8	930.34	1255.2
5527.1	810.05	635.35	984.75		5042.4	640.06	475.6	804.52		4691.7	2284.9	2191.6	2378.2		6426.2	2264.1	2100.8	2427.3		7147.5	1306.9	1087.6	1526.3		6137.2	968.33	897.41	1039.2		5764.2	525	279.51	770.49		6773.6	1096.9	936.22	1257.6
5561.2	809.47	636.56	982.39		5073	639.09	473.68	804.51		4721.3	2287.2	2194.9	2379.4		6459.1	2268.3	2103.9	2432.7		7187.2	1304.2	1087.9	1520.5		6176.5	971.09	900.16	1042		5792.8	524.67	279.08	770.27		6806	1101.1	942.14	1260
5595.2	808.94	637.72	980.16		5103.6	638.1	471.78	804.42		4750.9	2289.1	2198	2380.1		6492	2272.7	2106.9	2438.4		7227	1301.5	1088.3	1514.8		6215.8	973.99	903.09	1044.9		5821.4	524.28	278.59	769.96		6838.4	1105.2	948.09	1262.4
5629.3	808.44	638.82	978.05		5134.2	637.09	469.91	804.27		4780.5	2290.6	2200.8	2380.5		6524.9	2277.2	2110	2444.3		7266.7	1299	1088.9	1509.1		6255	977.06	906.2	1047.9		5850	523.82	278.06	769.57		6870.8	1109.4	954.06	1264.8
5663.4	807.97	639.86	976.08		5164.9	636.06	468.07	804.05		4810.1	2291.8	2203.2	2380.4		6557.8	2281.8	2113.2	2450.5		7306.5	1296.6	1089.7	1503.5		6294.3	980.28	909.5	1051.1		5878.7	523.29	277.48	769.09		6903.2	1113.6	960.05	1267.2
5697.4	807.54	640.82	974.26		5195.5	635.01	466.25	803.76		4839.7	2292.6	2205.2	2379.9		6590.7	2286.6	2116.3	2456.9		7346.2	1294.4	1090.8	1498.1		6333.6	983.67	912.99	1054.4		5907.3	522.69	276.85	768.53		6935.6	1117.8	966.07	1269.5
5731.5	807.14	641.7	972.58		5226.1	633.93	464.46	803.41		4869.2	2292.9	2206.9	2378.9		6623.6	2291.6	2119.6	2463.6		7386	1292.4	1092	1492.9		6372.9	987.25	916.68	1057.8		5935.9	522.04	276.18	767.89		6968	1122	972.1	1271.9
5765.6	806.78	642.5	971.06		5256.7	632.84	462.7	802.97		4898.8	2292.8	2208.2	2377.5		6656.5	2296.6	2122.8	2470.4		7425.7	1290.7	1093.5	1487.9		6412.2	991	920.57	1061.4		5964.5	521.32	275.47	767.17		7000.4	1126.2	978.15	1274.2
5799.7	806.45	643.19	969.7		5287.3	631.72	460.97	802.47		4928.4	2292.3	2209	2375.6		6689.4	2301.8	2126	2477.5		7465.5	1289.3	1095.3	1483.2		6451.5	994.95	924.69	1065.2		5993.1	520.54	274.71	766.36		7032.8	1130.4	984.2	1276.6
5833.7	806.15	643.79	968.51		5317.9	630.58	459.27	801.89		4958	2291.3	2209.4	2373.2		6722.3	2307	2129.3	2484.7		7505.2	1288.1	1097.3	1478.8		6490.7	999.11	929.02	1069.2		6021.7	519.7	273.91	765.48		7065.2	1134.6	990.26	1279
5867.8	805.88	644.26	967.5		5348.5	629.42	457.6	801.24		4987.6	2289.8	2209.3	2370.3		6755.2	2312.4	2132.7	2492.1		7545	1287.3	1099.7	1474.9		6530	1003.5	933.57	1073.4		6050.4	518.8	273.08	764.52		7097.6	1138.8	996.31	1281.3
5901.9	805.65	644.62	966.67		5379.1	628.24	455.96	800.51		5017.2	2287.8	2208.7	2367		6788.1	2317.8	2136	2499.6		7584.7	1286.8	1102.3	1471.3		6569.3	1008	938.34	1077.7		6079	517.84	272.2	763.48		7130	1143	1002.3	1283.7
5935.9	805.44	644.85	966.04		5409.8	627.03	454.35	799.71		5046.8	2285.3	2207.6	2363.1		6821	2323.3	2139.4	2507.3		7624.5	1286.7	1105.2	1468.2		6608.6	1012.7	943.3	1082.2		6107.6	516.83	271.29	762.37		7162.4	1147.2	1008.3	1286
5970	805.27	644.94	965.59		5440.4	625.8	452.77	798.83		5076.3	2282.3	2206	2358.7		6853.9	2328.9	2142.8	2515		7664.2	1287	1108.5	1465.5		6647.9	1017.7	948.46	1086.8		6136.2	515.76	270.35	761.17		7194.9	1151.3	1014.2	1288.4
6004.1	805.12	644.89	965.35		5471	624.55	451.22	797.87		5105.9	2278.8	2203.8	2353.8		6886.8	2334.6	2146.3	2522.9		7703.9	1287.7	1112.1	1463.4		6687.2	1022.7	953.8	1091.7		6164.8	514.64	269.37	759.91		7227.3	1155.3	1019.9	1290.7
6038.1	805	644.69	965.32		5501.6	623.28	449.71	796.85		5135.5	2274.8	2201.2	2348.5		6919.7	2340.3	2149.8	2530.9		7743.7	1288.9	1115.9	1461.8		6726.4	1028	959.3	1096.6		6193.4	513.47	268.36	758.57		7259.7	1159.3	1025.6	1292.9
6072.2	804.92	644.33	965.5		5532.2	621.99	448.23	795.75		5165.1	2270.5	2198.1	2342.8		6952.6	2346.1	2153.4	2538.9		7783.4	1290.4	1120.1	1460.7		6765.7	1033.4	964.97	1101.8		6222.1	512.24	267.32	757.16		7292.1	1163.1	1031.1	1295.1
6106.3	804.85	643.81	965.9		5562.8	620.69	446.78	794.59		5194.7	2265.7	2194.6	2336.8		6985.5	2352	2157	2547		7823.2	1292.3	1124.5	1460.1		6805	1038.9	970.79	1107		6250.7	510.97	266.25	755.68		7324.5	1166.9	1036.5	1297.3
6140.4	804.82	643.12	966.52		5593.4	619.37	445.38	793.37		5224.3	2260.6	2190.8	2330.5		7018.5	2357.9	2160.6	2555.1		7862.9	1294.7	1129.2	1460.1		6844.3	1044.6	976.75	1112.4		6279.3	509.64	265.16	754.13		7356.9	1170.6	1041.7	1299.4
6174.4	804.81	642.25	967.36		5624	618.05	444.01	792.09		5253.9	2255.2	2186.6	2323.9		7051.4	2363.8	2164.4	2563.2		7902.7	1297.4	1134.2	1460.6		6883.6	1050.4	982.85	1117.9		6307.9	508.27	264.03	752.51		7389.3	1174.1	1046.8	1301.5
6208.5	804.82	641.21	968.44		5654.6	616.72	442.69	790.76		5283.4	2249.6	2182.2	2317.1		7084.3	2369.7	2168.1	2571.3		7942.4	1300.5	1139.4	1461.6		6922.9	1056.3	989.07	1123.6		6336.5	506.85	262.88	750.82		7421.7	1177.5	1051.6	1303.5
6242.6	804.86	639.98	969.75		5685.3	615.39	441.41	789.38		5313	2243.8	2177.4	2310.1		7117.2	2375.7	2172	2579.4		7982.2	1304	1144.8	1463.1		6962.1	1062.4	995.42	1129.3		6365.1	505.39	261.71	749.07		7454.1	1180.8	1056.1	1305.4
6276.6	804.93	638.56	971.29		5715.9	614.06	440.18	787.94		5342.6	2237.7	2172.5	2303		7150.1	2381.7	2175.9	2587.4		8021.9	1307.8	1150.4	1465.2		7001.4	1068.5	1001.9	1135.2		6393.8	503.88	260.51	747.25		7486.5	1183.8	1060.5	1307.2
6310.7	805.02	636.96	973.08		5746.5	612.73	439	786.47		5372.2	2231.6	2167.4	2295.8		7183	2387.6	2179.8	2595.4		8061.7	1312	1156.3	1467.7		7040.7	1074.8	1008.4	1141.2		6422.4	502.33	259.3	745.37		7518.9	1186.7	1064.5	1309
6344.8	805.13	635.16	975.1		5777.1	611.41	437.87	784.95		5401.8	2225.3	2162	2288.5		7215.9	2393.6	2183.9	2603.4		8101.4	1316.4	1162.2	1470.6		7080	1081.2	1015.1	1147.3		6451	500.74	258.06	743.43		7551.3	1189.4	1068.3	1310.6
6378.8	805.26	633.16	977.36		5807.7	610.09	436.8	783.39		5431.4	2218.9	2156.6	2281.2		7248.8	2399.6	2188	2611.2		8141.2	1321.2	1168.3	1474		7119.3	1087.7	1021.9	1153.6		6479.6	499.11	256.8	741.43		7583.7	1191.9	1071.7	1312.2
6412.9	805.41	630.96	979.85		5838.3	608.79	435.78	781.79		5461	2212.4	2150.9	2273.8		7281.7	2405.5	2192.2	2618.9		8180.9	1326.2	1174.5	1477.8		7158.6	1094.4	1028.8	1160		6508.2	497.44	255.52	739.37		7616.1	1194.2	1074.8	1313.6
6447	805.57	628.56	982.57		5868.9	607.49	434.83	780.16		5490.6	2205.9	2145.2	2266.5		7314.6	2411.5	2196.4	2626.6		8220.7	1331.5	1180.9	1482.1		7197.8	1101.1	1035.7	1166.5		6536.8	495.73	254.22	737.25		7648.6	1196.3	1077.6	1314.9
6481.1	805.73	625.95	985.51		5899.5	606.21	433.94	778.49		5520.1	2199.3	2139.4	2259.2		7347.5	2417.4	2200.7	2634		8260.4	1337	1187.3	1486.7		7237.1	1107.9	1042.8	1173.1		6565.5	493.99	252.91	735.07		7681	1198	1080	1316.1
6515.1	805.89	623.13	988.65		5930.1	604.95	433.12	776.79		5549.7	2192.7	2133.5	2251.9		7380.4	2423.3	2205.2	2641.3		8300.1	1342.9	1193.9	1491.8		7276.4	1114.9	1049.9	1179.8		6594.1	492.21	251.58	732.84		7713.4	1199.6	1082.1	1317.1
6549.2	806.05	620.11	992		5960.8	603.72	432.37	775.06		5579.3	2186.2	2127.6	2244.7		7413.3	2429.1	2209.7	2648.5		8339.9	1349	1200.6	1497.4		7315.7	1121.9	1057.2	1186.6		6622.7	490.4	250.24	730.56		7745.8	1200.9	1083.7	1318
6583.3	806.2	616.87	995.53		5991.4	602.5	431.69	773.31		5608.9	2179.7	2121.7	2237.6		7446.2	2434.9	2214.2	2655.5		8379.6	1355.3	1207.3	1503.3		7355	1129	1064.5	1193.6		6651.3	488.55	248.88	728.22		7778.2	1201.8	1084.9	1318.8
6617.3	806.33	613.42	999.25		6022	601.31	431.1	771.52		5638.5	2173.2	2115.8	2230.7		7479.1	2440.6	2218.9	2662.2		8419.4	1361.9	1214.1	1509.7		7394.3	1136.3	1071.9	1200.6		6679.9	486.67	247.51	725.83		7810.6	1202.5	1085.7	1319.3
6651.4	806.45	609.76	1003.1		6052.6	600.15	430.59	769.72		5668.1	2166.8	2109.9	2223.8		7512	2446.2	2223.7	2668.8		8459.1	1368.7	1220.9	1516.5		7433.5	1143.6	1079.3	1207.8		6708.5	484.76	246.13	723.4		7843	1202.9	1086	1319.7
6685.5	806.53	605.88	1007.2		6083.2	599.02	430.16	767.88		5697.7	2160.6	2104	2217.1		7544.9	2451.8	2228.5	2675.1		8498.9	1375.7	1227.7	1523.7		7472.8	1151	1086.9	1215		6737.2	482.83	244.74	720.91		7875.4	1202.9	1085.9	1319.9
6719.6	806.58	601.8	1011.4		6113.8	597.93	429.83	766.03		5727.2	2154.4	2098.2	2210.6		7577.8	2457.3	2233.4	2681.2		8538.6	1382.8	1234.4	1531.2		7512.1	1158.4	1094.5	1222.4		6765.8	480.86	243.33	718.39		7907.8	1202.6	1085.3	1319.9
6753.6	806.6	597.5	1015.7		6144.4	596.87	429.6	764.15		5756.8	2148.4	2092.6	2204.3		7610.7	2462.7	2238.5	2687		8578.4	1390.1	1241.1	1539.1		7551.4	1166	1102.2	1229.8		6794.4	478.87	241.92	715.81		7940.2	1202	1084.2	1319.7
6787.7	806.58	593	1020.2		6175	595.86	429.46	762.25		5786.4	2142.6	2087	2198.2		7643.6	2468.1	2243.6	2692.6		8618.1	1397.5	1247.7	1547.3		7590.7	1173.7	1110	1237.3		6823	476.85	240.51	713.19		7972.6	1201	1082.6	1319.3
6821.8	806.5	588.29	1024.7		6205.7	594.88	429.43	760.33		5816	2136.9	2081.5	2192.3		7676.6	2473.3	2248.7	2697.8		8657.9	1405	1254.1	1555.8		7630	1181.4	1117.8	1244.9		6851.6	474.81	239.08	710.53		8005	1199.6	1080.5	1318.6
6855.8	806.38	583.36	1029.4		6236.3	593.95	429.51	758.39		5845.6	2131.4	2076.2	2186.6		7709.5	2478.3	2254	2702.7		8697.6	1412.4	1260.4	1564.5		7669.2	1189.1	1125.7	1252.5		6880.2	472.74	237.65	707.84		8037.4	1197.8	1077.9	1317.7
6889.9	806.19	578.23	1034.2		6266.9	593.07	429.71	756.43		5875.2	2125.9	2070.9	2181		7742.4	2483.3	2259.2	2707.3		8737.4	1419.9	1266.4	1573.4		7708.5	1196.8	1133.6	1260		6908.9	470.66	236.21	705.1		8069.9	1195.6	1074.8	1316.5
6924	805.95	572.9	1039		6297.5	592.24	430.02	754.46		5904.8	2120.6	2065.7	2175.5		7775.3	2488	2264.4	2711.5		8777.1	1427.2	1272.1	1582.4		7747.8	1204.4	1141.4	1267.5		6937.5	468.55	234.78	702.32		8102.3	1193.2	1071.2	1315.1
6958	805.63	567.37	1043.9		6328.1	591.46	430.45	752.47		5934.3	2115.4	2060.6	2170.2		7808.2	2492.4	2269.5	2715.4		8816.9	1434.5	1277.5	1591.4		7787.1	1212	1149.1	1274.9		6966.1	466.42	233.33	699.51		8134.7	1190.4	1067.3	1313.6
6992.1	805.26	561.65	1048.9		6358.7	590.73	430.99	750.48		5963.9	2110.3	2055.6	2165		7841.1	2496.7	2274.6	2718.8		8856.6	1441.6	1282.6	1600.5		7826.4	1219.4	1156.7	1282.1		6994.7	464.28	231.89	696.67		8167.1	1187.4	1063	1311.9
7026.2	804.82	555.78	1053.9		6389.3	590.06	431.64	748.48		5993.5	2105.2	2050.6	2159.8		7874	2500.6	2279.5	2721.7		8896.3	1448.4	1287.4	1609.4		7865.7	1226.6	1164.1	1289.1		7023.3	462.12	230.44	693.79		8199.5	1184.2	1058.4	1310.1
7060.3	804.33	549.75	1058.9		6419.9	589.45	432.4	746.49		6023.1	2100.2	2045.7	2154.8		7906.9	2504.2	2284.2	2724.2		8936.1	1455	1291.8	1618.2		7904.9	1233.5	1171.2	1295.8		7051.9	459.94	229	690.88		8231.9	1180.9	1053.5	1308.2
7094.3	803.78	543.6	1064		6450.5	588.89	433.27	744.51		6052.7	2095.4	2040.8	2149.9		7939.8	2507.5	2288.8	2726.2		8975.8	1461.3	1295.8	1626.8		7944.2	1240	1177.9	1302.1		7080.6	457.75	227.56	687.94		8264.3	1177.3	1048.4	1306.2
7128.4	803.17	537.32	1069		6481.2	588.39	434.25	742.54		6082.3	2090.6	2036.1	2145.1		7972.7	2510.4	2293.1	2727.6		9015.6	1467.3	1299.4	1635.1		7983.5	1246.1	1184.3	1307.9		7109.2	455.54	226.11	684.97		8296.7	1173.6	1043	1304.1
7162.5	802.51	530.95	1074.1		6511.8	587.96	435.32	740.59		6111.9	2086	2031.4	2140.5		8005.6	2512.8	2297.2	2728.5		9055.3	1472.9	1302.7	1643		8022.8	1251.7	1190.1	1313.3		7137.8	453.33	224.67	681.98		8329.1	1169.7	1037.5	1302
7196.5	801.8	524.5	1079.1		6542.4	587.59	436.51	738.67		6141.5	2081.5	2026.9	2136		8038.5	2514.9	2300.9	2728.8		9095.1	1478	1305.5	1650.5		8062.1	1256.7	1195.4	1318		7166.4	451.1	223.24	678.96		8361.5	1165.7	1031.7	1299.7
7230.6	801.04	517.98	1084.1		6573	587.28	437.79	736.78		6171	2077.1	2022.5	2131.8		8071.4	2516.4	2304.4	2728.5		9134.8	1482.7	1307.9	1657.5		8101.4	1261.2	1200.2	1322.3		7195	448.86	221.81	675.91		8393.9	1161.6	1025.7	1297.4
7264.7	800.23	511.41	1089.1		6603.6	587.04	439.17	734.92		6200.6	2072.9	2018.2	2127.7		8104.3	2517.5	2307.5	2727.5		9174.6	1486.9	1309.9	1663.9		8140.6	1265.2	1204.4	1326		7223.6	446.62	220.38	672.85		8426.3	1157.3	1019.6	1295
7298.7	799.38	504.8	1094		6634.2	586.87	440.64	733.11		6230.2	2068.9	2014.1	2123.8		8137.2	2518.1	2310.2	2725.9		9214.3	1490.5	1311.5	1669.6		8179.9	1268.7	1208.2	1329.2		7252.3	444.36	218.97	669.76		8458.7	1152.9	1013.3	1292.5
7332.8	798.49	498.17	1098.8		6664.8	586.77	442.21	731.34		6259.8	2065.1	2010.1	2120.1		8170.1	2518	2312.5	2723.6		9254.1	1493.5	1312.6	1674.5		8219.2	1271.6	1211.4	1331.9		7280.9	442.11	217.56	666.66		8491.1	1148.4	1006.8	1289.9
7366.9	797.56	491.54	1103.6		6695.4	586.74	443.87	729.62		6289.4	2061.5	2006.3	2116.7		8203	2517.4	2314.3	2720.6		9293.8	1495.9	1313.3	1678.6		8258.5	1274.1	1214.2	1334		7309.5	439.84	216.16	663.53		8523.6	1143.7	1000.2	1287.3
7401	796.59	484.91	1108.3		6726.1	586.79	445.62	727.96		6319	2058.1	2002.6	2113.6		8235.9	2516.2	2315.7	2716.8		9333.6	1497.8	1313.7	1681.8		8297.8	1276.1	1216.4	1335.8		7338.1	437.58	214.77	660.39		8556	1139	993.4	1284.6
7435	795.58	478.31	1112.8		6756.7	586.91	447.45	726.37		6348.6	2054.9	1999.2	2110.7		8268.8	2514.4	2316.5	2712.2		9373.3	1499.1	1313.8	1684.3		8337.1	1277.6	1218.2	1337		7366.7	435.31	213.39	657.24		8588.4	1134.2	986.51	1281.8
7469.1	794.54	471.75	1117.3		6787.3	587.11	449.37	724.85		6378.1	2052	1995.9	2108.1		8301.7	2511.9	2316.9	2707		9413.1	1499.9	1313.8	1686		8376.3	1278.7	1219.5	1337.9		7395.3	433.04	212.02	654.07		8620.8	1129.2	979.49	1279
7503.2	793.46	465.25	1121.7		6817.9	587.39	451.37	723.4		6407.7	2049.3	1992.9	2105.8		8334.6	2508.9	2316.8	2701		9452.8	1500.3	1313.6	1687		8415.6	1279.3	1220.3	1338.2		7424	430.77	210.66	650.89		8653.2	1124.2	972.36	1276
7537.2	792.36	458.81	1125.9		6848.5	587.74	453.46	722.02		6437.3	2046.9	1990	2103.9		8367.6	2505.3	2316.1	2694.4		9492.6	1500.3	1313.2	1687.3		8454.9	1279.5	1220.7	1338.2		7452.6	428.51	209.32	647.69		8685.6	1119.1	965.13	1273.1
7571.3	791.22	452.45	1130		6879.1	588.17	455.62	720.73		6466.9	2044.8	1987.4	2102.2		8400.5	2501	2315	2687.1		9532.3	1499.9	1312.8	1687		8494.2	1279.2	1220.6	1337.8		7481.2	426.24	207.99	644.49		8718	1113.9	957.81	1270
7605.4	790.06	446.19	1133.9		6909.7	588.68	457.85	719.5		6496.5	2042.9	1985	2100.9		8433.4	2496.2	2313.3	2679.2		9572	1499.2	1312.2	1686.1		8533.5	1278.5	1220.1	1337		7509.8	423.98	206.68	641.28		8750.4	1108.6	950.42	1266.9
7639.5	788.88	440.03	1137.7		6940.3	589.26	460.16	718.36		6526.1	2041.3	1982.8	2099.8		8466.3	2490.9	2311.2	2670.6		9611.8	1498.1	1311.5	1684.6		8572.8	1277.5	1219.2	1335.8		7538.4	421.73	205.39	638.07		8782.8	1103.3	942.95	1263.7
7673.5	787.68	434	1141.3		6970.9	589.91	462.54	717.28		6555.7	2039.8	1980.7	2099		8499.2	2485	2308.5	2661.4		9651.5	1496.6	1310.7	1682.6		8612	1276	1217.8	1334.2		7567	419.48	204.12	634.84		8815.2	1097.9	935.43	1260.4
7707.6	786.45	428.11	1144.8		7001.6	590.63	464.99	716.28		6585.2	2038.6	1978.8	2098.4		8532.1	2478.5	2305.3	2651.7		9691.3	1494.9	1309.8	1680		8651.3	1274.2	1216	1332.3		7595.7	417.24	202.86	631.62		8847.6	1092.4	927.85	1257
7741.7	785.21	422.36	1148.1		7032.2	591.42	467.5	715.34		6614.8	2037.5	1977.1	2098		8565	2471.5	2301.6	2641.4		9731	1492.9	1308.7	1677		8690.6	1271.9	1213.8	1330.1		7624.3	415.01	201.62	628.39		8880	1086.9	920.2	1253.6
7775.7	783.95	416.77	1151.1		7062.8	592.28	470.08	714.48		6644.4	2036.6	1975.4	2097.8		8597.9	2464	2297.3	2630.6		9770.8	1490.5	1307.6	1673.5		8729.9	1269.4	1211.2	1327.5		7652.9	412.79	200.41	625.16		8912.4	1081.2	912.5	1250
7809.8	782.68	411.36	1154		7093.4	593.2	472.72	713.69		6674	2035.8	1973.8	2097.7		8630.8	2455.9	2292.6	2619.2		9810.5	1487.9	1306.4	1669.5		8769.2	1266.4	1208.2	1324.7		7681.5	410.58	199.22	621.94		8944.9	1075.5	904.72	1246.3
7843.9	781.39	406.13	1156.7		7124	594.19	475.41	712.97		6703.6	2035.1	1972.4	2097.8		8663.7	2447.3	2287.2	2607.4		9850.3	1485.1	1305	1665.1		8808.5	1263.2	1204.9	1321.5		7710.1	408.38	198.05	618.71		8977.3	1069.6	896.86	1242.4
7877.9	780.1	401.1	1159.1		7154.6	595.24	478.17	712.32		6733.2	2034.5	1971	2098		8696.6	2438.2	2281.4	2595.1		9890	1482	1303.6	1660.4		8847.7	1259.6	1201.1	1318		7738.7	406.2	196.91	615.48		9009.7	1063.6	888.92	1238.3
7912	778.8	396.28	1161.3		7185.2	596.35	480.98	711.73		6762.8	2034	1969.6	2098.3		8729.5	2428.7	2275	2582.3		9929.8	1478.7	1302.1	1655.2		8887	1255.7	1197.1	1314.2		7767.4	404.03	195.79	612.26		9042.1	1057.5	880.91	1234.1
7946.1	777.49	391.67	1163.3		7215.8	597.52	483.83	711.21		6792.4	2033.5	1968.3	2098.7		8762.4	2418.6	2268.1	2569.2		9969.5	1475.2	1300.5	1649.8		8926.3	1251.5	1192.7	1310.2		7796	401.88	194.7	609.05		9074.5	1051.3	872.83	1229.7
7980.2	776.18	387.3	1165.1		7246.4	598.75	486.74	710.76		6821.9	2033.1	1967.1	2099.1		8795.3	2408.1	2260.7	2555.6		10009	1471.4	1298.9	1644		8965.6	1246.9	1188	1305.9		7824.6	399.74	193.64	605.84		9106.9	1044.9	864.69	1225.2
8014.2	774.87	383.16	1166.6		7277.1	600.03	489.69	710.38		6851.5	2032.7	1965.8	2099.5		8828.2	2397.2	2252.8	2541.7		10049	1467.5	1297.2	1637.9		9004.9	1242.2	1182.9	1301.4		7853.2	397.63	192.61	602.64		9139.3	1038.5	856.51	1220.4
8048.3	773.56	379.26	1167.9		7307.7	601.37	492.69	710.06		6881.1	2032.3	1964.6	2100		8861.1	2385.9	2244.4	2527.5		10089	1463.5	1295.4	1631.6		9044.2	1237.1	1177.6	1296.6		7881.8	395.53	191.61	599.45		9171.7	1031.9	848.28	1215.6
8082.4	772.27	375.61	1168.9		7338.3	602.76	495.73	709.8		6910.7	2032	1963.5	2100.6		8894	2374.3	2235.6	2512.9		10128	1459.3	1293.6	1624.9		9083.4	1231.7	1171.9	1291.5		7910.4	393.46	190.64	596.27		9204.1	1025.3	840.03	1210.6
8116.4	770.99	372.2	1169.8		7368.9	604.21	498.8	709.61		6940.3	2031.7	1962.4	2101.1		8926.9	2362.2	2226.3	2498.2		10168	1455	1291.8	1618.1		9122.7	1225.9	1165.8	1286		7939.1	391.41	189.71	593.1		9236.5	1018.6	831.76	1205.4
8150.5	769.73	369.04	1170.4		7399.5	605.7	501.92	709.48		6969.9	2031.5	1961.3	2101.7		8959.8	2349.9	2216.7	2483.1		10208	1450.5	1290	1611		9162	1219.8	1159.4	1280.3		7967.7	389.38	188.81	589.95		9268.9	1011.8	823.47	1200.1
8184.6	768.49	366.15	1170.8		7430.1	607.24	505.06	709.42		6999.5	2031.2	1960.2	2102.2		8992.7	2337.3	2206.7	2467.9		10248	1446	1288.2	1603.8		9201.3	1213.4	1152.6	1274.2		7996.3	387.38	187.94	586.81		9301.3	1004.9	815.19	1194.7
8218.6	767.28	363.52	1171		7460.7	608.83	508.23	709.42		7029	2030.9	1959.2	2102.7		9025.7	2324.4	2196.3	2452.5		10287	1441.3	1286.3	1596.3		9240.6	1206.6	1145.4	1267.7		8024.9	385.4	187.11	583.68		9333.7	998.04	806.92	1189.2
8252.7	766.11	361.17	1171.1		7491.3	610.46	511.43	709.48		7058.6	2030.7	1958.1	2103.2		9058.6	2311.3	2185.5	2437		10327	1436.6	1284.5	1588.7		9279.9	1199.4	1137.9	1261		8053.5	383.45	186.33	580.57		9366.1	991.08	798.67	1183.5
8286.8	764.98	359.1	1170.9		7522	612.13	514.66	709.6		7088.2	2030.4	1957.1	2103.7		9091.5	2297.9	2174.5	2421.3		10367	1431.9	1282.8	1580.9		9319.1	1192.1	1130.1	1254		8082.1	381.53	185.58	577.48		9398.6	984.08	790.45	1177.7
8320.9	763.89	357.32	1170.4		7552.6	613.85	517.91	709.79		7117.8	2030.1	1956.1	2104.1		9124.4	2284.3	2163.1	2405.5		10407	1427	1281	1573		9358.4	1184.4	1122.1	1246.7		8110.8	379.64	184.87	574.41		9431	977.04	782.29	1171.8
8354.9	762.84	355.85	1169.8		7583.2	615.6	521.18	710.03		7147.4	2029.8	1955.1	2104.4		9157.3	2270.5	2151.5	2389.6		10446	1422.2	1279.3	1565		9397.7	1176.5	1113.9	1239.2		8139.4	377.78	184.2	571.36		9463.4	969.97	774.18	1165.8
8389	761.85	354.68	1169		7613.8	617.4	524.46	710.34		7177	2029.4	1954.1	2104.7		9190.2	2256.6	2139.6	2373.5		10486	1417.3	1277.7	1557		9437	1168.5	1105.4	1231.5		8168	375.95	183.58	568.32		9495.8	962.88	766.15	1159.6
8423.1	760.92	353.84	1168		7644.4	619.23	527.76	710.7		7206.6	2029	1953.2	2104.9		9223.1	2242.4	2127.4	2357.4		10526	1412.5	1276.1	1548.9		9476.3	1160.2	1096.8	1223.6		8196.6	374.16	183	565.31		9528.2	955.78	758.21	1153.4
8457.1	760.05	353.32	1166.8		7675	621.1	531.07	711.13		7236.1	2028.6	1952.2	2105		9256	2228.1	2115	2341.2		10566	1407.7	1274.6	1540.8		9515.6	1151.8	1088.1	1215.5		8225.2	372.4	182.47	562.33		9560.6	948.67	750.36	1147
8491.2	759.25	353.15	1165.3		7705.6	623	534.39	711.61		7265.7	2028.1	1951.3	2105		9288.9	2213.6	2102.4	2324.8		10605	1402.9	1273.2	1532.6		9554.8	1143.3	1079.3	1207.3		8253.8	370.67	181.98	559.37		9593	941.57	742.63	1140.5
8525.3	758.51	353.34	1163.7		7736.2	624.93	537.72	712.15		7295.3	2027.6	1950.3	2105		9321.8	2199	2089.6	2308.4		10645	1398.2	1271.8	1524.6		9594.1	1134.6	1070.4	1198.9		8282.5	368.99	181.55	556.43		9625.4	934.47	735.03	1133.9
8559.4	757.86	353.89	1161.8		7766.8	626.9	541.04	712.75		7324.9	2027.1	1949.4	2104.8		9354.7	2184.3	2076.6	2291.9		10685	1393.6	1270.6	1516.6		9633.4	1125.9	1061.4	1190.5		8311.1	367.34	181.16	553.52		9657.8	927.38	727.56	1127.2
8593.4	757.29	354.82	1159.7		7797.5	628.89	544.37	713.41		7354.5	2026.6	1948.5	2104.6		9387.6	2169.4	2063.5	2275.4		10725	1389.1	1269.5	1508.7		9672.7	1117.2	1052.5	1181.9		8339.7	365.73	180.83	550.64		9690.2	920.32	720.23	1120.4
8627.5	756.8	356.13	1157.5		7828.1	630.91	547.7	714.12		7384.1	2026	1947.7	2104.3		9420.5	2154.5	2050.3	2258.8		10764	1384.9	1268.7	1501.1		9712	1108.5	1043.6	1173.3		8368.3	364.17	180.55	547.78		9722.6	913.27	713.04	1113.5
8661.6	756.4	357.82	1155		7858.7	632.96	551.03	714.89		7413.7	2025.3	1946.8	2103.9		9453.4	2139.6	2036.9	2242.2		10804	1381	1268.1	1493.9		9751.3	1099.7	1034.8	1164.6		8396.9	362.64	180.32	544.96		9755	906.25	705.99	1106.5
8695.6	756.1	359.88	1152.3		7889.3	635.03	554.35	715.71		7443.3	2024.7	1946	2103.4		9486.3	2124.6	2023.5	2225.6		10844	1377.4	1267.8	1486.9		9790.5	1091	1026	1155.9		8425.5	361.16	180.15	542.17		9787.4	899.26	699.08	1099.4
8729.7	755.91	362.3	1149.5		7919.9	637.12	557.66	716.59		7472.8	2024	1945.1	2102.9		9519.2	2109.6	2010.1	2209.1		10884	1374.2	1267.8	1480.5		9829.8	1082.3	1017.3	1147.2		8454.2	359.72	180.04	539.41		9819.9	892.3	692.3	1092.3
8763.8	755.82	365.09	1146.5		7950.5	639.24	560.95	717.52		7502.4	2023.3	1944.3	2102.3		9552.1	2094.7	1996.6	2192.7		10923	1371.4	1268.2	1474.5		9869.1	1073.6	1008.7	1138.5		8482.8	358.33	179.99	536.68		9852.3	885.38	685.66	1085.1
8797.8	755.84	368.24	1143.4		7981.1	641.37	564.24	718.5		7532	2022.6	1943.5	2101.7		9585	2079.7	1983.2	2176.3		10963	1369	1268.9	1469		9908.4	1065	1000.2	1129.9		8511.4	356.99	179.99	533.98		9884.7	878.49	679.16	1077.8
8831.9	755.98	371.75	1140.2		8011.7	643.52	567.51	719.54		7561.6	2021.9	1942.8	2101		9617.9	2064.9	1969.8	2160		11003	1367	1270	1464		9947.7	1056.5	991.76	1121.2		8540	355.69	180.06	531.32		9917.1	871.64	672.81	1070.5
8866	756.25	375.6	1136.9		8042.3	645.69	570.76	720.62		7591.2	2021.1	1942	2100.3		9650.8	2050.1	1956.4	2143.8		11043	1365.5	1271.5	1459.6		9987	1048.1	983.48	1112.7		8568.6	354.45	180.2	528.7		9949.5	864.84	666.59	1063.1
8900.1	756.64	379.81	1133.5		8073	647.87	573.99	721.75		7620.8	2020.4	1941.2	2099.5		9683.8	2035.4	1943.1	2127.8		11082	1364.4	1273.2	1455.7		10026	1039.7	975.33	1104.1		8597.2	353.25	180.39	526.11		9981.9	858.09	660.53	1055.6
8934.1	757.17	384.35	1130		8103.6	650.07	577.21	722.93		7650.4	2019.6	1940.5	2098.8		9716.7	2020.9	1929.8	2111.9		11122	1363.8	1275.3	1452.3		10066	1031.5	967.32	1095.7		8625.9	352.11	180.66	523.56		10014	851.38	654.61	1048.2
8968.2	757.83	389.23	1126.4		8134.2	652.28	580.39	724.16		7679.9	2018.9	1939.7	2098		9749.6	2006.4	1916.6	2096.2		11162	1363.6	1277.7	1449.5		10105	1023.4	959.47	1087.4		8654.5	351.02	180.99	521.05		10047	844.73	648.84	1040.6
9002.3	758.64	394.43	1122.8		8164.8	654.5	583.56	725.43		7709.5	2018.1	1939	2097.2		9782.5	1992	1903.5	2080.6		11202	1363.9	1280.5	1447.2		10144	1015.5	951.78	1079.2		8683.1	349.98	181.39	518.58		10079	838.14	643.22	1033.1
9036.3	759.6	399.96	1119.2		8195.4	656.72	586.69	726.75		7739.1	2017.3	1938.3	2096.3		9815.4	1977.8	1890.5	2065.1		11241	1364.6	1283.6	1445.6		10183	1007.7	944.28	1071.1		8711.7	349	181.86	516.15		10112	831.61	637.77	1025.5
9070.4	760.71	405.81	1115.6		8226	658.95	589.8	728.11		7768.7	2016.5	1937.6	2095.5		9848.3	1963.7	1877.6	2049.8		11281	1365.8	1287	1444.5		10223	1000	936.95	1063.1		8740.3	348.08	182.41	513.76		10144	825.15	632.47	1017.8
9104.5	761.98	411.97	1112		8256.6	661.19	592.88	729.5		7798.3	2015.8	1936.9	2094.7		9881.2	1949.7	1864.9	2034.6		11321	1367.4	1290.7	1444.1		10262	992.59	929.82	1055.4		8768.9	347.22	183.02	511.41		10176	818.75	627.34	1010.1
9138.5	763.42	418.43	1108.4		8287.2	663.43	595.93	730.94		7827.9	2015	1936.2	2093.8		9914.1	1935.9	1852.3	2019.6		11361	1369.5	1294.7	1444.3		10301	985.29	922.88	1047.7		8797.6	346.41	183.71	509.11		10209	812.42	622.39	1002.4
9172.6	765.02	425.19	1104.9		8317.9	665.68	598.94	732.41		7857.5	2014.3	1935.6	2093		9947	1922.3	1839.8	2004.7		11400	1372	1299	1445.1		10341	978.14	916.09	1040.2		8826.2	345.67	184.48	506.85		10241	806.16	617.61	994.71
9206.7	766.81	432.24	1101.4		8348.5	667.92	601.92	733.92		7887	2013.6	1934.9	2092.2		9979.9	1908.7	1827.5	1990		11440	1375	1303.5	1446.4		10380	971.1	909.42	1032.8		8854.8	344.98	185.33	504.64		10274	799.99	613.02	986.95
9240.8	768.77	439.57	1098		8379.1	670.16	604.87	735.45		7916.6	2012.8	1934.3	2091.4		10013	1895.4	1815.4	1975.4		11480	1378.3	1308.3	1448.4		10419	964.18	902.86	1025.5		8883.4	344.36	186.26	502.47		10306	793.89	608.62	979.16
9274.8	770.91	447.18	1094.7		8409.7	672.4	607.78	737.02		7946.2	2012.2	1933.7	2090.6		10046	1882.2	1803.4	1961.1		11520	1382.1	1313.2	1450.9		10458	957.37	896.42	1018.3		8912	343.81	187.26	500.35		10338	787.87	604.4	971.34
9308.9	773.25	455.06	1091.4		8440.3	674.64	610.66	738.62		7975.8	2011.5	1933.2	2089.8		10079	1869.3	1791.7	1946.9		11559	1386.2	1318.4	1453.9		10498	950.68	890.1	1011.3		8940.6	343.32	188.35	498.28		10371	781.94	600.37	963.51
9343	775.79	463.19	1088.4		8470.9	676.87	613.49	740.24		8005.4	2010.8	1932.7	2089		10112	1856.6	1780.2	1933		11599	1390.6	1323.7	1457.5		10537	944.13	883.91	1004.3		8969.3	342.89	189.53	496.26		10403	776.09	596.53	955.66
9377	778.52	471.58	1085.5		8501.5	679.09	616.29	741.88		8035	2010.2	1932.2	2088.3		10144	1844.2	1769	1919.4		11639	1395.3	1329.1	1461.5		10576	937.71	877.86	997.57		8997.9	342.54	190.79	494.29		10436	770.33	592.86	947.81
9411.1	781.46	480.22	1082.7		8532.1	681.3	619.06	743.54		8064.6	2009.6	1931.7	2087.5		10177	1832	1758	1906.1		11679	1400.2	1334.5	1465.9		10615	931.45	871.95	990.95		9026.5	342.25	192.13	492.38		10468	764.66	589.37	939.96
9445.2	784.62	489.09	1080.1		8562.7	683.5	621.78	745.22		8094.1	2009.1	1931.3	2086.8		10210	1820.3	1747.4	1893.1		11718	1405.3	1339.8	1470.7		10655	925.34	866.19	984.49		9055.1	342.04	193.56	490.51		10500	759.08	586.05	932.11
9479.2	787.99	498.19	1077.8		8593.4	685.69	624.47	746.92		8123.7	2008.5	1930.9	2086.1		10243	1808.8	1737.1	1880.5		11758	1410.4	1345.1	1475.7		10694	919.39	860.6	978.19		9083.7	341.89	195.08	488.7		10533	753.59	582.91	924.26
9513.3	791.58	507.51	1075.6		8624	687.87	627.11	748.62		8153.3	2008	1930.5	2085.4		10276	1797.8	1727.2	1868.3		11798	1415.6	1350.3	1481		10733	913.62	855.18	972.05		9112.3	341.82	196.69	486.95		10565	748.19	579.93	916.44
9547.4	795.4	517.04	1073.8		8654.6	690.03	629.71	750.34		8182.9	2007.4	1930.1	2084.8		10309	1787.1	1717.7	1856.5		11838	1420.8	1355.3	1486.4		10773	908.02	849.96	966.09		9141	341.83	198.4	485.25		10598	742.88	577.13	908.63
9581.5	799.45	526.76	1072.1		8685.2	692.16	632.27	752.05		8212.5	2006.9	1929.8	2084		10342	1776.9	1708.6	1845.1		11877	1426.1	1360.1	1492		10812	902.61	844.93	960.29		9169.6	341.9	200.19	483.61		10630	737.67	574.48	900.85
9615.5	803.74	536.69	1070.8		8715.8	694.27	634.78	753.76		8242.1	2006.4	1929.4	2083.3		10375	1767.1	1699.9	1834.3		11917	1431.2	1364.7	1497.8		10851	897.4	840.12	954.67		9198.2	342.06	202.08	482.04		10662	732.55	572	893.11
9649.6	808.27	546.79	1069.8		8746.4	696.34	637.23	755.45		8271.7	2005.8	1929	2082.5		10408	1757.8	1691.7	1823.9		11957	1436.4	1369.2	1503.6		10890	892.38	835.54	949.23		9226.8	342.29	204.07	480.52		10695	727.55	569.68	885.41
9683.7	813.05	557.07	1069		8777	698.38	639.63	757.12		8301.3	2005.2	1928.7	2081.7		10441	1749	1684	1814		11997	1441.6	1373.6	1509.5		10930	887.58	831.2	943.96		9255.4	342.6	206.14	479.06		10727	722.65	567.52	877.78
9717.7	818.09	567.51	1068.7		8807.6	700.37	641.97	758.77		8330.8	2004.6	1928.3	2080.8		10473	1740.7	1676.7	1804.6		12036	1446.6	1377.7	1515.5		10969	882.99	827.12	938.86		9284	342.99	208.32	477.67		10760	717.87	565.51	870.23
9751.8	823.38	578.1	1068.7		8838.3	702.32	644.25	760.39		8360.4	2003.9	1928	2079.9		10506	1732.9	1669.9	1795.8		12076	1451.7	1381.8	1521.6		11008	878.63	823.33	933.94		9312.7	343.47	210.59	476.35		10792	713.21	563.66	862.77
9785.9	828.94	588.84	1069		8868.9	704.21	646.46	761.97		8390	2003.2	1927.5	2078.9		10539	1725.6	1663.7	1787.5		12116	1456.7	1385.7	1527.7		11048	874.51	819.82	929.19		9341.3	344.02	212.95	475.09		10824	708.69	561.96	855.42
9820	834.76	599.71	1069.8		8899.5	706.05	648.6	763.5		8419.6	2002.5	1927.1	2077.9		10572	1718.8	1658	1779.7		12156	1461.6	1389.4	1533.8		11087	870.62	816.62	924.62		9369.9	344.65	215.4	473.91		10857	704.3	560.4	848.19
9854	840.86	610.71	1071		8930.1	707.83	650.67	764.98		8449.2	2001.7	1926.6	2076.7		10605	1712.6	1652.7	1772.5		12195	1466.5	1393	1539.9		11126	866.98	813.75	920.22		9398.5	345.37	217.93	472.81		10889	700.05	558.99	841.11
9888.1	847.24	621.83	1072.7		8960.7	709.54	652.66	766.41		8478.8	2000.7	1926	2075.5		10638	1706.9	1648	1765.8		12235	1471.2	1396.5	1546		11165	863.6	811.21	915.99		9427.1	346.17	220.56	471.79		10922	695.94	557.71	834.17
9922.2	853.91	633.05	1074.8		8991.3	711.18	654.57	767.78		8508.4	1999.7	1925.3	2074.2		10671	1701.7	1643.8	1759.6		12275	1475.9	1399.8	1551.9		11205	860.5	809.03	911.97		9455.7	347.05	223.27	470.84		10954	692	556.58	827.41
9956.2	860.86	644.37	1077.4		9021.9	712.74	656.39	769.09		8537.9	1998.6	1924.5	2072.7		10704	1697	1640.1	1753.9		12315	1480.3	1402.8	1557.8		11244	857.67	807.19	908.15		9484.4	348.02	226.06	469.98		10987	688.21	555.58	820.83
9990.3	868.11	655.78	1080.4		9052.5	714.21	658.11	770.31		8567.5	1997.3	1923.5	2071.1		10737	1692.8	1636.7	1748.8		12354	1484.6	1405.7	1563.5		11283	855.12	805.69	904.56		9513	349.07	228.93	469.21		11019	684.58	554.71	814.46
10024	875.65	667.28	1084		9083.1	715.59	659.73	771.44		8597.1	1995.9	1922.4	2069.4		10770	1689	1633.8	1744.1		12394	1488.6	1408.2	1569		11323	852.86	804.52	901.21		9541.6	350.21	231.89	468.53		11051	681.13	553.96	808.29
10058	883.49	678.86	1088.1		9113.8	716.86	661.24	772.47		8626.7	1994.4	1921.2	2067.6		10803	1685.6	1631.3	1739.9		12434	1492.4	1410.5	1574.3		11362	850.89	803.67	898.11		9570.2	351.43	234.92	467.94		11084	677.85	553.35	802.36
10093	891.62	690.5	1092.7		9144.4	718.01	662.62	773.39		8656.3	1992.7	1919.8	2065.7		10835	1682.6	1629.1	1736.2		12474	1495.9	1412.4	1579.3		11401	849.23	803.16	895.31		9598.8	352.74	238.03	467.45		11116	674.76	552.85	796.67
10127	900.04	702.22	1097.9		9175	719.03	663.87	774.18		8685.9	1991	1918.3	2063.6		10868	1680.1	1627.3	1732.8		12513	1499	1414	1584		11440	847.93	803.01	892.85		9627.4	354.14	241.22	467.06		11149	671.86	552.48	791.24
10161	908.74	714	1103.5		9205.6	719.91	664.99	774.84		8715.5	1989.1	1916.7	2061.5		10901	1677.8	1625.7	1729.9		12553	1501.8	1415.3	1588.4		11480	847	803.23	890.77		9656.1	355.62	244.48	466.76		11181	669.15	552.23	786.07
10195	917.73	725.85	1109.6		9236.2	720.65	665.95	775.35		8745	1987.1	1914.9	2059.3		10934	1676	1624.5	1727.4		12593	1504.2	1416.1	1592.3		11519	846.46	803.83	889.09		9684.7	357.19	247.81	466.57		11213	666.65	552.1	781.19
10229	926.99	737.75	1116.2		9266.8	721.23	666.76	775.7		8774.6	1985	1913.1	2057		10967	1674.5	1623.6	1725.4		12633	1506.1	1416.5	1595.7		11558	846.33	804.82	887.85		9713.3	358.85	251.22	466.49		11246	664.35	552.09	776.61
10263	936.53	749.72	1123.3		9297.4	721.64	667.41	775.88		8804.2	1982.9	1911.2	2054.6		11000	1673.3	1622.9	1723.7		12672	1507.7	1416.6	1598.7		11598	846.63	806.2	887.06		9741.9	360.6	254.69	466.51		11278	662.28	552.21	772.34
10297	946.35	761.75	1130.9		9328	721.87	667.88	775.87		8833.8	1980.7	1909.2	2052.2		11033	1672.5	1622.5	1722.4		12712	1508.8	1416.3	1601.2		11637	847.36	807.97	886.75		9770.5	362.44	258.24	466.65		11311	660.43	552.48	768.39
10331	956.43	773.85	1139		9358.6	721.92	668.17	775.67		8863.4	1978.4	1907.1	2049.8		11066	1672	1622.4	1721.5		12752	1509.5	1415.7	1603.3		11676	848.54	810.15	886.93		9799.1	364.37	261.85	466.89		11343	658.83	552.88	764.78
10365	966.79	786.01	1147.6		9389.3	721.77	668.26	775.27		8893	1976.1	1905	2047.3		11099	1671.8	1622.6	1720.9		12792	1509.8	1414.8	1604.8		11715	850.17	812.73	887.61		9827.8	366.39	265.53	467.25		11375	657.49	553.45	761.52
10399	977.41	798.26	1156.6		9419.9	721.41	668.17	774.65		8922.6	1973.8	1902.8	2044.8		11132	1671.9	1623.1	1720.8		12831	1509.7	1413.6	1605.8		11755	852.26	815.72	888.79		9856.4	368.5	269.28	467.73		11408	656.4	554.18	758.62
10433	988.28	810.58	1166		9450.5	720.83	667.86	773.81		8952.2	1971.5	1900.6	2042.3		11164	1672.4	1623.8	1720.9		12871	1509.2	1412.1	1606.3		11794	854.77	819.09	890.45		9885	370.71	273.09	468.32		11440	655.59	555.08	756.1
10467	999.4	822.98	1175.8		9481.1	720.04	667.35	772.74		8981.7	1969.1	1898.5	2039.7		11197	1673.1	1624.7	1721.5		12911	1508.4	1410.4	1606.3		11833	857.69	822.81	892.57		9913.6	373	276.97	469.04		11473	655.05	556.14	753.96
10501	1010.7	835.46	1186		9511.7	719.05	666.65	771.45		9011.3	1966.7	1896.3	2037.2		11230	1674.1	1625.9	1722.4		12951	1507.1	1408.5	1605.8		11873	860.97	826.83	895.1		9942.2	375.39	280.92	469.87		11505	654.78	557.36	752.2
10535	1022.3	848.03	1196.5		9542.3	717.85	665.76	769.95		9040.9	1964.4	1894.2	2034.7		11263	1675.5	1627.4	1723.6		12990	1505.5	1406.4	1604.7		11912	864.55	831.09	898		9970.8	377.88	284.92	470.83		11537	654.8	558.74	750.86
10569	1034	860.7	1207.4		9572.9	716.46	664.68	768.24		9070.5	1962.1	1892.1	2032.1		11296	1677.1	1629.1	1725.1		13030	1503.6	1404.2	1603		11951	868.38	835.54	901.22		9999.5	380.46	289	471.91		11570	655.1	560.27	749.92
10604	1046	873.47	1218.4		9603.5	714.89	663.44	766.35		9100.1	1959.8	1890	2029.6		11329	1679.1	1631.1	1727		13070	1501.4	1401.8	1600.9		11990	872.41	840.11	904.72		10028	383.13	293.14	473.12		11602	655.68	561.95	749.41
10638	1058	886.36	1229.7		9634.2	713.14	662.02	764.26		9129.7	1957.5	1888	2027.1		11362	1681.3	1633.4	1729.3		13110	1498.8	1399.3	1598.3		12030	876.62	844.76	908.48		10057	385.9	297.35	474.46		11635	656.55	563.78	749.33
10672	1070.3	899.36	1241.2		9664.8	711.22	660.45	762		9159.3	1955.3	1886	2024.6		11395	1684	1636	1731.9		13149	1495.8	1396.5	1595.2		12069	880.95	849.44	912.46		10085	388.77	301.62	475.92		11667	657.72	565.74	749.7
10706	1082.6	912.5	1252.8		9695.4	709.14	658.73	759.56		9188.8	1953.1	1884.1	2022.1		11428	1686.9	1638.9	1734.9		13189	1492.6	1393.5	1591.6		12108	885.38	854.12	916.63		10114	391.73	305.95	477.5		11699	659.18	567.85	750.52
10740	1095.1	925.77	1264.5		9726	706.91	656.86	756.96		9218.4	1951	1882.3	2019.7		11461	1690.2	1642.2	1738.2		13229	1489	1390.4	1587.6		12148	889.86	858.76	920.96		10143	394.79	310.36	479.22		11732	660.94	570.09	751.8
10774	1107.7	939.18	1276.3		9756.6	704.53	654.86	754.2		9248	1948.9	1880.6	2017.2		11494	1693.8	1645.8	1741.9		13268	1485	1387	1583		12187	894.37	863.32	925.42		10171	397.95	314.83	481.06		11764	663	572.46	753.54
10808	1120.4	952.71	1288.1		9787.2	702.01	652.72	751.29		9277.6	1946.9	1879	2014.8		11526	1697.9	1649.7	1746		13308	1480.7	1383.4	1578.1		12226	898.86	867.75	929.96		10200	401.2	319.37	483.04		11797	665.36	574.96	755.76
10842	1133.1	966.33	1299.9		9817.8	699.36	650.47	748.25		9307.2	1944.9	1877.5	2012.3		11559	1702.3	1654	1750.5		13348	1476.2	1379.6	1572.7		12265	903.29	872.04	934.54		10228	404.56	323.98	485.14		11829	668.01	577.57	758.45
10876	1145.9	980.03	1311.7		9848.4	696.58	648.1	745.07		9336.8	1943	1876	2009.9		11592	1707	1658.7	1755.4		13388	1471.4	1375.7	1567		12305	907.6	876.12	939.08		10257	408.02	328.67	487.37		11862	670.94	580.28	761.59
10910	1158.6	993.78	1323.5		9879	693.69	645.63	741.76		9366.4	1941.1	1874.7	2007.5		11625	1712.2	1663.7	1760.8		13427	1466.4	1371.8	1561.1		12344	911.75	879.97	943.54		10286	411.57	333.42	489.72		11894	674.13	583.09	765.18
10944	1171.4	1007.6	1335.2		9909.7	690.69	643.04	738.33		9395.9	1939.2	1873.4	2005.1		11658	1717.8	1669	1766.6		13467	1461.5	1367.9	1555		12383	915.72	883.57	947.87		10314	415.23	338.25	492.21		11926	677.58	585.97	769.19
10978	1184.1	1021.3	1346.8		9940.3	687.57	640.36	734.79		9425.5	1937.4	1872.2	2002.7		11691	1723.8	1674.7	1772.8		13507	1456.5	1364.1	1548.9		12423	919.48	886.91	952.04		10343	418.99	343.16	494.82		11959	681.28	588.93	773.62
11012	1196.7	1035.1	1358.3		9970.9	684.35	637.57	731.14		9455.1	1935.6	1871	2000.3		11724	1730.1	1680.8	1779.5		13547	1451.7	1360.5	1542.9		12462	922.98	889.96	956		10371	422.87	348.15	497.58		11991	685.2	591.95	778.45
11046	1209.2	1048.8	1369.6		10001	681.03	634.68	727.38		9484.7	1933.9	1869.9	1997.9		11757	1736.9	1687.1	1786.6		13586	1447.1	1357.1	1537		12501	926.21	892.73	959.7		10400	426.86	353.24	500.48		12024	689.36	595.04	783.67
11081	1221.6	1062.4	1380.8		10032	677.6	631.68	723.53		9514.3	1932.2	1868.9	1995.5		11790	1743.9	1693.7	1794.1		13626	1442.7	1354.1	1531.3		12540	929.16	895.2	963.13		10429	430.98	358.42	503.53		12056	693.72	598.19	789.25
11115	1233.9	1076	1391.8		10063	674.08	628.59	719.58		9543.9	1930.5	1867.8	1993.2		11823	1751.3	1700.6	1802		13666	1438.8	1351.5	1526		12580	931.81	897.36	966.25		10457	435.23	363.71	506.75		12088	698.27	601.38	795.17
11149	1246	1089.4	1402.6		10093	670.47	625.4	715.54		9573.5	1928.8	1866.8	1990.9		11855	1759	1707.7	1810.2		13706	1435.3	1349.4	1521.2		12619	934.13	899.22	969.03		10486	439.62	369.11	510.12		12121	703	604.61	801.39
11183	1257.9	1102.6	1413.2		10124	666.76	622.11	711.41		9603.1	1927.2	1865.8	1988.5		11888	1766.9	1715.1	1818.8		13745	1432.4	1347.8	1516.9		12658	936.1	900.76	971.45		10515	444.15	374.63	513.67		12153	707.88	607.87	807.89
11217	1269.6	1115.7	1423.5		10155	662.97	618.72	707.21		9632.6	1925.6	1864.9	1986.3		11921	1775.1	1722.6	1827.6		13785	1430	1346.8	1513.2		12698	937.78	902.03	973.53		10543	448.84	380.29	517.4		12186	712.89	611.16	814.63
11251	1281.1	1128.7	1433.5		10185	659.09	615.24	702.93		9662.2	1923.9	1863.9	1984		11954	1783.6	1730.3	1836.8		13825	1428.4	1346.5	1510.3		12737	939.22	903.12	975.32		10572	453.69	386.08	521.31		12218	718.02	614.45	821.59
11285	1292.3	1141.3	1443.2		10216	655.13	611.67	698.58		9691.8	1922.3	1862.9	1981.7		11987	1792.2	1738.3	1846.2		13865	1427.4	1346.7	1508		12776	940.47	904.07	976.86		10600	458.71	392	525.42		12250	723.24	617.76	828.72
11319	1303.2	1153.8	1452.5		10246	651.09	608.01	694.17		9721.4	1920.7	1861.9	1979.5		12020	1801	1746.3	1855.8		13904	1427.2	1347.7	1506.6		12815	941.59	904.98	978.2		10629	463.89	398.07	529.71		12283	728.54	621.07	836.01
11353	1313.8	1166	1461.6		10277	646.98	604.26	689.69		9751	1919	1860.8	1977.3		12053	1810	1754.5	1865.6		13944	1427.8	1349.4	1506.1		12855	942.63	905.88	979.38		10658	469.24	404.28	534.21		12315	733.89	624.37	843.42
11387	1324.1	1177.9	1470.2		10308	642.79	600.42	685.16		9780.6	1917.4	1859.7	1975.1		12086	1819.2	1762.8	1875.5		13984	1429.2	1351.9	1506.5		12894	943.58	906.77	980.4		10686	474.77	410.65	538.9		12348	739.29	627.67	850.92
11421	1334	1189.5	1478.6		10338	638.54	596.5	680.57		9810.2	1915.7	1858.6	1972.9		12119	1828.4	1771.2	1885.6		14024	1431.5	1355.1	1507.9		12933	944.45	907.64	981.26		10715	480.48	417.17	543.8		12380	744.73	630.97	858.49
11455	1343.7	1200.8	1486.5		10369	634.22	592.5	675.93		9839.7	1914.1	1857.4	1970.8		12152	1837.7	1779.7	1895.7		14063	1434.7	1359.1	1510.3		12972	945.24	908.49	981.99		10743	486.38	423.84	548.92		12412	750.19	634.27	866.11
11489	1353	1211.8	1494.1		10399	629.84	588.42	671.25		9869.3	1912.5	1856.3	1968.7		12185	1847	1788.2	1905.9		14103	1438.8	1363.9	1513.8		13012	945.94	909.31	982.57		10772	492.47	430.69	554.25		12445	755.67	637.59	873.75
11523	1361.9	1222.4	1501.3		10430	625.39	584.26	666.52		9898.9	1910.9	1855.1	1966.7		12217	1856.4	1796.7	1916.1		14143	1443.9	1369.5	1518.3		13051	946.55	910.09	983.02		10801	498.76	437.71	559.81		12477	761.16	640.92	881.4
11558	1370.4	1232.7	1508.2		10461	620.9	580.03	661.76		9928.5	1909.4	1854	1964.8		12250	1865.8	1805.2	1926.3		14183	1449.9	1375.9	1523.9		13090	947.07	910.81	983.33		10829	505.25	444.91	565.6		12510	766.64	644.27	889.02
11592	1378.6	1242.6	1514.6		10491	616.34	575.73	656.95		9958.1	1908	1852.9	1963		12283	1875.1	1813.7	1936.5		14222	1457	1383.2	1530.7		13130	947.47	911.45	983.49		10858	511.97	452.29	571.64		12542	772.12	647.64	896.59
11626	1386.3	1252.1	1520.6		10522	611.73	571.36	652.1		9987.7	1906.6	1851.8	1961.3		12316	1884.4	1822.2	1946.7		14262	1465.1	1391.4	1538.7		13169	947.75	912.02	983.49		10887	518.9	459.87	577.93		12574	777.57	651.04	904.1
11660	1393.7	1261.1	1526.2		10553	607.07	566.92	647.22		10017	1905.3	1850.9	1959.7		12349	1893.7	1830.7	1956.7		14302	1474.2	1400.5	1548		13208	947.91	912.49	983.34		10915	526.06	467.65	584.47		12607	782.99	654.47	911.52
11694	1400.6	1269.7	1531.4		10583	602.36	562.42	642.3		10047	1904.1	1850	1958.3		12382	1902.8	1839.1	1966.6		14342	1484.4	1410.5	1558.4		13247	947.97	912.89	983.06		10944	533.46	475.63	591.28		12639	788.38	657.93	918.82
11728	1407	1277.9	1536.2		10614	597.61	557.87	637.36		10076	1903.1	1849.2	1957		12415	1911.9	1847.4	1976.4		14381	1495.7	1421.4	1570		13287	947.95	913.23	982.67		10972	541.08	483.82	598.35		12672	793.71	661.42	926
11762	1413	1285.6	1540.5		10644	592.83	553.27	632.38		10106	1902.2	1848.6	1955.9		12448	1920.7	1855.6	1985.8		14421	1507.8	1433	1582.6		13326	947.87	913.54	982.2		11001	548.94	492.2	605.68		12704	798.98	664.95	933.02
11796	1418.6	1292.7	1544.4		10675	588.02	548.64	627.4		10136	1901.5	1848.1	1955		12481	1929.3	1863.6	1995		14461	1520.9	1445.4	1596.3		13365	947.77	913.84	981.69		11030	557.03	500.79	613.27		12737	804.19	668.52	939.86
11830	1423.6	1299.4	1547.9		10706	583.22	544.01	622.43		10165	1901	1847.8	1954.3		12514	1937.6	1871.4	2003.8		14501	1534.7	1458.5	1611		13405	947.66	914.16	981.16		11058	565.35	509.58	621.13		12769	809.32	672.13	946.51
11864	1428.2	1305.5	1550.8		10736	578.44	539.39	617.5		10195	1900.8	1847.8	1953.8		12546	1945.6	1878.9	2012.2		14540	1549.4	1472.2	1626.5		13444	947.58	914.52	980.63		11087	573.91	518.58	629.24		12801	814.36	675.78	952.95
11898	1432.2	1311.1	1553.3		10767	573.7	534.8	612.61		10224	1900.8	1847.9	1953.7		12579	1953.2	1886.2	2020.1		14580	1564.6	1486.5	1642.8		13483	947.57	914.97	980.17		11115	582.69	527.77	637.61		12834	819.31	679.48	959.14
11932	1435.8	1316.2	1555.4		10797	569.03	530.27	607.79		10254	1901.1	1848.4	1953.7		12612	1960.4	1893.2	2027.5		14620	1580.5	1501.2	1659.9		13522	947.7	915.57	979.83		11144	591.7	537.17	646.24		12866	824.15	683.22	965.09
11966	1438.8	1320.6	1556.9		10828	564.44	525.82	603.06		10284	1901.6	1849.2	1954.1		12645	1967.1	1899.9	2034.4		14660	1597	1516.4	1677.5		13562	948.02	916.37	979.67		11173	600.95	546.76	655.13		12899	828.88	687	970.76
12000	1441.3	1324.5	1558		10859	559.96	521.48	598.44		10313	1902.5	1850.2	1954.8		12678	1973.5	1906.2	2040.7		14699	1613.8	1532	1695.7		13601	948.57	917.41	979.74		11201	610.42	556.56	664.28		12931	833.48	690.82	976.13
12035	1443.2	1327.7	1558.6		10889	555.6	517.26	593.93		10343	1903.6	1851.6	1955.7		12711	1979.3	1912.1	2046.5		14739	1631.1	1548	1714.3		13640	949.42	918.75	980.09		11230	620.12	566.56	673.69		12963	837.94	694.67	981.2
12069	1444.5	1330.4	1558.7		10920	551.38	513.19	589.57		10372	1905	1853.2	1956.9		12744	1984.7	1917.7	2051.6		14779	1648.7	1564.2	1733.2		13680	950.6	920.43	980.77		11259	630.06	576.77	683.35		12996	842.24	698.53	985.95
12103	1445.3	1332.3	1558.3		10950	547.33	509.3	585.37		10402	1906.7	1855.1	1958.3		12777	1989.5	1922.8	2056.2		14819	1666.6	1580.8	1752.4		13719	952.11	922.44	981.79		11287	640.21	587.17	693.26		13028	846.37	702.37	990.37
12137	1445.4	1333.5	1557.3		10981	543.47	505.61	581.33		10431	1908.6	1857.4	1959.9		12810	1993.9	1927.6	2060.2		14858	1684.7	1597.5	1771.8		13758	953.99	924.81	983.17		11316	650.6	597.77	703.42		13061	850.31	706.18	994.44
12171	1444.9	1334	1555.8		11012	539.82	502.16	577.48		10461	1910.8	1859.9	1961.7		12843	1997.8	1931.9	2063.7		14898	1702.8	1614.4	1791.2		13797	956.26	927.57	984.95		11344	661.2	608.56	713.83		13093	854.04	709.94	998.14
12205	1443.8	1333.8	1553.8		11042	536.4	498.95	573.84		10491	1913.3	1862.7	1963.8		12876	2001.3	1935.9	2066.7		14938	1720.9	1631.4	1810.5		13837	958.98	930.76	987.19		11373	672.01	619.55	724.48		13125	857.55	713.63	1001.5
12239	1442	1332.7	1551.2		11073	533.22	496.03	570.42		10520	1915.9	1865.8	1966.1		12908	2004.3	1939.4	2069.2		14978	1739	1648.4	1829.6		13876	962.17	934.43	989.91		11402	683.05	630.72	735.37		13158	860.82	717.23	1004.4
12273	1439.4	1330.9	1548		11104	530.33	493.42	567.23		10550	1918.8	1869.1	1968.5		12941	2006.9	1942.6	2071.3		15017	1757.1	1665.5	1848.7		13915	965.83	938.55	993.11		11430	694.29	642.09	746.49		13190	863.83	720.71	1006.9
12307	1436.2	1328.3	1544.2		11134	527.73	491.14	564.33		10579	1921.9	1872.7	1971.1		12974	2009.1	1945.4	2072.8		15057	1775.1	1682.6	1867.6		13955	969.91	943.09	996.73		11459	705.73	653.63	757.84		13223	866.57	724.08	1009.1
12341	1432.3	1324.9	1539.8		11165	525.47	489.21	561.73		10609	1925.2	1876.5	1973.9		13007	2010.8	1947.8	2073.9		15097	1793.1	1699.8	1886.4		13994	974.33	947.97	1000.7		11488	717.37	665.34	769.4		13255	869.02	727.29	1010.7
12375	1427.7	1320.7	1534.7		11195	523.57	487.67	559.47		10639	1928.6	1880.4	1976.8		13040	2012.1	1949.7	2074.6		15137	1811	1716.9	1905.2		14033	979.02	953.14	1004.9		11516	729.18	677.21	781.16		13287	871.16	730.35	1012
12409	1422.3	1315.7	1528.9		11226	522.06	486.54	557.59		10668	1932.2	1884.6	1979.8		13073	2013	1951.2	2074.8		15176	1828.9	1734	1923.8		14072	983.92	958.53	1009.3		11545	741.17	689.23	793.1		13320	872.99	733.23	1012.7
12443	1416.2	1309.9	1522.5		11257	520.97	485.82	556.11		10698	1936	1889	1983		13106	2013.4	1952.3	2074.5		15216	1846.7	1751	1942.4		14112	989.03	964.14	1013.9		11573	753.31	701.39	805.22		13352	874.5	735.93	1013.1
12477	1409.4	1303.4	1515.4		11287	520.31	485.55	555.07		10727	1940	1893.5	1986.5		13139	2013.3	1952.9	2073.7		15256	1864.4	1767.9	1961		14151	994.38	969.98	1018.8		11602	765.58	713.66	817.5		13385	875.71	738.47	1012.9
12512	1401.9	1296.2	1507.6		11318	520.12	485.74	554.49		10757	1944.2	1898.3	1990.1		13172	2012.8	1953.1	2072.5		15296	1882.1	1784.7	1979.4		14190	1000	976.06	1023.9		11631	777.96	726.02	829.9		13417	876.63	740.86	1012.4
12546	1393.7	1288.3	1499.1		11348	520.39	486.38	554.4		10787	1948.6	1903.3	1993.9		13205	2011.8	1952.8	2070.8		15335	1899.5	1801.2	1997.9		14230	1005.9	982.4	1029.4		11659	790.44	738.45	842.42		13449	877.28	743.1	1011.5
12580	1384.7	1279.7	1489.8		11379	521.12	487.47	554.77		10816	1953.3	1908.6	1998		13237	2010.3	1952	2068.6		15375	1916.8	1817.5	2016.2		14269	1012.1	988.97	1035.3		11688	802.98	750.94	855.02		13482	877.68	745.21	1010.1
12614	1375.2	1270.4	1479.9		11410	522.29	488.98	555.6		10846	1958.2	1914	2002.4		13270	2008.3	1950.7	2066		15415	1934	1833.5	2034.5		14308	1018.6	995.74	1041.4		11716	815.57	763.44	867.7		13514	877.82	747.18	1008.5
12648	1364.9	1260.6	1469.3		11440	523.89	490.9	556.89		10875	1963.4	1919.8	2007.1		13303	2005.8	1948.9	2062.8		15455	1950.9	1849.1	2052.6		14347	1025.3	1002.7	1047.9		11745	828.18	775.94	880.42		13547	877.72	749	1006.4
12682	1354.2	1250.2	1458.1		11471	525.9	493.2	558.6		10905	1968.9	1925.7	2012		13336	2002.8	1946.6	2059.1		15494	1967.5	1864.3	2070.7		14387	1032.2	1009.8	1054.7		11774	840.78	788.4	893.15		13579	877.37	750.67	1004.1
12716	1342.8	1239.4	1446.3		11501	528.3	495.86	560.74		10934	1974.6	1931.9	2017.3		13369	1999.3	1943.7	2054.8		15534	1983.8	1879.1	2088.5		14426	1039.3	1017	1061.7		11802	853.34	800.79	905.88		13612	876.8	752.19	1001.4
12750	1331.1	1228.1	1434		11532	531.06	498.86	563.26		10964	1980.7	1938.4	2023		13402	1995.2	1940.3	2050.1		15574	1999.8	1893.5	2106		14465	1046.6	1024.2	1068.9		11831	865.83	813.09	918.57		13644	875.99	753.55	998.43
12784	1318.9	1216.5	1421.3		11563	534.15	502.17	566.14		10994	1987.1	1945.2	2029		13435	1990.6	1936.4	2044.9		15614	2015.4	1907.4	2123.3		14505	1054	1031.5	1076.4		11860	878.22	825.26	931.18		13676	874.97	754.76	995.18
12818	1306.4	1204.6	1408.2		11593	537.57	505.77	569.37		11023	1993.8	1952.2	2035.4		13468	1985.6	1931.9	2039.3		15653	2030.6	1920.8	2140.3		14544	1061.4	1038.9	1084		11888	890.47	837.26	943.68		13709	873.73	755.8	991.66
12852	1293.6	1192.4	1394.8		11624	541.29	509.65	572.93		11053	2000.9	1959.5	2042.2		13501	1980.2	1927.1	2033.3		15693	2045.3	1933.7	2156.9		14583	1068.9	1046.2	1091.7		11917	902.54	849.06	956.02		13741	872.28	756.67	987.89
12886	1280.6	1180	1381.1		11655	545.31	513.8	576.81		11082	2008.2	1967	2049.3		13534	1974.5	1921.9	2027.1		15733	2059.6	1946.1	2173.1		14622	1076.4	1053.4	1099.5		11945	914.39	860.61	968.17		13774	870.63	757.37	983.9
12920	1267.4	1167.5	1367.2		11685	549.6	518.22	580.99		11112	2015.7	1974.7	2056.7		13567	1968.5	1916.4	2020.6		15773	2073.3	1957.9	2188.7		14662	1083.8	1060.5	1107.2		11974	925.98	871.88	980.08		13806	868.79	757.89	979.68
12954	1254.1	1154.9	1353.3		11716	554.17	522.89	585.46		11142	2023.5	1982.6	2064.4		13599	1962.3	1910.7	2013.9		15812	2086.5	1969.1	2203.8		14701	1091	1067.3	1114.7		12003	937.26	882.83	991.7		13838	866.75	758.23	975.27
12988	1240.8	1142.3	1339.2		11746	559.01	527.8	590.21		11171	2031.6	1990.7	2072.5		13632	1955.9	1904.7	2007.1		15852	2099	1979.8	2218.3		14740	1097.9	1073.9	1121.9		12031	948.21	893.41	1003		13871	864.53	758.39	970.67
13023	1227.5	1129.7	1325.2		11777	564.09	532.94	595.24		11201	2039.8	1998.9	2080.8		13665	1949.4	1898.5	2000.2		15892	2111	1989.8	2232.1		14780	1104.4	1080.1	1128.8		12060	958.76	903.59	1013.9		13903	862.14	758.36	965.91
13057	1214.2	1117.2	1311.2		11808	569.43	538.31	600.54		11230	2048.3	2007.2	2089.3		13698	1942.8	1892.2	1993.3		15932	2122.3	1999.3	2245.3		14819	1110.7	1085.9	1135.5		12088	968.88	913.33	1024.4		13936	859.57	758.14	961
13091	1201.1	1104.8	1297.4		11838	575.01	543.91	606.11		11260	2056.9	2015.6	2098.1		13731	1936.1	1885.9	1986.4		15971	2133	2008.1	2257.8		14858	1116.8	1091.5	1142		12117	978.52	922.59	1034.5		13968	856.84	757.73	955.95
13125	1188.1	1092.5	1283.7		11869	580.83	549.72	611.94		11289	2065.6	2024.2	2107		13764	1929.5	1879.4	1979.6		16011	2143	2016.4	2269.6		14897	1122.8	1097.1	1148.5		12146	987.65	931.32	1044		14000	853.95	757.12	950.79
13159	1175.4	1080.5	1270.3		11899	586.89	555.74	618.05		11319	2074.5	2032.8	2116.2		13797	1922.9	1873	1972.9		16051	2152.4	2024.1	2280.8		14937	1128.8	1102.6	1155		12174	996.22	939.49	1052.9		14033	850.92	756.32	945.52
13193	1162.9	1068.7	1257.1		11930	593.18	561.94	624.41		11349	2083.5	2041.5	2125.5		13830	1916.4	1866.6	1966.3		16091	2161.2	2031.2	2291.3		14976	1135	1108.2	1161.8		12203	1004.2	947.07	1061.3		14065	847.75	755.33	940.16
13227	1150.7	1057.1	1244.3		11961	599.68	568.33	631.02		11378	2092.5	2050.2	2134.9		13863	1910.1	1860.3	1959.9		16130	2169.4	2037.8	2301		15015	1141.2	1113.8	1168.7		12232	1011.5	954.03	1069		14098	844.46	754.16	934.75
13261	1138.9	1045.9	1231.9		11991	606.35	574.85	637.85		11408	2101.7	2059	2144.4		13896	1903.9	1854	1953.8		16170	2177	2043.9	2310.1		15054	1147.6	1119.5	1175.7		12260	1018.2	960.33	1076.1		14130	841.07	752.83	929.31
13295	1127.5	1035.1	1219.8		12022	613.14	581.45	644.83		11437	2110.9	2067.8	2153.9		13928	1897.9	1847.9	1947.9		16210	2184	2049.4	2318.6		15094	1154.1	1125.2	1183		12289	1024.2	965.96	1082.4		14162	837.59	751.34	923.84
13329	1116.5	1024.7	1208.3		12052	620	588.08	651.91		11467	2120	2076.6	2163.5		13961	1892.1	1842	1942.2		16249	2190.5	2054.6	2326.5		15133	1160.6	1130.8	1190.3		12317	1029.5	970.89	1088		14195	834.05	749.71	918.39
13363	1106	1014.7	1197.3		12083	626.87	594.7	659.04		11497	2129.2	2085.3	2173.1		13994	1886.5	1836.1	1936.8		16289	2196.5	2059.2	2333.8		15172	1167.1	1136.4	1197.7		12346	1034	975.1	1092.9		14227	830.48	747.96	912.99
13397	1096	1005.1	1186.9		12114	633.71	601.26	666.16		11526	2138.3	2094	2182.6		14027	1881	1830.3	1931.7		16329	2202	2063.5	2340.6		15212	1173.6	1142	1205.2		12375	1037.7	978.56	1096.9		14260	826.88	746.11	907.65
13431	1086.6	996.05	1177.1		12144	640.48	607.72	673.24		11556	2147.3	2102.6	2192.1		14060	1875.7	1824.6	1926.8		16369	2207.1	2067.3	2346.9		15251	1180	1147.3	1212.6		12403	1040.7	981.28	1100.2		14292	823.29	744.16	902.42
13465	1077.7	987.53	1168		12175	647.13	614.03	680.23		11585	2156.3	2111	2201.5		14093	1870.6	1819	1922.1		16408	2211.8	2070.8	2352.7		15290	1186.2	1152.5	1219.9		12432	1043	983.24	1102.7		14324	819.74	742.15	897.32
13500	1069.6	979.59	1159.6		12206	653.64	620.18	687.1		11615	2165	2119.3	2210.8		14126	1865.6	1813.6	1917.7		16448	2216	2073.9	2358.1		15329	1192.3	1157.4	1227.1		12460	1044.4	984.45	1104.4		14357	816.24	740.08	892.39
13534	1062.1	972.26	1152		12236	659.98	626.14	693.82		11645	2173.6	2127.4	2219.9		14159	1860.9	1808.2	1913.5		16488	2219.9	2076.8	2363		15369	1198.1	1162.2	1234.1		12489	1045.1	984.88	1105.3		14389	812.81	737.98	887.64
13568	1055.4	965.59	1145.3		12267	666.11	631.87	700.35		11674	2182	2135.3	2228.8		14192	1856.3	1802.9	1909.6		16528	2223.4	2079.3	2367.5		15408	1203.8	1166.8	1240.8		12518	1045.1	984.55	1105.6		14422	809.46	735.83	883.08
13602	1049.5	959.64	1139.5		12297	672	637.35	706.66		11704	2190.2	2143	2237.4		14225	1851.8	1797.8	1905.9		16567	2226.7	2081.6	2371.7		15447	1209.2	1171.2	1247.3		12546	1044.3	983.46	1105		14454	806.21	733.67	878.75
13636	1044.5	954.44	1134.6		12328	677.64	642.57	712.72		11733	2198.2	2150.5	2245.9		14258	1847.6	1792.7	1902.5		16607	2229.6	2083.8	2375.5		15487	1214.4	1175.4	1253.5		12575	1042.7	981.63	1103.8		14487	803.07	731.48	874.65
13670	1040.3	950.05	1130.6		12359	683.01	647.51	718.52		11763	2205.9	2157.7	2254.1		14290	1843.5	1787.8	1899.3		16647	2232.4	2085.7	2379		15526	1219.4	1179.4	1259.3		12604	1040.5	979.07	1101.9		14519	800.04	729.29	870.79
13704	1037.1	946.52	1127.8		12389	688.09	652.15	724.03		11792	2213.4	2164.7	2262		14323	1839.7	1783	1896.4		16687	2234.9	2087.6	2382.2		15565	1224	1183.2	1264.8		12632	1037.6	975.79	1099.3		14551	797.16	727.11	867.21
13738	1034.9	943.9	1126		12420	692.86	656.5	729.23		11822	2220.5	2171.4	2269.6		14356	1835.9	1778.2	1893.6		16726	2237.4	2089.5	2385.3		15604	1228.3	1186.9	1269.8		12661	1034	971.82	1096.1		14584	794.42	724.94	863.9
13772	1033.8	942.23	1125.3		12450	697.31	660.52	734.11		11852	2227.4	2177.9	2276.9		14389	1832.3	1773.5	1891.1		16766	2239.8	2091.5	2388.2		15644	1232.4	1190.3	1274.4		12689	1029.7	967.19	1092.2		14616	791.84	722.8	860.88
13806	1033.6	941.56	1125.7		12481	701.43	664.22	738.64		11881	2234	2184.1	2283.9		14422	1828.9	1768.9	1888.8		16806	2242.3	2093.6	2391.1		15683	1236.1	1193.4	1278.7		12718	1024.8	961.91	1087.8		14649	789.44	720.7	858.18
13840	1034.6	941.94	1127.3		12512	705.21	667.58	742.84		11911	2240.3	2190.1	2290.6		14455	1825.5	1764.4	1886.6		16846	2244.9	2095.8	2394		15722	1239.5	1196.4	1282.5		12747	1019.3	956.01	1082.7		14681	787.23	718.66	855.8
13874	1036.8	943.42	1130.1		12542	708.64	670.6	746.68		11940	2246.3	2195.7	2296.9		14488	1822.3	1759.9	1884.7		16885	2247.6	2098.2	2396.9		15762	1242.6	1199.1	1286.1		12775	1013.3	949.54	1077		14713	785.24	716.71	853.76
13908	1040.1	946.05	1134.2		12573	711.73	673.27	750.18		11970	2251.9	2201.1	2302.8		14521	1819.2	1755.5	1882.9		16925	2250.3	2100.8	2399.9		15801	1245.5	1201.7	1289.4		12804	1006.7	942.52	1070.8		14746	783.47	714.85	852.08
13942	1044.6	949.86	1139.4		12603	714.46	675.59	753.33		12000	2257.3	2206.2	2308.4		14554	1816.3	1751.2	1881.4		16965	2253.2	2103.5	2402.9		15840	1248.3	1204.1	1292.6		12832	999.59	935	1064.2		14778	781.95	713.13	850.77
13977	1050.4	954.91	1145.9		12634	716.85	677.55	756.14		12029	2262.3	2210.9	2313.7		14587	1813.5	1746.9	1880.1		17005	2256	2106.2	2405.8		15879	1251.1	1206.4	1295.7		12861	992.05	927.03	1057.1		14811	780.72	711.57	849.87
14011	1057.5	961.23	1153.7		12665	718.88	679.16	758.6		12059	2266.9	2215.4	2318.5		14619	1810.9	1742.8	1878.9		17044	2258.8	2108.9	2408.7		15919	1253.8	1208.7	1298.8		12890	984.1	918.63	1049.6		14843	779.8	710.21	849.4
14045	1065.8	968.87	1162.7		12695	720.57	680.42	760.72		12088	2271.3	2219.5	2323		14652	1808.5	1738.9	1878.1		17084	2261.6	2111.7	2411.4		15958	1256.5	1211.1	1302		12918	975.79	909.85	1041.7		14875	779.22	709.07	849.38
14079	1075.4	977.85	1173		12726	721.92	681.33	762.5		12118	2275.2	2223.3	2327.2		14685	1806.3	1735.1	1877.5		17124	2264.2	2114.4	2414.1		15997	1259.4	1213.5	1305.4		12947	967.16	900.73	1033.6		14908	779.02	708.19	849.85
14113	1086.4	988.23	1184.6		12757	722.93	681.91	763.94		12147	2278.9	2226.8	2331		14718	1804.4	1731.6	1877.2		17164	2266.9	2117.1	2416.7		16037	1262.5	1216	1309		12976	958.24	891.31	1025.2		14940	779.22	707.61	850.83
14147	1098.7	1000	1197.5		12787	723.61	682.16	765.07		12177	2282.1	2229.9	2334.4		14751	1802.8	1728.4	1877.3		17203	2269.5	2119.8	2419.2		16076	1265.8	1218.7	1312.9		13004	949.07	881.64	1016.5		14973	779.85	707.36	852.34
14181	1112.4	1013.3	1211.6		12818	723.98	682.1	765.87		12207	2285	2232.7	2337.4		14784	1801.5	1725.4	1877.7		17243	2272.2	2122.6	2421.7		16115	1269.4	1221.5	1317.2		13033	939.69	871.75	1007.6		15005	780.95	707.47	854.42
14215	1127.5	1028	1227		12848	724.05	681.73	766.37		12236	2287.6	2235.2	2340		14817	1800.6	1722.7	1878.4		17283	2274.8	2125.5	2424.2		16154	1273.3	1224.6	1321.9		13061	930.13	861.68	998.58		15037	782.53	707.97	857.08
14249	1143.9	1044.2	1243.6		12879	723.82	681.07	766.56		12266	2289.8	2237.4	2342.2		14850	1799.9	1720.4	1879.4		17323	2277.6	2128.4	2426.7		16194	1277.6	1228.1	1327.2		13090	920.4	851.45	989.36		15070	784.62	708.89	860.34
14283	1161.6	1061.8	1261.5		12910	723.3	680.15	766.46		12295	2291.7	2239.2	2344.1		14883	1799.6	1718.3	1880.8		17362	2280.4	2131.5	2429.3		16233	1282.5	1232	1333		13119	910.55	841.1	979.99		15102	787.24	710.24	864.23
14317	1180.7	1080.9	1280.5		12940	722.52	678.96	766.08		12325	2293.2	2240.7	2345.6		14916	1799.6	1716.6	1882.5		17402	2283.3	2134.7	2432		16272	1288	1236.4	1339.6		13147	900.59	830.66	970.51		15135	790.42	712.06	868.78
14351	1201	1101.4	1300.6		12971	721.48	677.54	765.43		12355	2294.3	2241.9	2346.7		14949	1799.9	1715.2	1884.6		17442	2286.4	2138.1	2434.7		16312	1294.2	1241.5	1347		13176	890.56	820.18	960.95		15167	794.17	714.36	873.99
14385	1222.5	1123.2	1321.8		13001	720.21	675.9	764.52		12384	2295.1	2242.7	2347.4		14981	1800.6	1714.2	1887		17482	2289.6	2141.6	2437.6		16351	1301.4	1247.4	1355.4		13205	880.52	809.7	951.34		15199	798.54	717.18	879.9
14419	1245.2	1146.4	1344		13032	718.74	674.08	763.4		12414	2295.5	2243.2	2347.7		15014	1801.6	1713.5	1889.7		17521	2293.1	2145.5	2440.7		16390	1309.3	1254	1364.6		13233	870.5	799.26	941.73		15232	803.53	720.54	886.53
14454	1269	1170.8	1367.2		13063	717.09	672.11	762.07		12443	2295.5	2243.4	2347.6		15047	1803	1713.3	1892.7		17561	2296.7	2149.5	2443.9		16429	1318.2	1261.5	1374.9		13262	860.52	788.9	932.15		15264	809.18	724.46	893.9
14488	1293.8	1196.4	1391.3		13093	715.29	670.01	760.56		12473	2295.1	2243.2	2347		15080	1804.7	1713.4	1896.1		17601	2300.6	2153.9	2447.3		16469	1327.9	1269.7	1386.1		13290	850.63	778.63	922.63		15297	815.5	728.97	902.03
14522	1319.7	1223.1	1416.4		13124	713.37	667.83	758.92		12503	2294.4	2242.7	2346.1		15113	1806.8	1713.9	1899.7		17641	2304.8	2158.6	2450.9		16508	1338.5	1278.7	1398.2		13319	840.85	768.51	913.19		15329	822.53	734.1	910.95
14556	1346.5	1250.8	1442.3		13154	711.37	665.59	757.16		12532	2293.2	2241.8	2344.7		15146	1809.2	1714.7	1903.6		17680	2309.3	2163.7	2454.8		16547	1349.8	1288.5	1411.2		13348	831.21	758.55	903.87		15362	830.28	739.87	920.68
14590	1374.2	1279.5	1468.9		13185	709.32	663.32	755.32		12562	2291.7	2240.5	2342.9		15179	1812	1716.1	1907.9		17720	2314	2169.1	2458.8		16587	1362	1298.9	1425.1		13376	821.75	748.81	894.7		15394	838.76	746.29	931.22
14624	1402.7	1309	1496.4		13216	707.24	661.06	753.43		12591	2289.7	2238.8	2340.5		15212	1815.1	1717.8	1912.4		17760	2318.9	2174.8	2463.1		16626	1374.9	1309.9	1439.8		13405	812.51	739.31	885.71		15426	847.94	753.33	942.55
14658	1431.9	1339.4	1524.5		13246	705.17	658.83	751.52		12621	2287.3	2236.8	2337.8		15245	1818.5	1719.9	1917.1		17800	2324	2180.6	2467.5		16665	1388.4	1321.6	1455.3		13433	803.53	730.1	876.95		15459	857.79	760.97	954.62
14692	1461.8	1370.4	1553.2		13277	703.14	656.67	749.62		12650	2284.5	2234.4	2334.5		15278	1822.3	1722.5	1922		17839	2329.2	2186.5	2471.9		16704	1402.7	1333.8	1471.6		13462	794.83	721.22	868.44		15491	868.29	769.18	967.4
14726	1492.2	1402	1582.5		13308	701.19	654.61	747.77		12680	2281.2	2231.6	2330.8		15310	1826.3	1725.4	1927.2		17879	2334.4	2192.5	2476.4		16744	1417.6	1346.6	1488.6		13491	786.45	712.69	860.21		15524	879.41	777.95	980.87
14760	1523.2	1434.1	1612.3		13338	699.36	652.7	746.01		12710	2277.6	2228.5	2326.7		15343	1830.7	1728.8	1932.6		17919	2339.6	2198.4	2480.9		16783	1433.2	1359.9	1506.4		13519	778.41	704.55	852.28		15556	891.12	787.25	994.99
14794	1554.6	1466.6	1642.6		13369	697.69	651	744.39		12739	2273.6	2225	2322.1		15376	1835.4	1732.6	1938.1		17959	2344.8	2204.3	2485.4		16822	1449.3	1373.8	1524.8		13548	770.75	696.83	844.68		15588	903.39	797.06	1009.7
14828	1586.4	1499.5	1673.2		13399	696.24	649.54	742.94		12769	2269.2	2221.3	2317.1		15409	1840.4	1736.9	1943.8		17998	2350	2210.2	2489.9		16862	1465.9	1388.1	1543.7		13577	763.5	689.56	837.44		15621	916.19	807.35	1025
[truncated: 570 more rows]
