# Supplementary material for: Rejuvenating the ocean: mean ocean radiocarbon, CO 2 release, and radiocarbon budget closure across the last deglaciation
Source: Copernicus journal article supplement (doi:10.5194/cp-19-2177-2023), 2023-11-03
Supplement: Supplementary file 3 [file TableS1.xlsx]

## Sheet: Sheet1
			INT		FIX		CONST
Scenario	Ventilation parameter changed	Reduction (%)	D(B-Atm) vs PI	D(pCO2) vs PI	D(B-Atm) vs PI	D(pCO2) vs PI	D(B-Atm) vs PI	D(pCO2) vs PI
41 ka	Control	0	1164.5	-13.1	92.2014	-13.1442	100.271	-13.1442
	S.O. wind	20	1219.6	-17.3	127.944	-17.2981
		40	1239.3	-20.1	138.519	-20.1361
		60	1214.7	-21.4	119.886	-21.3611
		80	1151.4	-20.2	76.5607	-20.2404
	S.O gas exchange	20	1223.3	-14.1	132.28	-14.1223
		40	1290.7	-15.4	178.594	-15.4451
		60	1369.6	-17.4	233.186	-17.3737
		80	1464.7	-20.6	299.875	-20.5525
	vertical diffusivity	20	1237.3	-15.8	142.482	-15.7879
		40	1322.9	-18.8	202.152	-18.7733
		60	1400.8	-21.2	258.063	-21.1766
		80	1465.8	-23	305.382	-22.9744
	all	20	1362.7	-21.3	227.37	-21.3446
		40	1524.2	-27.7	338.538	-27.6712
		60	1627.7	-32.1	411.294	-32.0594	417.526	-32.0594
		80	1627.2	-30.4	408.238	-30.4422
LGM	Control	0	218.9	-18.5	143.147	-18.5139	147.938	-18.5139
	S.O. wind	20	248	-22.2	175.673	-22.2052
		40	251.6	-24.7	179.837	-24.6505
		60	227	-25.5	152.453	-25.4932
		80	183.4	-24	105.038	-24.048
	S.O gas exchange	20	254.1	-19.5	182.312	-19.5271
		40	294.6	-20.9	227.316	-20.8832
		60	342.2	-22.8	280.034	-22.8332
		80	399.9	-26	343.969	-25.9796
	vertical diffusivity	20	269	-21.2	198.85	-21.1997
		40	328.2	-23.1	264.45	-23.0828
		60	383.5	-24.8	325.243	-24.7651
		80	416.5	-26.4	376.426	-26.0651
	all	20	337.6	-26	275.096	-26.0249
		40	466.5	-32.6	417.737	-32.5739
		60	519.5	-36.2	476.732	-36.1985	477.162	-36.1985
		80	476.2	-33.8	428.899	-33.8493
BA	Control	0	-96.1	-9.7	119.591	-9.6558	109.069	-9.6558
	S.O. wind	20	-95.5	-9.3	119.229	-9.2549
		40	-104.4	-8.7	108.528	-8.7264
		60	-119.8	-7.9	89.7055	-7.9369
		80	-143.9	-7	61.3269	-7.0218
	S.O gas exchange	20	-87.2	-9.7	129.272	-9.6817
		40	-77.4	-9.7	139.968	-9.7089
		60	-66.4	-9.7	151.95	-9.7377
		80	-53.6	-9.8	165.683	-9.7684
	vertical diffusivity	20	-77	-10.1	141.492	-10.0796
		40	-58.5	-10.5	162.684	-10.5227
		60	-38.1	-11	186.207	-11.0254
		80	-20.2	-11.4	206.313	-11.4426
	all	20	-65.1	-9.8	153.657	-9.8308
		40	-43.7	-9.7	176.869	-9.7253
		60	-34	-9.3	186.336	-9.3373	101.434	-9.3373
		80	-40.7	-8.7	177.986	-8.7162
